# Supplementary material for: Stereoselective synthesis of pentasubstituted 1,3-dienesviaNi-catalyzed reductive coupling of unsymmetrical internal alkynes
Source: Royal Society of Chemistry journal article supplement (doi:10.1039/d0sc04173d), 2020-01-01
Supplement: d0sc04173d1.pdf [file d0sc04173d1.pdf]

---

**Supporting information**

**Stereoselective Synthesis of Pentasubstituted 1,3-Dienes via Ni-Catalyzed Reductive Coupling of Unsymmetrical Internal Alkynes**

Zhijun Zhou, Jiachang Chen, Herong Chen and Wangqing Kong\*

The Center for Precision Synthesis (CPS), Institute for Advanced Studies, Wuhan University, 299 Bayi Road, Wuhan 430072, People's Republic of China

---

# Contents

|                                                                                  |      |
|----------------------------------------------------------------------------------|------|
| 1. General information                                                           | S3   |
| 2. General procedures                                                            | S4   |
| 3. Deuterium-labelling Experiments                                               | S5   |
| 4. Relationship between the ee values of the ligand and product                  | S8   |
| 5. Control experiments                                                           | S9   |
| 6. General procedure for the synthesis of starting materials                     | S10  |
| 7. Characterization data of products                                             | S12  |
| 8. Synthetic Applications                                                        | S105 |
| 9. Crystallographic data for compound <b>3a</b> , <b>8</b> and <b>9</b>          | S108 |
| 10. Copies of the $^1\text{H}$ , $^{19}\text{F}$ and $^{13}\text{C}$ NMR spectra | S173 |
| 11. References                                                                   | S230 |

---

## 1. General Information

$^1\text{H}$  and  $^{13}\text{C}$  NMR data were recorded with Bruker ADVANCE III (400 MHz) or JNM-ECZ400S/L1 (400 MHz) spectrometers. Chemical shifts are given in ppm. The spectra are calibrated to the residual  $^1\text{H}$  and  $^{13}\text{C}$  signals of the solvents. Multiplicities are abbreviated as follows: singlet (s), doublet (d), triplet (t), quartet (q), doublet-doublet (dd), quintet (quint), septet (sept), multiplet (m), and broad (b).  $^{19}\text{F}$  NMR spectra were recorded using  $\text{CFCl}_3$  as internal standard. Gas chromatography were determined with a Varian GC 2000 gas chromatography instrument with a FID detector. High-resolution mass spectra (HRMS) were recorded on DIONEX UltiMate 3000 & Bruker Compact TOF mass spectrometer. Enantiomeric excesses were determined with a SHIMADZU LC-20ADXR system using chiral stationary phase columns (DAICEL) by comparing the samples with the corresponding racemic samples. Column and elution details were specified in each entry.

**Materials and Methods:** Unless otherwise stated, starting materials were purchased from commercial suppliers (Adamas-beta<sup>®</sup>, Alfa, Aldrich and so on). All reactions dealing with air- or moisture-sensitive compounds were performed in the argon-filled glove box or by standard Schlenk techniques in oven-dried reaction vessels under argon atmosphere. Solvents were purchased in HPLC quality, degassed by purging thoroughly with nitrogen and dried over activated molecular sieves of appropriate size. More sensitive compounds were stored in a desiccator or in a glove-box if required. Reactions were monitored by thin layer chromatography (TLC) using glass 0.25 mm silica gel plates. Compounds were visualized by UV-light at 254 nm and by dipping the plates in an aqueous potassium permanganate solution followed by heating. Flash column chromatography was performed over silica gel (200-400 mesh).

## 2. General Procedures

### 2.1 General Procedure for the Reductive Self-Coupling Reaction:

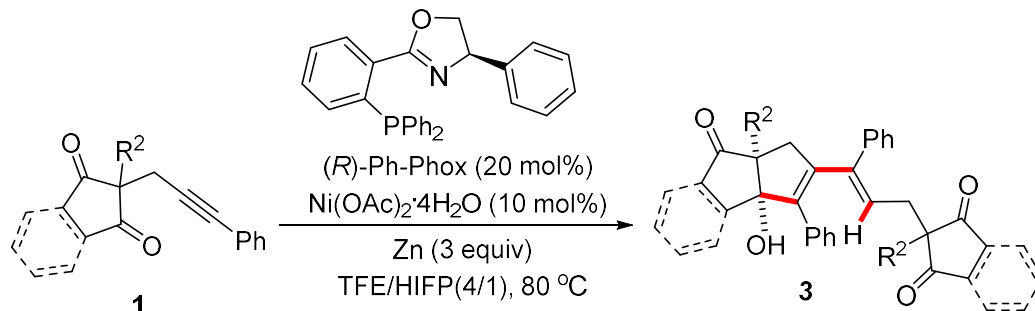

A mixture of  $\text{Ni}(\text{OAc})_2 \cdot 4\text{H}_2\text{O}$  (10 mol%),  $(R)$ -Ph-Phox (20 mol%), dry HFIP (0.4 mL) and dry TFE (1.6 mL) was stirred in a sealed tube at room temperature for 20 min under argon. To the resulting solution was added alkyne substrate **1** (0.2 mmol) and Zn (0.6 mmol), the reaction mixture was heated at 80 °C until the reaction was complete (monitored by TLC). The solvent was then removed under vacuum and the residue was purified by chromatography on silica gel, eluting with ethyl acetate/petroleum ether 1:4~1:1 (v/v) to afford the product **3**.

### 2.2 General Procedure for the Reductive Cross-Coupling Reaction:

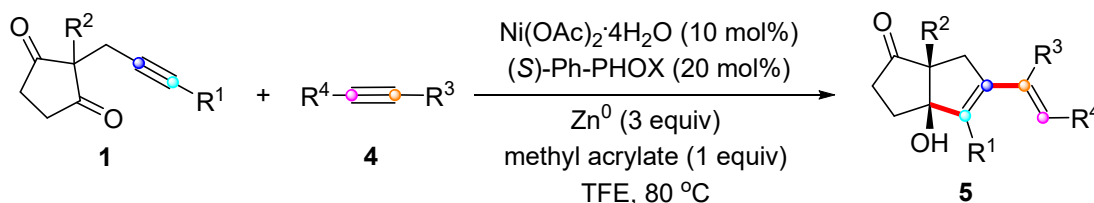

A mixture of  $\text{Ni}(\text{OAc})_2 \cdot 4\text{H}_2\text{O}$  (10 mol%),  $(S)$ -Ph-Phox (20 mol%), dry TFE (1 mL) was stirred in a sealed tube at room temperature for 20 min under argon. To the resulting solution was added alkyne **1** (0.2 mmol), internal alkyne **4** (0.1 mmol), methyl acrylate (0.1 mmol) and Zn (0.3 mmol), the reaction mixture was heated at 80 °C until the reaction was complete (monitored by TLC). The solvent was then removed under vacuum and the residue was purified by chromatography on silica gel, eluting with ethyl acetate/petroleum ether 1:4~4:1 (v/v) to afford the product **5**.

### 3. Deuterium-labelling Experiments

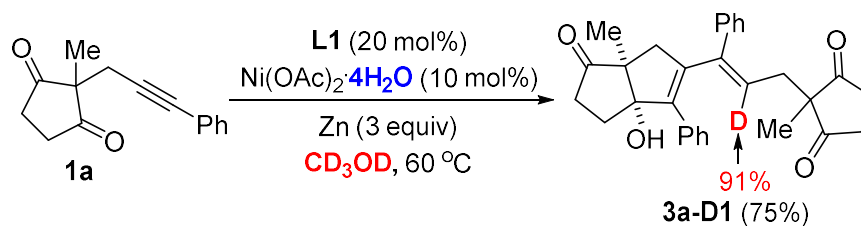

**Experimental procedure:** To a mixture of Ni(OAc)<sub>2</sub>·4H<sub>2</sub>O (0.01 mmol, 2.5 mg), L1 (0.02 mmol, 7.2 mg), Zn (0.3 mmol, 19.6 mg) and dry CD<sub>3</sub>OD (1 mL) in a sealed tube was added **1a** (0.1 mmol, 22.6 mg) under Argon. The reaction mixture was heated at 60 °C for 72 hours until the reaction was complete (monitored by TLC). The solvent was then removed under vacuum and the residue was purified by chromatography on silica gel, eluting with ethyl acetate/petroleum ether 1:4~1:1 (v/v) to afford the desired product **3a-D1** in 75% yield with 91% deuterium incorporation.

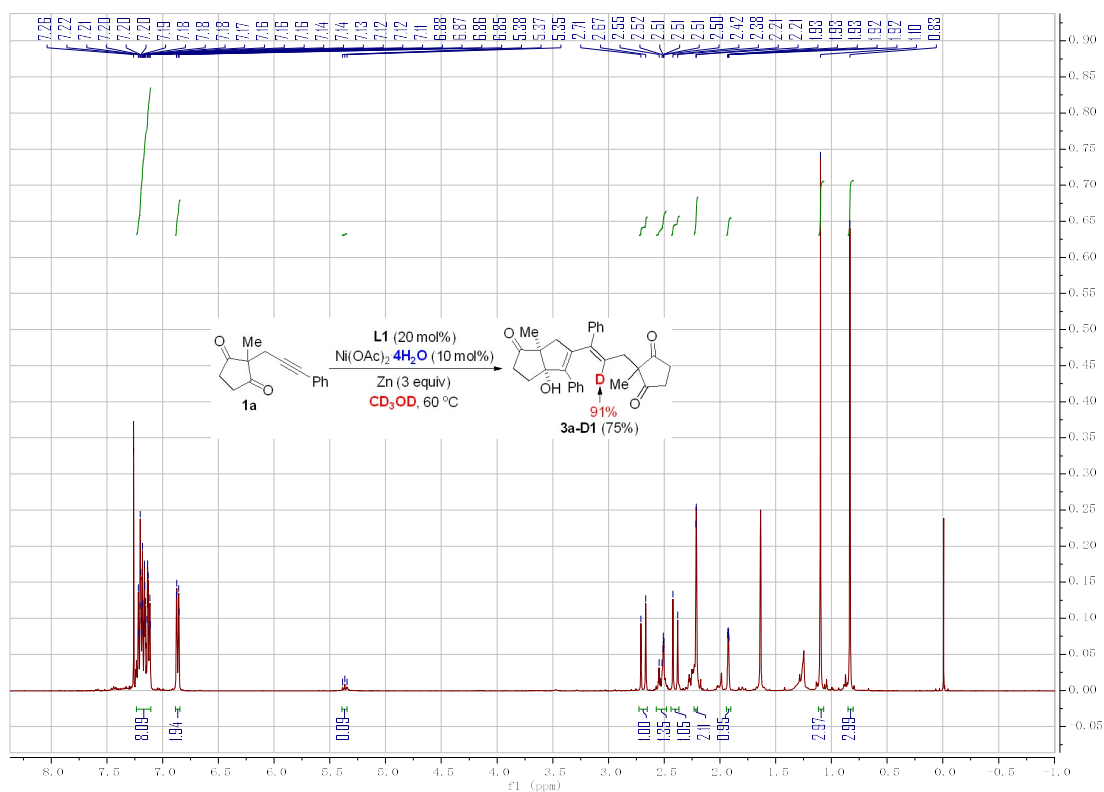

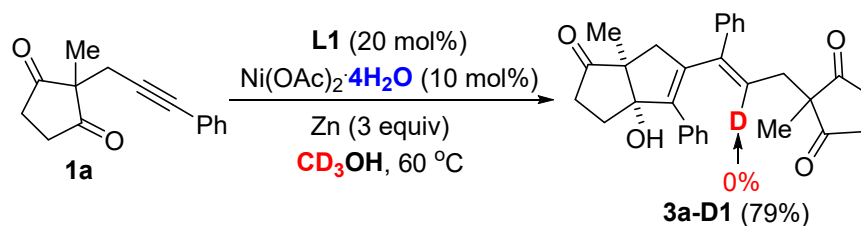

**Experimental procedure:** To a mixture of Ni(OAc)<sub>2</sub>·4H<sub>2</sub>O (0.01 mmol, 2.5 mg), L1 (0.02 mmol, 7.2 mg), Zn (0.3 mmol, 19.6 mg) and dry CD<sub>3</sub>OH (1 mL) in a sealed tube was added **1a** (0.1 mmol, 22.6 mg) under Argon. The reaction mixture was heated at 60 °C for 72 hours until the reaction was complete (monitored by TLC). The solvent was then removed under vacuum and the residue was purified by chromatography on silica gel, eluting with ethyl acetate/petroleum ether 1:4~1:1 (v/v) to afford the desired product **3a-D1** in 79% yield with 0% deuterium incorporation.

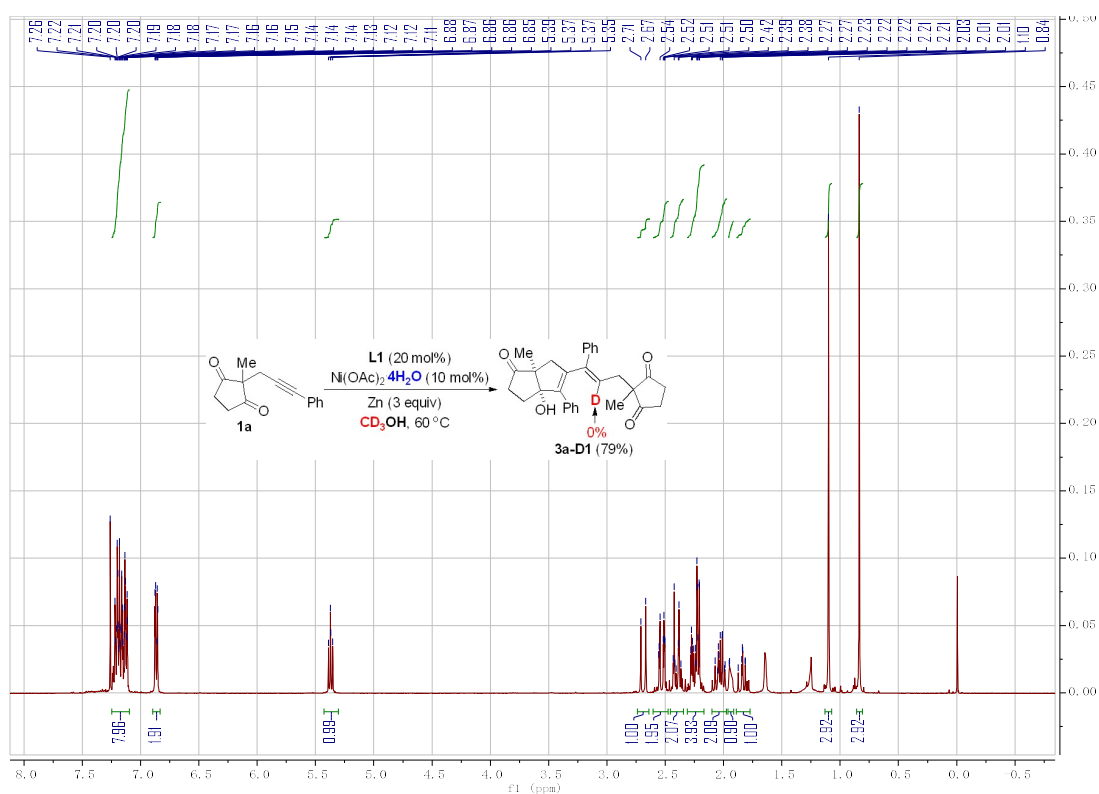

**Conclusion:** The proton was not from the methyl moiety of methanol and methanol might not act as a reducing reagent in the present reaction.

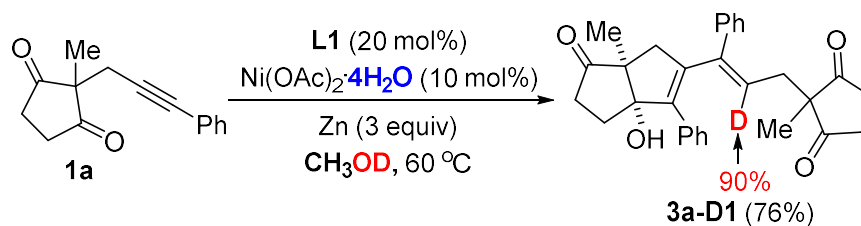

**Experimental procedure:** To a mixture of Ni(OAc)<sub>2</sub>·4H<sub>2</sub>O (0.01 mmol, 2.5 mg), L1 (0.02 mmol, 7.2 mg), Zn (0.3 mmol, 19.6 mg) and dry CH<sub>3</sub>OD (1 mL) in a sealed tube was added **1a** (0.1 mmol, 22.6 mg) under Argon. The reaction mixture was heated at 60 °C for 72 hours until the reaction was complete (monitored by TLC). The solvent was then removed under vacuum and the residue was purified by chromatography on silica gel, eluting with ethyl acetate/petroleum ether 1:4~1:1 (v/v) to afford the desired product **3a-D1** in 76% yield with 90% deuterium incorporation.

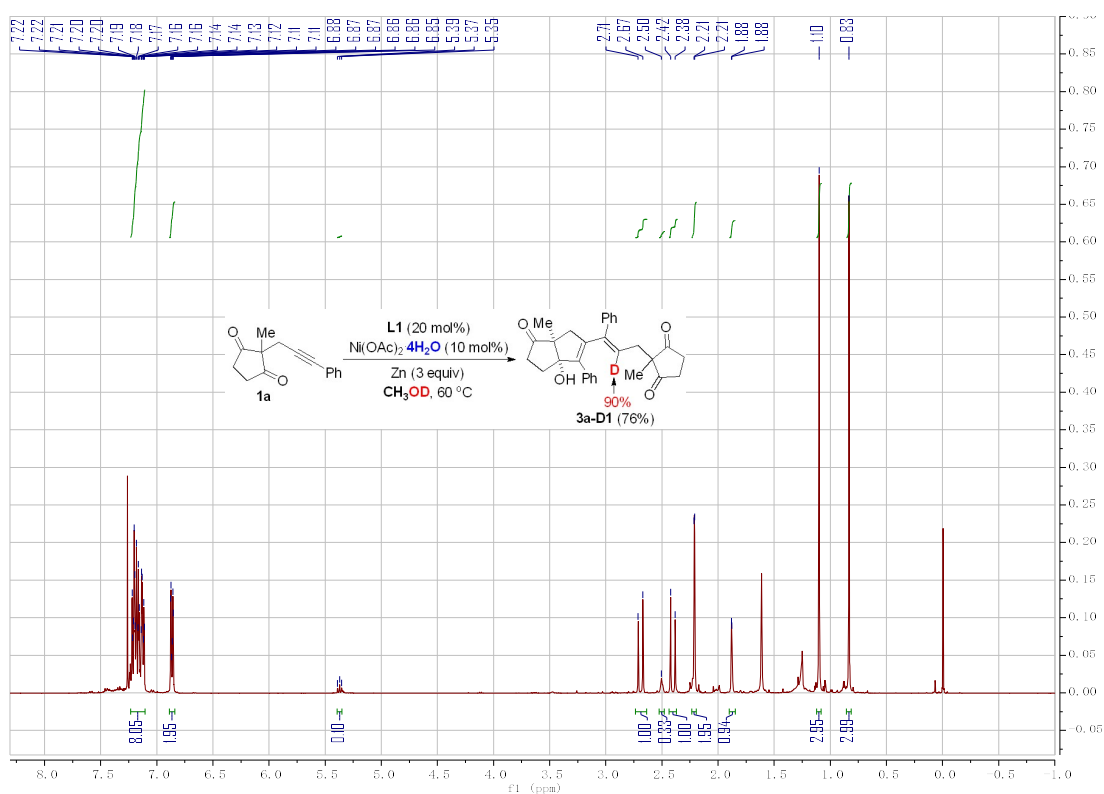

**Conclusion:** The proton was supplied from the hydroxyl of methanol.

#### 4. Relationship between the ee values of the ligand and product

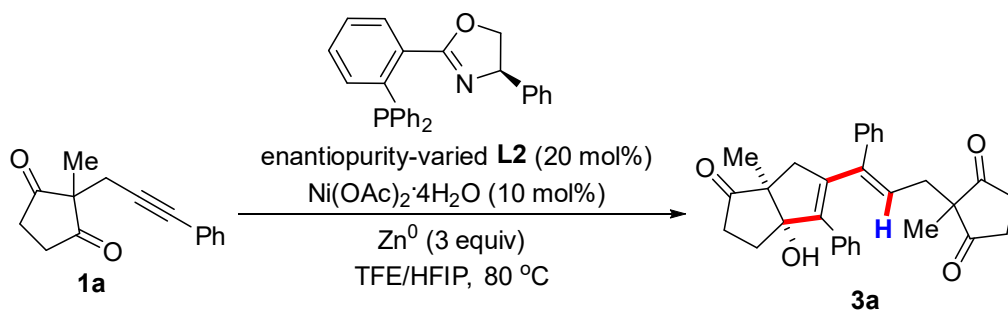

|     |                    |                           |
|-----|--------------------|---------------------------|
| (1) | <b>L2</b> (15% ee) | <b>3a</b> (84% y, 12% ee) |
| (2) | <b>L2</b> (25% ee) | <b>3a</b> (85% y, 19% ee) |
| (3) | <b>L2</b> (50% ee) | <b>3a</b> (86% y, 41% ee) |
| (4) | <b>L2</b> (75% ee) | <b>3a</b> (85% y, 59% ee) |
| (5) | <b>L2</b> (90% ee) | <b>3a</b> (83% y, 81% ee) |
| (6) | <b>L2</b> (99% ee) | <b>3a</b> (85% y, 95% ee) |

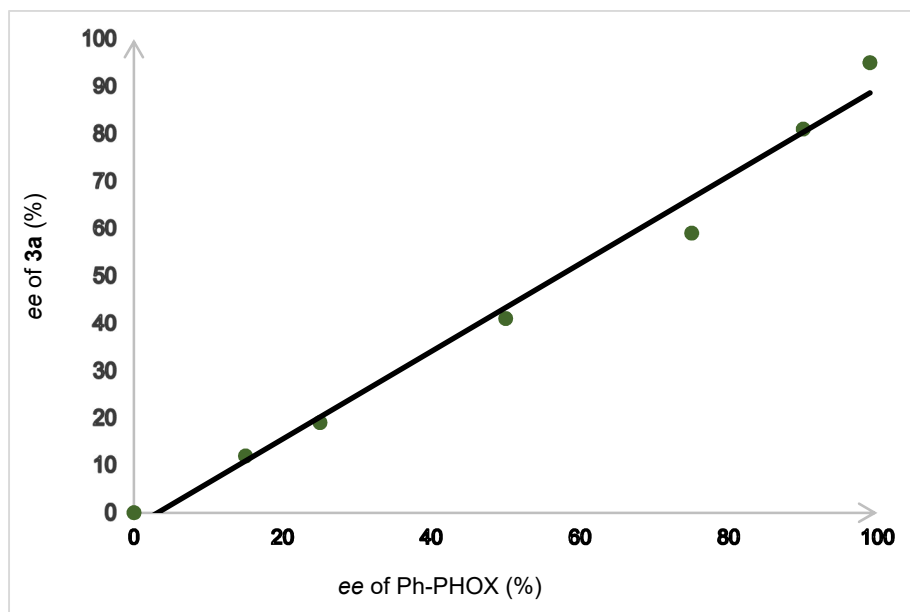

Relationship between the ee values of the ligand Ph-PHOX and product **3a**.

**Conclusion:** A linear relationship between the ee values of the ligand and product **3a** was observed, supporting that the reaction is catalyzed by a nickel complex bearing a single Ph-PHOX ligand.



## 5. Control experiments

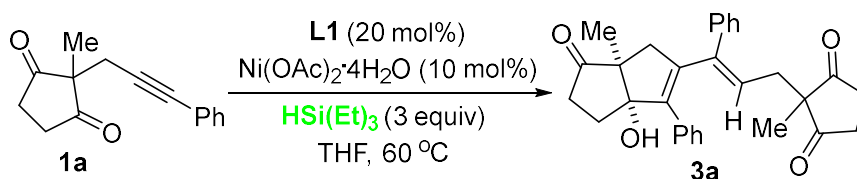

**Experimental procedure:** To a mixture of  $\text{Ni}(\text{OAc})_2 \cdot 4\text{H}_2\text{O}$  (0.01 mmol, 2.3 mg), **L1** (0.02 mmol, 7.8 mg) and dry THF (2 mL) in a sealed tube was added **1a** (0.1 mmol, 22.7 mg) and  $\text{HSi}(\text{Et})_3$  (0.3 mmol, 33.6 mg) under Argon. The reaction mixture was heated at 60 °C for 72 hours. After removal of the solvent under reduced pressure, redissolved in  $\text{CDCl}_3$  and the crude mixture analyzed by  $^1\text{H}$  NMR. The product **3a** was not detected, and **1a** was recovered.

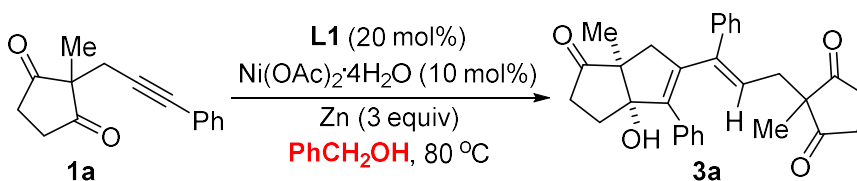

**Experimental procedure:** To a mixture of  $\text{Ni}(\text{OAc})_2 \cdot 4\text{H}_2\text{O}$  (0.01 mmol, 2.3 mg), **L1** (0.02 mmol, 7.8 mg), Zn (0.3 mmol, 19.8 mg) and dry BnOH (1 mL) in a sealed tube was added **1a** (0.1 mmol, 22.5 mg) under Argon. The reaction mixture was heated at 60 °C for 96 hours. Benzaldehyde was not observed by detection of the reaction mixture by GC using benzaldehyde as a reference. The solvent was then removed under vacuum and the residue was purified by chromatography on silica gel, eluting with ethyl acetate/petroleum ether 1:4~1:1 (v/v) to afford the desired product **3a** in 43% yield.

## 6. General procedure for the synthesis of starting materials

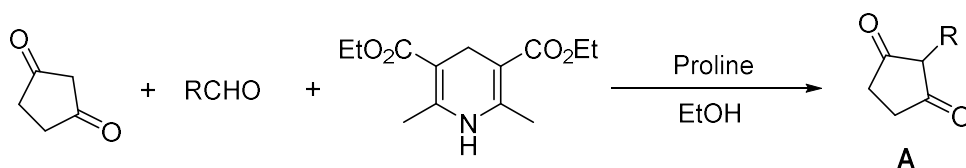

Proline (0.015 mmol) was added to the mixture of the aldehyde (0.9 mmol), 1,3-dione (0.3 mmol), Hantzsch ester (0.3 mmol) and EtOH (1 mL). The reaction mixture was stirred at 25 °C for overnight. H<sub>2</sub>O (20 mL) was added, and the mixture was extracted with EtOAc (3 × 10 mL). The combined organic phases were dried (MgSO<sub>4</sub>), filtered, and concentrated in vacuo. The residue was purified by chromatography on silica gel, eluting with ethyl acetate/petroleum ether 1:20~2:1 (v/v) to afford the products **A**.<sup>1</sup>

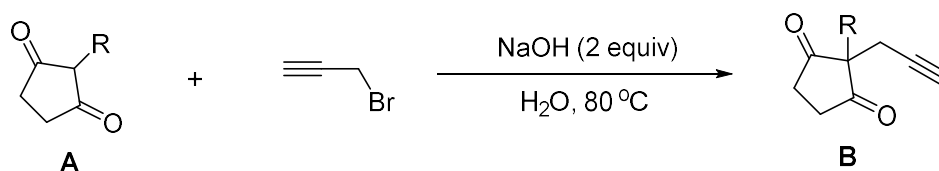

2 M aqueous NaOH (20 mmol) was added to a slurry of **A** (4 mmol) in water (10 mL). When all of the solid had dissolved, forming a bright red solution, propargyl bromide (8 mmol) was added. The mixture was stirred at 80 °C for 60 h. The mixture was cooled to room temperature, EtOAc (10 mL) was added, and the mixture was extracted with EtOAc (3 × 10 mL). The combined organic phases were dried (MgSO<sub>4</sub>), filtered, and concentrated in vacuo. The residue was purified by chromatography on silica gel, eluting with ethyl acetate/petroleum ether 1:20~2:1 (v/v) to afford the products **B**.<sup>2</sup>

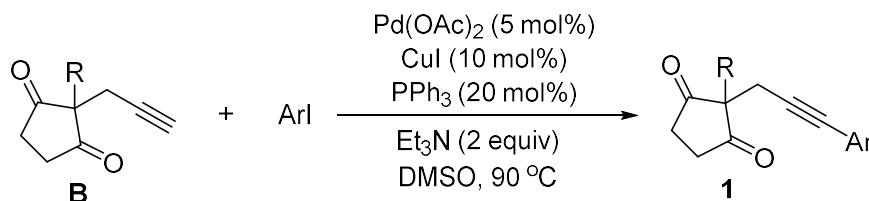

Alkyne **B** (10.0 mmol) was added to a solution of Pd(OAc)<sub>2</sub> (0.5 mmol), PPh<sub>3</sub> (2.00 mmol), CuI (1.0 mmol), and Et<sub>3</sub>N (20 mmol) in anhydrous DMSO (24 mL). A solution of arylbromide (20 mmol) in anhydrous DMSO (10 mL) was added and the mixture was stirred at 90 °C. The reaction was cooled to room temperature, water (50 mL) was added,

---

and the mixture was extracted with Et<sub>2</sub>O (50 mL). The organic phase was washed with 10% aqueous HCl (3 × 20 mL), dried (Na<sub>2</sub>SO<sub>4</sub>), filtered, and concentrated in vacuo. The residue was purified by chromatography on silica gel, eluting with ethyl acetate/petroleum ether 1:20~2:1 (v/v) to afford the alkynone products **1**.<sup>3</sup>

## 7. Characterization data of products

2-((*E*)-3-((3*aS*,6*aS*)-3*a*-Hydroxy-6*a*-methyl-6-oxo-3-phenyl-1,3*a*,4,5,6,6*a*-hexahydropentalen-2-yl)-3-phenylallyl)-2-methylcyclopentane-1,3-dione (**3a**)

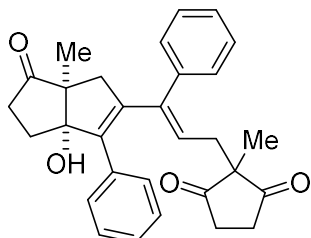

Chemical Formula: C<sub>30</sub>H<sub>30</sub>O<sub>4</sub>  
Exact Mass: 454.2144

**3a** was prepared according to general procedure 2.1 using **1a** and was purified by silica gel column chromatography (PE/EtOAc = 4/1~2/1) to obtain **3a** as white solid (87% yield). <sup>1</sup>H NMR (400 MHz, CDCl<sub>3</sub>) δ 7.25-7.09 (m, 8H), 6.89-6.81 (m, 2H), 5.36 (dd, *J* = 7.9, 6.8 Hz, 1H), 2.68 (d, *J* = 16.9 Hz, 1H), 2.57-2.46 (m, 2H), 2.44-2.36 (m, 2H), 2.30-2.17 (m, 4H), 2.08 (s, 1H), 2.06-1.97 (m, 2H), 1.88-1.78 (m, 1H), 1.09 (s, 3H), 0.83 (s, 3H); <sup>13</sup>C NMR (101 MHz, CDCl<sub>3</sub>) δ 221.7, 215.7, 215.3, 144.4, 141.2, 140.8, 137.5, 135.7, 129.0, 129.0, 128.3, 128.2, 127.3, 127.1, 126.2, 92.5, 56.6, 56.2, 44.6, 36.7, 35.1, 34.9, 34.4, 29.2, 18.4, 15.5; HRMS: (ESI) calcd for C<sub>30</sub>H<sub>31</sub>O<sub>4</sub><sup>+</sup>[M+H]<sup>+</sup> 455.2217; found 455.2222.

The enantiomeric purity was established by HPLC analysis using a chiral column: AD-H column, 30 °C, *n*-Hexane/*i*-Propanol = 80/20 as eluent, 254 nm, 1 mL/min. t<sub>R</sub> = 9 min (major), 13 min (minor).

Optical Rotation: [α]<sub>D</sub><sup>23</sup> -42.6 (c 1.36, *i*PrOH) for 95%ee.

Absolute stereochemistry was determined through X-ray crystal diffraction study of **3a**.

<色谱图> ← HPLC chromatogram

mAU

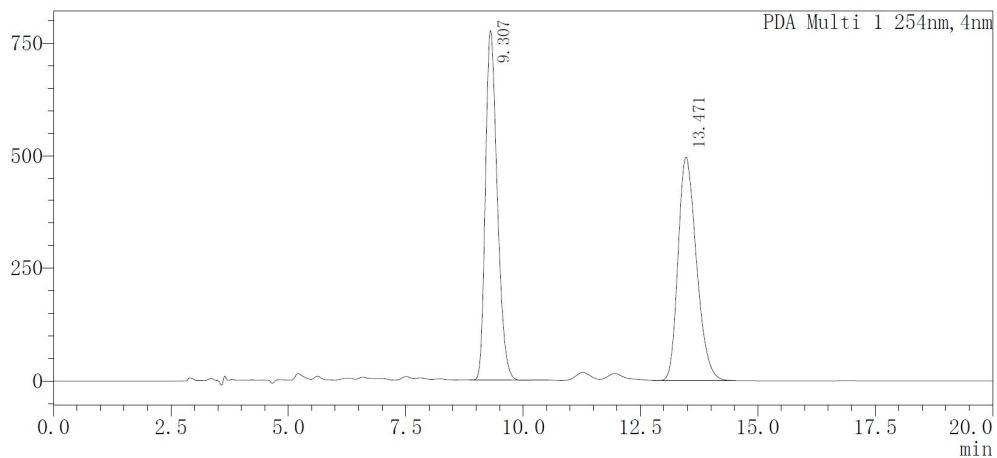

<峰表>

PDA Ch1 254nm

| 峰号 | 保留时间   | 面积       | 高度      | 浓度    | 浓度单位 | 标记 | 化合物名 |
|----|--------|----------|---------|-------|------|----|------|
| 1  | 9.307  | 13607300 | 775615  | 0.000 |      | M  |      |
| 2  | 13.471 | 13479348 | 496410  | 0.000 |      | M  |      |
| 总计 |        | 27086647 | 1272025 |       |      |    |      |

peak number

retention time

area

height

<色谱图> ← HPLC chromatogram

mAU

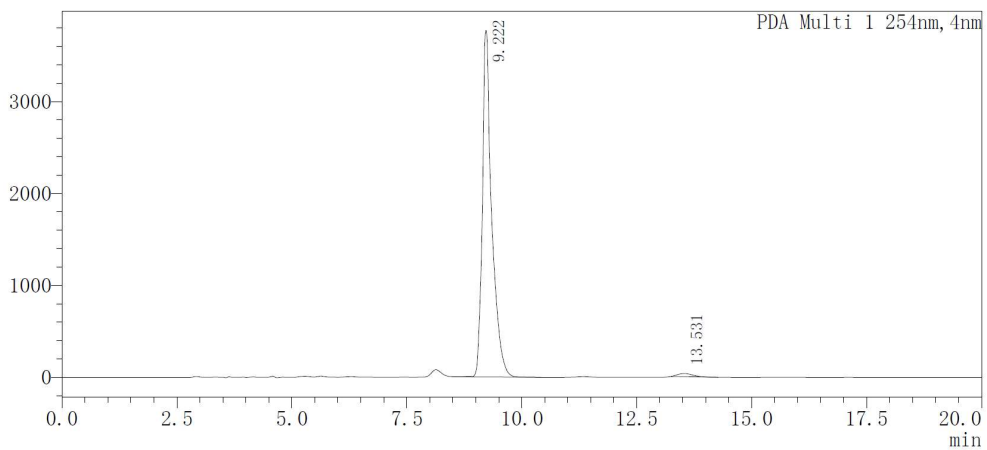

<峰表>

PDA Ch1 254nm

| 峰号 | 保留时间   | 面积       | 高度      | 浓度    | 浓度单位 | 标记 | 化合物名 |
|----|--------|----------|---------|-------|------|----|------|
| 1  | 9.222  | 53712387 | 3771947 | 0.000 |      | M  |      |
| 2  | 13.531 | 783339   | 34227   | 0.000 |      | M  |      |
| 总计 |        | 54495726 | 3806174 |       |      |    |      |

peak number

retention time

area

height

---

(*E*)-2-(2-(3a-Hydroxy-6a-methyl-6-oxo-3-phenyl-1,3a,4,5,6,6a-hexahydropentalen-2-yl)-3-phenylallyl)-2-methylcyclopentane-1,3-dione (**3a'**)

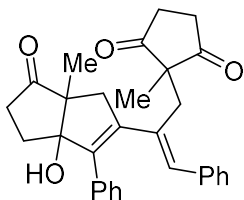

Chemical Formula: C<sub>30</sub>H<sub>30</sub>O<sub>4</sub>

Exact Mass: 454.2144

<sup>1</sup>H NMR (400 MHz, CDCl<sub>3</sub>) δ 7.56-7.50 (m, 1H), 7.48-7.29 (m, 5H), 7.26-7.20 (m, 2H), 7.14 (d, *J* = 7.4 Hz, 2H), 6.39 (s, 1H), 2.93 (d, *J* = 14.9 Hz, 1H), 2.64-2.56 (m, 2H), 2.55-2.51 (m, 1H), 2.49-2.30 (m, 7H), 2.10-2.01 (m, 1H), 1.42 (s, 1H), 1.00 (s, 3H), 0.92 (s, 3H); <sup>13</sup>C NMR (101 MHz, CDCl<sub>3</sub>) δ 221.7, 215.7, 215.3, 144.4, 141.2, 140.8, 137.5, 135.7, 129.0, 129.0, 128.3, 128.2, 127.3, 127.1, 126.2, 92.5, 56.6, 56.2, 44.6, 36.7, 35.1, 34.9, 34.4, 29.2, 18.4, 15.5; HRMS: (ESI) calcd for C<sub>30</sub>H<sub>30</sub>NaO<sub>4</sub><sup>+</sup>[M+Na]<sup>+</sup> 477.2036; found 477.2046.

2-((*E*)-3-((3*aS*,6*aS*)-3a-Hydroxy-3-(4-methoxyphenyl)-6a-methyl-6-oxo-1,3a,4,5,6,6a-hexahydropentalen-2-yl)-3-(4-methoxyphenyl)allyl)-2-methylcyclopentane-1,3-dione (**3b**)

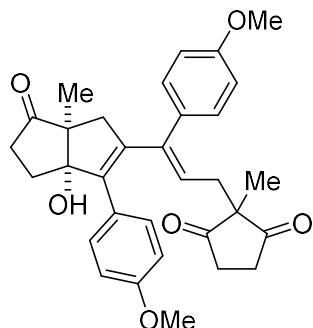

Chemical Formula: C<sub>32</sub>H<sub>34</sub>O<sub>6</sub>  
Exact Mass: 514.2355

**3b** was prepared according to general procedure 2.1 using **1b** and was purified by silica gel column chromatography (PE/EtOAc = 4/1~2/1) to obtain **3b** as white solid (56% yield). <sup>1</sup>H NMR (400 MHz, CDCl<sub>3</sub>) δ 7.09-7.04 (m, 2H), 6.80- 6.70 (m, 6H), 5.30 (dd, *J* = 8.0, 6.6 Hz, 1H), 3.77 (s, 3H), 3.76 (s, 3H), 2.66 (d, *J* = 16.9 Hz, 1H), 2.59-2.50 (m, 2H), 2.40-2.33 (m, 2H), 2.32-2.20 (m, 4H), 2.07-1.93 (m, 3H), 1.89-1.78 (m, 1H), 1.09 (s, 3H), 0.87 (s, 3H); <sup>13</sup>C NMR (101 MHz, CDCl<sub>3</sub>) δ 221.6, 215.7, 215.2, 158.6, 158.5, 144.2, 140.4, 140.2, 130.0, 129.9, 129.7, 127.7, 125.3, 113.6, 113.5, 92.3, 56.5, 56.0, 55.2, 55.1, 44.5, 36.5, 35.0, 34.8, 34.5, 29.1, 18.4, 15.4; HRMS: (ESI) calcd for C<sub>32</sub>H<sub>34</sub>NaO<sub>6</sub><sup>+</sup>[M+Na]<sup>+</sup> 537.2248; found 537.2243.

The enantiomeric purity was established by HPLC analysis using a chiral column: AD-H column, 30 °C, *n*-Hexane/*i*-Propanol = 80/20 as eluent, 254 nm, 1 mL/min. t<sub>R</sub> = 10 min (major), 11 min (minor).

Optical Rotation: [α]<sub>D</sub><sup>24</sup> -73.0 (c 1.2, <sup>t</sup>PrOH) for 84%ee.

Absolute stereochemistry was determined through analogy with **3a**.

<色谱图> ← HPLC chromatogram

mAU

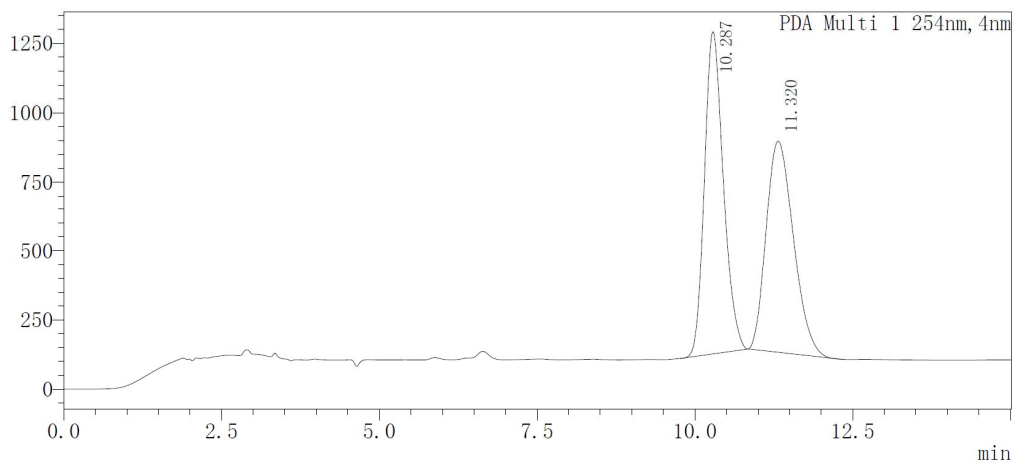

<峰表>

PDA Ch1 254nm

| 峰号 | 保留时间   | 面积       | 高度      | 浓度    | 浓度单位 | 标记 | 化合物名 |
|----|--------|----------|---------|-------|------|----|------|
| 1  | 10.287 | 24253589 | 1164050 | 0.000 |      | M  |      |
| 2  | 11.320 | 22983710 | 765021  | 0.000 |      | M  |      |
| 总计 |        | 47237299 | 1929071 |       |      |    |      |

↑ peak number

↑ retention time

↑ area

↑ height

<色谱图> ← HPLC chromatogram

mAU

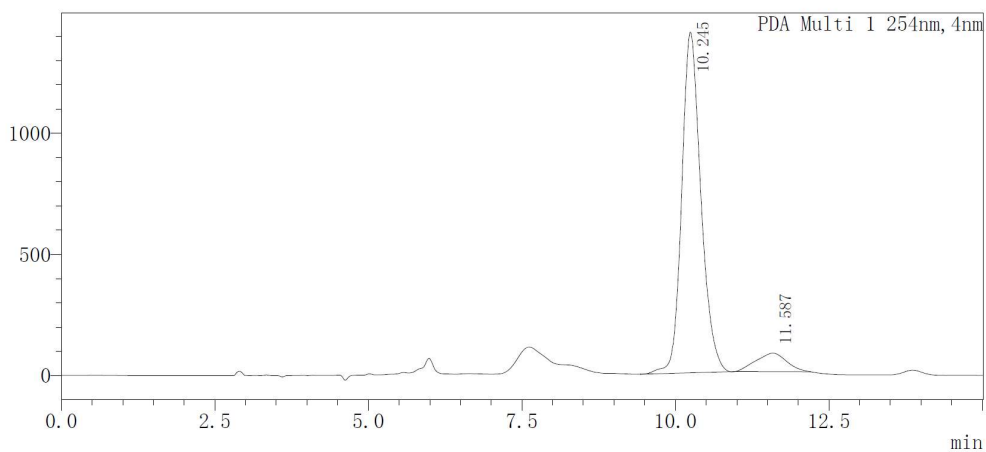

<峰表>

PDA Ch1 254nm

| 峰号 | 保留时间   | 面积       | 高度      | 浓度    | 浓度单位 | 标记 | 化合物名 |
|----|--------|----------|---------|-------|------|----|------|
| 1  | 10.245 | 30631184 | 1406810 | 0.000 |      | M  |      |
| 2  | 11.587 | 2676344  | 76472   | 0.000 |      | M  |      |
| 总计 |        | 33307528 | 1483282 |       |      |    |      |

↑ peak number

↑ retention time

↑ area

↑ height



2-((*E*)-3-(4-Fluorophenyl)-3-((3*aS*,6*aS*)-3-(4-fluorophenyl)-3a-hydroxy-6a-methyl-6-oxo-1,3a,4,5,6,6a-hexahydropentalen-2-yl)allyl)-2-methylcyclopentane-1,3-dione (**3c**)

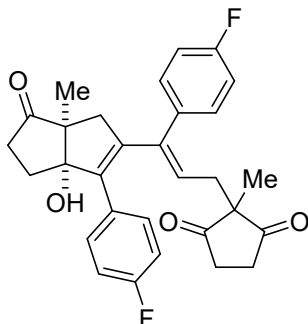

Chemical Formula: C<sub>30</sub>H<sub>28</sub>F<sub>2</sub>O<sub>4</sub>

Exact Mass: 490.1956

**3c** was prepared according to general procedure 2.1 using **1c** and was purified by silica gel column chromatography (PE/EtOAc = 4/1~2/1) to obtain **3c** as white solid (90% yield). <sup>1</sup>H NMR (400 MHz, CDCl<sub>3</sub>) δ 7.02-6.96 (m, 2H), 6.88-6.74 (m, 6H), 5.45 (t, *J* = 7.4 Hz, 1H), 2.77 (d, *J* = 16.9 Hz, 1H), 2.69-2.57 (m, 2H), 2.51-2.35 (m, 4H), 2.20 (d, *J* = 7.4 Hz, 2H), 2.03-1.92 (m, 3H), 1.88-1.79 (m, 1H), 1.12 (s, 3H), 0.90 (s, 3H); <sup>13</sup>C NMR (101 MHz, CDCl<sub>3</sub>) δ 221.2, 215.2, 214.9, 163.0 (d, *J* = 17.4 Hz), 160.5 (d, *J* = 17.6 Hz), 144.1, 140.5, 139.7, 133.3 (d, *J* = 3.5 Hz), 131.3 (d, *J* = 3.6 Hz), 130.6 (d, *J* = 8.0 Hz), 130.5 (d, *J* = 7.9 Hz), 126.9, 115.1 (d, *J* = 4.9 Hz), 114.8 (d, *J* = 4.8 Hz), 92.3, 56.4, 55.9, 44.4, 36.4, 34.9, 34.8, 34.0, 29.2, 18.3, 15.3; <sup>19</sup>F NMR (376 MHz, CDCl<sub>3</sub>) δ -114.5, -114.7; HRMS: (ESI) calcd for C<sub>30</sub>H<sub>28</sub>F<sub>2</sub>NaO<sub>4</sub><sup>+</sup>[M+Na]<sup>+</sup> 513.1848; found 513.1841.

The enantiomeric purity was established by HPLC analysis using a chiral column: AD-H column, 30 °C, *n*-Hexane/*i*-Propanol = 70/30 as eluent, 254 nm, 1 mL/min. tR = 5 min (major), 9 min (minor).

Optical Rotation: [α]<sub>D</sub><sup>25</sup> -70.5 (c 1.8, *i*PrOH) for 95%ee.

Absolute stereochemistry was determined through analogy with **3a**.

<色谱图> ← HPLC chromatogram

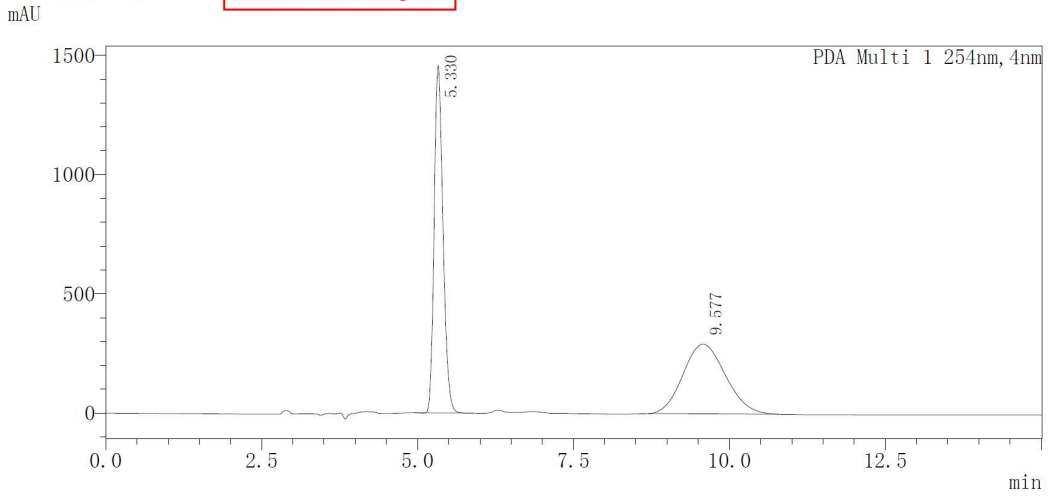

<峰表>

PDA Ch1 254nm

| 峰号 | 保留时间  | 面积       | 高度      | 浓度    | 浓度单位 | 标记 | 化合物名 |
|----|-------|----------|---------|-------|------|----|------|
| 1  | 5.330 | 14349805 | 1456259 | 0.000 |      | M  |      |
| 2  | 9.577 | 13836867 | 292006  | 0.000 |      | M  |      |
| 总计 |       | 28186672 | 1748265 |       |      |    |      |

peak number  
retention time  
area  
height

<色谱图> ← HPLC chromatogram

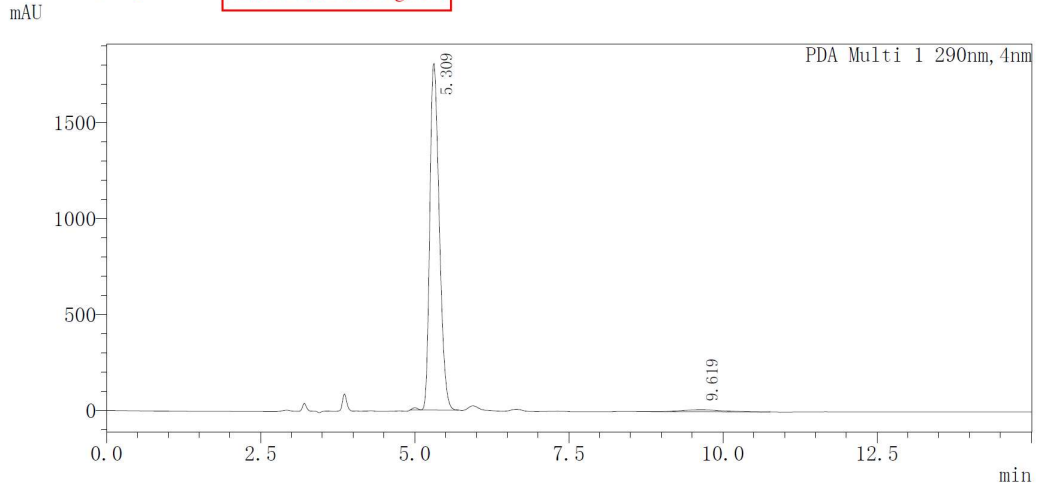

<峰表>

PDA Ch1 290nm

| 峰号 | 保留时间  | 面积       | 高度      | 浓度    | 浓度单位 | 标记 | 化合物名 |
|----|-------|----------|---------|-------|------|----|------|
| 1  | 5.309 | 19385064 | 1806934 | 0.000 |      | M  |      |
| 2  | 9.619 | 484932   | 10079   | 0.000 |      | M  |      |
| 总计 |       | 19869996 | 1817012 |       |      |    |      |

peak number  
retention time  
area  
height

2-((*E*)-3-(4-Chlorophenyl)-3-((3*aS*,6*aS*)-3-(4-chlorophenyl)-3*a*-hydroxy-6*a*-methyl-6-oxo-1,3*a*,4,5,6,6*a*-hexahydropentalen-2-yl)allyl)-2-methylcyclopentane-1,3-dione (**3d**)

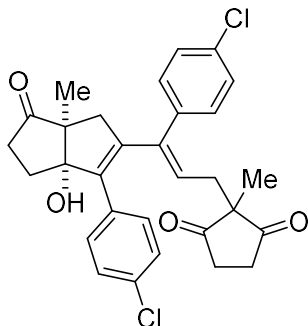

Chemical Formula: C<sub>30</sub>H<sub>28</sub>Cl<sub>2</sub>O<sub>4</sub>  
Exact Mass: 522.1365

**3d** was prepared according to general procedure 2.1 using **1d** and was purified by silica gel column chromatography (PE/EtOAc = 4/1~2/1) to obtain **3d** as white solid (79% yield). <sup>1</sup>H NMR (400 MHz, CDCl<sub>3</sub>) δ 7.45 (d, *J* = 6.9 Hz, 2H), 7.43 (d, *J* = 6.9 Hz, 2H), 7.16 (d, *J* = 8.4 Hz, 2H), 6.96 (d, *J* = 8.4 Hz, 2H), 5.58 (dd, *J* = 8.2, 6.8 Hz, 1H), 2.83 (d, *J* = 17.1 Hz, 1H), 2.77-2.67 (m, 2H), 2.55-2.40 (m, 4H), 2.24-2.12 (m, 2H), 2.03-1.84 (m, 4H), 1.14 (s, 3H), 0.92 (s, 3H); <sup>13</sup>C NMR (101 MHz, CDCl<sub>3</sub>) δ 220.4, 214.9, 214.6, 144.9, 142.1, 140.5, 138.5, 131.9, 131.7, 129.9, 129.6, 129.4, 118.4, 111.2, 110.9, 92.5, 56.2, 56.1, 44.5, 36.2, 34.9, 34.8, 33.3, 29.4, 19.1, 15.1; HRMS: (ESI) calcd for C<sub>30</sub>H<sub>29</sub>Cl<sub>2</sub>O<sub>4</sub><sup>+</sup>[M+H]<sup>+</sup> 523.1437; found 523.1434.

The enantiomeric purity was established by HPLC analysis using a chiral column: OD-H column, 30 °C, *n*-Hexane/*i*-Propanol = 93/7 as eluent, 254 nm, 1 mL/min. t<sub>R</sub> = 16 min (minor), 18 min (major).

Optical Rotation: [α]<sub>D</sub><sup>26</sup> -69.1 (c 1.7, <sup>t</sup>PrOH) for 97%ee.

Absolute stereochemistry was determined through analogy with **3a**.

<色谱图> ← HPLC chromatogram

mAU

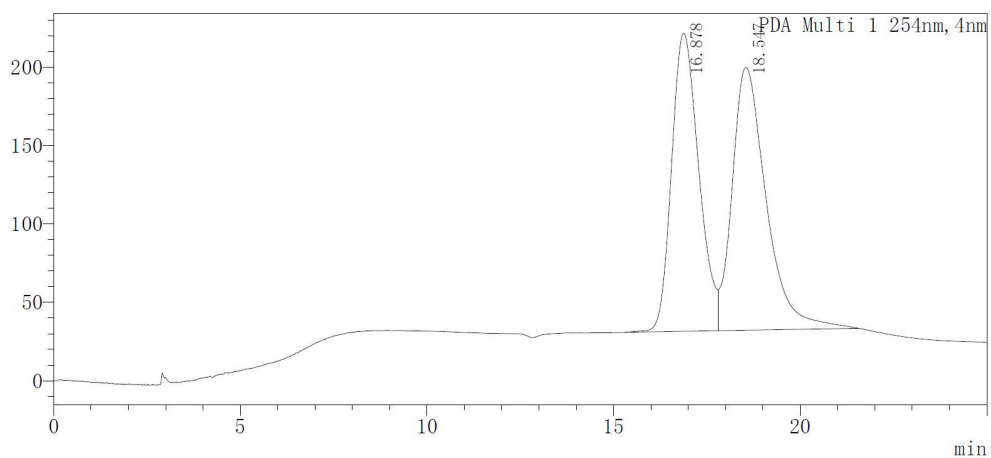

<峰表>

PDA Ch1 254nm

| 峰号 | 保留时间   | 面积       | 高度     | 浓度    | 浓度单位 | 标记  | 化合物名 |
|----|--------|----------|--------|-------|------|-----|------|
| 1  | 16.878 | 9632870  | 189945 | 0.000 |      | M   |      |
| 2  | 18.547 | 10644717 | 167593 | 0.000 |      | V M |      |
| 总计 |        | 20277587 | 357538 |       |      |     |      |

peak number

area

height

retention time

<色谱图> ← HPLC chromatogram

mAU

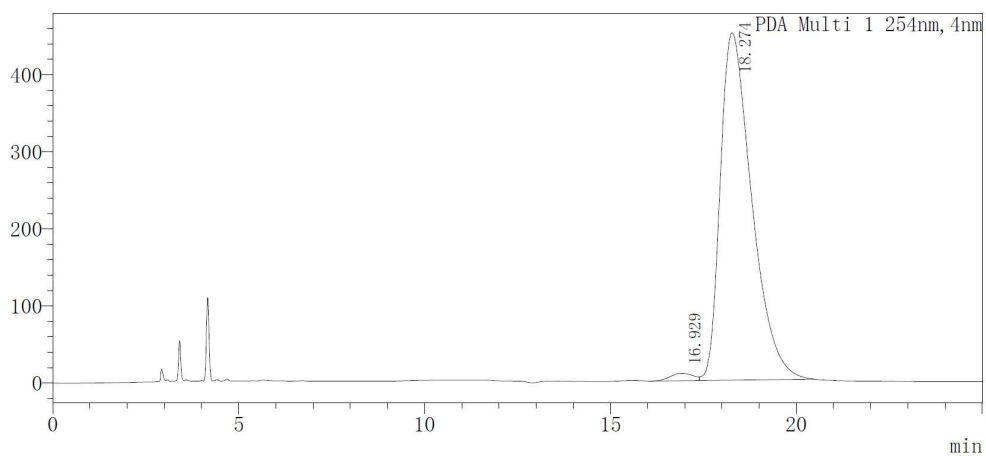

<峰表>

PDA Ch1 254nm

| 峰号 | 保留时间   | 面积       | 高度     | 浓度    | 浓度单位 | 标记  | 化合物名 |
|----|--------|----------|--------|-------|------|-----|------|
| 1  | 16.929 | 415793   | 9676   | 0.000 |      | M   |      |
| 2  | 18.274 | 26577318 | 450756 | 0.000 |      | V M |      |
| 总计 |        | 26993110 | 460432 |       |      |     |      |

peak number

area

height

retention time

4-((3*aS*,6*aS*)-2-((*E*)-1-(4-Cyanophenyl)-3-(1-methyl-2,5-dioxocyclopentyl)prop-1-en-1-yl)-6*a*-hydroxy-3*a*-methyl-4-oxo-3,3*a*,4,5,6,6*a*-hexahydropentalen-1-yl)benzonitrile (**3e**)

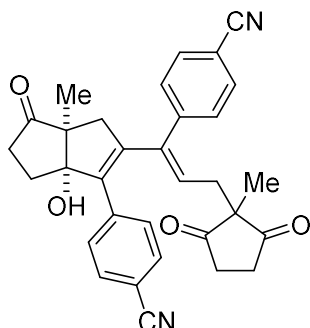

Chemical Formula: C<sub>32</sub>H<sub>28</sub>N<sub>2</sub>O<sub>4</sub>

Exact Mass: 504.2049

**3e** was prepared according to general procedure 2.1 using **1e** and was purified by silica gel column chromatography (PE/EtOAc = 4/1~2/1) to obtain **3e** as white solid (85% yield). <sup>1</sup>H NMR (400 MHz, CDCl<sub>3</sub>) δ 7.45 (d, *J* = 6.9 Hz, 2H), 7.43 (d, *J* = 6.9 Hz, 2H), 7.16 (d, *J* = 8.4 Hz, 2H), 6.96 (d, *J* = 8.4 Hz, 2H), 5.58 (dd, *J* = 8.2, 6.8 Hz, 1H), 2.83 (d, *J* = 17.1 Hz, 1H), 2.78-2.63 (m, 2H), 2.54-2.41 (m, 4H), 2.25-2.12 (m, 2H), 2.01-1.84 (m, 4H), 1.14 (s, 3H), 0.92 (s, 3H); <sup>13</sup>C NMR (101 MHz, CDCl<sub>3</sub>) δ 220.4, 214.8, 214.6, 144.9, 142.1, 140.5, 140.3, 138.5, 131.9, 131.7, 129.9, 129.6, 129.4, 118.4, 118.3, 111.2, 110.9, 92.5, 56.2, 56.1, 44.5, 36.2, 34.9, 34.8, 33.3, 29.4, 19.1, 15.1; HRMS: (ESI) calcd for C<sub>32</sub>H<sub>28</sub>N<sub>2</sub>NaO<sub>4</sub><sup>+</sup>[M+Na]<sup>+</sup> 527.1941; found 527.1930.

The enantiomeric purity was established by HPLC analysis using a chiral column: ID-H column, 30 °C, *n*-Hexane/*i*-Propanol = 60/40 as eluent, 254 nm, 1 mL/min. t<sub>R</sub> = 8 min (major), 15 min (minor).

Optical Rotation: [α]<sub>D</sub><sup>20</sup> -76.3 (c 1.7, *i*PrOH) for 93%ee.

Absolute stereochemistry was determined through analogy with **3a**.

<色谱图> ← HPLC chromatogram  
 mAU

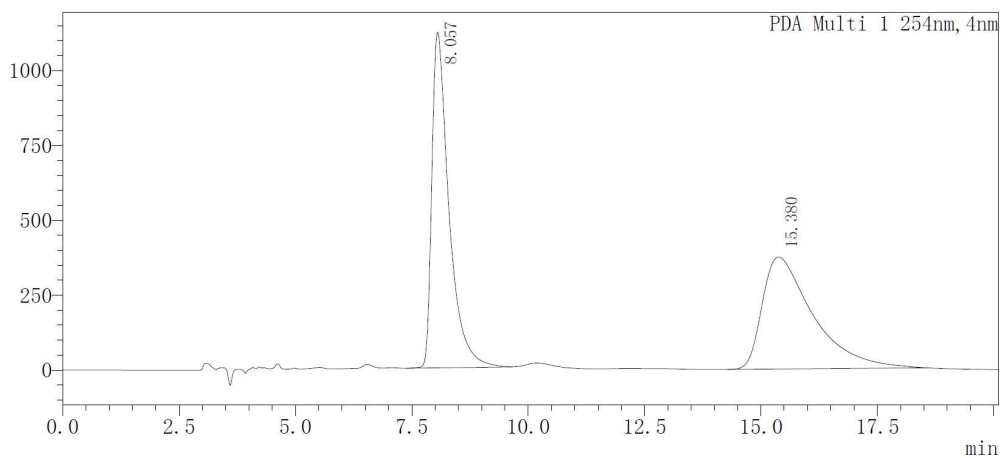

<峰表>

PDA Ch1 254nm

| 峰号 | 保留时间   | 面积       | 高度      | 浓度    | 浓度单位 | 标记 | 化合物名 |
|----|--------|----------|---------|-------|------|----|------|
| 1  | 8.057  | 28676491 | 1121665 | 0.000 |      | M  |      |
| 2  | 15.380 | 28359779 | 373879  | 0.000 |      | M  |      |
| 总计 |        | 57036270 | 1495544 |       |      |    |      |

peak number  
 retention time  
 area  
 height

<色谱图> ← HPLC chromatogram  
 mAU

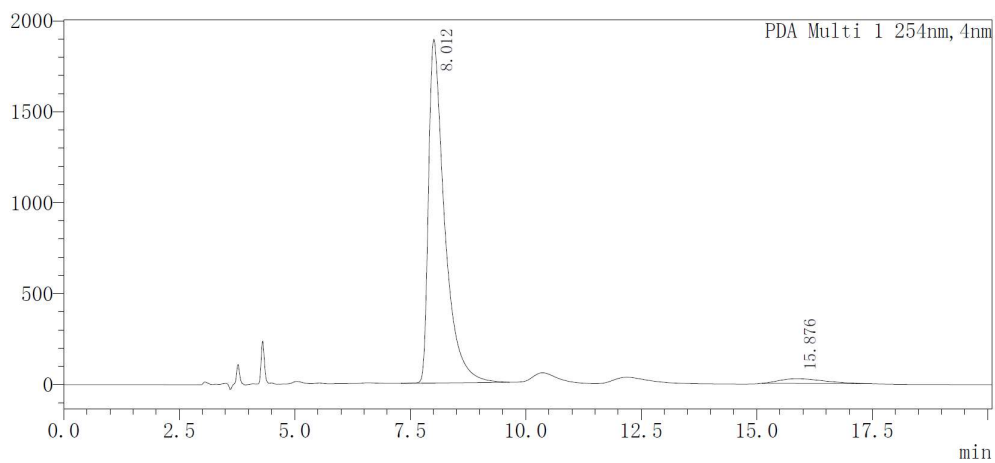

<峰表>

PDA Ch1 254nm

| 峰号 | 保留时间   | 面积       | 高度      | 浓度    | 浓度单位 | 标记 | 化合物名 |
|----|--------|----------|---------|-------|------|----|------|
| 1  | 8.012  | 45737226 | 1890703 | 0.000 |      | M  |      |
| 2  | 15.876 | 1738345  | 26028   | 0.000 |      | M  |      |
| 总计 |        | 47475571 | 1916731 |       |      |    |      |

peak number  
 retention time  
 area  
 height

2-((*E*)-3-((3*aS*,6*aS*)-3a-Hydroxy-6a-methyl-6-oxo-3-(4-(trifluoromethyl)phenyl)-1,3a,4,5,6,6a-hexahydropentalen-2-yl)-3-(4-(trifluoromethyl)phenyl)allyl)-2-methylcyclopentane-1,3-dione (**3f**)

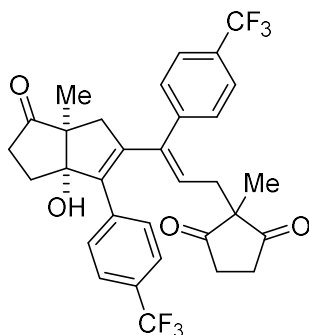

Chemical Formula: C<sub>32</sub>H<sub>28</sub>F<sub>6</sub>O<sub>4</sub>  
Exact Mass: 590.1892

**3f** was prepared according to general procedure 2.1 using **1f** and was purified by silica gel column chromatography (PE/EtOAc = 4/1~2/1) to obtain **3f** as white solid (74% yield). <sup>1</sup>H NMR (400 MHz, CDCl<sub>3</sub>) δ 7.35-7.28 (m, 4H), 7.04-6.99 (m, 2H), 6.89-6.84 (m, 2H), 5.61 (dd, *J* = 8.1, 6.7 Hz, 1H), 2.89 (d, *J* = 16.8 Hz, 1H), 2.75-2.63 (m, 2H), 2.58 (d, *J* = 16.8 Hz, 1H), 2.51-2.38 (m, 3H), 2.23-2.12 (m, 2H), 2.06-1.96 (m, 1H), 1.94-1.80 (m, 3H), 1.16 (s, 3H), 0.93 (s, 3H); <sup>13</sup>C NMR (101 MHz, CDCl<sub>3</sub>) δ 220.8, 215.0, 214.8, 144.0, 141.0, 140.9, 139.4, 139.2, 129.6, 129.3, 128.4, 124.9, 124.7, 123.9 (q, *J* = 272.1 Hz), 123.8 (q, *J* = 272.0 Hz), 92.5, 56.2, 55.8, 44.2, 36.4, 34.9, 34.8, 33.7, 29.4, 18.6, 15.3; <sup>19</sup>F NMR (376 MHz, CDCl<sub>3</sub>) δ -62.8; HRMS: (ESI) calcd for C<sub>32</sub>H<sub>29</sub>F<sub>6</sub>O<sub>4</sub><sup>+</sup>[M+H]<sup>+</sup> 591.1965; found 591.1954.

The enantiomeric purity was established by HPLC analysis using a chiral column: OD-H column, 30 °C, *n*-Hexane/*i*-Propanol = 90/10 as eluent, 254 nm, 1 mL/min. tR = 9 min (minor), 10 min (major).

Optical Rotation: [α]<sub>D</sub><sup>27</sup> -51.4 (c 1.8, *i*PrOH) for 97%ee.

Absolute stereochemistry was determined through analogy with **3a**.

<色谱图> ← HPLC chromatogram

mAU

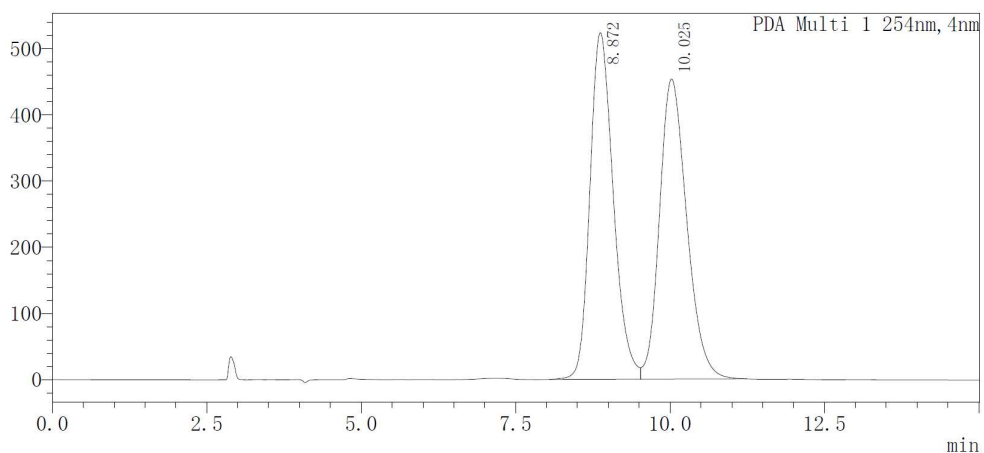

<峰表>

PDA Ch1 254nm

| 峰号 | 保留时间   | 面积       | 高度     | 浓度    | 浓度单位 | 标记  | 化合物名 |
|----|--------|----------|--------|-------|------|-----|------|
| 1  | 8.872  | 13826704 | 523928 | 0.000 |      | M   |      |
| 2  | 10.025 | 13912848 | 453619 | 0.000 |      | V M |      |
| 总计 |        | 27739552 | 977546 |       |      |     |      |

peak number

area

height

retention time

<色谱图> ← HPLC chromatogram

mAU

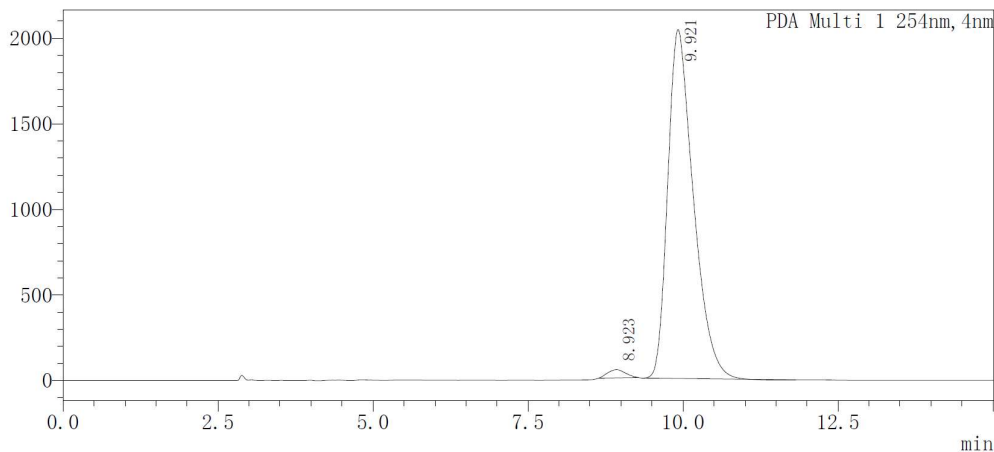

<峰表>

PDA Ch1 254nm

| 峰号 | 保留时间  | 面积       | 高度      | 浓度    | 浓度单位 | 标记 | 化合物名 |
|----|-------|----------|---------|-------|------|----|------|
| 1  | 8.923 | 954249   | 47486   | 0.000 |      | M  |      |
| 2  | 9.921 | 58622500 | 2039760 | 0.000 |      | M  |      |
| 总计 |       | 59576749 | 2087246 |       |      |    |      |

peak number

area

height

retention time



Ethyl 4-((3*aS*,6*aS*)-2-((*E*)-1-(4-(ethoxycarbonyl)phenyl)-3-(1-methyl-2,5-dioxocyclopentyl)prop-1-en-1-yl)-6a-hydroxy-3a-methyl-4-oxo-3,3a,4,5,6,6a-hexahydropentalen-1-yl)benzoate (**3g**)

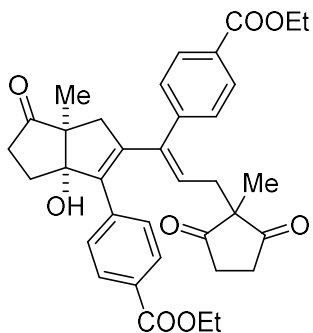

Chemical Formula: C<sub>36</sub>H<sub>38</sub>O<sub>8</sub>  
Exact Mass: 598.2567

**3g** was prepared according to general procedure 2.1 using **1g** and was purified by silica gel column chromatography (PE/EtOAc = 4/1~2/1) to obtain **3g** as white solid (58% yield). <sup>1</sup>H NMR (400 MHz, CDCl<sub>3</sub>) δ 7.83-7.75 (m, 4H), 7.15-7.10 (m, 2H), 6.92-6.86 (m, 2H), 5.50 (t, *J* = 7.5 Hz, 1H), 4.3 (qd, *J* = 7.2, 2.7 Hz, 4H), 2.78 (d, *J* = 16.9 Hz, 1H), 2.66-2.53 (m, 2H), 2.50 (d, *J* = 17.0 Hz, 1H), 2.45-2.30 (m, 2H), 2.25 (s, 1H), 2.22-2.15 (m, 2H), 2.06-1.80 (m, 3H), 1.75 (s, 1H), 1.4 (t, *J* = 7.1 Hz, 6H), 1.12 (s, 3H), 0.87 (s, 3H); <sup>13</sup>C NMR (101 MHz, CDCl<sub>3</sub>) δ 221.0, 215.1, 214.8, 166.2, 166.1, 144.3, 142.0, 141.0, 140.3, 139.7, 129.3, 129.2, 129.1, 129.0, 128.9, 128.8, 127.7, 92.4, 61.0, 60.9, 56.3, 56.0, 44.4, 36.4, 34.9, 34.7, 33.8, 29.1, 18.5, 15.2, 14.3; HRMS: (ESI) calcd for C<sub>36</sub>H<sub>39</sub>O<sub>8</sub><sup>+</sup>[M+H]<sup>+</sup> 599.2639; found 599.2629.

The enantiomeric purity was established by HPLC analysis using a chiral column: AD-H column, 30 °C, *n*-Hexane/*i*-Propanol = 80/20 as eluent, 254 nm, 1 mL/min. t<sub>R</sub> = 11 min (major), 16 min (minor).

Optical Rotation: [α]<sub>D</sub><sup>22</sup> -59.8 (c 1.4, <sup>t</sup>PrOH) for 94%ee.

Absolute stereochemistry was determined through analogy with **3a**.

<色谱图> ← HPLC chromatogram

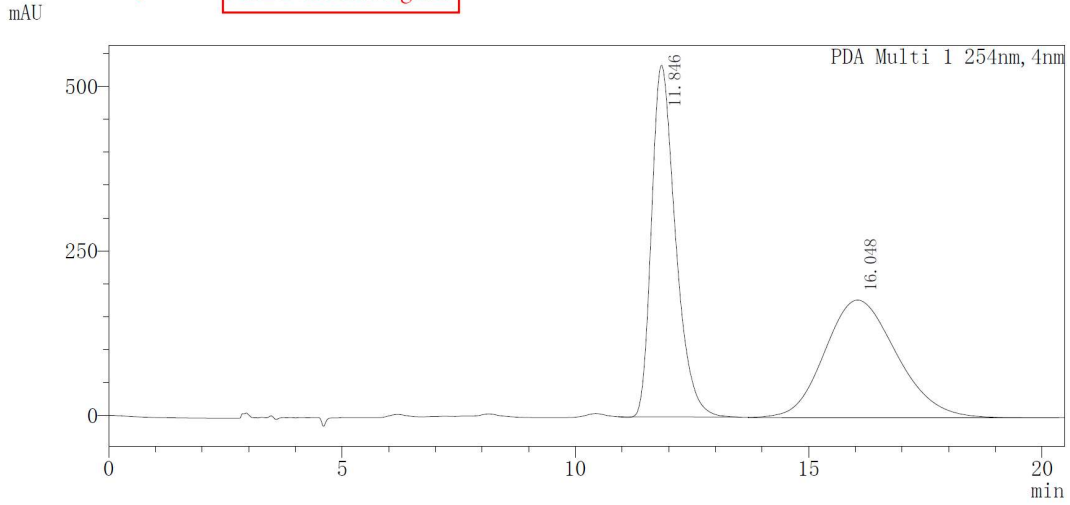

<峰表>

PDA Ch1 254nm

| 峰号 | 保留时间   | 面积       | 高度     | 浓度    | 浓度单位 | 标记 | 化合物名 |
|----|--------|----------|--------|-------|------|----|------|
| 1  | 11.846 | 19124048 | 534482 | 0.000 |      | M  |      |
| 2  | 16.048 | 19263768 | 178914 | 0.000 |      |    |      |
| 总计 |        | 38387817 | 713396 |       |      |    |      |

↑ peak number

↑ retention time

↑ area

↑ height

<色谱图> ← HPLC chromatogram

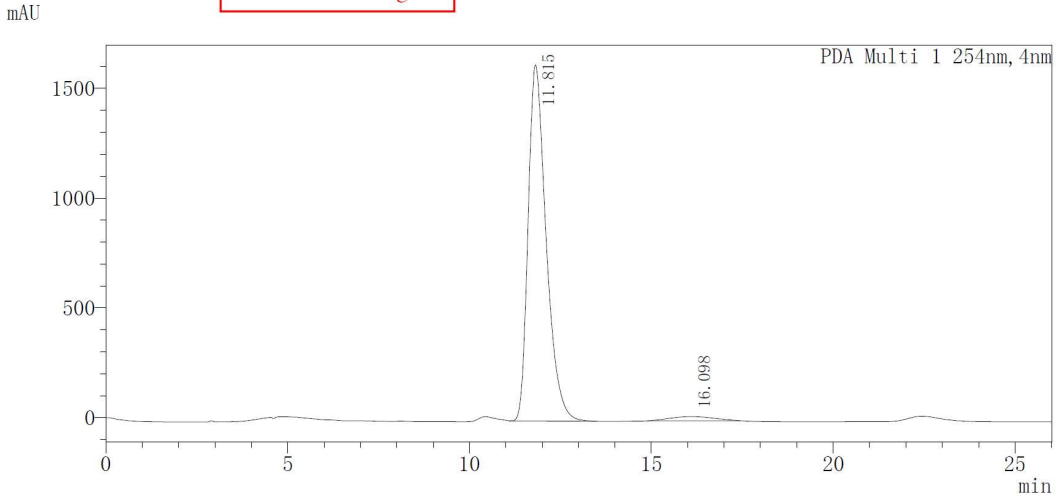

<峰表>

PDA Ch1 254nm

| 峰号 | 保留时间   | 面积       | 高度      | 浓度    | 浓度单位 | 标记 | 化合物名 |
|----|--------|----------|---------|-------|------|----|------|
| 1  | 11.815 | 55917925 | 1621917 | 0.000 |      | M  |      |
| 2  | 16.098 | 1598488  | 18945   | 0.000 |      | M  |      |
| 总计 |        | 57516413 | 1640862 |       |      |    |      |

↑ peak number

↑ retention time

↑ area

↑ height

2-((*E*)-3-((3*aS*,6*aS*)-3a-Hydroxy-3-(4-hydroxyphenyl)-6a-methyl-6-oxo-1,3a,4,5,6,6a-hexahydropentalen-2-yl)-3-(4-hydroxyphenyl)allyl)-2-methylcyclopentane-1,3-dione (**3h**)

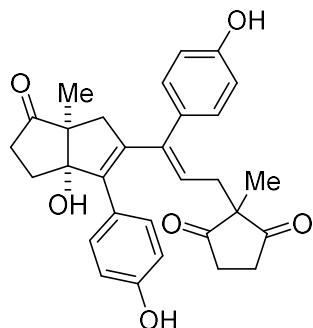

Chemical Formula: C<sub>30</sub>H<sub>30</sub>O<sub>6</sub>  
Exact Mass: 486.2042

**3h** was prepared according to general procedure 2.1 using **1h** and was purified by silica gel column chromatography (PE/EtOAc = 4/1~2/1) to obtain **3h** as white solid (45% yield). <sup>1</sup>H NMR (400 MHz, DMSO-*d*<sub>6</sub>) δ 9.41 (s, 1H), 9.26 (s, 1H), 7.06 (d, *J* = 8.6 Hz, 2H), 6.79 (d, *J* = 8.6 Hz, 2H), 6.64 (d, *J* = 8.6 Hz, 2H), 6.61 (d, *J* = 8.6 Hz, 2H), 5.23 (s, 1H), 5.17 (dd, *J* = 8.6, 5.6 Hz, 1H), 2.60-2.54 (m, 2H), 2.31-2.11 (m, 7H), 1.90-1.66 (m, 3H), 0.91 (s, 3H), 0.67 (s, 3H); <sup>13</sup>C NMR (101 MHz, DMSO-*d*<sub>6</sub>) δ 222.5, 216.8, 216.1, 156.8, 156.6, 142.8, 141.3, 139.9, 130.3, 130.1, 128.71, 127.1, 124.4, 115.3, 115.1, 91.4, 56.1, 56.0, 55.5, 36.5, 35.5, 35.1, 34.4, 29.1, 18.4, 15.8; HRMS: (ESI) calcd for C<sub>30</sub>H<sub>30</sub>NaO<sub>6</sub><sup>+</sup>[M+Na]<sup>+</sup> 509.1935; found 509.1937.

The enantiomeric purity was established by HPLC analysis using a chiral column: AD-H column, 30 °C, *n*-Hexane/*i*-Propanol = 80/20 as eluent, 254 nm, 1 mL/min. tR = 8 min (minor), 10 min (major).

Optical Rotation: [α]<sub>D</sub><sup>20</sup> -19.0 (c 0.8, <sup>t</sup>PrOH) for 92%ee.

Absolute stereochemistry was determined through analogy with **3a**.

<色谱图> ← HPLC chromatogram

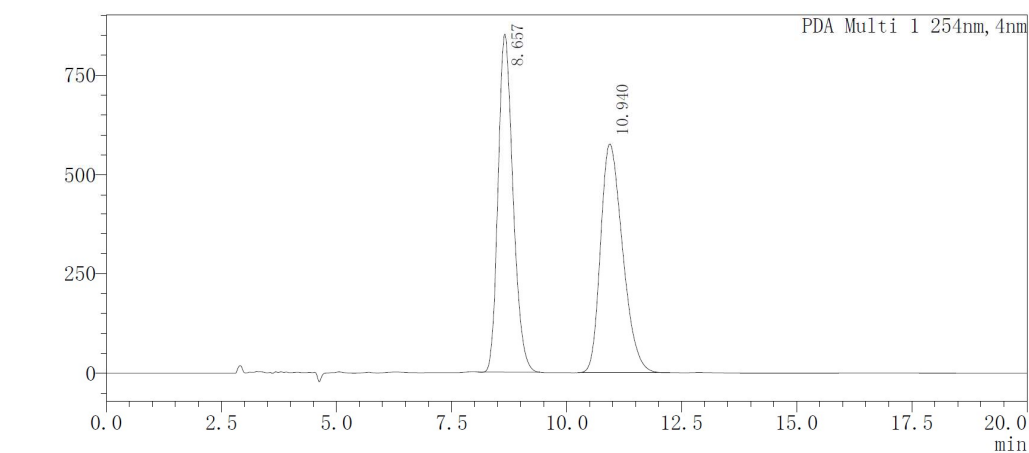

<峰表>

PDA Ch1 254nm

| 峰号 | 保留时间   | 面积       | 高度      | 浓度    | 浓度单位 | 标记 | 化合物名 |
|----|--------|----------|---------|-------|------|----|------|
| 1  | 8.657  | 19228023 | 850450  | 0.000 |      | M  |      |
| 2  | 10.940 | 19233820 | 576337  | 0.000 |      | M  |      |
| 总计 |        | 38461842 | 1426787 |       |      |    |      |

peak number

area

height

retention time

<色谱图> ← HPLC chromatogram

mAU

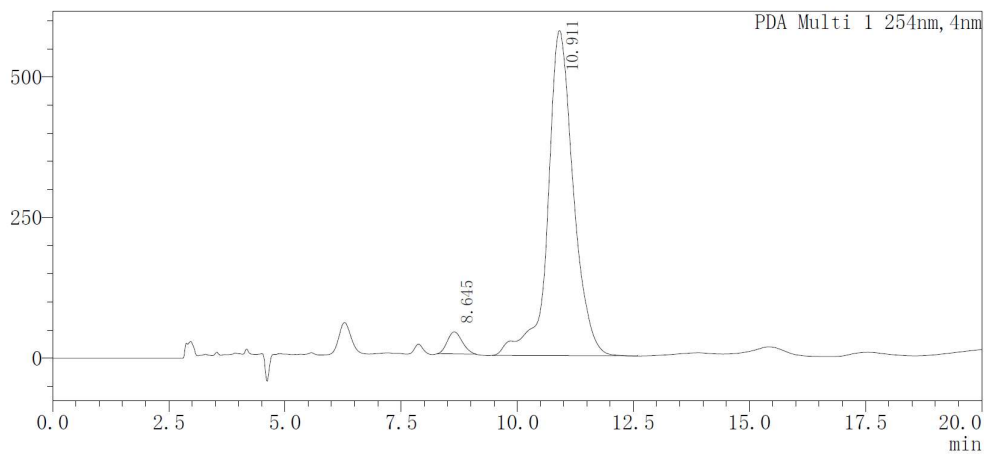

<峰表>

PDA Ch1 254nm

| 峰号 | 保留时间   | 面积       | 高度     | 浓度    | 浓度单位 | 标记 | 化合物名 |
|----|--------|----------|--------|-------|------|----|------|
| 1  | 8.645  | 877224   | 39189  | 0.000 |      | M  |      |
| 2  | 10.911 | 22299671 | 577867 | 0.000 |      | M  |      |
| 总计 |        | 23176895 | 617056 |       |      |    |      |

peak number

area

height

retention time

3-((3*aS*,6*aS*)-2-((*E*)-1-(3-Cyanophenyl)-3-(1-methyl-2,5-dioxocyclopentyl)prop-1-en-1-yl)-6a-hydroxy-3a-methyl-4-oxo-3,3a,4,5,6,6a-hexahydropentalen-1-yl)benzonitrile (**3k**)

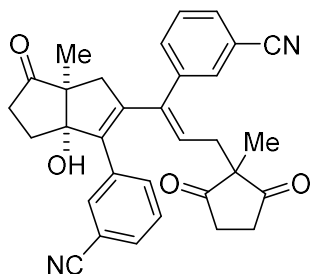

Chemical Formula: C<sub>32</sub>H<sub>28</sub>N<sub>2</sub>O<sub>4</sub>

Exact Mass: 504.2049

**3i** was prepared according to general procedure 2.1 using **1i** and was purified by silica gel column chromatography (PE/EtOAc = 4/1~2/1) to obtain **3i** as white solid (75% yield). <sup>1</sup>H NMR (400 MHz, CDCl<sub>3</sub>) δ 7.39-7.36 (m, 1H), 7.34-7.31 (m, 1H), 7.25-7.18 (m, 3H), 7.15-7.12 (m, 1H), 7.08-7.01 (m, 2H), 5.72 (dd, *J* = 8.3, 6.8 Hz, 1H), 2.96 (d, *J* = 16.8 Hz, 1H), 2.78-2.69 (m, 2H), 2.66-2.53 (m, 3H), 2.48-2.38 (m, 2H), 2.24-2.10 (m, 2H), 2.03-1.92 (m, 1H), 1.87-1.80 (m, 2H), 1.17 (s, 3H), 0.96 (s, 3H); <sup>13</sup>C NMR (101 MHz, CDCl<sub>3</sub>) δ 220.7, 214.9, 214.8, 143.7, 140.2, 138.4, 138.4, 136.7, 133.8, 133.2, 132.9, 132.5, 130.8, 130.5, 129.7, 128.8, 128.7, 118.2, 118.1, 112.0, 111.9, 92.5, 56.2, 55.6, 44.3, 36.2, 34.9, 34.9, 33.6, 29.3, 18.7, 15.3; HRMS: (ESI) calcd for C<sub>32</sub>H<sub>29</sub>N<sub>2</sub>O<sub>4</sub><sup>+</sup>[M+H]<sup>+</sup> 505.2122; found 505.2136. The enantiomeric purity was established by HPLC analysis using a chiral column: AD-H column, 30 °C, *n*-Hexane/*i*-Propanol = 80/20 as eluent, 254 nm, 1 mL/min. t<sub>R</sub> = 9 min (major), 13 min (minor).

Optical Rotation: [α]<sub>D</sub><sup>28</sup> -29.3 (c 1.5, *i*PrOH) for 96%ee.

Absolute stereochemistry was determined through analogy with **3a**.

<色谱图> ← HPLC chromatogram  
mAU

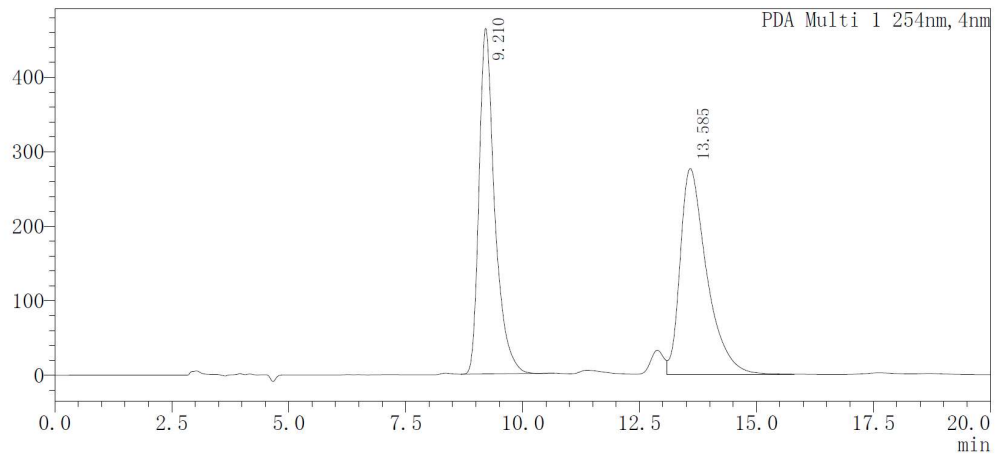

<峰表>

PDA Ch1 254nm

| 峰号 | 保留时间   | 面积       | 高度     | 浓度    | 浓度单位 | 标记 | 化合物名 |
|----|--------|----------|--------|-------|------|----|------|
| 1  | 9.210  | 10807742 | 463992 | 0.000 |      | M  |      |
| 2  | 13.585 | 10901994 | 276097 | 0.000 |      | M  |      |
| 总计 |        | 21709736 | 740089 |       |      |    |      |

peak number  
retention time  
area  
height

<色谱图> ← HPLC chromatogram  
mAU

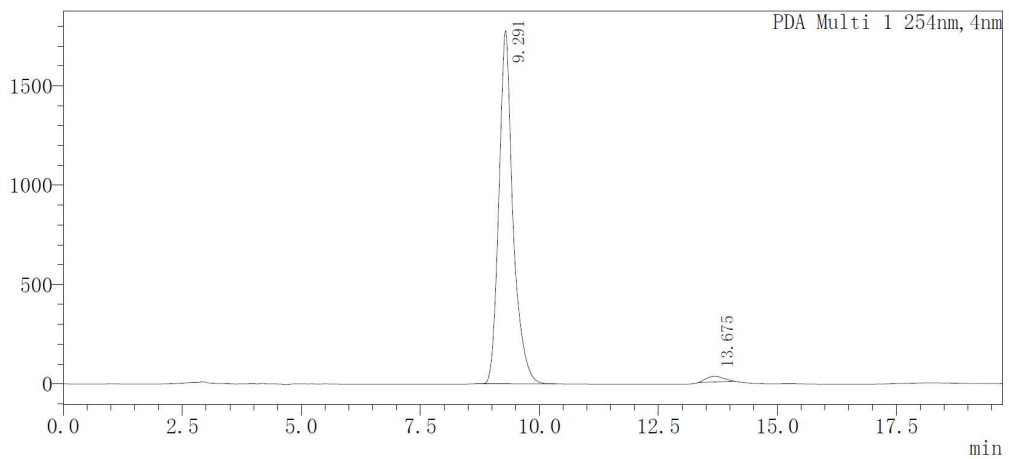

<峰表>

PDA Ch1 254nm

| 峰号 | 保留时间   | 面积       | 高度      | 浓度    | 浓度单位 | 标记 | 化合物名 |
|----|--------|----------|---------|-------|------|----|------|
| 1  | 9.291  | 36567778 | 1776984 | 0.000 |      | M  |      |
| 2  | 13.675 | 729784   | 28744   | 0.000 |      | M  |      |
| 总计 |        | 37297561 | 1805727 |       |      |    |      |

peak number  
retention time  
area  
height

2-((*E*)-3-((3*aS*,6*aS*)-3a-Hydroxy-6a-methyl-6-oxo-3-(3-(trifluoromethoxy)phenyl)-1,3a,4,5,6,6a-hexahydropentalen-2-yl)-3-(3-(trifluoromethoxy)phenyl)allyl)-2-methylcyclopentane-1,3-dione (**3j**)

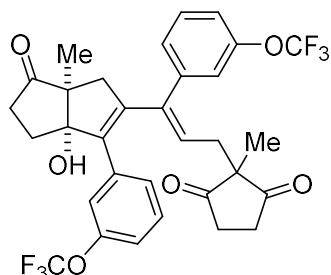

Chemical Formula: C<sub>32</sub>H<sub>28</sub>F<sub>6</sub>O<sub>6</sub>  
Exact Mass: 622.1790

**3j** was prepared according to general procedure 2.1 using **1j** and was purified by silica gel column chromatography (PE/EtOAc = 4/1~2/1) to obtain **3j** as white solid (84% yield). <sup>1</sup>H NMR (400 MHz, CDCl<sub>3</sub>) δ 7.13-7.02 (m, 2H), 6.97-6.91 (m, 1H), 6.91-6.84 (m, 2H), 6.82-6.76 (m, 1H), 6.71-6.62 (m, 2H), 5.64 (dd, *J* = 8.0, 6.9 Hz, 1H), 2.92 (d, *J* = 16.8 Hz, 1H), 2.72-2.38 (m, 6H), 2.25-2.14 (m, 2H), 2.06-1.89 (m, 3H), 1.87-1.77 (m, 1H), 1.16 (s, 3H), 0.95 (s, 3H); <sup>13</sup>C NMR (101 MHz, CDCl<sub>3</sub>) δ 220.9, 214.9, 214.8, 148.7, 148.6, 143.7, 140.7, 139.3, 139.2, 137.3, 129.3, 129.2, 128.2, 127.5, 121.7, 121.2, 119.5, 119.4, 92.5, 56.2, 55.8, 44.3, 36.3, 34.8, 33.9, 29.4, 17.9, 15.3; <sup>19</sup>F NMR (376 MHz, CDCl<sub>3</sub>) δ -57.6, -57.7; HRMS: (ESI) calcd for C<sub>32</sub>H<sub>29</sub>F<sub>6</sub>O<sub>6</sub><sup>+</sup>[M+H]<sup>+</sup> 623.1863; found 623.1848.

The enantiomeric purity was established by HPLC analysis using a chiral column: AD-H column, 30 °C, *n*-Hexane/*i*-Propanol = 80/20 as eluent, 254 nm, 1 mL/min. *t*<sub>R</sub> = 3 min (major), 4 min (minor).

Optical Rotation: [α]<sub>D</sub><sup>26</sup> -67.8 (c 1.0, *t*PrOH) for 92%ee.

Absolute stereochemistry was determined through analogy with **3a**.

<色谱图> ← HPLC chromatogram

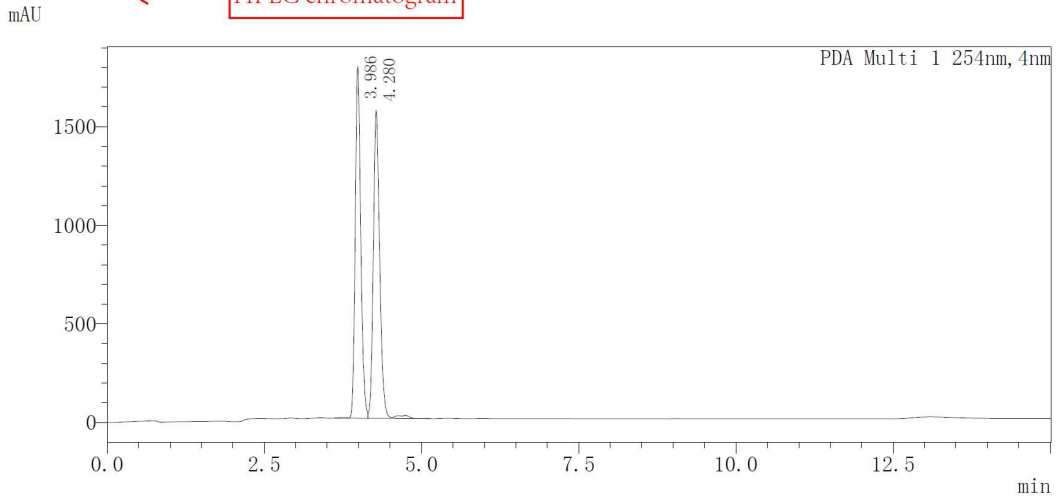

<峰表>

PDA Ch1 254nm

| 峰号 | 保留时间  | 面积       | 高度      | 浓度    | 浓度单位 | 标记  | 化合物名 |
|----|-------|----------|---------|-------|------|-----|------|
| 1  | 3.986 | 10887330 | 1783780 | 0.000 |      | M   |      |
| 2  | 4.280 | 11102728 | 1561999 | 0.000 |      | V M |      |
| 总计 |       | 21990058 | 3345780 |       |      |     |      |

peak number  
retention time  
area  
height

<色谱图> ← HPLC chromatogram

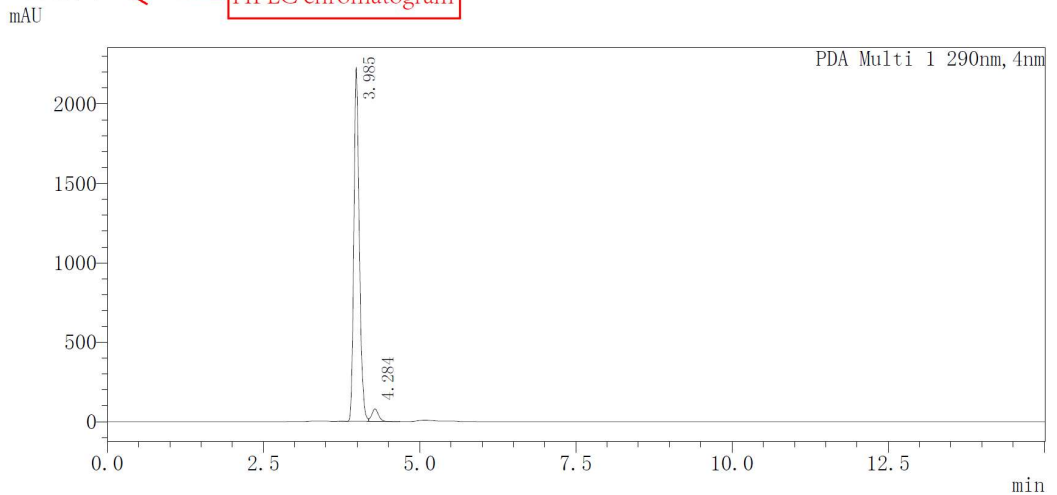

<峰表>

PDA Ch1 290nm

| 峰号 | 保留时间  | 面积       | 高度      | 浓度    | 浓度单位 | 标记  | 化合物名 |
|----|-------|----------|---------|-------|------|-----|------|
| 1  | 3.985 | 13454328 | 2229031 | 0.000 |      | M   |      |
| 2  | 4.284 | 583995   | 79223   | 0.000 |      | V M |      |
| 总计 |       | 14038323 | 2308254 |       |      |     |      |

peak number  
retention time  
area  
height



2-((*E*)-3-((3*aS*,6*aS*)-3a-Hydroxy-6a-methyl-3-(naphthalen-2-yl)-6-oxo-1,3a,4,5,6,6a-hexahydropentalen-2-yl)-3-(naphthalen-2-yl)allyl)-2-methylcyclopentane-1,3-dione (**3k**)

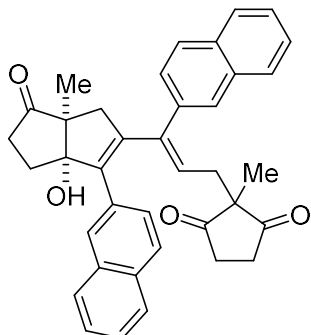

Chemical Formula: C<sub>38</sub>H<sub>34</sub>O<sub>4</sub>  
Exact Mass: 554.2457

**3k** was prepared according to general procedure 2.1 using **1k** and was purified by silica gel column chromatography (PE/EtOAc = 4/1~2/1) to obtain **3k** as white solid (62% yield). <sup>1</sup>H NMR (400 MHz, CDCl<sub>3</sub>) δ 7.70-7.58 (m, 4H), 7.56-7.53 (m, 3H), 7.42-7.35 (m, 4H), 7.31 (s, 1H), 7.22 (dd, *J* = 8.4, 1.7 Hz, 1H), 6.99 (dd, *J* = 8.4, 1.7 Hz, 1H), 5.49 (t, *J* = 7.3 Hz, 1H), 2.80 (d, *J* = 17.0 Hz, 1H), 2.51 (d, *J* = 17.0 Hz, 1H), 2.46-2.32 (m, 3H), 2.27-2.25 (m, 2H), 2.15-2.03 (m, 3H), 1.93-1.84 (m, 3H), 1.13 (s, 3H), 0.79 (s, 3H); <sup>13</sup>C NMR (101 MHz, CDCl<sub>3</sub>) δ 221.4, 215.4, 214.9, 144.4, 141.2, 140.6, 134.9, 133.0, 132.8, 132.8, 132.2, 132.1, 128.0, 127.8, 127.8, 127.7, 127.7, 127.5, 127.4, 127.3, 126.8, 126.8, 126.6, 126.0, 125.9, 125.8, 124.9, 92.5, 56.4, 56.1, 44.5, 36.6, 34.8, 34.4, 34.1, 29.2, 18.7, 15.4; HRMS: (ESI) calcd for C<sub>38</sub>H<sub>34</sub>NaO<sub>4</sub><sup>+</sup>[M+Na]<sup>+</sup> 577.2349; found 577.2343.

The enantiomeric purity was established by HPLC analysis using a chiral column: AD-H column, 30 °C, *n*-Hexane/*i*-Propanol = 80/20 as eluent, 254 nm, 1 mL/min. t<sub>R</sub> = 5 min (minor), 13 min (major).

Optical Rotation: [α]<sub>D</sub><sup>20</sup> -74.9 (c 1.4, *i*PrOH) for 94%ee.

Absolute stereochemistry was determined through analogy with **3a**.

<色谱图> ← HPLC chromatogram

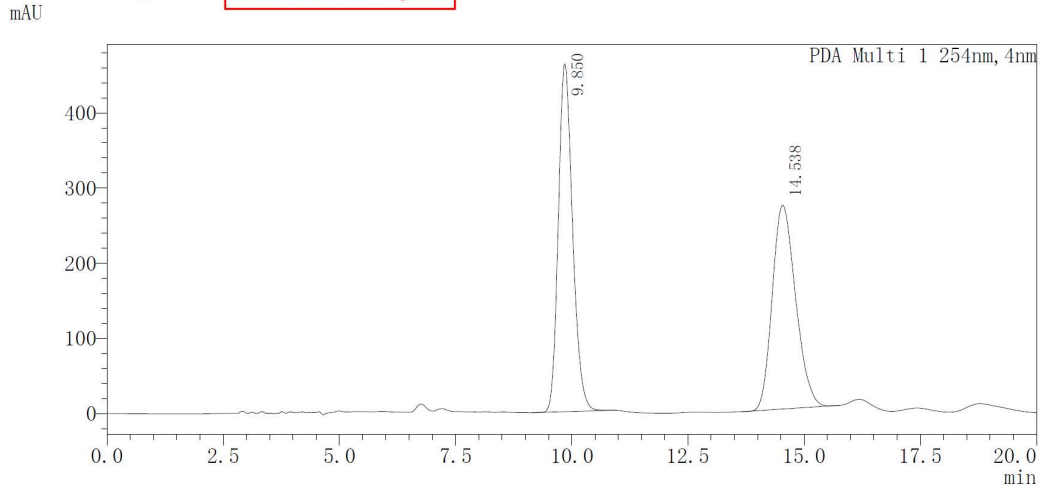

<峰表>

PDA Ch1 254nm

| 峰号 | 保留时间   | 面积       | 高度     | 浓度    | 浓度单位 | 标记 | 化合物名 |
|----|--------|----------|--------|-------|------|----|------|
| 1  | 9.850  | 9894373  | 462687 | 0.000 |      | M  |      |
| 2  | 14.538 | 9481289  | 271192 | 0.000 |      | M  |      |
| 总计 |        | 19375662 | 733879 |       |      |    |      |

↑ peak number  
↑ retention time  
↑ area  
↑ height

<色谱图> ← HPLC chromatogram

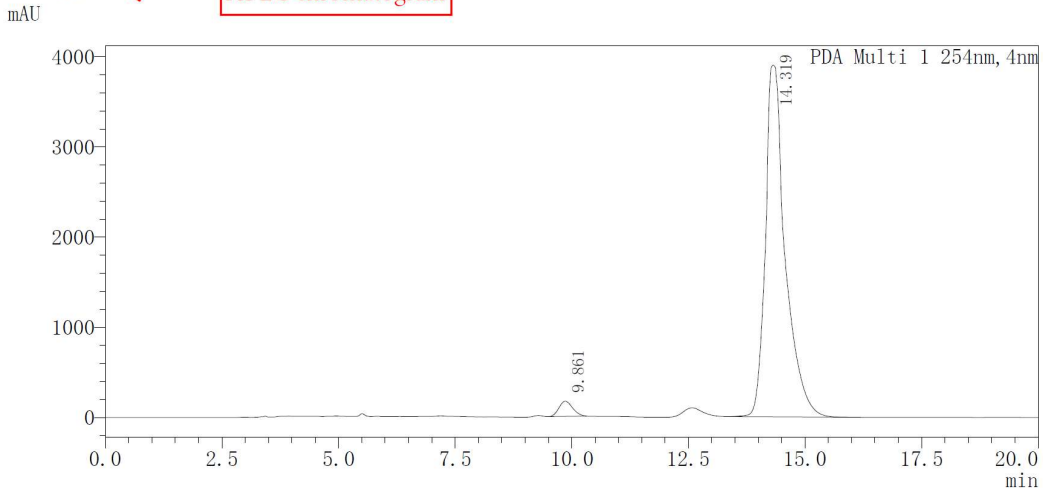

<峰表>

PDA Ch1 254nm

| 峰号 | 保留时间   | 面积        | 高度      | 浓度    | 浓度单位 | 标记 | 化合物名 |
|----|--------|-----------|---------|-------|------|----|------|
| 1  | 9.861  | 3436017   | 168705  | 0.000 |      | M  |      |
| 2  | 14.319 | 115208736 | 3899634 | 0.000 |      | M  |      |
| 总计 |        | 118644754 | 4068339 |       |      |    |      |

↑ peak number  
↑ retention time  
↑ area  
↑ height

2-((*E*)-3-(Benzo[*d*][1,3]dioxol-5-yl)-3-((3*aS*,6*aS*)-3-(benzo[*d*][1,3]dioxol-5-yl)-3*a*-hydroxy-6*a*-methyl-6-oxo-1,3*a*,4,5,6,6*a*-hexahydropentalen-2-yl)allyl)-2-methylcyclopentane-1,3-dione (**31**)

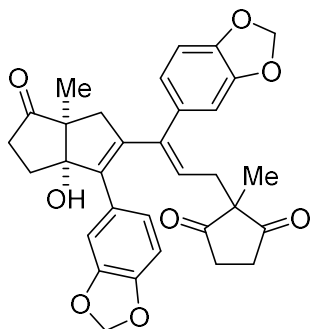

Chemical Formula: C<sub>32</sub>H<sub>30</sub>O<sub>8</sub>  
Exact Mass: 542.1941

**31** was prepared according to general procedure 2.1 using **11** and was purified by silica gel column chromatography (PE/EtOAc = 4/1~2/1) to obtain **31** as white solid (52% yield). <sup>1</sup>H NMR (400 MHz, CDCl<sub>3</sub>) δ 6.64 (d, *J* = 8.0 Hz, 1H), 6.58 (d, *J* = 7.9 Hz, 1H), 6.52 (dd, *J* = 8.0, 1.6 Hz, 1H), 6.46 (d, *J* = 1.6 Hz, 1H), 6.29-6.25 (m, 1H), 6.24-6.23 (m, 1H), 5.91-5.85 (m, 4H), 5.41 (t, *J* = 8.0 Hz, 1H), 2.73 (d, *J* = 16.8 Hz, 1H), 2.65-2.50 (m, 2H), 2.49-2.32 (m, 4H), 2.29-2.18 (m, 2H), 2.10-1.92 (m, 3H), 1.85-1.77 (m, 1H), 1.10 (s, 3H), 0.91 (s, 3H); <sup>13</sup>C NMR (101 MHz, CDCl<sub>3</sub>) δ 221.5, 215.4, 215.1, 147.0, 146.9, 146.4, 146.3, 143.6, 140.9, 140.4, 131.1, 129.2, 126.1, 122.5, 122.2, 109.5, 109.5, 107.9, 107.8, 100.9, 100.8, 92.3, 56.5, 55.8, 44.1, 36.5, 34.9, 34.8, 34.5, 29.1, 17.8, 15.4; HRMS: (ESI) calcd for C<sub>32</sub>H<sub>30</sub>NaO<sub>8</sub><sup>+</sup>[M+Na]<sup>+</sup> 565.1833; found 565.1862.

The enantiomeric purity was established by HPLC analysis using a chiral column: AD-H column, 30 °C, *n*-Hexane/*i*-Propanol = 60/40 as eluent, 254 nm, 1 mL/min. tR = 6 min (major), 9 min (minor).

Optical Rotation: [α]<sub>D</sub><sup>20</sup> -60.9 (c 1.1, *i*PrOH) for 96%ee.

Absolute stereochemistry was determined through analogy with **3a**.

<色谱图> ← HPLC chromatogram

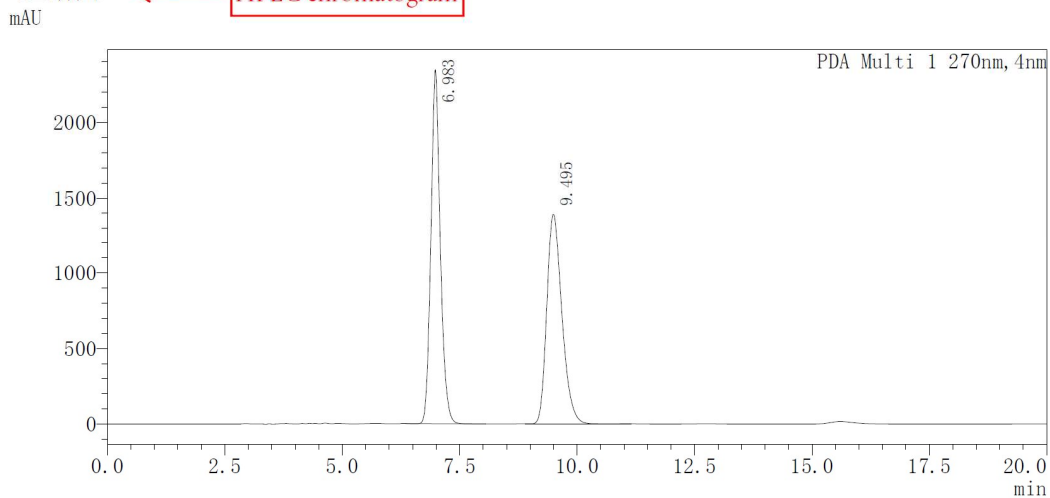

<峰表>

PDA Ch1 270nm

| 峰号 | 保留时间  | 面积       | 高度      | 浓度     | 浓度单位 | 标记 | 化合物名 |
|----|-------|----------|---------|--------|------|----|------|
| 1  | 6.983 | 32540278 | 2345065 | 51.161 |      | M  |      |
| 2  | 9.495 | 31063202 | 1391531 | 48.839 |      | M  |      |
| 总计 |       | 63603480 | 3736596 |        |      |    |      |

peak number

retention time

area

height

<色谱图> ← HPLC chromatogram

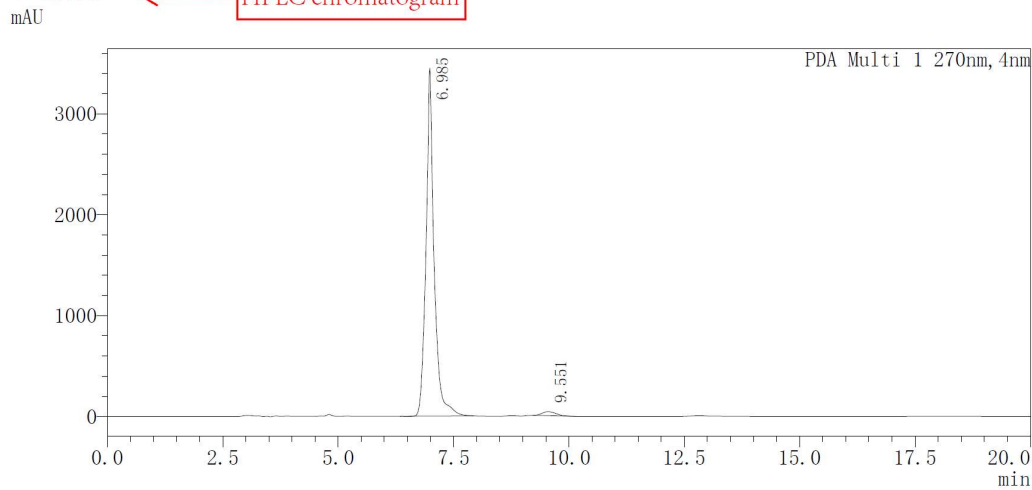

<峰表>

PDA Ch1 270nm

| 峰号 | 保留时间  | 面积       | 高度      | 浓度    | 浓度单位 | 标记 | 化合物名 |
|----|-------|----------|---------|-------|------|----|------|
| 1  | 6.985 | 41885222 | 3451102 | 0.000 |      | M  |      |
| 2  | 9.551 | 824709   | 40337   | 0.000 |      | M  |      |
| 总计 |       | 42709931 | 3491438 |       |      |    |      |

peak number

retention time

area

height

2-((*E*)-3-(2,3-Dihydrobenzo[*b*][1,4]dioxin-6-yl)-3-((3*aS*,6*aS*)-3-(2,3-dihydrobenzo[*b*][1,4]dioxin-6-yl)-3*a*-hydroxy-6*a*-methyl-6-oxo-1,3*a*,4,5,6,6*a*-hexahydropentalen-2-yl)allyl)-2-methylcyclopentane-1,3-dione (**3m**)

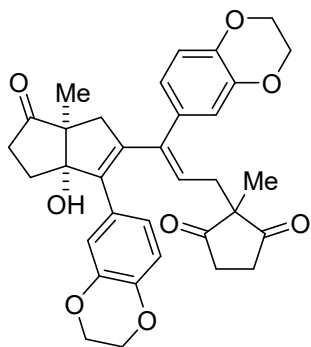

Chemical Formula: C<sub>34</sub>H<sub>34</sub>O<sub>8</sub>  
Exact Mass: 570.2254

**3m** was prepared according to general procedure 2.1 using **1m** and was purified by silica gel column chromatography (PE/EtOAc = 4/1~2/1) to obtain **3m** as white solid (50% yield). <sup>1</sup>H NMR (400 MHz, CDCl<sub>3</sub>) δ 6.67 (d, *J* = 8.3 Hz, 1H), 6.62 (d, *J* = 8.1 Hz, 1H), 6.58-6.54 (m, 1H), 6.45 (d, *J* = 2.0 Hz, 1H), 6.30-6.26 (m, 2H), 5.38 (dd, *J* = 7.8, 6.7 Hz, 1H), 4.23-4.17 (m, 8H), 2.72 (d, *J* = 16.8 Hz, 1H), 2.62-2.51 (m, 2H), 2.48-2.33 (m, 4H), 2.31-2.21 (m, 2H), 2.09-1.96 (m, 3H), 1.86-1.75 (m, 1H), 1.10 (s, 3H), 0.91 (s, 3H); <sup>13</sup>C NMR (101 MHz, CDCl<sub>3</sub>) δ 221.7, 215.5, 215.2, 143.5, 142.7, 142.7, 142.5, 142.4, 140.7, 140.3, 130.6, 128.7, 125.6, 122.2, 121.9, 118.0, 118.0, 116.6, 116.6, 92.3, 64.3, 64.2, 64.2, 64.2, 56.5, 55.8, 44.2, 36.6, 35.0, 34.9, 34.7, 29.2, 17.7, 15.4; HRMS: (ESI) calcd for C<sub>34</sub>H<sub>34</sub>NaO<sub>8</sub><sup>+</sup>[M+Na]<sup>+</sup> 593.2154; found 593.2145.

The enantiomeric purity was established by HPLC analysis using a chiral column: AD-H column, 30 °C, *n*-Hexane/*i*-Propanol = 70/30 as eluent, 254 nm, 1 mL/min. t<sub>R</sub> = 12 min (major), 18 min (minor).

Optical Rotation: [α]<sub>D</sub><sup>26</sup> -6.3 (c 0.9, *i*PrOH) for 96%ee.

Absolute stereochemistry was determined through analogy with **3a**.

<色谱图>

mAU

HPLC chromatogram

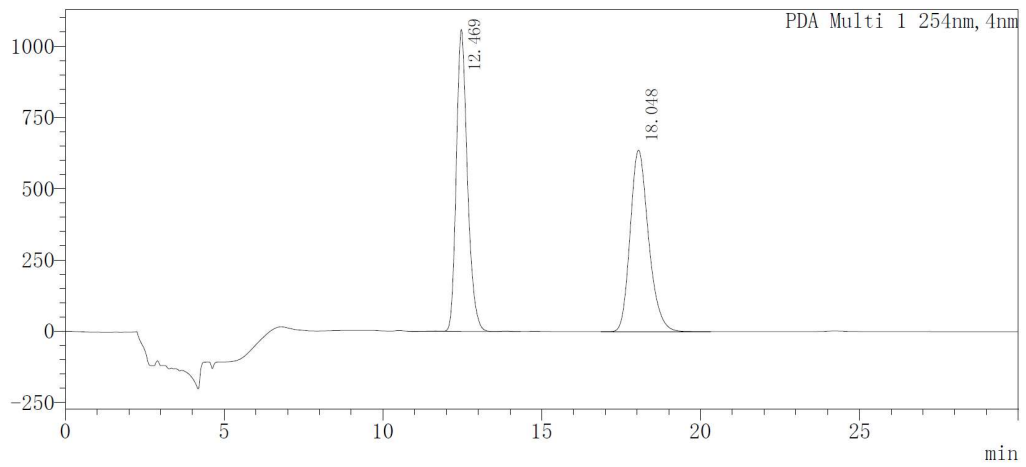

<峰表>

PDA Ch1 254nm

| 峰号 | 保留时间   | 面积       | 高度      | 浓度    | 浓度单位 | 标记 | 化合物名 |
|----|--------|----------|---------|-------|------|----|------|
| 1  | 12.469 | 25835411 | 1059887 | 0.000 |      | M  |      |
| 2  | 18.048 | 25680780 | 637119  | 0.000 |      | M  |      |
| 总计 |        | 51516191 | 1697007 |       |      |    |      |

peak number

area

height

retention time

<色谱图>

mAU

HPLC chromatogram

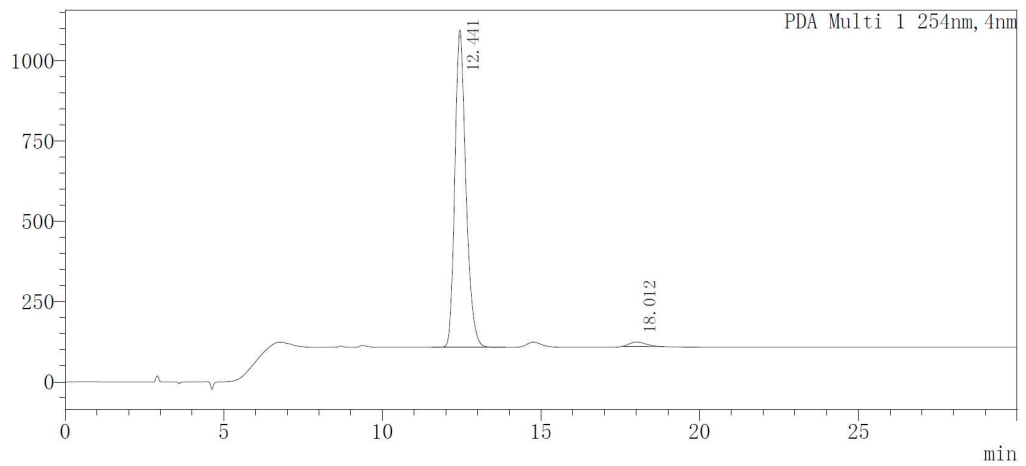

<峰表>

PDA Ch1 254nm

| 峰号 | 保留时间   | 面积       | 高度      | 浓度    | 浓度单位 | 标记 | 化合物名 |
|----|--------|----------|---------|-------|------|----|------|
| 1  | 12.441 | 23958280 | 988063  | 0.000 |      | M  |      |
| 2  | 18.012 | 496595   | 13870   | 0.000 |      | M  |      |
| 总计 |        | 24454874 | 1001933 |       |      |    |      |

peak number

area

height

retention time

2-((*Z*)-3-((3*aS*,6*aS*)-3a-Hydroxy-6a-methyl-6-oxo-3-(thiophen-3-yl)-1,3a,4,5,6,6a-hexahydropentalen-2-yl)-3-(thiophen-3-yl)allyl)-2-methylcyclopentane-1,3-dione (**3n**)

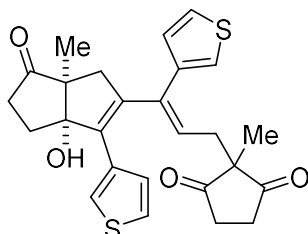

Chemical Formula: C<sub>26</sub>H<sub>26</sub>O<sub>4</sub>S<sub>2</sub>  
Exact Mass: 466.1273

**3n** was prepared according to general procedure 2.1 using **1n** and was purified by silica gel column chromatography (PE/EtOAc = 4/1~2/1) to obtain **3n** as white solid (51% yield). <sup>1</sup>H NMR (400 MHz, CDCl<sub>3</sub>) δ 7.21-7.14 (m, 3H), 6.94-6.89 (m, 2H), 6.72-6.68 (m, 1H), 5.3 (dd, *J* = 8.3, 6.3 Hz, 1H), 2.8 (d, *J* = 17.2 Hz, 1H), 2.71-2.57 (m, 2H), 2.52-2.35 (m, 6H), 2.24-2.15 (m, 1H), 2.06-1.84 (m, 3H), 1.12 (s, 3H), 0.98 (s, 3H); <sup>13</sup>C NMR (101 MHz, CDCl<sub>3</sub>) δ 221.5, 215.9, 215.4, 144.3, 137.2, 136.0, 135.6, 134.7, 128.1, 127.9, 125.6, 125.5, 124.9, 123.7, 123.0, 92.3, 56.4, 56.0, 45.1, 36.6, 35.2, 35.0, 34.6, 29.4, 18.6, 15.5; HRMS: (ESI) calcd for C<sub>26</sub>H<sub>26</sub>NaO<sub>4</sub>S<sub>2</sub><sup>+</sup>[M+Na]<sup>+</sup> 489.1165; found 489.1161.

The enantiomeric purity was established by HPLC analysis using a chiral column: AD-H column, 30 °C, *n*-Hexane/*i*-Propanol = 70/30 as eluent, 254 nm, 1 mL/min. tR = 7 min (major), 11 min (minor).

Optical Rotation: [α]<sub>D</sub><sup>26</sup> -16.2 (c 0.9, *t*PrOH) for 94%ee.

Absolute stereochemistry was determined through analogy with **3a**.

<色谱图> ← HPLC chromatogram

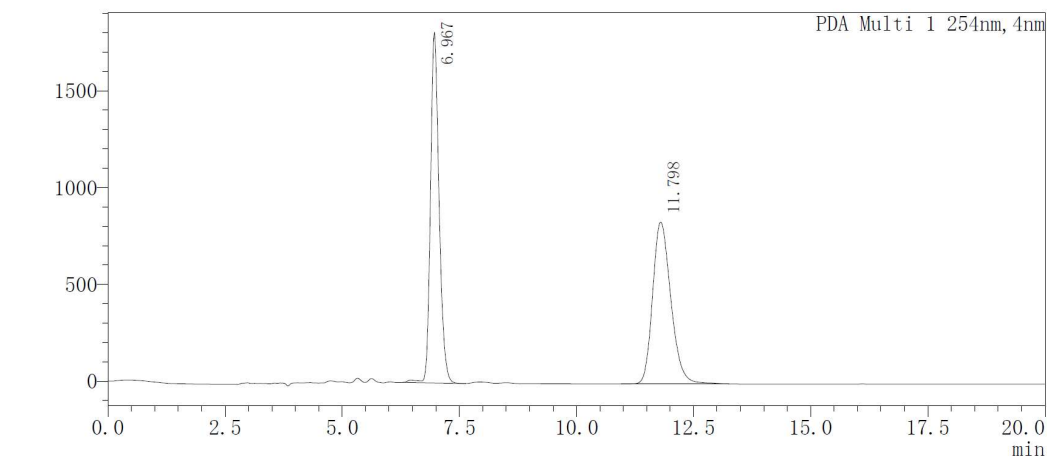

<峰表>

PDA Ch1 254nm

| 峰号 | 保留时间   | 面积       | 高度      | 浓度    | 浓度单位 | 标记 | 化合物名 |
|----|--------|----------|---------|-------|------|----|------|
| 1  | 6.967  | 23191783 | 1811832 | 0.000 |      | M  |      |
| 2  | 11.798 | 22685066 | 836385  | 0.000 |      | M  |      |
| 总计 |        | 45876849 | 2648217 |       |      |    |      |

↑ peak number

↑ area

↑ height

↑ retention time

<色谱图> ← HPLC chromatogram

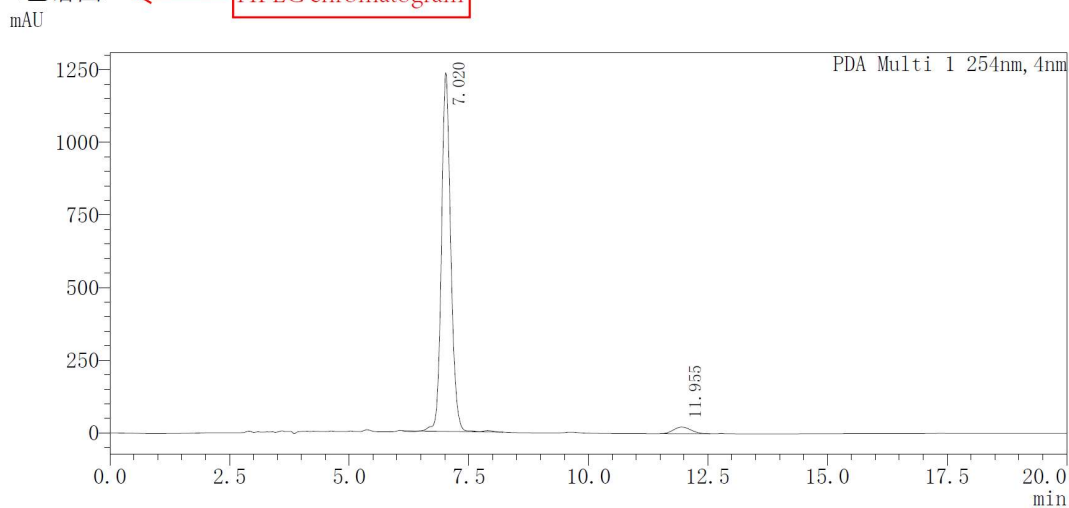

<峰表>

PDA Ch1 254nm

| 峰号 | 保留时间   | 面积       | 高度      | 浓度    | 浓度单位 | 标记 | 化合物名 |
|----|--------|----------|---------|-------|------|----|------|
| 1  | 7.020  | 16691037 | 1234560 | 0.000 |      | M  |      |
| 2  | 11.955 | 582506   | 22992   | 0.000 |      | M  |      |
| 总计 |        | 17273543 | 1257552 |       |      |    |      |

↑ peak number

↑ area

↑ height

↑ retention time



2-((*E*)-3-(Dibenzo[*b,d*]furan-2-yl)-3-((3*aS*,6*aS*)-3-(dibenzo[*b,d*]furan-2-yl)-3*a*-hydroxy-6*a*-methyl-6-oxo-1,3*a*,4,5,6,6*a*-hexahydropentalen-2-yl)allyl)-2-methylcyclopentane-1,3-dione (**3o**)

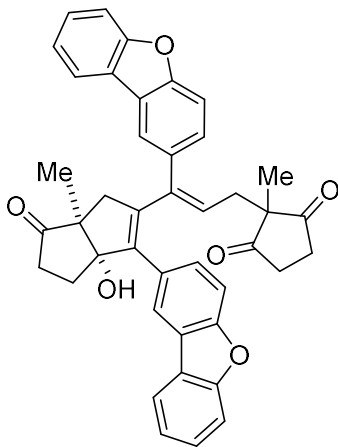

Chemical Formula: C<sub>42</sub>H<sub>34</sub>O<sub>6</sub>  
Exact Mass: 634.2355

**3o** was prepared according to general procedure 2.1 using **1o** and was purified by silica gel column chromatography (PE/EtOAc = 4/1~2/1) to obtain **3o** as white solid (75% yield). <sup>1</sup>H NMR (400 MHz, CDCl<sub>3</sub>) δ 7.69-7.64 (m, 1H), 7.63-7.59 (m, 1H), 7.39-7.30 (m, 5H), 7.24-7.13 (m, 5H), 7.08-7.02 (m, 1H), 6.86-6.80 (m, 1H), 5.66 (t, *J* = 7.5 Hz, 1H), 2.95 (d, *J* = 16.7 Hz, 1H), 2.66 (d, *J* = 16.7 Hz, 1H), 2.58-2.39 (m, 3H), 2.37-2.27 (m, 2H), 2.23 (d, *J* = 7.5 Hz, 2H), 2.18-2.08 (m, 2H), 2.08-1.97 (m, 1H), 1.89-1.79 (m, 1H), 1.20 (s, 3H), 0.90 (s, 3H); <sup>13</sup>C NMR (101 MHz, CDCl<sub>3</sub>) δ 221.5, 215.1, 215.0, 156.0, 156.0, 154.8, 154.7, 143.8, 141.6, 141.2, 132.0, 130.0, 127.9, 127.6, 127.0, 127.0, 126.6, 123.6, 123.6, 123.3, 123.3, 122.5, 122.5, 121.3, 121.1, 120.4, 120.2, 111.3, 111.3, 110.8, 110.7, 92.5, 56.5, 55.7, 44.3, 36.6, 34.8, 34.7, 34.5, 29.3, 17.7, 15.5; HRMS: (ESI) calcd for C<sub>42</sub>H<sub>34</sub>NaO<sub>6</sub><sup>+</sup>[M+Na]<sup>+</sup> 657.2248; found 657.2252.

The enantiomeric purity was established by HPLC analysis using a chiral column: AD-H column, 30 °C, *n*-Hexane/*i*-Propanol = 70/30 as eluent, 254 nm, 1 mL/min. t<sub>R</sub> = 8 min (minor), 10 min (major).

Optical Rotation: [α]<sub>D</sub><sup>26</sup> -7.9 (c 1.9, *i*PrOH) for 97%ee.

Absolute stereochemistry was determined through analogy with **3a**.

<色谱图>

mAU

HPLC chromatogram

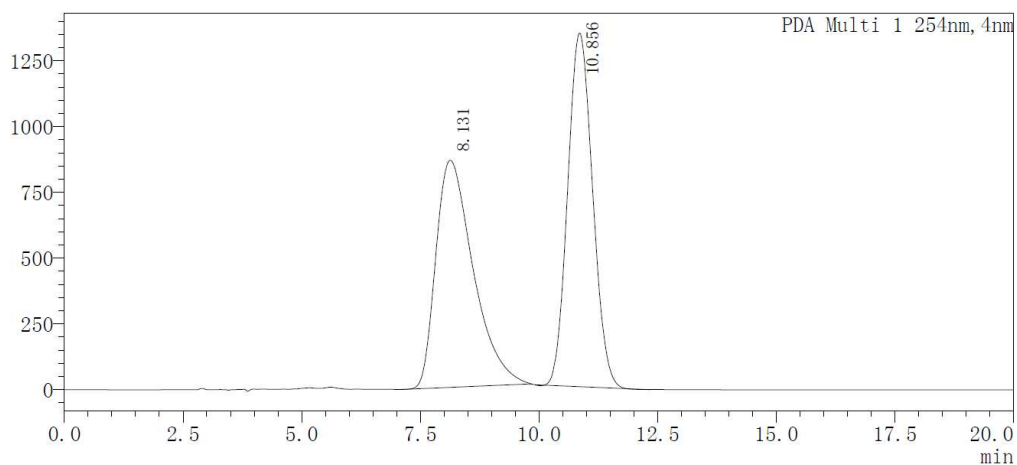

<峰表>

PDA Ch1 254nm

| 峰号 | 保留时间   | 面积       | 高度      | 浓度    | 浓度单位 | 标记 | 化合物名 |
|----|--------|----------|---------|-------|------|----|------|
| 1  | 8.131  | 47267895 | 863269  | 0.000 |      | M  |      |
| 2  | 10.856 | 49118107 | 1343756 | 0.000 |      | M  |      |
| 总计 |        | 96386002 | 2207025 |       |      |    |      |

peak number

retention time

area

height

<色谱图>

mAU

HPLC chromatogram

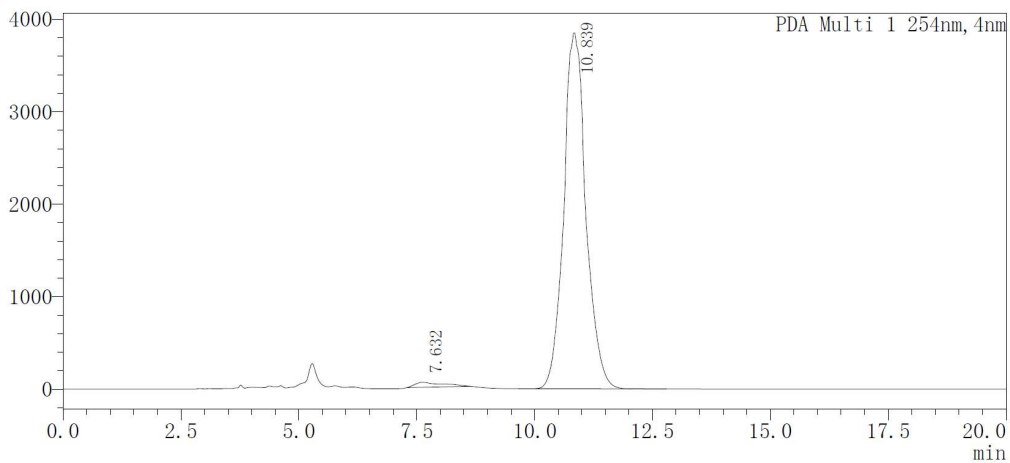

<峰表>

PDA Ch1 254nm

| 峰号 | 保留时间   | 面积        | 高度      | 浓度    | 浓度单位 | 标记 | 化合物名 |
|----|--------|-----------|---------|-------|------|----|------|
| 1  | 7.632  | 2229381   | 54405   | 0.000 |      | M  |      |
| 2  | 10.839 | 126248076 | 3850333 | 0.000 |      | M  |      |
| 总计 |        | 128477457 | 3904738 |       |      |    |      |

peak number

retention time

area

height

2-((*E*)-3-(Dibenzo[*b,d*]thiophen-2-yl)-3-((3*aS*,6*aS*)-3-(dibenzo[*b,d*]thiophen-2-yl)-3*a*-hydroxy-6*a*-methyl-6-oxo-1,3*a*,4,5,6,6*a*-hexahydropentalen-2-yl)allyl)-2-methylcyclopentane-1,3-dione (**3p**)

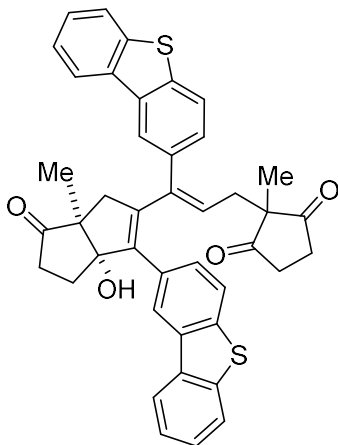

Chemical Formula: C<sub>42</sub>H<sub>34</sub>O<sub>4</sub>S<sub>2</sub>

Exact Mass: 666.1899

**3p** was prepared according to general procedure 2.1 using **1p** and was purified by silica gel column chromatography (PE/EtOAc = 4/1~2/1) to obtain **3p** as white solid (81% yield). <sup>1</sup>H NMR (400 MHz, CDCl<sub>3</sub>) δ 7.78 (d, *J* = 7.9 Hz, 1H), 7.75 (d, *J* = 7.9 Hz, 1H), 7.68-7.64 (m, 1H), 7.64-7.60 (m, 1H), 7.48 (d, *J* = 1.2 Hz, 1H), 7.41 (d, *J* = 1.2 Hz, 1H), 7.38-7.28 (m, 4H), 7.26-7.17 (m, 2H), 7.01 (dd, *J* = 8.2, 1.6 Hz, 1H), 6.82 (dd, *J* = 8.2, 1.6 Hz, 1H), 5.70 (t, *J* = 7.5 Hz, 1H), 3.03 (d, *J* = 16.6 Hz, 1H), 2.72 (d, *J* = 16.6 Hz, 1H), 2.56-2.38 (m, 3H), 2.36-2.22 (m, 5H), 2.18-1.96 (m, 2H), 1.90-1.78 (m, 1H), 1.21 (s, 3H), 0.94 (s, 3H); <sup>13</sup>C NMR (101 MHz, CDCl<sub>3</sub>) δ 221.6, 215.2, 215.0, 143.4, 143.4, 141.8, 141.2, 139.4, 139.4, 137.9, 137.7, 134.7, 134.7, 134.6, 134.6, 134.5, 133.4, 131.5, 127.4, 126.8, 126.5, 126.4, 124.0, 124.0, 122.4, 122.2, 121.9, 121.9, 121.7, 121.3, 121.2, 92.5, 56.6, 55.7, 44.1, 36.5, 34.9, 34.7, 34.5, 29.3, 17.8, 15.4; HRMS: (ESI) calcd for C<sub>42</sub>H<sub>35</sub>O<sub>4</sub>S<sub>2</sub><sup>+</sup>[M+H]<sup>+</sup> 667.1971; found 667.1969.

The enantiomeric purity was established by HPLC analysis using a chiral column: AD-H column, 30 °C, *n*-Hexane/*i*-Propanol = 70/30 as eluent, 254 nm, 1 mL/min. t<sub>R</sub> = 7 min (minor), 12 min (major).

Optical Rotation: [α]<sub>D</sub><sup>20</sup> 27.8 (c 2.2, *i*PrOH) for 95%ee.

Absolute stereochemistry was determined through analogy with **3a**.

<色谱图> ← HPLC chromatogram

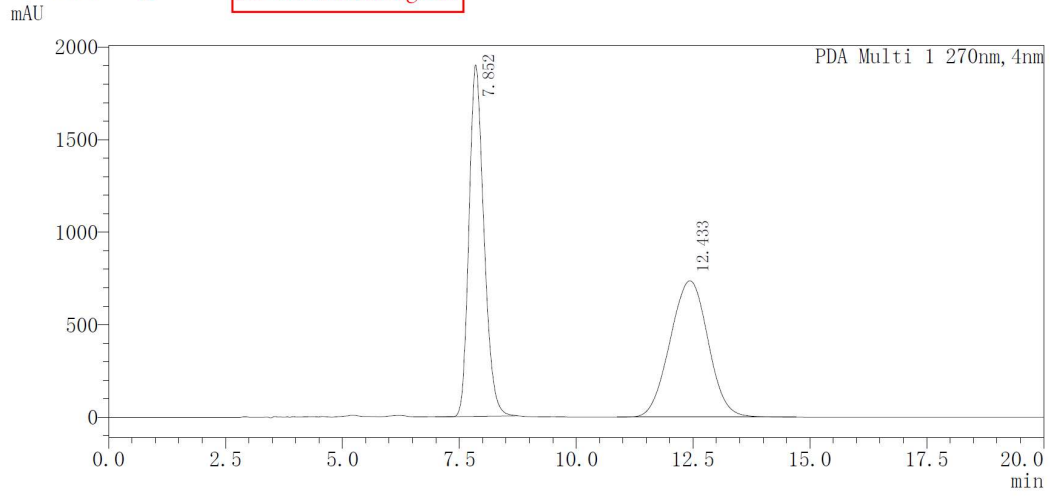

<峰表>

PDA Ch1 270nm

| 峰号 | 保留时间   | 面积       | 高度      | 浓度    | 浓度单位 | 标记 | 化合物名 |
|----|--------|----------|---------|-------|------|----|------|
| 1  | 7.852  | 42148759 | 1898751 | 0.000 |      | M  |      |
| 2  | 12.433 | 41793874 | 736581  | 0.000 |      | M  |      |
| 总计 |        | 83942633 | 2635332 |       |      |    |      |

peak number  
retention time  
area  
height

<色谱图> ← HPLC chromatogram

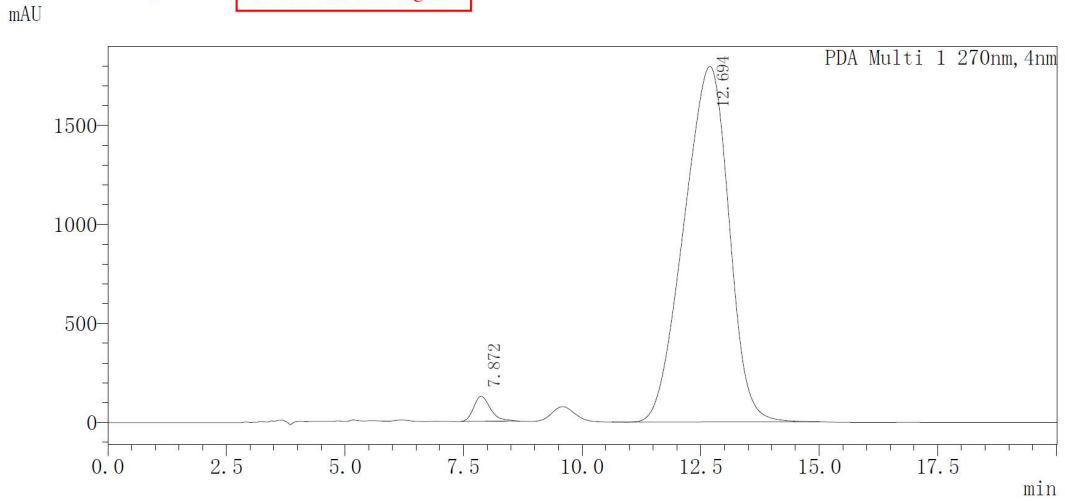

<峰表>

PDA Ch1 270nm

| 峰号 | 保留时间   | 面积        | 高度      | 浓度    | 浓度单位 | 标记 | 化合物名 |
|----|--------|-----------|---------|-------|------|----|------|
| 1  | 7.872  | 3077010   | 126193  | 0.000 |      | M  |      |
| 2  | 12.694 | 118459233 | 1796003 | 0.000 |      | M  |      |
| 总计 |        | 121536243 | 1922197 |       |      |    |      |

peak number  
retention time  
area  
height

2-((*E*)-3-((3*aS*,6*aS*)-3a-Hydroxy-3-(2-methoxypyridin-4-yl)-6a-methyl-6-oxo-1,3a,4,5,6,6a-hexahydropentalen-2-yl)-3-(2-methoxypyridin-4-yl)allyl)-2-methylcyclopentane-1,3-dione (**3q**)

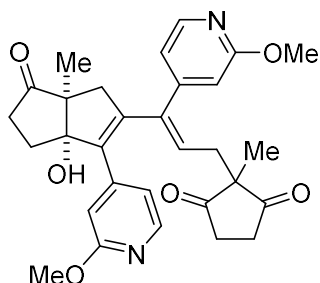

Chemical Formula: C<sub>30</sub>H<sub>32</sub>N<sub>2</sub>O<sub>6</sub>  
Exact Mass: 516.2260

**3q** was prepared according to general procedure 2.1 using **1q** and was purified by silica gel column chromatography (PE/EtOAc = 4/1~2/1) to obtain **3q** as white solid (34% yield). <sup>1</sup>H NMR (400 MHz, CDCl<sub>3</sub>) δ 7.70-7.65 (m, 1H), 7.59-7.55 (m, 1H), 7.24-7.19 (m, 1H), 7.01-6.93 (m, 1H), 6.52-6.48 (m, 1H), 6.47-6.42 (m, 1H), 5.6 (t, *J* = 7.5 Hz, 1H), 3.85 (s, 3H), 3.84 (s, 3H), 2.86 (d, *J* = 16.8 Hz, 1H), 2.71-2.60 (m, 2H), 2.58-2.46 (m, 3H), 2.45-2.35 (m, 1H), 2.25 (s, 1H), 2.23 (s, 1H), 2.04-1.91 (m, 2H), 1.88-1.77 (m, 2H), 1.14 (s, 3H), 0.95 (s, 3H); <sup>13</sup>C NMR (101 MHz, CDCl<sub>3</sub>) δ 221.2, 215.1, 214.9, 162.9, 162.9, 146.8, 146.5, 144.4, 139.2, 138.8, 138.5, 137.3, 128.2, 126.0, 110.2, 110.0, 92.3, 56.4, 55.6, 53.4, 53.4, 44.3, 36.3, 34.9, 34.8, 33.9, 29.3, 18.4, 15.4; HRMS: (ESI) calcd for C<sub>30</sub>H<sub>33</sub>N<sub>2</sub>O<sub>6</sub><sup>+</sup>[M+H]<sup>+</sup> 517.2333; found 517.2333.

The enantiomeric purity was established by HPLC analysis using a chiral column: AD-H column, 30 °C, *n*-Hexane/*i*-Propanol = 70/30 as eluent, 254 nm, 1 mL/min. t<sub>R</sub> = 10 min (minor), 11 min (major).

Optical Rotation: [α]<sub>D</sub><sup>27</sup> -41.9 (c 0.7, *i*PrOH) for 92%ee.

Absolute stereochemistry was determined through analogy with **3a**.

<色谱图> ← HPLC chromatogram

mAU

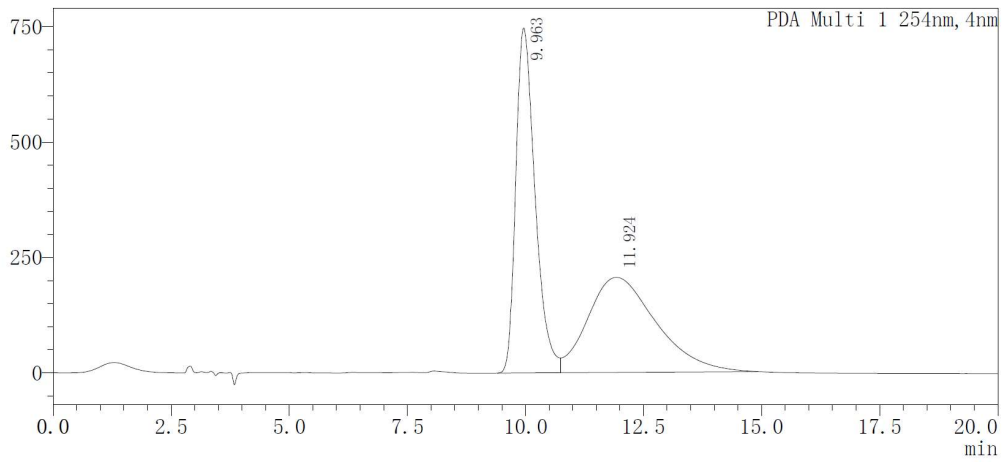

<峰表>

PDA Ch1 254nm

| 峰号 | 保留时间   | 面积       | 高度     | 浓度    | 浓度单位 | 标记  | 化合物名 |
|----|--------|----------|--------|-------|------|-----|------|
| 1  | 9.963  | 21272777 | 747500 | 0.000 |      | M   |      |
| 2  | 11.924 | 20757802 | 206217 | 0.000 |      | V M |      |
| 总计 |        | 42030579 | 953716 |       |      |     |      |

peak number

area

height

retention time

<色谱图> ← HPLC chromatogram

mAU

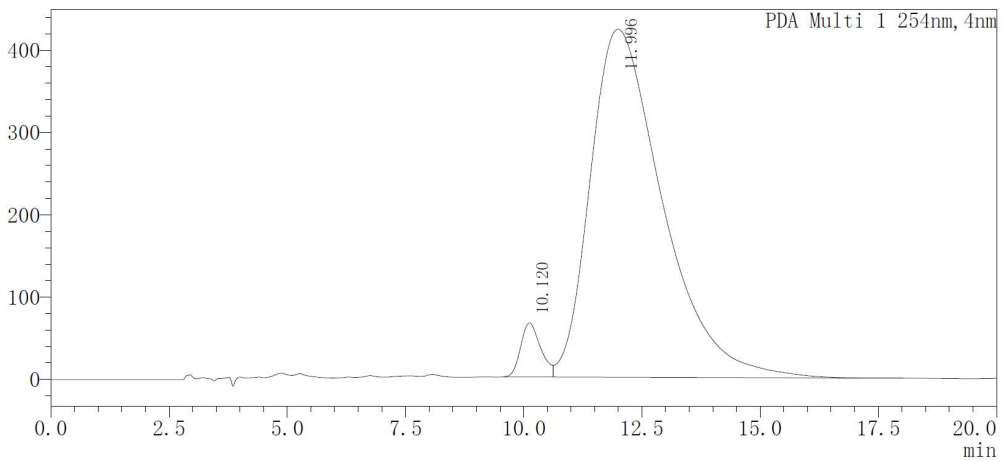

<峰表>

PDA Ch1 254nm

| 峰号 | 保留时间   | 面积       | 高度     | 浓度    | 浓度单位 | 标记  | 化合物名 |
|----|--------|----------|--------|-------|------|-----|------|
| 1  | 10.120 | 1936072  | 65553  | 0.000 |      | M   |      |
| 2  | 11.996 | 44923403 | 422845 | 0.000 |      | V M |      |
| 总计 |        | 46859475 | 488398 |       |      |     |      |

peak number

area

height

retention time

2-((*E*)-3-((3*aS*,6*aS*)-3*a*-Hydroxy-6*a*-methyl-3-(1-methyl-1*H*-indol-5-yl)-6-oxo-1,3*a*,4,5,6,6*a*-hexahydropentalen-2-yl)-3-(1-methyl-1*H*-indol-5-yl)allyl)-2-methylcyclopentane-1,3-dione (**3r**)

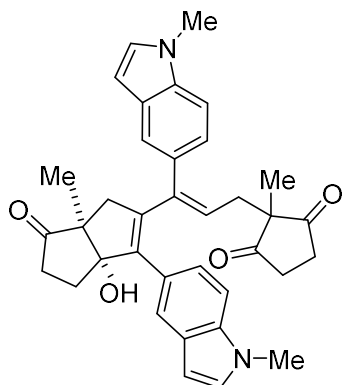

Chemical Formula: C<sub>36</sub>H<sub>36</sub>N<sub>2</sub>O<sub>4</sub>  
Exact Mass: 560.2675

**3r** was prepared according to general procedure 2.1 using **1r** and was purified by silica gel column chromatography (PE/EtOAc = 4/1~2/1) to obtain **3r** as white solid (37% yield). <sup>1</sup>H NMR (400 MHz, CDCl<sub>3</sub>) δ 7.49 (s, 1H), 7.26-7.17 (m, 3H), 7.15-7.08 (m, 1H), 7.03 (d, *J* = 3.0 Hz, 1H), 7.02 (d, *J* = 3.0 Hz, 1H), 6.82-6.80 (m, 1H), 6.44 (d, *J* = 2.9 Hz, 1H), 6.41 (d, *J* = 2.9 Hz, 1H), 5.26 (m, 1H), 3.77 (s, 3H), 3.75 (s, 3H), 2.58 (d, *J* = 17.0 Hz, 1H), 2.42-2.21 (m, 5H), 2.21-2.05 (m, 3H), 1.89-1.62 (m, 4H), 1.06 (s, 3H), 0.73 (s, 3H); <sup>13</sup>C NMR (101 MHz, CDCl<sub>3</sub>) δ 222.0, 216.0, 215.4, 144.6, 141.5, 140.7, 135.8, 135.8, 129.0, 128.9, 128.7, 128.3, 128.1, 126.6, 124.7, 122.9, 122.3, 121.0, 121.0, 109.0, 108.9, 101.1, 101.0, 92.4, 56.4, 56.1, 44.7, 36.8, 34.8, 34.8, 34.4, 32.8, 32.8, 29.3, 18.8, 15.4; HRMS: (ESI) calcd for C<sub>36</sub>H<sub>36</sub>N<sub>2</sub>NaO<sub>4</sub><sup>+</sup>[M+Na]<sup>+</sup> 583.2567; found 583.2589.

The enantiomeric purity was established by HPLC analysis using a chiral column: OD-H column, 30 °C, *n*-Hexane/*i*-Propanol = 80/20 as eluent, 254 nm, 1 mL/min. t<sub>R</sub> = 21 min (minor), 24 min (major).

Optical Rotation: [α]<sub>D</sub><sup>20</sup> -61.0 (c 0.8, *i*PrOH) for 90%ee.

Absolute stereochemistry was determined through analogy with **3a**.

<色谱图> ← HPLC chromatogram

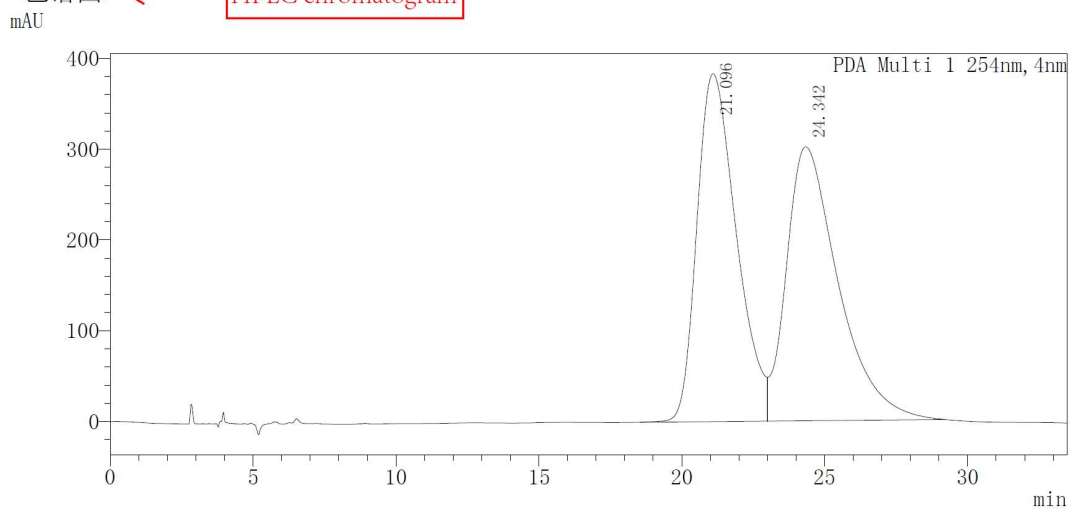

<峰表>

PDA Ch1 254nm

| 峰号 | 保留时间   | 面积       | 高度     | 浓度    | 浓度单位 | 标记  | 化合物名 |
|----|--------|----------|--------|-------|------|-----|------|
| 1  | 21.096 | 36875882 | 383599 | 0.000 |      | M   |      |
| 2  | 24.342 | 38169194 | 302033 | 0.000 |      | V M |      |
| 总计 |        | 75045076 | 685632 |       |      |     |      |

peak number

area

height

retention time

<色谱图> ← HPLC chromatogram

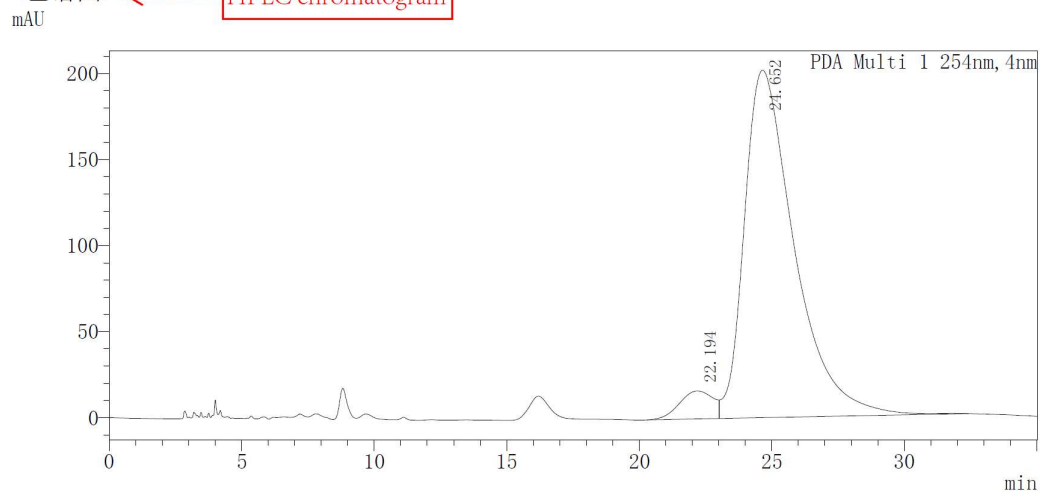

<峰表>

PDA Ch1 254nm

| 峰号 | 保留时间   | 面积       | 高度     | 浓度    | 浓度单位 | 标记  | 化合物名 |
|----|--------|----------|--------|-------|------|-----|------|
| 1  | 22.194 | 1433986  | 16274  | 0.000 |      | M   |      |
| 2  | 24.652 | 26511681 | 201924 | 0.000 |      | V M |      |
| 总计 |        | 27945667 | 218199 |       |      |     |      |

peak number

area

height

retention time



2-((*E*)-3-((3*aS*,6*aS*)-3*a*-Hydroxy-6*a*-methyl-3-((8*R*,9*S*,13*S*,14*S*)-13-methyl-17-oxo-7,8,9,11,12,13,14,15,16,17-decahydro-6*H*-cyclopenta[*a*]phenanthren-2-yl)-6-oxo-1,3*a*,4,5,6,6*a*-hexahydropentalen-2-yl)-3-((8*R*,9*S*,13*S*,14*S*)-13-methyl-17-oxo-7,8,9,11,12,13,14,15,16,17-decahydro-6*H*-cyclopenta[*a*]phenanthren-2-yl)allyl)-2-methylcyclopentane-1,3-dione (**3s**)

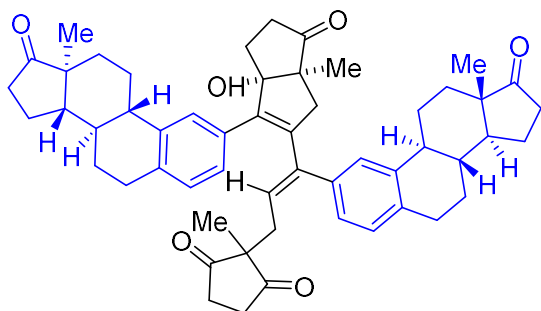

Chemical Formula: C<sub>54</sub>H<sub>62</sub>O<sub>6</sub>  
Exact Mass: 806.4546

**3s** was prepared according to general procedure 2.1 using **1s** and was purified by silica gel column chromatography (PE/EtOAc = 4/1~2/1) to obtain **3s** as white solid (83% yield). <sup>1</sup>H NMR (400 MHz, CDCl<sub>3</sub>) δ 7.14-7.04 (m, 2H), 6.93-6.85 (m, 1H), 6.78 (s, 1H), 6.63 (d, *J* = 8.0 Hz, 1H), 6.51 (s, 1H), 5.27 (t, *J* = 7.1 Hz, 1H), 2.89-2.71 (m, 4H), 2.63 (d, *J* = 16.7 Hz, 1H), 2.54-2.44 (m, 4H), 2.40-2.32 (m, 4H), 2.26-2.19 (m, 5H), 2.16-2.11 (m, 1H), 2.11-1.91 (m, 10H), 1.87-1.79 (m, 1H), 1.65-1.44 (m, 11H), 1.07 (s, 3H), 0.91 (s, 3H), 0.88 (s, 3H), 0.80 (s, 3H); <sup>13</sup>C NMR (101 MHz, CDCl<sub>3</sub>) δ 221.7, 220.9, 220.7, 215.8, 215.3, 144.3, 140.8, 140.6, 138.3, 138.1, 135.9, 135.7, 134.7, 133.0, 129.4, 129.3, 126.1, 126.1, 125.0, 124.8, 124.8, 92.1, 56.2, 56.0, 50.4, 50.4, 47.9, 47.8, 44.4, 44.4, 44.2, 38.1, 37.9, 36.6, 35.7, 35.0, 34.8, 34.7, 31.5, 29.2, 29.2, 29.1, 26.5, 26.4, 25.6, 25.5, 21.5, 18.0, 15.3, 13.8; HRMS: (ESI) calcd for C<sub>54</sub>H<sub>63</sub>O<sub>6</sub><sup>+</sup>[M+H]<sup>+</sup> 807.4619; found 807.4601.

Optical Rotation: [α]<sub>D</sub><sup>20</sup> 65.4 (c 2.3, <sup>i</sup>PrOH)

Absolute stereochemistry was determined through analogy with **3a**.

---

2-Ethyl-2-((*E*)-3-((3*aS*,6*aS*)-6*a*-ethyl-3*a*-hydroxy-6-oxo-3-phenyl-1,3*a*,4,5,6,6*a*-hexahydropentalen-2-yl)-3-phenylallyl)cyclopentane-1,3-dione (**3t**)

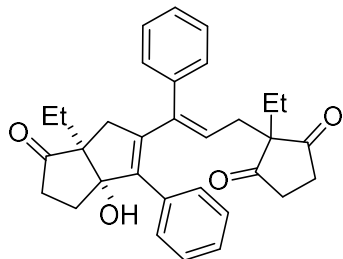

Chemical Formula: C<sub>32</sub>H<sub>34</sub>O<sub>4</sub>  
Exact Mass: 482.2457

**3t** was prepared according to general procedure 2.1 using **1t** and was purified by silica gel column chromatography (PE/EtOAc = 4/1~2/1) to obtain **3t** as white solid (76% yield). <sup>1</sup>H NMR (400 MHz, CDCl<sub>3</sub>) δ 7.24-7.11 (m, 8H), 6.92-6.84 (m, 2H), 5.34 (t, *J* = 7.3 Hz, 1H), 2.65 (d, *J* = 16.9 Hz, 1H), 2.51-2.33 (m, 4H), 2.29-2.18 (m, 4H), 2.06-1.86 (m, 4H), 1.78-1.68 (m, 1H), 1.61-1.52 (m, 1H), 1.33 (q, *J* = 7.4 Hz, 2H), 0.92 (t, *J* = 7.5 Hz, 3H), 0.56 (t, *J* = 7.4 Hz, 3H); <sup>13</sup>C NMR (101 MHz, CDCl<sub>3</sub>) δ 221.0, 216.2, 215.7, 144.6, 141.3, 140.5, 137.4, 135.4, 128.9, 128.8, 128.2, 128.1, 127.2, 127.0, 126.0, 92.6, 61.1, 59.8, 42.7, 36.7, 36.0, 35.8, 33.4, 29.4, 27.2, 23.6, 9.2, 8.9; HRMS: (ESI) calcd for C<sub>32</sub>H<sub>35</sub>O<sub>4</sub><sup>+</sup>[M+H]<sup>+</sup> 505.2349; found 505.2345.

The enantiomeric purity was established by HPLC analysis using a chiral column: AD-H column, 30 °C, *n*-Hexane/*i*-Propanol = 80/20 as eluent, 254 nm, 1 mL/min. t<sub>R</sub> = 6 min (major), 10 min (minor).

Optical Rotation: [α]<sub>D</sub><sup>20</sup> -53.1 (c 1.5, <sup>t</sup>PrOH) for 92%ee.

Absolute stereochemistry was determined through analogy with **3a**.

<色谱图>

HPLC chromatogram

mAU

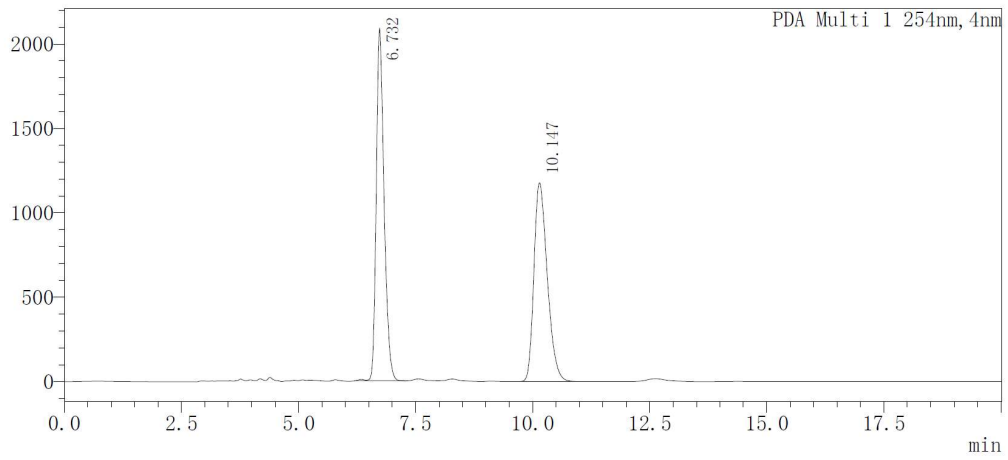

<峰表>

PDA Ch1 254nm

| 峰号 | 保留时间   | 面积       | 高度      | 浓度    | 浓度单位 | 标记 | 化合物名 |
|----|--------|----------|---------|-------|------|----|------|
| 1  | 6.732  | 24127421 | 2089649 | 0.000 |      | M  |      |
| 2  | 10.147 | 23283956 | 1176554 | 0.000 |      | M  |      |
| 总计 |        | 47411377 | 3266203 |       |      |    |      |

peak number

area

height

retention time

<色谱图>

HPLC chromatogram

mAU

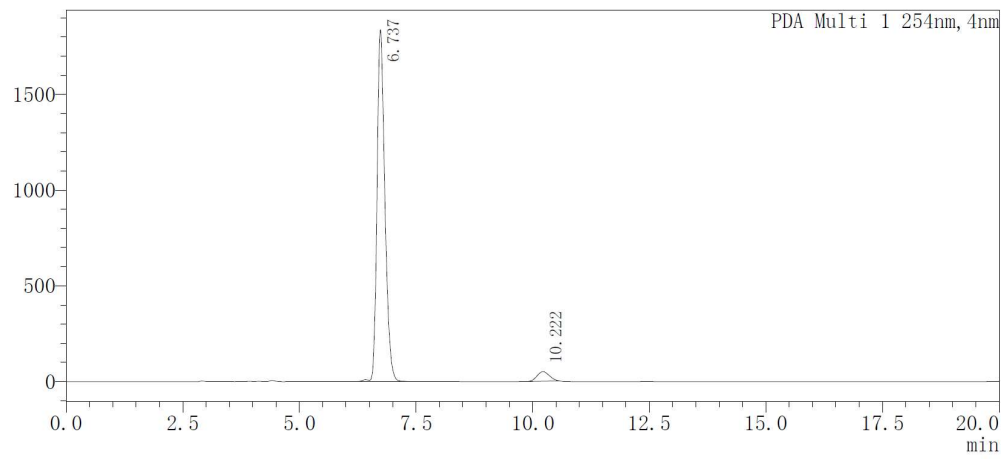

<峰表>

PDA Ch1 254nm

| 峰号 | 保留时间   | 面积       | 高度      | 浓度    | 浓度单位 | 标记 | 化合物名 |
|----|--------|----------|---------|-------|------|----|------|
| 1  | 6.737  | 21457120 | 1837716 | 0.000 |      | M  |      |
| 2  | 10.222 | 917024   | 50027   | 0.000 |      | M  |      |
| 总计 |        | 22374144 | 1887743 |       |      |    |      |

peak number

area

height

retention time

---

2-Benzyl-2-((*E*)-3-((3*aS*,6*aS*)-6a-benzyl-3a-hydroxy-6-oxo-3-phenyl-1,3a,4,5,6,6a-hexahydropentalen-2-yl)-3-phenylallyl)cyclopentane-1,3-dione (**3u**)

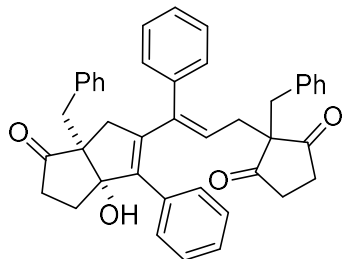

Chemical Formula: C<sub>42</sub>H<sub>38</sub>O<sub>4</sub>  
Exact Mass: 606.2770

**3u** was prepared according to general procedure 2.1 using **1u** and was purified by silica gel column chromatography (PE/EtOAc = 4/1~2/1) to obtain **3u** as white solid (89% yield). <sup>1</sup>H NMR (400 MHz, CDCl<sub>3</sub>) δ 7.23-7.09 (m, 16H), 6.91-6.87 (m, 2H), 6.86-6.82 (m, 2H), 5.35 (t, *J* = 7.3 Hz, 1H), 3.04 (d, *J* = 13.5 Hz, 1H), 2.95 (d, *J* = 13.5 Hz, 1H), 2.71-2.60 (m, 2H), 2.59-2.49 (m, 2H), 2.36 (d, *J* = 7.3 Hz, 2H), 2.10 (s, 1H), 2.02-1.83 (m, 4H), 1.81-1.62 (m, 3H), 1.36-1.14 (m, 1H); <sup>13</sup>C NMR (101 MHz, CDCl<sub>3</sub>) δ 221.6, 217.1, 216.4, 144.0, 141.4, 140.5, 137.2, 137.1, 135.3, 135.2, 130.4, 129.6, 128.9, 128.7, 128.4, 128.2, 128.2, 128.1, 127.3, 127.1, 127.1, 126.6, 125.8, 92.6, 62.2, 61.3, 44.2, 41.7, 37.4, 37.1, 36.5, 36.2, 34.8, 29.3; HRMS: (ESI) calcd for C<sub>42</sub>H<sub>38</sub>NaO<sub>4</sub><sup>+</sup>[M+Na]<sup>+</sup> 629.2662; found 629.2659.

The enantiomeric purity was established by HPLC analysis using a chiral column: OD-H column, 30 °C, *n*-Hexane/*i*-Propanol = 85/15 as eluent, 254 nm, 1 mL/min. t<sub>R</sub> = 8 min (minor), 10 min (major).

Optical Rotation: [α]<sub>D</sub><sup>20</sup> -8.5 (c 2.2, <sup>t</sup>PrOH) for 97%ee.

Absolute stereochemistry was determined through analogy with **3a**.

<色谱图> ← HPLC chromatogram

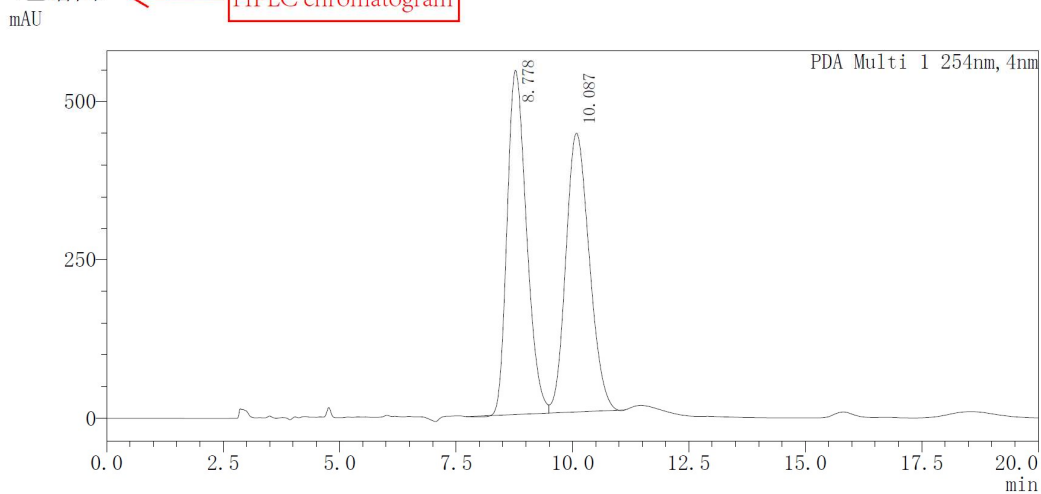

<峰表>

PDA Ch1 254nm

| 峰号 | 保留时间   | 面积       | 高度     | 浓度    | 浓度单位 | 标记  | 化合物名 |
|----|--------|----------|--------|-------|------|-----|------|
| 1  | 8.778  | 15691567 | 543264 | 0.000 |      | M   |      |
| 2  | 10.087 | 15430325 | 440167 | 0.000 |      | V M |      |
| 总计 |        | 31121891 | 983431 |       |      |     |      |

peak number

retention time

area

height

<色谱图> ← HPLC chromatogram

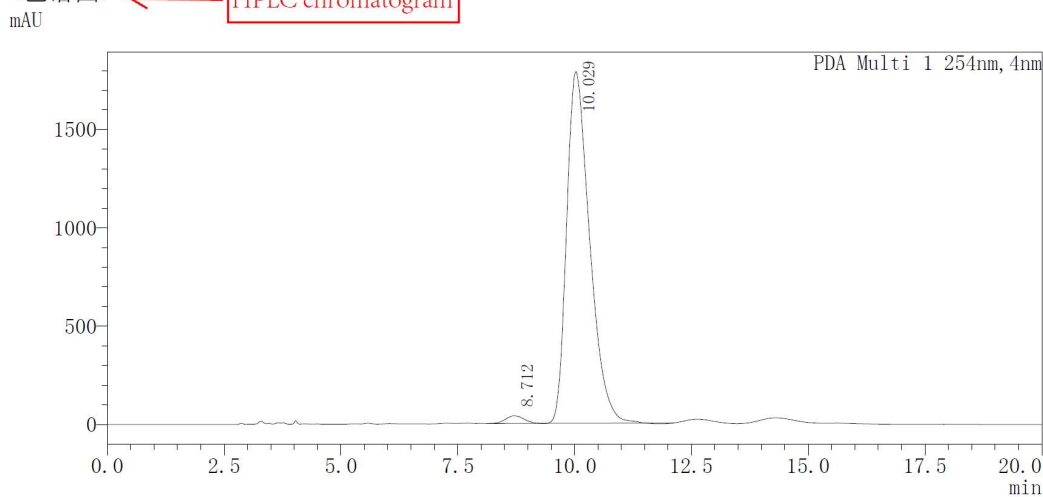

<峰表>

PDA Ch1 254nm

| 峰号 | 保留时间   | 面积       | 高度      | 浓度    | 浓度单位 | 标记 | 化合物名 |
|----|--------|----------|---------|-------|------|----|------|
| 1  | 8.712  | 1054041  | 38827   | 0.000 |      | M  |      |
| 2  | 10.029 | 61280310 | 1789170 | 0.000 |      | M  |      |
| 总计 |        | 62334351 | 1827997 |       |      |    |      |

peak number

retention time

area

height

*Tert*-butyl 3-((3*aS*,6*aS*)-5-((*E*)-3-(1-(3-(*tert*-butoxy)-3-oxopropyl)-2,5-dioxocyclopentyl)-1-phenylprop-1-en-1-yl)-6*a*-hydroxy-3-oxo-6-phenyl-2,3,4,6*a*-tetrahydropentalen-3*a*(1*H*)-yl)propanoate (**3v**)

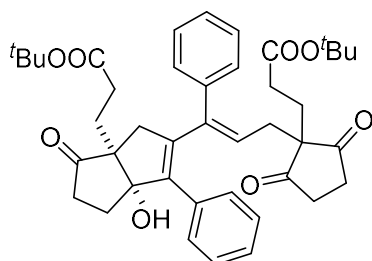

Chemical Formula: C<sub>42</sub>H<sub>50</sub>O<sub>8</sub>  
Exact Mass: 682.3506

**3v** was prepared according to general procedure 2.1 using **1v** and was purified by silica gel column chromatography (PE/EtOAc = 4/1~2/1) to obtain **3v** as white solid (50% yield). <sup>1</sup>H NMR (400 MHz, CDCl<sub>3</sub>) δ 7.24-7.10 (m, 8H), 6.90-6.80 (m, 2H), 5.37 (t, *J* = 7.3 Hz, 1H), 2.63 (d, *J* = 16.7 Hz, 1H), 2.59-2.49 (m, 2H), 2.46-2.37 (m, 3H), 2.28-2.14 (m, 6H), 2.04-1.79 (m, 7H), 1.57-1.52 (m, 2H), 1.41 (s, 9H), 1.35 (s, 9H); <sup>13</sup>C NMR (101 MHz, CDCl<sub>3</sub>) δ 220.4, 214.7, 214.4, 173.0, 172.1, 144.0, 141.4, 140.8, 137.3, 135.3, 129.0, 128.7, 128.2, 128.1, 127.3, 127.0, 125.6, 92.5, 80.8, 80.5, 59.0, 58.5, 42.4, 36.6, 35.2, 35.1, 33.9, 30.4, 29.6, 29.3, 28.0, 27.9, 27.1, 24.9; HRMS: (ESI) calcd for C<sub>42</sub>H<sub>51</sub>O<sub>8</sub><sup>+</sup>[M+H]<sup>+</sup> 683.3578; found 683.3578.

The enantiomeric purity was established by HPLC analysis using a chiral column: AD-H column, 30 °C, *n*-Hexane/*i*-Propanol = 80/20 as eluent, 254 nm, 1 mL/min. tR = 6 min (minor), 8 min (major).

Optical Rotation: [α]<sub>D</sub><sup>24</sup> -56.4 (c 0.7, *t*PrOH) for 96%*ee*.

Absolute stereochemistry was determined through analogy with **3a**.

<色谱图> ← HPLC chromatogram

mAU

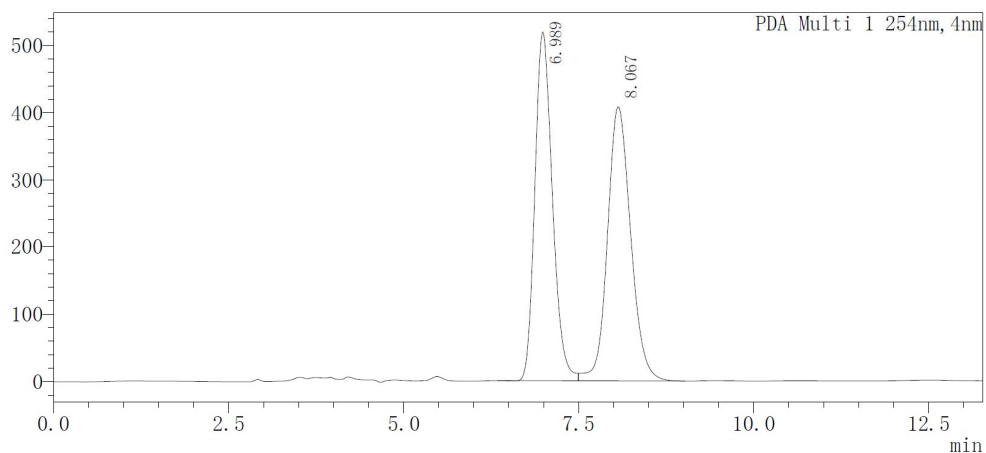

<峰表>

PDA Ch1 254nm

| 峰号 | 保留时间  | 面积       | 高度     | 浓度    | 浓度单位 | 标记  | 化合物名 |
|----|-------|----------|--------|-------|------|-----|------|
| 1  | 6.989 | 9032931  | 518701 | 0.000 |      | M   |      |
| 2  | 8.067 | 9423831  | 407904 | 0.000 |      | V M |      |
| 总计 |       | 18456762 | 926604 |       |      |     |      |

peak number

area

height

retention time

<色谱图> ← HPLC chromatogram

mAU

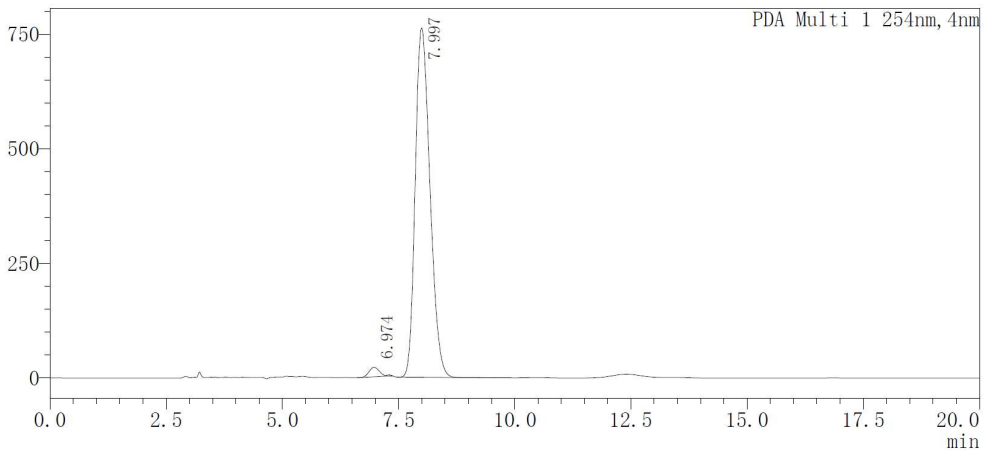

<峰表>

PDA Ch1 254nm

| 峰号 | 保留时间  | 面积       | 高度     | 浓度    | 浓度单位 | 标记 | 化合物名 |
|----|-------|----------|--------|-------|------|----|------|
| 1  | 6.974 | 335722   | 20815  | 0.000 |      | M  |      |
| 2  | 7.997 | 16810693 | 762338 | 0.000 |      | M  |      |
| 总计 |       | 17146416 | 783153 |       |      |    |      |

peak number

area

height

retention time

---

2-((*E*)-3-((3*aS*,6*aS*)-3a-Hydroxy-6a-(2-methylallyl)-6-oxo-3-phenyl-1,3a,4,5,6,6a-hexahydropentalen-2-yl)-3-phenylallyl)-2-(2-methylallyl)cyclopentane-1,3-dione (**3w**)

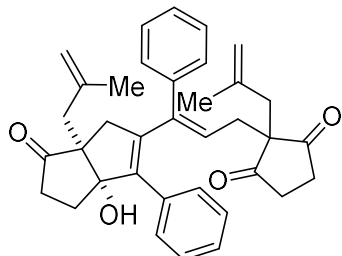

Chemical Formula: C<sub>36</sub>H<sub>38</sub>O<sub>4</sub>  
Exact Mass: 534.2770

**3w** was prepared according to general procedure 2.1 using **1w** and was purified by silica gel column chromatography (PE/EtOAc = 4/1~2/1) to obtain **3w** as white solid (53% yield). <sup>1</sup>H NMR (400 MHz, CDCl<sub>3</sub>) δ 7.22-7.12 (m, 8H), 6.89-6.83 (m, 2H), 5.34 (t, *J* = 7.3 Hz, 1H), 4.85-4.81 (m, 1H), 4.79-4.76 (m, 1H), 4.70-4.64 (m, 1H), 4.41-4.35 (m, 1H), 2.69 (d, *J* = 16.8 Hz, 1H), 2.53-2.35 (m, 6H), 2.27-2.15 (m, 5H), 2.09-1.96 (m, 4H), 1.93-1.85 (m, 1H), 1.71 (s, 3H), 1.46 (dd, *J* = 1.3, 0.8 Hz, 3H); <sup>13</sup>C NMR (101 MHz, CDCl<sub>3</sub>) δ 220.3, 216.3, 215.8, 144.5, 142.7, 141.0, 140.7, 140.3, 137.2, 135.3, 128.9, 128.7, 128.2, 128.1, 127.3, 127.1, 125.5, 115.1, 115.0, 93.0, 60.7, 59.6, 44.0, 42.4, 39.1, 36.8, 36.3, 36.1, 35.3, 29.5, 24.1, 24.0; HRMS: (ESI) calcd for C<sub>36</sub>H<sub>38</sub>NaO<sub>4</sub><sup>+</sup>[M+Na]<sup>+</sup> 557.2662; found 557.2652. The enantiomeric purity was established by HPLC analysis using a chiral column: AD-H column, 30 °C, *n*-Hexane/*i*-Propanol = 80/20 as eluent, 254 nm, 1 mL/min. t<sub>R</sub> = 5 min (major), 9 min (minor).

Optical Rotation: [α]<sub>D</sub><sup>20</sup> -102.0 (c 1.1, *i*-PrOH) for 98%ee.

Absolute stereochemistry was determined through analogy with **3a**.



<色谱图> ← HPLC chromatogram

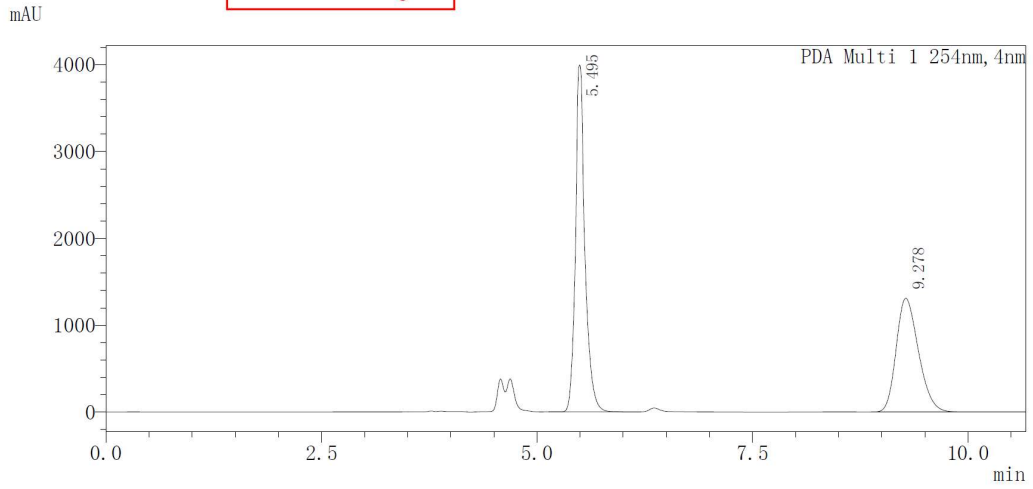

<峰表>

PDA Ch1 254nm

| 峰号 | 保留时间  | 面积       | 高度      | 浓度    | 浓度单位 | 标记 | 化合物名 |
|----|-------|----------|---------|-------|------|----|------|
| 1  | 5.495 | 30470773 | 3994075 | 0.000 |      | M  |      |
| 2  | 9.278 | 23509272 | 1309814 | 0.000 |      | M  |      |
| 总计 |       | 53980045 | 5303889 |       |      |    |      |

peak number

retention time

area

height

<色谱图> ← HPLC chromatogram

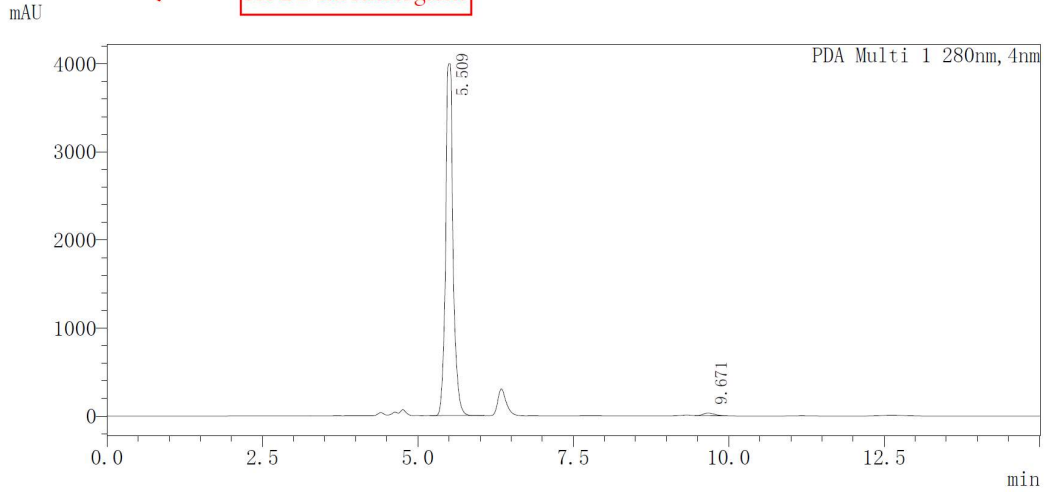

<峰表>

PDA Ch1 280nm

| 峰号 | 保留时间  | 面积       | 高度      | 浓度     | 浓度单位 | 标记 | 化合物名 |
|----|-------|----------|---------|--------|------|----|------|
| 1  | 5.509 | 33381239 | 3994196 | 98.870 |      | M  |      |
| 2  | 9.671 | 381356   | 30112   | 1.130  |      | M  |      |
| 总计 |       | 33762594 | 4024307 |        |      |    |      |

peak number

retention time

area

height

2-Benzyl-2-((*E*)-3-((3*a*S,8*a*S)-8*a*-benzyl-3*a*-hydroxy-8-oxo-3-phenyl-1,3*a*,8,8*a*-tetrahydrocyclopenta[*a*]inden-2-yl)-3-phenylallyl)-1*H*-indene-1,3(2*H*)-dione (**3x**)

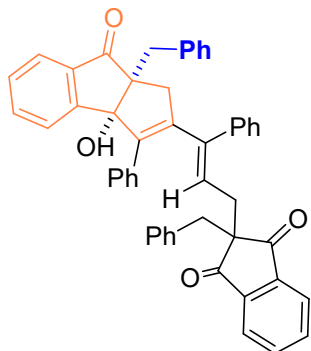

Chemical Formula: C<sub>50</sub>H<sub>38</sub>O<sub>4</sub>  
Exact Mass: 702.2770

**3x** was prepared according to general procedure 2.1 using **1x** and was purified by silica gel column chromatography (PE/EtOAc = 12/1~10/1) to obtain **3x** as white solid (51% yield). <sup>1</sup>H NMR (400 MHz, CDCl<sub>3</sub>) δ 7.74-7.69 (m, 2H), 7.67-7.61 (m, 3H), 7.31-7.27 (m, 2H), 7.15-7.10 (m, 5H), 7.09-7.05 (m, 3H), 7.02-6.98 (m, 3H), 6.95-6.89 (m, 3H), 6.80-6.76 (m, 3H), 6.74-6.69 (m, 4H), 5.50 (t, *J* = 7.3 Hz, 1H), 3.21 (d, *J* = 13.8 Hz, 1H), 3.01 (d, *J* = 13.8 Hz, 1H), 2.73-2.67 (m, 3H), 2.57 (d, *J* = 17.3 Hz, 1H), 2.44-2.38 (m, 3H); <sup>13</sup>C NMR (101 MHz, CDCl<sub>3</sub>) δ 206.6, 202.9, 202.9, 154.3, 142.1, 141.9, 141.9, 141.8, 140.4, 137.4, 137.1, 135.5, 135.4, 135.4, 134.8, 134.2, 130.3, 129.9, 129.8, 128.9, 128.9, 127.8, 127.8, 127.8, 127.3, 126.8, 126.8, 126.4, 126.3, 126.2, 124.5, 123.3, 122.7, 92.5, 63.3, 59.6, 41.4, 39.4, 38.8, 34.5; HRMS: (ESI) calcd for C<sub>50</sub>H<sub>38</sub>NaO<sub>4</sub><sup>+</sup>[M+Na]<sup>+</sup> 725.2662; found 725.2649. The enantiomeric purity was established by HPLC analysis using a chiral column: AD-H column, 30 °C, *n*-Hexane/*i*-Propanol = 70/30 as eluent, 254 nm, 1 mL/min. tR = 7 min (major), 10 min (minor).

Optical Rotation: [α]<sub>D</sub><sup>20</sup> -27.4 (c 1.4, *i*PrOH) for 93%*ee*.

Absolute stereochemistry was determined through analogy with **3a**.

<色谱图> ← HPLC chromatogram

mAU

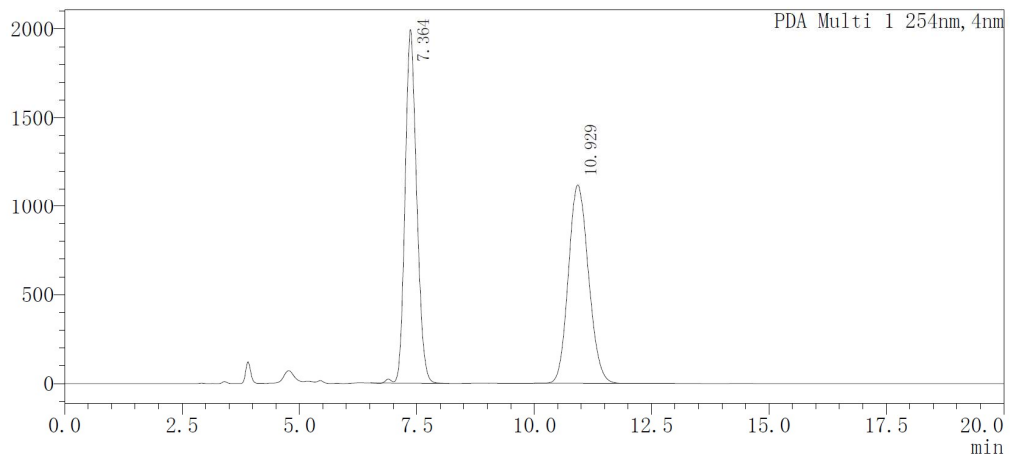

<峰表>

PDA Ch1 254nm

| 峰号 | 保留时间   | 面积       | 高度      | 浓度    | 浓度单位 | 标记 | 化合物名 |
|----|--------|----------|---------|-------|------|----|------|
| 1  | 7.364  | 34263341 | 1994720 | 0.000 |      | M  |      |
| 2  | 10.929 | 33332914 | 1120417 | 0.000 |      | M  |      |
| 总计 |        | 67596255 | 3115137 |       |      |    |      |

peak number

retention time

area

height

<色谱图> ← HPLC chromatogram

mAU

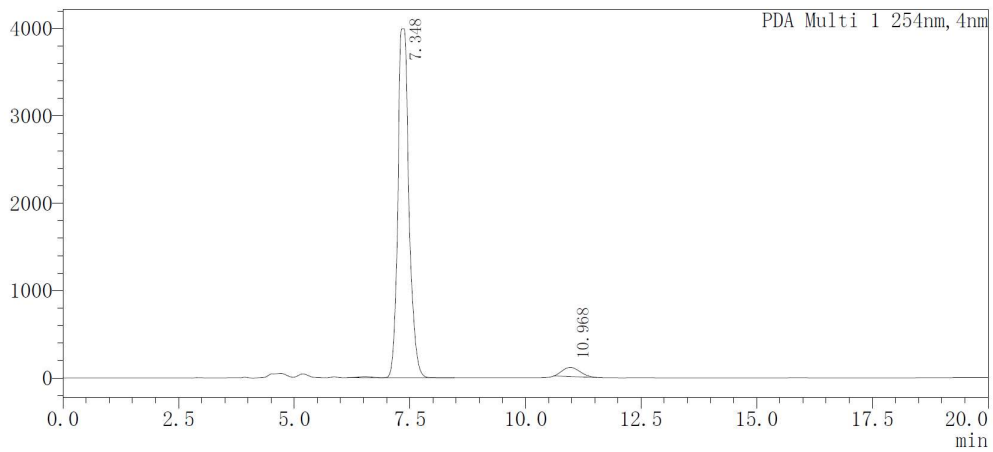

<峰表>

PDA Ch1 254nm

| 峰号 | 保留时间   | 面积       | 高度      | 浓度    | 浓度单位 | 标记 | 化合物名 |
|----|--------|----------|---------|-------|------|----|------|
| 1  | 7.348  | 67078972 | 3996794 | 0.000 |      | M  |      |
| 2  | 10.968 | 2780663  | 104519  | 0.000 |      | M  |      |
| 总计 |        | 69859635 | 4101313 |       |      |    |      |

peak number

retention time

area

height

2-(Benzo[*b*]thiophen-2-ylmethyl)-2-((*E*)-3-((3*a*S,8*a*R)-8a-(benzo[*b*]thiophen-2-ylmethyl)-3*a*-hydroxy-8-oxo-3-phenyl-1,3*a*,8,8*a*-tetrahydrocyclopenta[*a*]inden-2-yl)-3-phenylallyl)-1*H*-indene-1,3(2*H*)-dione (**3y**)

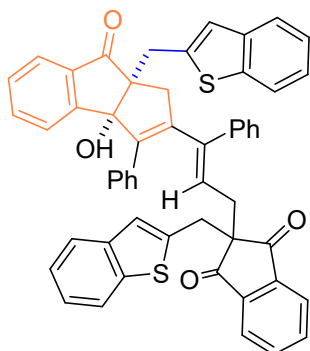

Chemical Formula: C<sub>54</sub>H<sub>38</sub>O<sub>4</sub>S<sub>2</sub>

Exact Mass: 814.2212

**3y** was prepared according to general procedure 2.1 using **1y** and was purified by silica gel column chromatography (Toluene/EtOAc = 30/1~20/1) to obtain **3y** as white solid (57% yield). <sup>1</sup>H NMR (400 MHz, CDCl<sub>3</sub>) δ 7.79-7.75 (m, 2H), 7.73-7.69 (m, 2H), 7.65-7.58 (m, 3H), 7.54-7.48 (m, 2H), 7.37-7.32 (m, 2H), 7.30-7.26 (m, 1H), 7.25-7.21 (m, 1H), 7.19-7.15 (m, 1H), 7.14-7.07 (m, 5H), 7.02-6.94 (m, 3H), 6.89-6.85 (m, 2H), 6.82-6.78 (m, 1H), 6.73 (s, 1H), 6.63-6.58 (m, 2H), 5.56 (t, *J* = 7.3 Hz, 1H), 3.53 (d, *J* = 14.7 Hz, 1H), 3.41 (d, *J* = 14.9 Hz, 1H), 2.90 (s, 2H), 2.76 (d, *J* = 17.4 Hz, 1H), 2.68-2.61 (m, 2H), 2.36 (dd, *J* = 7.4, 1.9 Hz, 2H); <sup>13</sup>C NMR (101 MHz, CDCl<sub>3</sub>) δ 206.6, 202.3, 202.1, 154.6, 141.70, 141.68, 141.53, 141.48, 140.8, 140.4, 139.9, 139.60, 139.58, 139.3, 138.5, 137.1, 135.68, 135.65, 134.9, 134.71, 134.67, 130.2, 129.2, 128.8, 127.8, 127.5, 127.1, 126.9, 125.6, 124.71, 124.65, 124.2, 124.0, 123.9, 123.7, 123.6, 123.1, 122.9, 121.84, 121.79, 92.3, 62.3, 59.1, 42.0, 34.8, 33.8, 32.9; HRMS: (ESI) calcd for C<sub>54</sub>H<sub>38</sub>NaO<sub>4</sub>S<sub>2</sub><sup>+</sup> [M+Na]<sup>+</sup> 837.2104; found 837.2079.

The enantiomeric purity was established by HPLC analysis using a chiral column: AD-H column, 30 °C, *n*-Hexane/*i*-Propanol = 70/30 as eluent, 254 nm, 1 mL/min. tR = 13 min (minor), 17 min (major).

Optical Rotation: [α]<sub>D</sub><sup>20</sup> 13.7 (c 1.0, *i*PrOH) for 90%ee.

Absolute stereochemistry was determined through analogy with **3a**.

<色谱图>

mAU

HPLC chromatogram

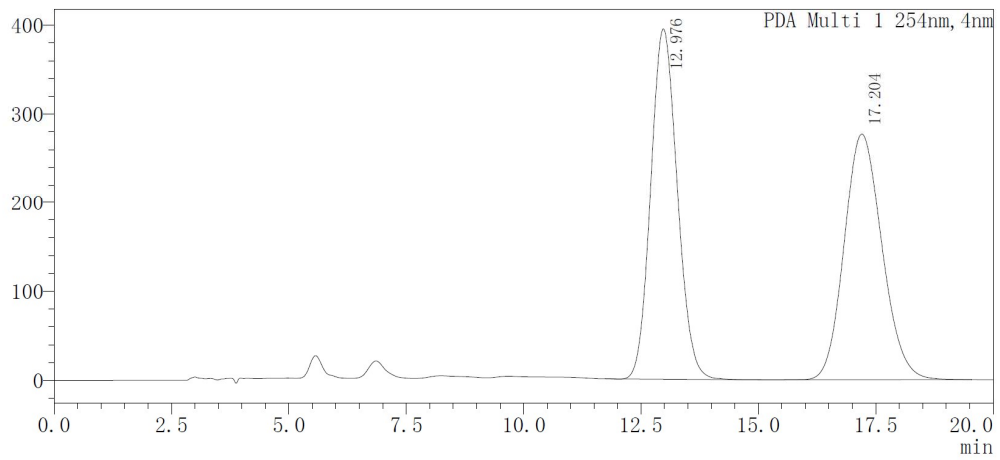

<峰表>

PDA Ch1 254nm

| 峰号 | 保留时间   | 面积       | 高度     | 浓度    | 浓度单位 | 标记 | 化合物名 |
|----|--------|----------|--------|-------|------|----|------|
| 1  | 12.976 | 15509019 | 394588 | 0.000 |      | M  |      |
| 2  | 17.204 | 15490950 | 276827 | 0.000 |      | M  |      |
| 总计 |        | 30999970 | 671415 |       |      |    |      |

peak number

area

height

retention time

<色谱图>

mAU

HPLC chromatogram

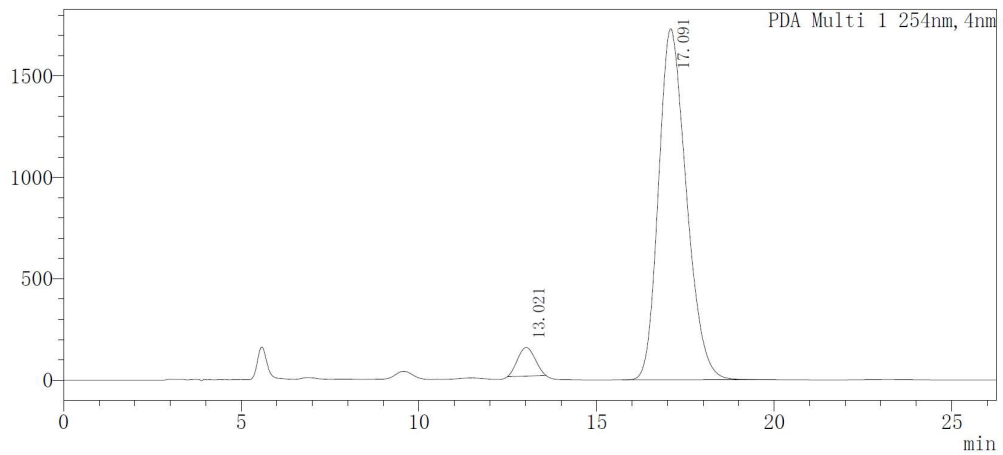

<峰表>

PDA Ch1 254nm

| 峰号 | 保留时间   | 面积       | 高度      | 浓度    | 浓度单位 | 标记 | 化合物名 |
|----|--------|----------|---------|-------|------|----|------|
| 1  | 13.021 | 4811156  | 141112  | 0.000 |      | M  |      |
| 2  | 17.091 | 94424825 | 1731895 | 0.000 |      | M  |      |
| 总计 |        | 99235981 | 1873007 |       |      |    |      |

peak number

area

height

retention time

*N*-((*E*)-3-(4-cyanophenyl)-3-((3*aR*,6*aR*)-3*a*-hydroxy-3-(4-methoxyphenyl)-6*a*-methyl-6-oxo-1,3*a*,4,5,6,6*a*-hexahydropentalen-2-yl)allyl)-*N*-methylacetamide  
(**5ba**)

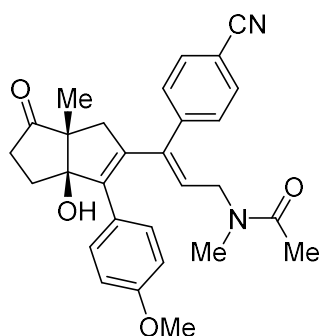

Chemical Formula: C<sub>29</sub>H<sub>30</sub>N<sub>2</sub>O<sub>4</sub>  
Exact Mass: 470.2206

**5ba** was prepared according to general procedure 2.2 using **1b** and **4a** and was purified by silica gel column chromatography (PE/EtOAc = 1/1~1/2.5) to obtain **5ba** as yellow oil (64% yield). <sup>1</sup>H NMR (400 MHz, CDCl<sub>3</sub>, 50 °C) δ 7.43-7.35 (m, 2H), 6.99-6.92 (m, 2H), 6.91-6.85 (m, 2H), 6.68-6.62 (m, 2H), 5.70-5.63 (m, 1H), 4.01-3.88 (m, 1H), 3.75 (s, 3H), 3.68 (dd, *J* = 15.0, 6.5 Hz, 1H), 2.88-2.79 (m, 1H), 2.62 (d, *J* = 11.2 Hz, 3H), 2.52 (d, *J* = 16.7 Hz, 1H), 2.48-2.38 (m, 1H), 2.11-2.02 (m, 2H), 1.96 (s, 3H), 1.88-1.82 (m, 1H), 1.78 (s, 1H), 1.15 (d, *J* = 4.5 Hz, 3H); <sup>13</sup>C NMR (151 MHz, CDCl<sub>3</sub>, 25 °C) δ 221.2, 221.1, 170.4, 170.0, 159.0, 158.8, 143.6, 142.8, 142.5, 142.2, 142.1, 141.5, 139.2, 138.7, 131.8, 131.6, 130.7, 130.1, 129.9, 129.8, 129.6, 127.2, 126.8, 118.6, 118.3, 113.6, 113.4, 111.2, 110.8, 92.2, 92.2, 56.0, 55.3, 49.0, 45.6, 44.2, 44.1, 36.5, 36.5, 35.6, 33.1, 29.5, 29.4, 21.6, 21.2, 15.3, 15.2; HRMS: (ESI) calcd for C<sub>29</sub>H<sub>31</sub>N<sub>2</sub>O<sub>4</sub><sup>+</sup> [M+H]<sup>+</sup> 471.2278; found 471.2270.

The enantiomeric purity was established by HPLC analysis using a chiral column: AD-H column, 30 °C, *n*-Hexane/*i*-Propanol = 70/30 as eluent, 254 nm, 1 mL/min. t<sub>R</sub> = 6.8 min (major), 7.7 min (minor).

Optical Rotation: [α]<sub>D</sub><sup>30</sup> -41.0 (c 1.2, *i*-PrOH) for 92%ee.

Absolute stereochemistry was determined through analogy with X-ray crystal diffraction study of compound **9**.

<色谱图>  
mAU

HPLC chromatogram

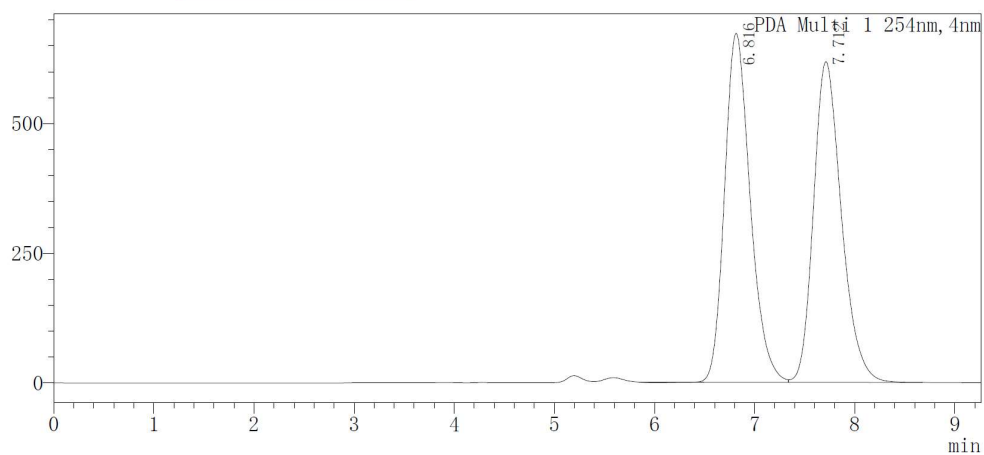

<峰表>

PDA Ch1 254nm

| 峰号 | 保留时间  | 面积       | 高度      | 浓度    | 浓度单位 | 标记  | 化合物名 |
|----|-------|----------|---------|-------|------|-----|------|
| 1  | 6.816 | 11980301 | 673077  | 0.000 |      | M   |      |
| 2  | 7.712 | 11998151 | 618544  | 0.000 |      | V M |      |
| 总计 |       | 23978452 | 1291621 |       |      |     |      |

peak number

retention time

area

height

<色谱图>  
mAU

HPLC chromatogram

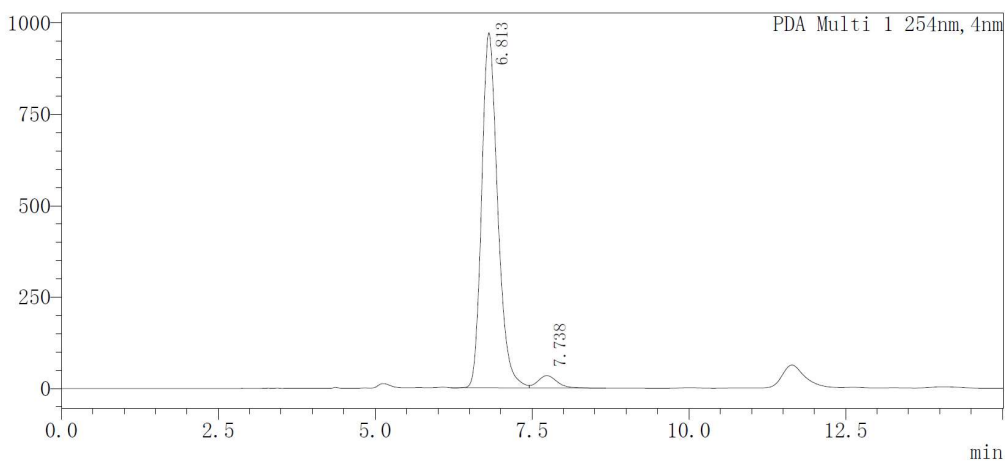

<峰表>

PDA Ch1 254nm

| 峰号 | 保留时间  | 面积       | 高度      | 浓度    | 浓度单位 | 标记  | 化合物名 |
|----|-------|----------|---------|-------|------|-----|------|
| 1  | 6.813 | 17287186 | 971897  | 0.000 |      | M   |      |
| 2  | 7.738 | 715640   | 33847   | 0.000 |      | V M |      |
| 总计 |       | 18002827 | 1005744 |       |      |     |      |

peak number

retention time

area

height

4-((*E*)-3-(2,5-dioxopyrrolidin-1-yl)-1-((3*aR*,6*aR*)-3a-hydroxy-3-(4-methoxyphenyl)-6a-methyl-6-oxo-1,3a,4,5,6,6a-hexahydropentalen-2-yl)prop-1-en-1-yl)benzonitrile (**5bd**)

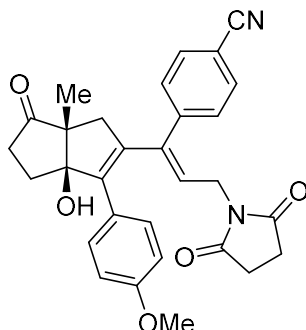

Chemical Formula: C<sub>30</sub>H<sub>28</sub>N<sub>2</sub>O<sub>5</sub>  
Exact Mass: 496.1998

**5bd** was prepared according to general procedure 2.2 using **1b** and **4d** and was purified by silica gel column chromatography (PE/EtOAc = 8/1~1/1) to obtain **5bd** as yellow oil (55% yield). <sup>1</sup>H NMR (400 MHz, CDCl<sub>3</sub>) δ 7.41 (d, *J* = 8.1 Hz, 2H), 7.06 (d, *J* = 8.4 Hz, 2H), 6.85 (d, *J* = 8.7 Hz, 2H), 6.62 (d, *J* = 8.6 Hz, 2H), 5.54 (t, *J* = 6.8 Hz, 1H), 4.00-3.84 (m, 2H), 3.76 (s, 3H), 2.82 (d, *J* = 16.8 Hz, 1H), 2.60 (s, 4H), 2.52 (d, *J* = 16.8 Hz, 1H), 2.47-2.36 (m, 1H), 2.08-1.95 (m, 2H), 1.93-1.78 (m, 2H), 1.13 (s, 3H); <sup>13</sup>C NMR (151 MHz, CDCl<sub>3</sub>) δ 221.2, 176.4, 158.8, 143.4, 142.2, 141.6, 139.3, 131.6, 130.1, 129.9, 127.4, 127.0, 118.6, 113.4, 110.9, 92.2, 55.9, 55.3, 44.0, 37.2, 36.5, 29.4, 28.1, 15.2; HRMS: (ESI) calcd for C<sub>30</sub>H<sub>28</sub>N<sub>2</sub>NaO<sub>5</sub><sup>+</sup> [M+Na]<sup>+</sup> 519.1882; found 519.1890.

The enantiomeric purity was established by HPLC analysis using a chiral column: OD-H column, 30 °C, *n*-Hexane/*i*-Propanol = 70/30 as eluent, 254 nm, 1 mL/min. t<sub>R</sub> = 12 min (major), 15 min (minor).

Optical Rotation: [α]<sub>D</sub><sup>27</sup> -63.0 (c 1.1, *i*PrOH) for 97%ee.

Absolute stereochemistry was determined through analogy with X-ray crystal diffraction study of compound **9**.



<色谱图>

HPLC chromatogram

mAU

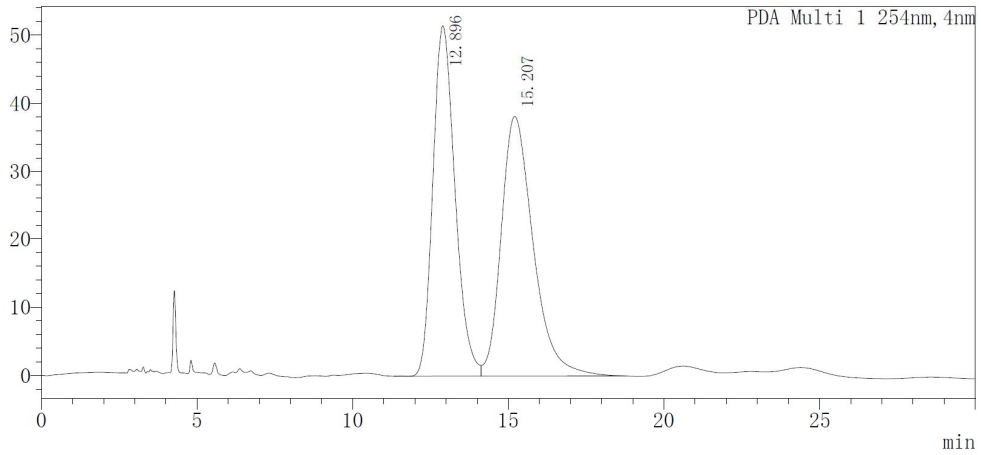

<峰表>

PDA Ch1 254nm

| 峰号 | 保留时间   | 面积      | 高度    | 浓度    | 浓度单位 | 标记  | 化合物名 |
|----|--------|---------|-------|-------|------|-----|------|
| 1  | 12.896 | 2547295 | 51463 | 0.000 |      | M   |      |
| 2  | 15.207 | 2727490 | 38198 | 0.000 |      | V M |      |
| 总计 |        | 5274785 | 89661 |       |      |     |      |

peak number

area

height

retention time

<色谱图>

HPLC chromatogram

mAU

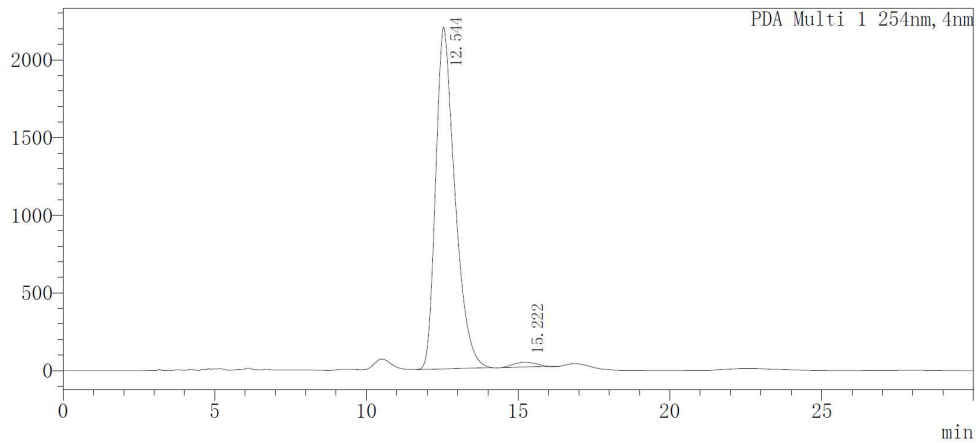

<峰表>

PDA Ch1 254nm

| 峰号 | 保留时间   | 面积       | 高度      | 浓度    | 浓度单位 | 标记 | 化合物名 |
|----|--------|----------|---------|-------|------|----|------|
| 1  | 12.544 | 97012986 | 2199122 | 0.000 |      | M  |      |
| 2  | 15.222 | 1588437  | 29823   | 0.000 |      | M  |      |
| 总计 |        | 98601423 | 2228945 |       |      |    |      |

peak number

area

height

retention time

4-((*E*)-3-(1,3-dioxisoindolin-2-yl)-1-((3*R*,6*R*)-3a-hydroxy-3-(4-methoxyphenyl)-6a-methyl-6-oxo-1,3a,4,5,6,6a-hexahydropentalen-2-yl)prop-1-en-1-yl)benzonitrile (**5be**)

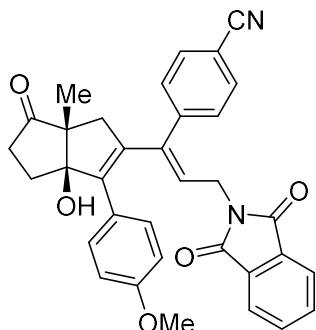

Chemical Formula: C<sub>34</sub>H<sub>28</sub>N<sub>2</sub>O<sub>5</sub>  
Exact Mass: 544.1998

**5be** was prepared according to general procedure 2.2 using **1b** and **4e** and was purified by silica gel column chromatography (PE/EtOAc = 8/1~1/1) to obtain **5be** as yellow oil (65% yield). <sup>1</sup>H NMR (400 MHz, CDCl<sub>3</sub>) δ 7.83-7.77 (m, 2H), 7.75-7.67 (m, 2H), 7.46-7.38 (m, 2H), 7.12-7.07 (m, 2H), 6.88-6.78 (m, 2H), 6.57-6.46 (m, 2H), 5.70 (t, *J* = 6.8 Hz, 1H), 4.19-4.02 (m, 2H), 3.63 (s, 3H), 2.83 (d, *J* = 16.8 Hz, 1H), 2.53 (d, *J* = 16.7 Hz, 1H), 2.44-2.34 (m, 1H), 2.07-1.94 (m, 2H), 1.90-1.78 (m, 2H), 1.13 (s, 3H); <sup>13</sup>C NMR (151 MHz, CDCl<sub>3</sub>) δ 221.1, 167.6, 158.7, 143.3, 142.3, 141.5, 139.1, 134.1, 131.9, 131.6, 123.0, 129.9, 128.0, 126.8, 123.2, 118.6, 113.3, 110.9, 92.2, 55.9, 55.1, 44.0, 36.5, 36.4, 29.4, 15.3; HRMS: (ESI) calcd for C<sub>34</sub>H<sub>28</sub>N<sub>2</sub>NaO<sub>5</sub><sup>+</sup> [M+Na]<sup>+</sup> 567.1882; found 567.1890.

The enantiomeric purity was established by HPLC analysis using a chiral column: AD-H column, 30 °C, *n*-Hexane/*i*-Propanol = 70/30 as eluent, 254 nm, 1 mL/min. tR = 14 min (minor), 16 min (major).

Optical Rotation: [α]<sub>D</sub><sup>30</sup> -98.4 (c 1.4, *i*PrOH) for 95%ee.

Absolute stereochemistry was determined through analogy with X-ray crystal diffraction study of **9**.

<色谱图>

mAU

HPLC chromatogram

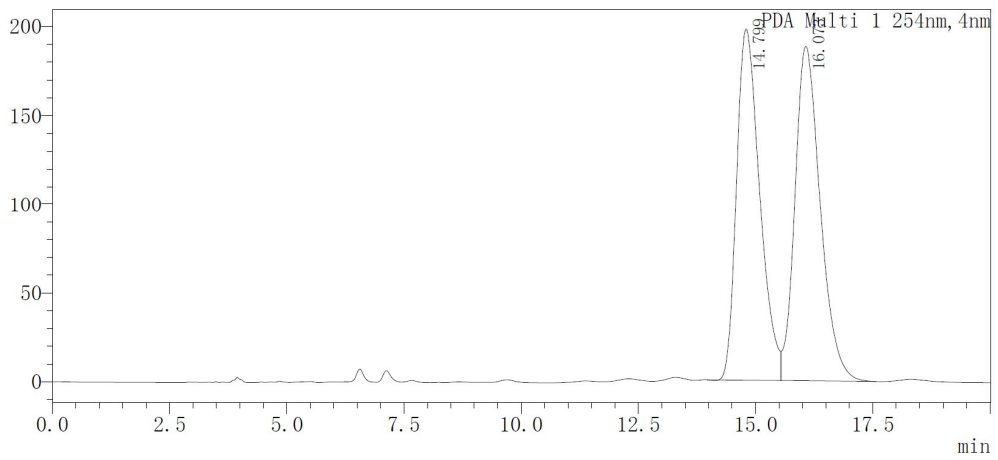

<峰表>

PDA Ch1 254nm

| 峰号 | 保留时间   | 面积       | 高度     | 浓度    | 浓度单位 | 标记  | 化合物名 |
|----|--------|----------|--------|-------|------|-----|------|
| 1  | 14.799 | 6810548  | 197687 | 0.000 |      | M   |      |
| 2  | 16.073 | 7103191  | 188381 | 0.000 |      | V M |      |
| 总计 |        | 13913739 | 386068 |       |      |     |      |

peak number

area

height

retention time

<色谱图>

mAU

HPLC chromatogram

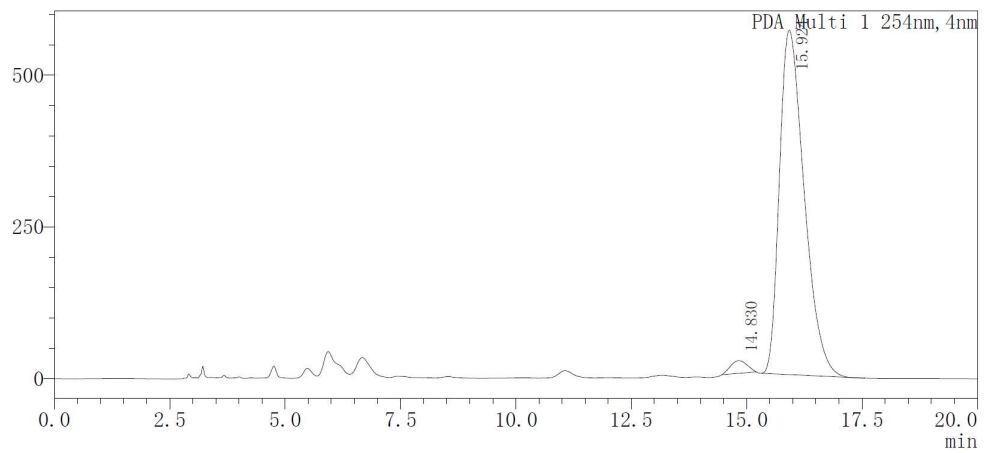

<峰表>

PDA Ch1 254nm

| 峰号 | 保留时间   | 面积       | 高度     | 浓度    | 浓度单位 | 标记 | 化合物名 |
|----|--------|----------|--------|-------|------|----|------|
| 1  | 14.830 | 525104   | 20849  | 0.000 |      | M  |      |
| 2  | 15.924 | 21158863 | 567356 | 0.000 |      | M  |      |
| 总计 |        | 21683967 | 588205 |       |      |    |      |

peak number

area

height

retention time

propyl ((*E*)-3-(4-cyanophenyl)-3-((3*aR*,6*aR*)-3*a*-hydroxy-3-(4-methoxyphenyl)-6*a*-methyl-6-oxo-1,3*a*,4,5,6,6*a*-hexahydropentalen-2-yl)allyl)(methyl)carbamate (**5bf**)

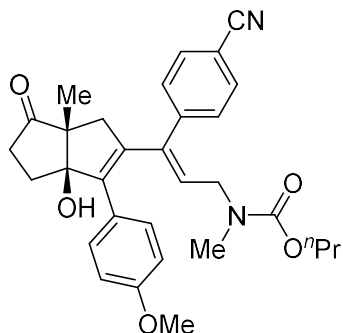

Chemical Formula: C<sub>31</sub>H<sub>34</sub>N<sub>2</sub>O<sub>5</sub>

Exact Mass: 514.2468

**5bf** was prepared according to general procedure 2.2 using **1b** and **4f** and was purified by silica gel column chromatography (PE/EtOAc = 8/1~1/1) to obtain **5bf** as yellow oil (53% yield). <sup>1</sup>H NMR (400 MHz, CDCl<sub>3</sub>) δ 7.40-7.35 (m, 2H), 6.98-6.92 (m, 2H), 6.89-6.85 (m, 2H), 6.65-6.60 (m, 2H), 5.73 (t, *J* = 6.7 Hz, 1H), 3.96 (s, 2H), 3.89-3.78 (m, 1H), 3.75 (s, 3H), 3.60 (dd, *J* = 16.0, 7.2 Hz, 1H), 2.87 (d, *J* = 16.7 Hz, 1H), 2.59-2.53 (m, 4H), 2.50-2.41 (m, 1H), 2.10-1.67 (m, 6H), 1.15 (s, 3H), 0.94-0.85 (m, 3H); <sup>13</sup>C NMR (151 MHz, CDCl<sub>3</sub>) δ 221.3, 158.8, 142.6, 142.0, 138.5, 131.5, 131.1, 130.7, 130.0, 129.9, 129.7, 127.1, 118.6, 113.4, 110.7, 92.2, 67.1, 55.9, 55.2, 47.1, 44.2, 36.5, 29.7, 29.4, 22.3, 15.3, 10.4; HRMS: (ESI) calcd for C<sub>31</sub>H<sub>35</sub>N<sub>2</sub>O<sub>5</sub><sup>+</sup> [M+H]<sup>+</sup> 515.2540; found 515.2530.

The enantiomeric purity was established by HPLC analysis using a chiral column: AD-H column, 30 °C, *n*-Hexane/*i*-Propanol = 70/30 as eluent, 254 nm, 1 mL/min. tR = 5.6 min (minor), 6.6 min (major).

Optical Rotation: [α]<sub>D</sub><sup>27</sup> -79.7 (c 0.6, *i*PrOH) for 94%ee.

Absolute stereochemistry was determined through analogy with X-ray crystal diffraction study of **9**.

<色谱图>

mAU

HPLC chromatogram

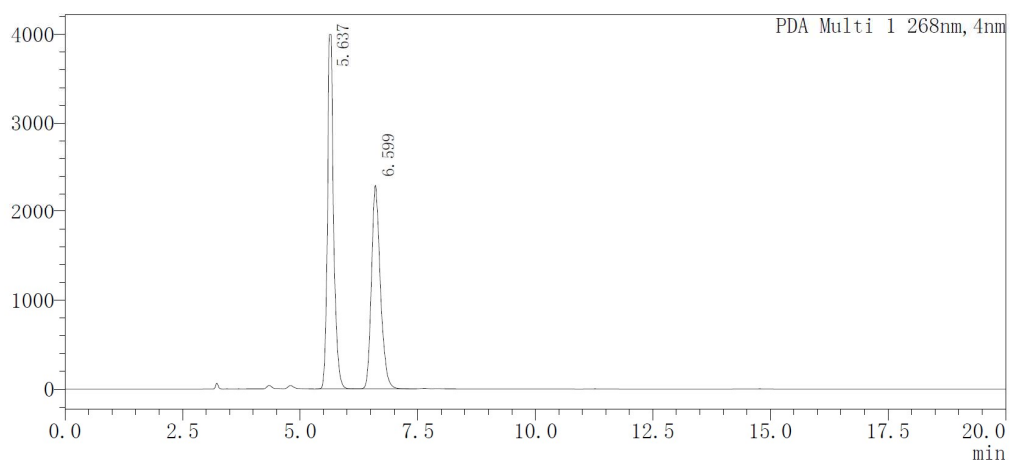

<峰表>

PDA Ch1 268nm

| 峰号 | 保留时间  | 面积       | 高度      | 浓度    | 浓度单位 | 标记 | 化合物名 |
|----|-------|----------|---------|-------|------|----|------|
| 1  | 5.637 | 36359915 | 3995294 | 0.000 |      | M  |      |
| 2  | 6.599 | 30100481 | 2295507 | 0.000 |      | M  |      |
| 总计 |       | 66460396 | 6290801 |       |      |    |      |

peak number

retention time

area

height

<色谱图>

mAU

HPLC chromatogram

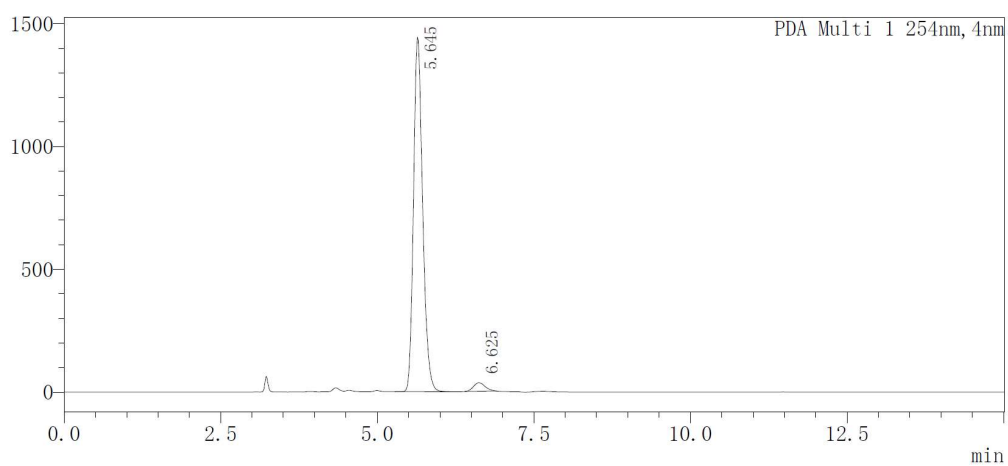

<峰表>

PDA Ch1 254nm

| 峰号 | 保留时间  | 面积       | 高度      | 浓度    | 浓度单位 | 标记 | 化合物名 |
|----|-------|----------|---------|-------|------|----|------|
| 1  | 5.645 | 14680673 | 1444069 | 0.000 |      | M  |      |
| 2  | 6.625 | 449936   | 34735   | 0.000 |      | M  |      |
| 总计 |       | 15130610 | 1478804 |       |      |    |      |

peak number

retention time

area

height

tert-butyl ((*E*)-3-(4-cyanophenyl)-3-((3*aR*,6*aR*)-3*a*-hydroxy-3-(4-methoxyphenyl)-6*a*-methyl-6-oxo-1,3*a*,4,5,6,6*a*-hexahydropentalen-2-yl)allyl)carbamate (**5bg**)

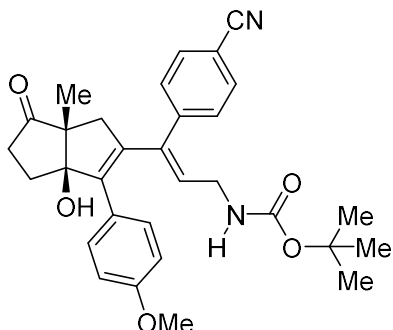

Chemical Formula: C<sub>31</sub>H<sub>34</sub>N<sub>2</sub>O<sub>5</sub>

Exact Mass: 514.2468

**5bg** was prepared according to general procedure 2.2 using **1b** and **4g** and was purified by silica gel column chromatography (PE/EtOAc = 8/1~2/1) to obtain **5bg** as blown oil (46% yield). <sup>1</sup>H NMR (600 MHz, CDCl<sub>3</sub>) δ 7.36-7.32 (m, 2H), 6.94-6.90 (m, 2H), 6.87-6.82 (m, 2H), 6.63-6.58 (m, 2H), 5.76 (t, *J* = 6.8 Hz, 1H), 4.38 (s, 1H), 3.74 (s, 3H), 3.67-3.59 (m, 1H), 3.53-3.46 (m, 1H), 2.89 (d, *J* = 16.7 Hz, 1H), 2.58 (d, *J* = 16.7 Hz, 1H), 2.46-2.39 (m, 1H), 2.07-1.98 (m, 2H), 1.94 (s, 1H), 1.88-1.81 (m, 1H), 1.40 (s, 9H), 1.16 (s, 3H); <sup>13</sup>C NMR (151 MHz, CDCl<sub>3</sub>) δ 221.3, 158.8, 155.5, 142.8, 142.6, 141.8, 137.9, 131.8, 131.5, 130.0, 129.7, 127.0, 118.6, 113.4, 110.6, 92.3, 79.7, 55.9, 55.2, 44.2, 39.1, 36.5, 29.4, 28.3, 15.3; HRMS: (ESI) calcd for C<sub>31</sub>H<sub>35</sub>N<sub>2</sub>O<sub>5</sub><sup>+</sup>[M+H]<sup>+</sup> 515.2540; found 515.2556.

The enantiomeric purity was established by HPLC analysis using a chiral column: OD-H column, 30 °C, *n*-Hexane/*i*-Propanol = 80/20 as eluent, 254 nm, 1 mL/min. t<sub>R</sub> = 6.6 min (major), 7.6 min (minor).

Optical Rotation: [α]<sub>D</sub><sup>29</sup> -57.1 (c 0.9, *i*-PrOH) for 94%ee.

Absolute stereochemistry was determined through analogy with X-ray crystal diffraction study of **9**.

<色谱图>

mAU

HPLC chromatogram

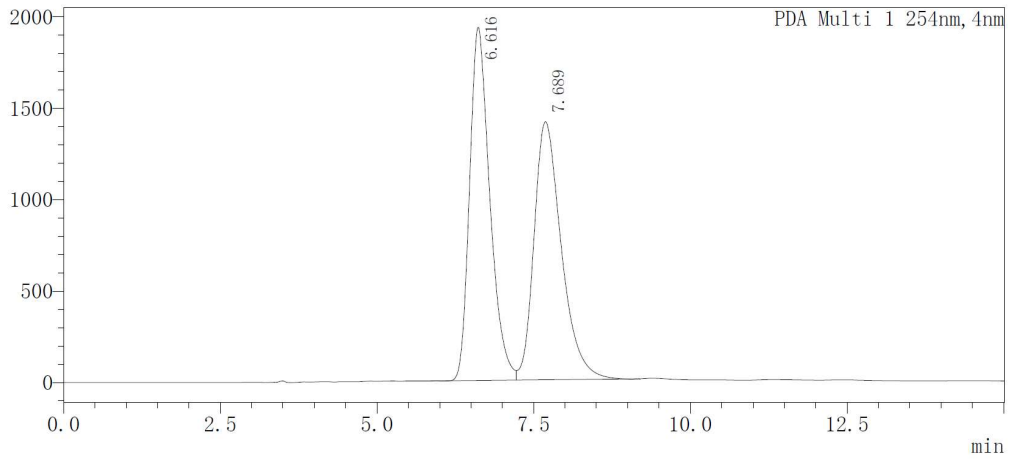

<峰表>

PDA Ch1 254nm

| 峰号 | 保留时间  | 面积       | 高度      | 浓度    | 浓度单位 | 标记  | 化合物名 |
|----|-------|----------|---------|-------|------|-----|------|
| 1  | 6.616 | 43433171 | 1932063 | 0.000 |      | M   |      |
| 2  | 7.689 | 42788689 | 1411683 | 0.000 |      | V M |      |
| 总计 |       | 86221860 | 3343747 |       |      |     |      |

peak number

area

height

retention time

<色谱图>

mAU

HPLC chromatogram

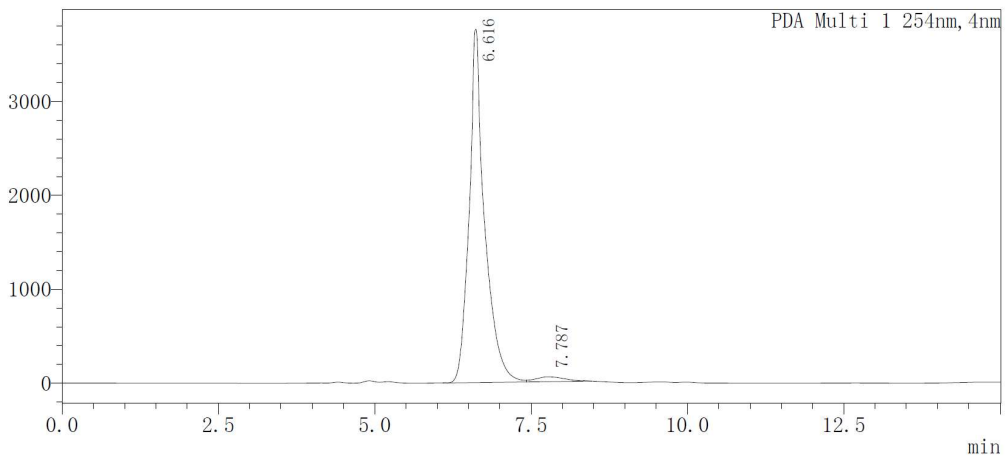

<峰表>

PDA Ch1 254nm

| 峰号 | 保留时间  | 面积       | 高度      | 浓度    | 浓度单位 | 标记  | 化合物名 |
|----|-------|----------|---------|-------|------|-----|------|
| 1  | 6.616 | 64971184 | 3764070 | 0.000 |      | M   |      |
| 2  | 7.787 | 1693462  | 53356   | 0.000 |      | V M |      |
| 总计 |       | 66664646 | 3817426 |       |      |     |      |

peak number

area

height

retention time

methyl ((*E*)-3-(4-cyanophenyl)-3-((3*aR*,6*aR*)-3*a*-hydroxy-3-(4-methoxyphenyl)-6*a*-methyl-6-oxo-1,3*a*,4,5,6,6*a*-hexahydropentalen-2-yl)allyl)(tosyl)carbamate

(**5bh**)

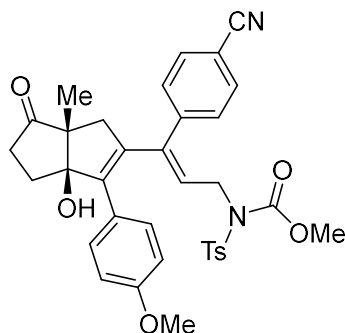

Chemical Formula: C<sub>35</sub>H<sub>34</sub>N<sub>2</sub>O<sub>7</sub>S

Exact Mass: 626.2087

**5bh** was prepared according to general procedure 2.2 using **1b** and **4h** and was purified by silica gel column chromatography (PE/EtOAc = 5/1~2/1) to obtain **5bh** as yellow oil (30% yield). <sup>1</sup>H NMR (600 MHz, CDCl<sub>3</sub>) δ 7.71-7.67 (m, 2H), 7.38-7.35 (m, 2H), 7.31-7.28 (m, 2H), 7.01-6.97 (m, 2H), 6.84-6.80 (m, 2H), 6.60-6.57 (m, 2H), 5.82 (dd, *J* = 6.9, 5.9 Hz, 1H), 4.31 (dd, *J* = 16.7, 5.9 Hz, 1H), 4.21 (dd, *J* = 16.6, 6.9 Hz, 1H), 3.73 (s, 3H), 3.60 (s, 3H), 2.91 (d, *J* = 16.6 Hz, 1H), 2.60 (d, *J* = 16.6 Hz, 1H), 2.48-2.43 (m, 1H), 2.44 (s, 3H), 2.07-2.00 (m, 2H), 1.88-1.83 (m, 1H), 1.79 (s, 1H), 1.18 (s, 3H); <sup>13</sup>C NMR (151 MHz, CDCl<sub>3</sub>) δ 221.1, 158.8, 152.4, 144.9, 143.3, 142.5, 141.2, 138.6, 136.2, 131.5, 130.0, 130.0, 129.8, 129.4, 128.2, 126.8, 118.6, 113.4, 110.8, 92.4, 55.8, 55.2, 53.8, 45.6, 44.1, 36.5, 29.5, 21.7, 15.3; HRMS: (ESI) calcd for C<sub>35</sub>H<sub>35</sub>N<sub>2</sub>O<sub>7</sub>S<sup>+</sup> [M+H]<sup>+</sup> 627.2159; found 627.2151. The enantiomeric purity was established by HPLC analysis using a chiral column: AD-H column, 30 °C, *n*-Hexane/*i*-Propanol = 70/30 as eluent, 254 nm, 1 mL/min. tR = 10 min (minor), 16 min (major).

Optical Rotation: [α]<sub>D</sub><sup>31</sup> -19.0 (c 0.8, <sup>t</sup>PrOH) for 95%*ee*.

Absolute stereochemistry was determined through analogy with X-ray crystal diffraction study of **9**.



<色谱图> ← HPLC chromatogram  
mAU

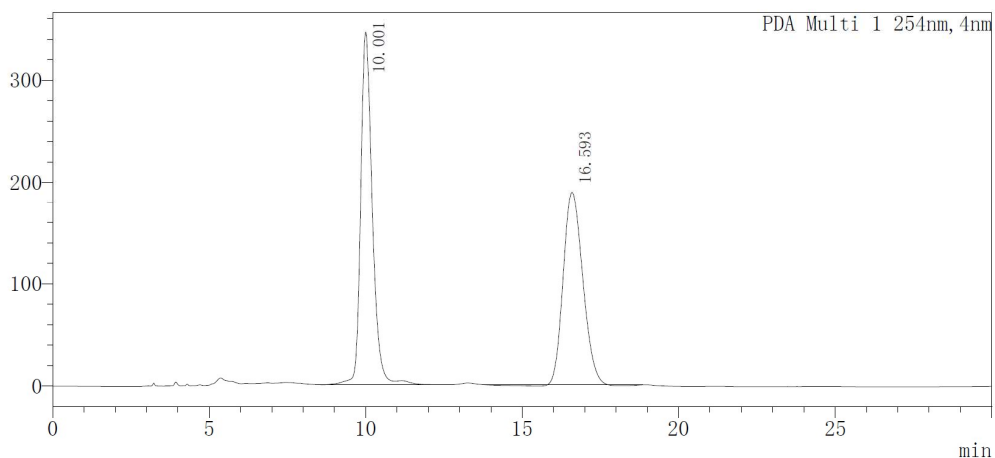

<峰表>

PDA Ch1 254nm

| 峰号 | 保留时间   | 面积       | 高度     | 浓度    | 浓度单位 | 标记 | 化合物名 |
|----|--------|----------|--------|-------|------|----|------|
| 1  | 10.001 | 8948637  | 345342 | 0.000 |      | M  |      |
| 2  | 16.593 | 8127679  | 189038 | 0.000 |      | M  |      |
| 总计 |        | 17076315 | 534380 |       |      |    |      |

↑ peak number

↑ area

↑ height

↑ retention time

<色谱图> ← HPLC chromatogram  
mAU

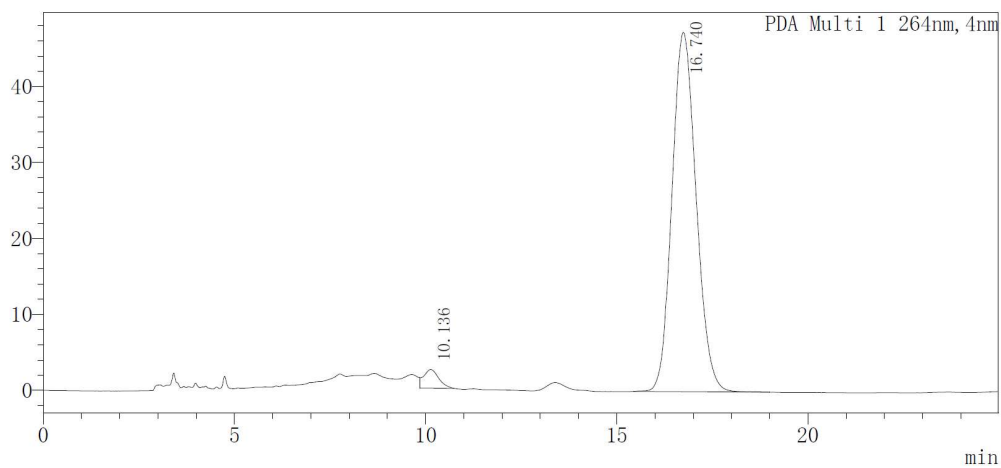

<峰表>

PDA Ch1 264nm

| 峰号 | 保留时间   | 面积      | 高度    | 浓度    | 浓度单位 | 标记 | 化合物名 |
|----|--------|---------|-------|-------|------|----|------|
| 1  | 10.136 | 66095   | 2438  | 0.000 |      | M  |      |
| 2  | 16.740 | 2078296 | 47308 | 0.000 |      | M  |      |
| 总计 |        | 2144392 | 49746 |       |      |    |      |

↑ peak number

↑ area

↑ height

↑ retention time

*N*-((*E*)-3-(4-cyanophenyl)-3-((3*aR*,6*aR*)-3*a*-hydroxy-3-(4-methoxyphenyl)-6*a*-methyl-6-oxo-1,3*a*,4,5,6,6*a*-hexahydropentalen-2-yl)allyl)-*N*,4-dimethylbenzenesulfonamide (**5bi**)

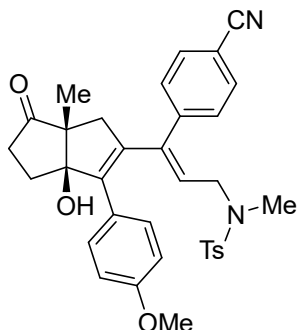

Chemical Formula: C<sub>34</sub>H<sub>34</sub>N<sub>2</sub>O<sub>5</sub>S

Exact Mass: 582.2188

**5bi** was prepared according to general procedure 2.2 using **1b** and **4i** and was purified by silica gel column chromatography (PE/EtOAc = 5/1~2/1) to obtain **5bi** (72% yield) and **5bi'** (18% yield). <sup>1</sup>H NMR (600 MHz, CDCl<sub>3</sub>) δ 7.55-7.50 (m, 2H), 7.37-7.32 (m, 2H), 7.28-.26 (m, 2H), 6.92-6.86 (m, 2H), 6.84-6.79 (m, 2H), 6.64-6.58 (m, 2H), 5.66 (dd, *J* = 7.4, 6.1 Hz, 1H), 3.74 (s, 3H), 3.63 (dd, *J* = 15.4, 6.1 Hz, 1H), 3.36 (dd, *J* = 15.4, 7.4 Hz, 1H), 2.76 (d, *J* = 16.7 Hz, 1H), 2.47 (d, *J* = 16.6 Hz, 1H), 2.42 (s, 3H), 2.38 (s, 3H), 2.05-1.98 (m, 2H), 1.93-1.80 (m, 2H), 1.14 (s, 3H); <sup>13</sup>C NMR (151 MHz, CDCl<sub>3</sub>) δ 221.0, 158.9, 143.6, 143.3, 142.1, 141.7, 139.6, 134.4, 131.6, 130.0, 129.7, 129.6, 129.4, 127.3, 126.9, 118.5, 113.5, 110.9, 92.2, 55.8, 55.3, 48.3, 44.1, 36.4, 34.5, 29.4, 21.5, 15.3; HRMS: (ESI) calcd for C<sub>34</sub>H<sub>35</sub>N<sub>2</sub>O<sub>5</sub>S<sup>+</sup> [M+H]<sup>+</sup> 583.2261; found 583.2257.

The enantiomeric purity was established by HPLC analysis using a chiral column: AD-H column, 30 °C, *n*-Hexane/*i*-Propanol = 70/30 as eluent, 254 nm, 1 mL/min. t<sub>R</sub> = 13 min (minor), 16 min (major).

Optical Rotation: [α]<sub>D</sub><sup>29</sup> -14.1 (c 1.7, <sup>t</sup>PrOH) for 97%ee.

Absolute stereochemistry was determined through analogy with X-ray crystal diffraction study of **9**.

<色谱图> ← HPLC chromatogram  
mAU

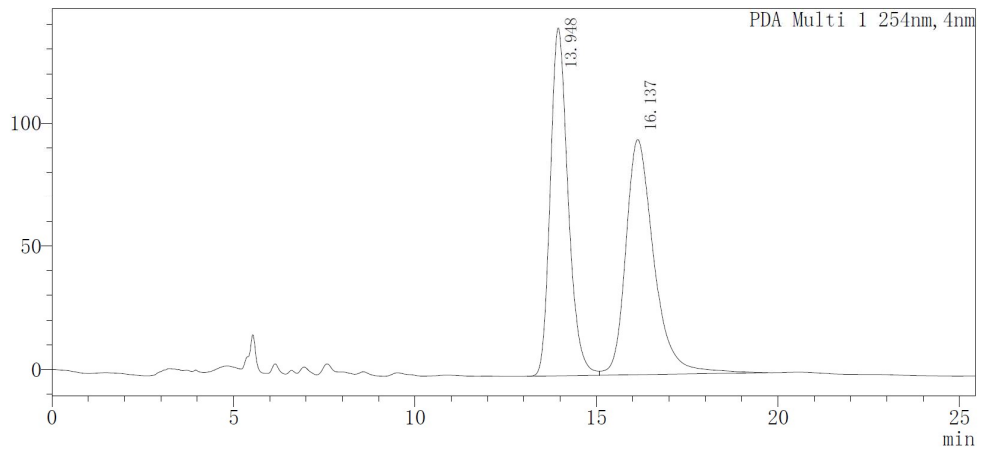

<峰表>

PDA Ch1 254nm

| 峰号 | 保留时间   | 面积      | 高度     | 浓度    | 浓度单位 | 标记 | 化合物名 |
|----|--------|---------|--------|-------|------|----|------|
| 1  | 13.948 | 4818122 | 141101 | 0.000 |      |    |      |
| 2  | 16.137 | 5162468 | 95501  | 0.000 |      | V  |      |
| 总计 |        | 9980590 | 236603 |       |      |    |      |

peak number

area

height

retention time

<色谱图> ← HPLC chromatogram  
mAU

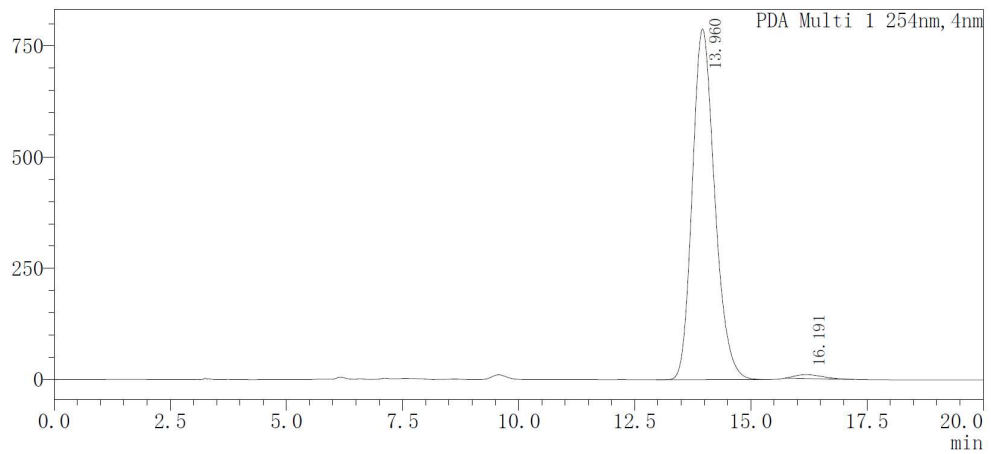

<峰表>

PDA Ch1 254nm

| 峰号 | 保留时间   | 面积       | 高度     | 浓度    | 浓度单位 | 标记 | 化合物名 |
|----|--------|----------|--------|-------|------|----|------|
| 1  | 13.960 | 26479203 | 788574 | 0.000 |      | M  |      |
| 2  | 16.191 | 360556   | 8682   | 0.000 |      | M  |      |
| 总计 |        | 26839759 | 797256 |       |      |    |      |

peak number

area

height

retention time

*N*-((*Z*)-3-(4-cyanophenyl)-2-((3*aR*,6*aR*)-3*a*-hydroxy-3-(4-methoxyphenyl)-6*a*-methyl-6-oxo-1,3*a*,4,5,6,6*a*-hexahydropentalen-2-yl)allyl)-*N*,4-dimethylbenzenesulfonamide (**5bi'**)

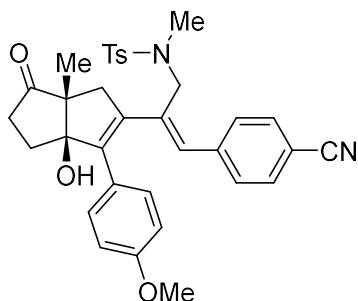

Chemical Formula: C<sub>34</sub>H<sub>34</sub>N<sub>2</sub>O<sub>5</sub>S  
Exact Mass: 582.2188

<sup>1</sup>H NMR (600 MHz, CDCl<sub>3</sub>) δ 7.57 (d, *J* = 8.0 Hz, 2H), 7.52 (d, *J* = 8.5 Hz, 2H), 7.37 (d, *J* = 8.1 Hz, 2H), 7.19 (d, *J* = 7.9 Hz, 2H), 7.15 (d, *J* = 8.0 Hz, 2H), 6.92 (d, *J* = 8.6 Hz, 2H), 6.75 (s, 1H), 3.86 (s, 3H), 3.53 (d, *J* = 14.0 Hz, 1H), 3.42 (d, *J* = 14.0 Hz, 1H), 3.02 (d, *J* = 17.0 Hz, 1H), 2.78 (d, *J* = 16.9 Hz, 1H), 2.45-2.41 (m, 1H), 2.37 (s, 3H), 2.27 (s, 3H), 2.22-2.17 (m, 1H), 2.07-2.02 (m, 1H), 2.01-1.95 (m, 1H), 1.89-1.82 (m, 1H), 1.21 (s, 3H); <sup>13</sup>C NMR (151 MHz, CDCl<sub>3</sub>) δ 222.7, 159.2, 143.7, 142.0, 141.9, 140.5, 137.5, 134.2, 132.7, 132.2, 130.1, 129.7, 129.4, 127.5, 127.1, 118.5, 113.6, 111.1, 92.2, 56.9, 55.3, 48.0, 46.8, 36.3, 34.8, 28.0, 21.5, 15.2; HRMS: (ESI) calcd for C<sub>34</sub>H<sub>35</sub>N<sub>2</sub>O<sub>5</sub>S<sup>+</sup>[M+H]<sup>+</sup> 583.2261; found 583.2274.

methyl (*E*)-5-(4-cyanophenyl)-5-((3*aR*,6*aR*)-3*a*-hydroxy-3-(4-methoxyphenyl)-6*a*-methyl-6-oxo-1,3*a*,4,5,6,6*a*-hexahydropentalen-2-yl)-2,2-dimethylpent-4-enoate

**(5bj)**

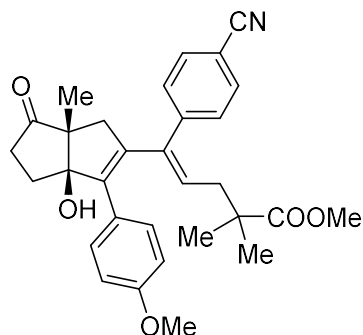

Chemical Formula: C<sub>31</sub>H<sub>33</sub>NO<sub>5</sub>  
Exact Mass: 499.2359

**5bj** was prepared according to general procedure 2.2 using **1b** and **4j** and was purified by silica gel column chromatography (PE/EtOAc = 5/1~4/1) to obtain **5bj** as yellow oil (67% yield). <sup>1</sup>H NMR (600 MHz, CDCl<sub>3</sub>) δ 7.39-7.33 (m, 2H), 6.94-6.89 (m, 2H), 6.87-6.80 (m, 2H), 6.67-6.61 (m, 2H), 5.74 (dd, *J* = 8.3, 6.7 Hz, 1H), 3.76 (s, 3H), 3.59 (s, 3H), 2.83 (d, *J* = 16.7 Hz, 1H), 2.53 (d, *J* = 16.7 Hz, 1H), 2.46-2.40 (m, 1H), 2.15 (dd, *J* = 14.9, 6.7 Hz, 1H), 2.08-2.00 (m, 3H), 1.87-1.80 (m, 1H), 1.75 (s, 1H), 1.15 (s, 3H), 0.96 (s, 3H), 0.93 (s, 3H). <sup>13</sup>C NMR (151 MHz, CDCl<sub>3</sub>) δ 221.4, 177.4, 158.8, 143.7, 142.7, 141.5, 138.0, 131.5, 130.1, 130.0, 127.4, 118.8, 113.5, 110.3, 92.3, 55.8, 55.3, 51.8, 44.3, 42.4, 39.1, 36.5, 29.4, 25.0, 24.7, 15.3; HRMS: (ESI) calcd for C<sub>31</sub>H<sub>37</sub>N<sub>2</sub>O<sub>5</sub><sup>+</sup>[M+NH<sub>4</sub>]<sup>+</sup> 517.2697; found 517.2684. The enantiomeric purity was established by HPLC analysis using a chiral column: AD-H column, 30 °C, *n*-Hexane/*i*-Propanol = 85/15 as eluent, 254 nm, 1 mL/min. tR = 8.0 min (major), 8.6 min (minor).

Optical Rotation: [α]<sub>D</sub><sup>29</sup> -100.1 (c 1.3, *i*-PrOH) for 95%ee.

Absolute stereochemistry was determined through analogy with X-ray crystal diffraction study of **9**.

<色谱图> ← HPLC chromatogram

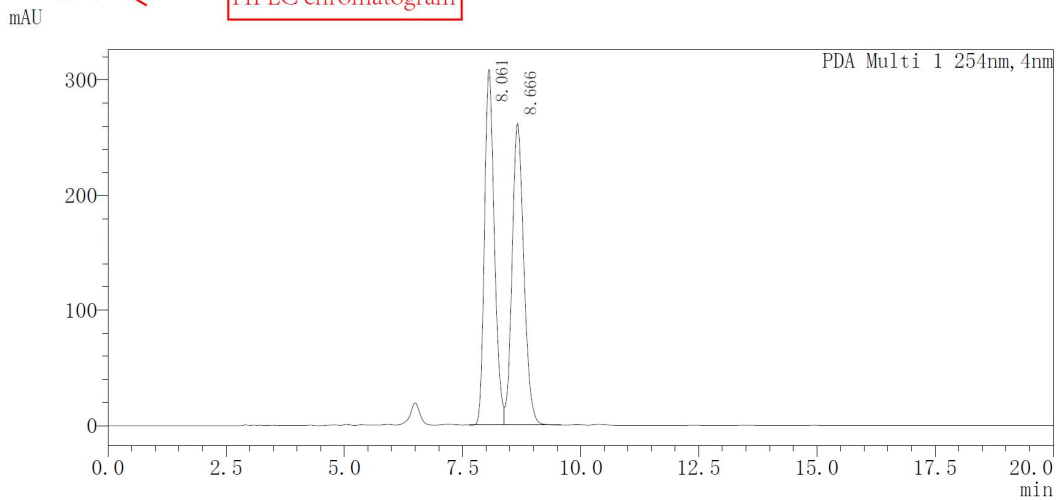

<峰表>

PDA Ch1 254nm

| 峰号 | 保留时间  | 面积      | 高度     | 浓度    | 浓度单位 | 标记  | 化合物名 |
|----|-------|---------|--------|-------|------|-----|------|
| 1  | 8.061 | 4486430 | 308688 | 0.000 |      | M   |      |
| 2  | 8.666 | 4530060 | 261789 | 0.000 |      | V M |      |
| 总计 |       | 9016489 | 570477 |       |      |     |      |

peak number  
retention time  
area  
height

<色谱图> ← HPLC chromatogram

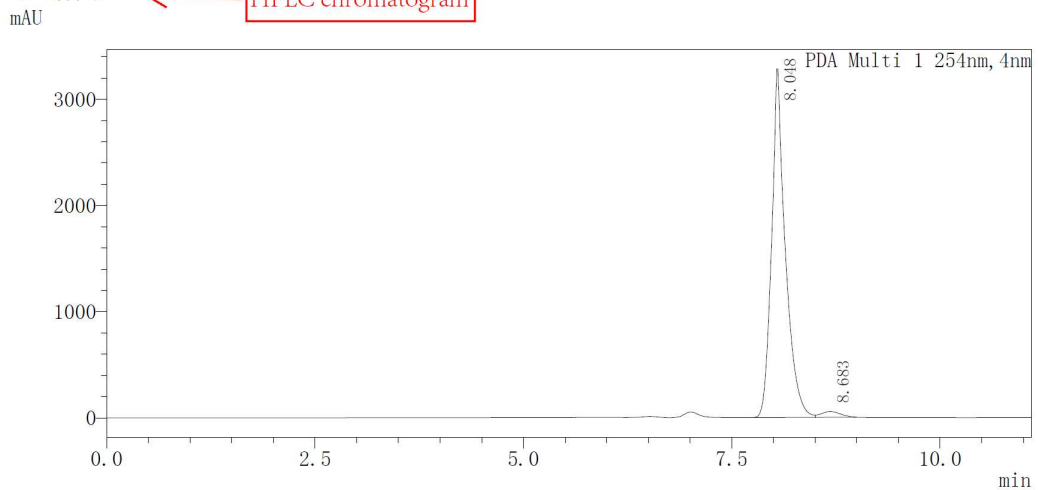

<峰表>

PDA Ch1 254nm

| 峰号 | 保留时间  | 面积       | 高度      | 浓度    | 浓度单位 | 标记  | 化合物名 |
|----|-------|----------|---------|-------|------|-----|------|
| 1  | 8.048 | 37487169 | 3284252 | 0.000 |      | M   |      |
| 2  | 8.683 | 868332   | 54049   | 0.000 |      | V M |      |
| 总计 |       | 38355501 | 3338301 |       |      |     |      |

peak number  
retention time  
area  
height

diethyl 2-((*E*)-3-(4-cyanophenyl)-3-((3*aR*,6*aR*)-3a-hydroxy-3-(4-methoxyphenyl)-6a-methyl-6-oxo-1,3a,4,5,6,6a-hexahydropentalen-2-yl)allyl)-2-methylmalonate (**5bk**)

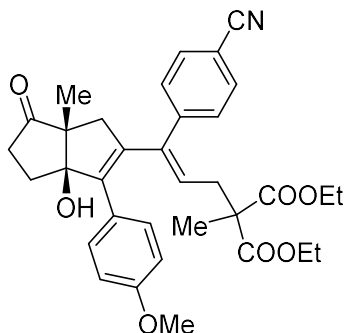

Chemical Formula: C<sub>34</sub>H<sub>37</sub>NO<sub>7</sub>

Exact Mass: 571.2570

**5bk** was prepared according to general procedure 2.2 using **1b** and **4k** and was purified by silica gel column chromatography (PE/EtOAc = 4/1~2/1) to obtain **5bk** as yellow oil (63% yield). <sup>1</sup>H NMR (400 MHz, CDCl<sub>3</sub>) δ 7.36-7.31 (m, 2H), 6.92-6.87 (m, 2H), 6.83-6.79 (m, 2H), 6.63-6.58 (m, 2H), 5.71 (dd, *J* = 8.1, 6.8 Hz, 1H), 4.14-4.02 (m, 4H), 3.74 (s, 3H), 2.84 (d, *J* = 16.7 Hz, 1H), 2.53 (d, *J* = 16.7 Hz, 1H), 2.49-2.35 (m, 3H), 2.04-1.93 (m, 3H), 1.87-1.78 (m, 1H), 1.24 (s, 2H), 1.21-1.15 (m, 6H), 1.14 (s, 3H), 1.13 (s, 3H); <sup>13</sup>C NMR (101 MHz, CDCl<sub>3</sub>) δ 221.4, 171.4, 171.4, 158.8, 143.3, 142.4, 142.0, 139.0, 131.5, 130.0, 129.9, 129.6, 127.2, 118.7, 113.4, 110.3, 92.2, 61.4, 61.4, 55.8, 55.2, 53.2, 44.3, 36.5, 34.7, 29.4, 19.7, 15.3, 14.0, 13.9; HRMS: (ESI) calcd for C<sub>34</sub>H<sub>37</sub>NO<sub>7</sub>Na<sup>+</sup> [M+Na]<sup>+</sup> 594.2462; found 594.2452.

The enantiomeric purity was established by HPLC analysis using a chiral column: OD-H column, 30 °C, *n*-Hexane/*i*-Propanol = 90/10 as eluent, 254 nm, 1 mL/min. t<sub>R</sub> = 12 min (minor), 15 min (major).

Optical Rotation: [α]<sub>D</sub><sup>30</sup> -9.4 (c 0.7, *i*PrOH) for 92%ee.

Absolute stereochemistry was determined through analogy with X-ray crystal diffraction study of **9**.

<色谱图>  
mAU

HPLC chromatogram

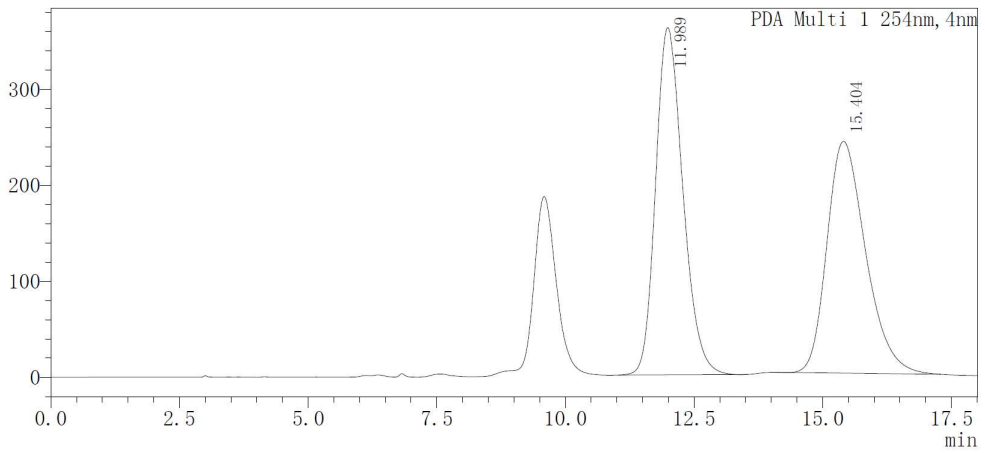

<峰表>

PDA Ch1 254nm

| 峰号 | 保留时间   | 面积       | 高度     | 浓度    | 浓度单位 | 标记 | 化合物名 |
|----|--------|----------|--------|-------|------|----|------|
| 1  | 11.989 | 13357556 | 361706 | 0.000 |      | M  |      |
| 2  | 15.404 | 12644370 | 241410 | 0.000 |      | M  |      |
| 总计 |        | 26001925 | 603116 |       |      |    |      |

peak number

area

height

retention time

<色谱图>

mAU

HPLC chromatogram

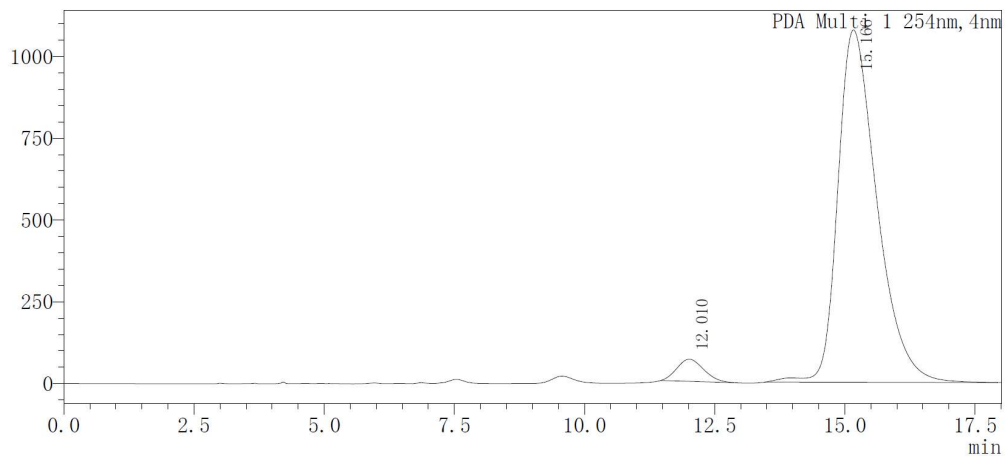

<峰表>

PDA Ch1 254nm

| 峰号 | 保留时间   | 面积       | 高度      | 浓度    | 浓度单位 | 标记 | 化合物名 |
|----|--------|----------|---------|-------|------|----|------|
| 1  | 12.010 | 2419969  | 67590   | 0.000 |      | M  |      |
| 2  | 15.166 | 56360081 | 1078101 | 0.000 |      | M  |      |
| 总计 |        | 58780050 | 1145692 |       |      |    |      |

peak number

area

height

retention time



dimethyl 2-allyl-2-((*E*)-3-(4-cyanophenyl)-3-((3*aR*,6*aR*)-3*a*-hydroxy-3-(4-methoxyphenyl)-6*a*-methyl-6-oxo-1,3*a*,4,5,6,6*a*-hexahydropentalen-2-yl)allyl)malonate

**(5bl)**

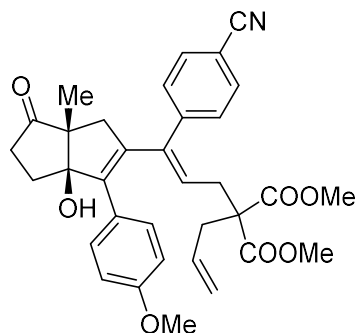

Chemical Formula: C<sub>34</sub>H<sub>35</sub>NO<sub>7</sub>  
Exact Mass: 569.2414

**5bl** was prepared according to general procedure 2.2 using **1b** and **4l** and was purified by silica gel column chromatography (PE/EtOAc = 5/1~3/1) to obtain **5bl** as yellow oil (70% yield). <sup>1</sup>H NMR (400 MHz, CDCl<sub>3</sub>) δ 7.39-7.33 (m, 2H), 6.94-6.90 (m, 2H), 6.87-6.82 (m, 2H), 6.67-6.61 (m, 2H), 5.63 (dd, *J* = 8.3, 6.6 Hz, 1H), 5.32-5.20 (m, 1H), 4.93-4.83 (m, 2H), 3.74 (s, 3H), 3.65 (s, 3H), 3.59 (s, 3H), 2.81 (d, *J* = 16.7 Hz, 1H), 2.53-2.29 (m, 6H), 2.06-1.93 (m, 3H), 1.87-1.78 (m, 1H), 1.14 (s, 3H); <sup>13</sup>C NMR (101 MHz, CDCl<sub>3</sub>) δ 221.4, 170.7, 170.7, 158.8, 143.1, 142.4, 142.1, 139.1, 131.7, 131.5, 130.0, 129.9, 128.9, 127.2, 119.3, 118.7, 113.6, 110.4, 92.2, 57.3, 55.8, 55.2, 52.5, 52.4, 44.3, 36.8, 36.5, 31.7, 29.4, 15.3; HRMS: (ESI) calcd for C<sub>34</sub>H<sub>35</sub>NO<sub>7</sub>Na<sup>+</sup> [M+Na]<sup>+</sup> 592.2306; found 592.2317.

The enantiomeric purity was established by HPLC analysis using a chiral column: AD-H column, 30 °C, *n*-Hexane/*i*-Propanol = 80/20 as eluent, 254 nm, 1 mL/min. tR = 7.0 min (minor), 7.6 min (major).

Optical Rotation: [α]<sub>D</sub><sup>28</sup> 2.8 (c 1.6, *i*PrOH) for 94%ee.

Absolute stereochemistry was determined through analogy with X-ray crystal diffraction study of **9**.

<色谱图>  
mAU

← HPLC chromatogram

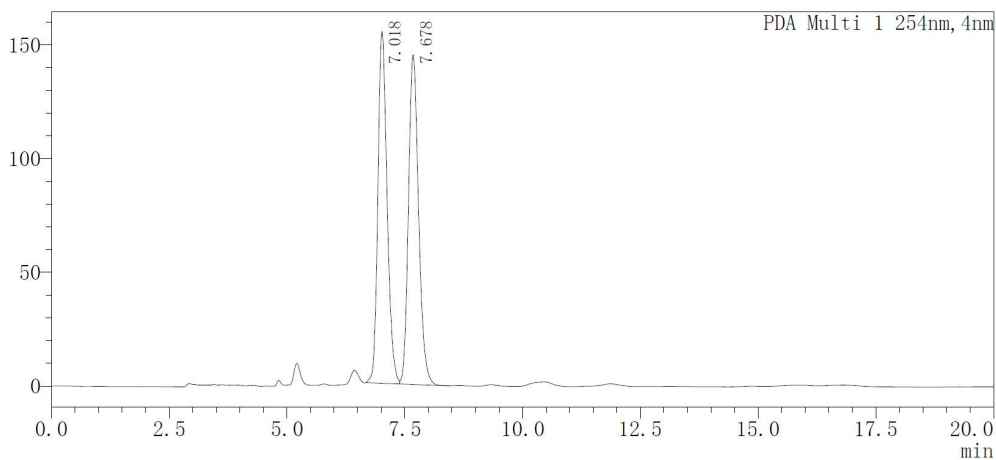

<峰表>

PDA Ch1 254nm

| 峰号 | 保留时间  | 面积      | 高度     | 浓度    | 浓度单位 | 标记  | 化合物名 |
|----|-------|---------|--------|-------|------|-----|------|
| 1  | 7.018 | 2097462 | 154665 | 0.000 |      | M   |      |
| 2  | 7.678 | 2167208 | 144997 | 0.000 |      | V M |      |
| 总计 |       | 4264670 | 299662 |       |      |     |      |

↑ peak number

↑ retention time

↑ area

↑ height

<色谱图>  
mAU

← HPLC chromatogram

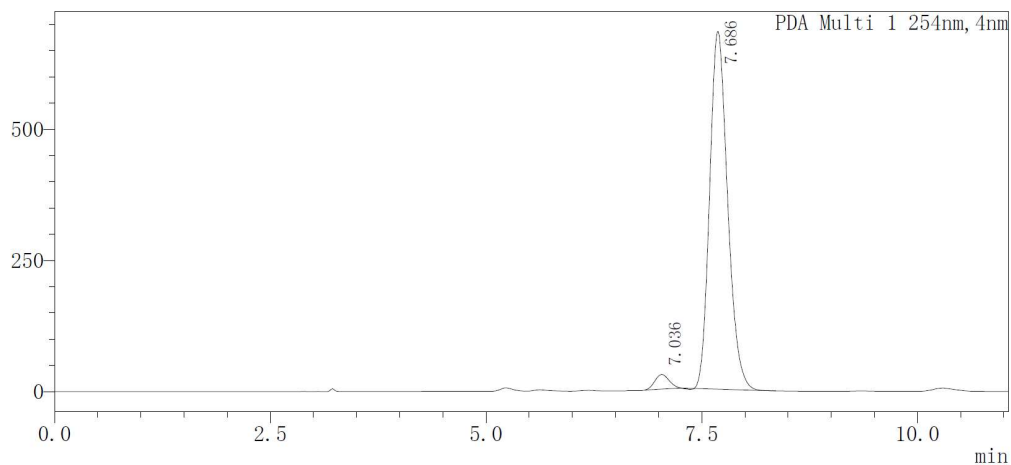

<峰表>

PDA Ch1 254nm

| 峰号 | 保留时间  | 面积       | 高度     | 浓度    | 浓度单位 | 标记 | 化合物名 |
|----|-------|----------|--------|-------|------|----|------|
| 1  | 7.036 | 320127   | 27612  | 0.000 |      | M  |      |
| 2  | 7.686 | 9899973  | 682095 | 0.000 |      | M  |      |
| 总计 |       | 10220100 | 709707 |       |      |    |      |

↑ peak number

↑ retention time

↑ area

↑ height

4-((*E*)-1-((3*aR*,6*aR*)-3*a*-hydroxy-3-(4-methoxyphenyl)-6*a*-methyl-6-oxo-1,3*a*,4,5,6,6*a*-hexahydropentalen-2-yl)-3-(1-methyl-2,5-dioxocyclopentyl)prop-1-en-1-yl)benzonitrile (**5bm**)

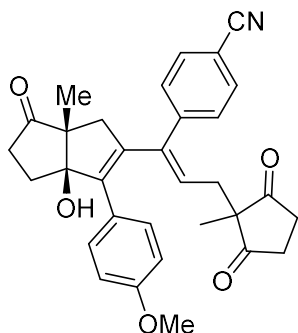

Chemical Formula: C<sub>32</sub>H<sub>31</sub>NO<sub>5</sub>

Exact Mass: 509.2202

**5bm** was prepared according to general procedure 2.2 using **1b** and **4m** and was purified by silica gel column chromatography (PE/EtOAc = 3/1~1.5/1) to obtain **5bm** as yellow oil (63% yield). <sup>1</sup>H NMR (400 MHz, CDCl<sub>3</sub>) δ 7.41-7.34 (m, 2H), 6.94-6.88 (m, 2H), 6.87-6.80 (m, 2H), 6.68-6.60 (m, 2H), 5.51 (dd, *J* = 8.0, 6.9 Hz, 1H), 3.75 (s, 3H), 2.75 (d, *J* = 16.7 Hz, 1H), 2.71-2.61 (m, 2H), 2.50-2.36 (m, 4H), 2.17 (dd, *J* = 7.5, 4.6 Hz, 2H), 2.08-1.93 (m, 3H), 1.85-1.76 (m, 1H), 1.11 (s, 3H), 0.92 (s, 3H); <sup>13</sup>C NMR (101 MHz, CDCl<sub>3</sub>) δ 221.3, 215.2, 214.9, 158.8, 142.8, 142.2, 142.00, 139.6, 131.6, 130.0, 129.9, 127.7, 127.2, 118.6, 113.5, 110.6, 92.2, 56.2, 55.8, 55.2, 44.2, 36.4, 35.0, 34.9, 33.8, 29.3, 19.1, 15.3; HRMS: (ESI) calcd for C<sub>32</sub>H<sub>32</sub>NO<sub>5</sub><sup>+</sup> [M+H]<sup>+</sup> 510.2275; found 510.2285.

The enantiomeric purity was established by HPLC analysis using a chiral column: AD-H column, 30 °C, *n*-Hexane/*i*-Propanol = 70/30 as eluent, 254 nm, 1 mL/min. tR = 10 min (minor), 15 min (major).

Optical Rotation: [α]<sub>D</sub><sup>31</sup> 30.9 (c 1.3, *i*PrOH) for 92% ee.

Absolute stereochemistry was determined through analogy with X-ray crystal diffraction study of **9**.

<色谱图>

mAU

← HPLC chromatogram

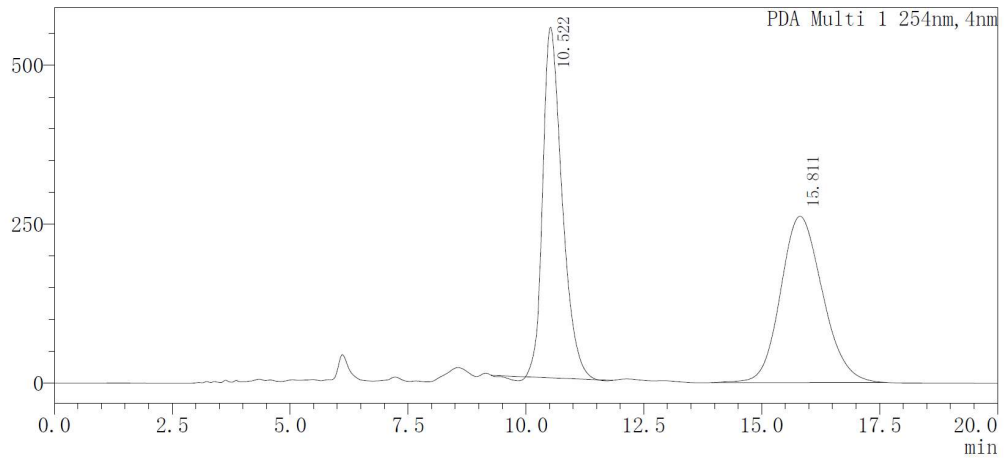

<峰表>

PDA Ch1 254nm

| 峰号 | 保留时间   | 面积       | 高度     | 浓度    | 浓度单位 | 标记 | 化合物名 |
|----|--------|----------|--------|-------|------|----|------|
| 1  | 10.522 | 15677014 | 551542 | 0.000 |      | M  |      |
| 2  | 15.811 | 16190250 | 261517 | 0.000 |      | M  |      |
| 总计 |        | 31867265 | 813059 |       |      |    |      |

↑ peak number

↑ retention time

↑ area

↑ height

<色谱图>

mAU

← HPLC chromatogram

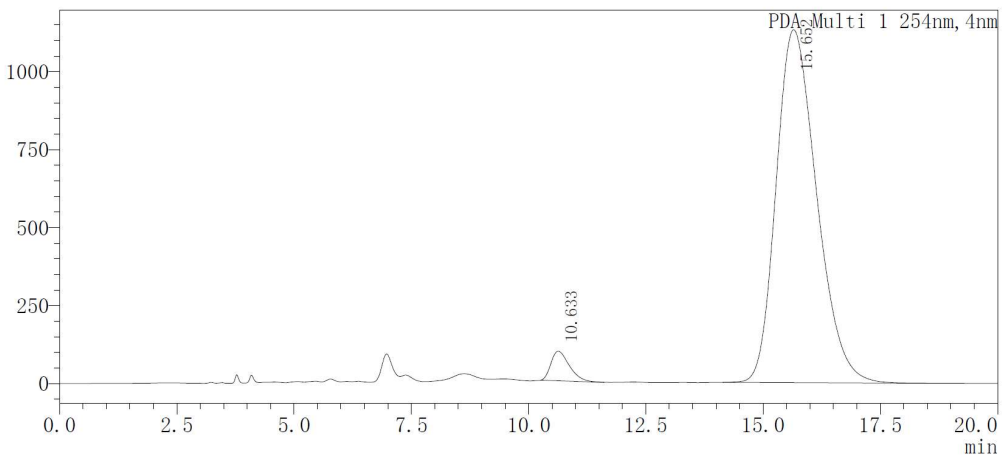

<峰表>

PDA Ch1 254nm

| 峰号 | 保留时间   | 面积       | 高度      | 浓度    | 浓度单位 | 标记 | 化合物名 |
|----|--------|----------|---------|-------|------|----|------|
| 1  | 10.633 | 2574034  | 94719   | 0.000 |      | M  |      |
| 2  | 15.652 | 68126401 | 1132239 | 0.000 |      | M  |      |
| 总计 |        | 70700435 | 1226958 |       |      |    |      |

↑ peak number

↑ retention time

↑ area

↑ height

4-((*E*)-1-((3*aR*,6*aR*)-3*a*-hydroxy-6*a*-methyl-6-oxo-3-phenyl-1,3*a*,4,5,6,6*a*-hexahydropentalen-2-yl)-3-(1-methyl-2,5-dioxocyclopentyl)prop-1-en-1-yl)benzonitrile  
(**5an**)

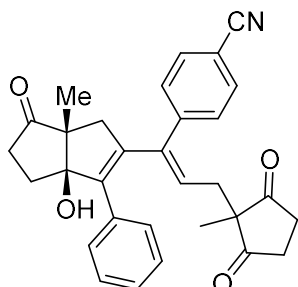

Chemical Formula: C<sub>31</sub>H<sub>29</sub>NO<sub>4</sub>  
Exact Mass: 479.2097

**5an** was prepared according to general procedure 2.2 using **1a** and **4n** and was purified by silica gel column chromatography (PE/EtOAc = 4/1~1.5/1) to obtain **5an** as yellow oil (60% yield). <sup>1</sup>H NMR (400 MHz, CDCl<sub>3</sub>) δ 7.38-7.34 (m, 2H), 7.16-7.09 (m, 3H), 6.94-6.87 (m, 4H), 5.53 (t, *J* = 7.5 Hz, 1H), 2.77 (d, *J* = 16.7 Hz, 1H), 2.70-2.61 (m, 2H), 2.49 (d, *J* = 16.7 Hz, 1H), 2.45-2.34 (m, 3H), 2.19-2.11 (m, 2H), 2.06-1.92 (m, 3H), 1.86-1.76 (m, 1H), 1.13 (s, 4H), 0.91 (s, 4H); <sup>13</sup>C NMR (101 MHz, CDCl<sub>3</sub>) δ 221.2, 215.1, 214.9, 142.6, 142.5, 142.3, 139.4, 135.1, 131.6, 129.9, 128.9, 128.0, 127.9, 127.2, 110.7, 92.3, 56.2, 55.9, 44.2, 36.4, 35.0, 34.9, 33.7, 29.3, 19.1, 15.3; HRMS: (ESI) calcd for C<sub>31</sub>H<sub>30</sub>NO<sub>4</sub><sup>+</sup> [M+H]<sup>+</sup> 480.2169; found 480.2170.

The enantiomeric purity was established by HPLC analysis using a chiral column: AD-H column, 30 °C, *n*-Hexane/*i*-Propanol = 70/30 as eluent, 254 nm, 1 mL/min. tR = 14 min (minor), 16 min (major).

Optical Rotation: [α]<sub>D</sub><sup>31</sup> 28.9 (c 1.2, *i*PrOH) for 94%ee.

Absolute stereochemistry was determined through analogy with X-ray crystal diffraction study of **9**.

<色谱图> ← HPLC chromatogram

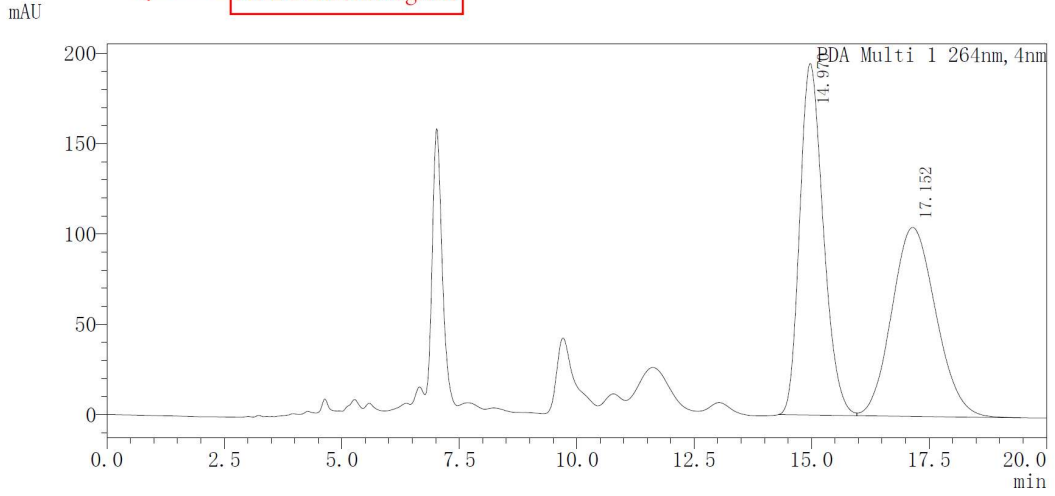

<峰表>

PDA Ch1 264nm

| 峰号 | 保留时间   | 面积       | 高度     | 浓度     | 浓度单位 | 标记  | 化合物名 |
|----|--------|----------|--------|--------|------|-----|------|
| 1  | 14.970 | 6808925  | 194664 | 49.905 |      | M   |      |
| 2  | 17.152 | 6834881  | 104653 | 50.095 |      | V M |      |
| 总计 |        | 13643806 | 299316 |        |      |     |      |

peak number

retention time

area

height

<色谱图> ← HPLC chromatogram

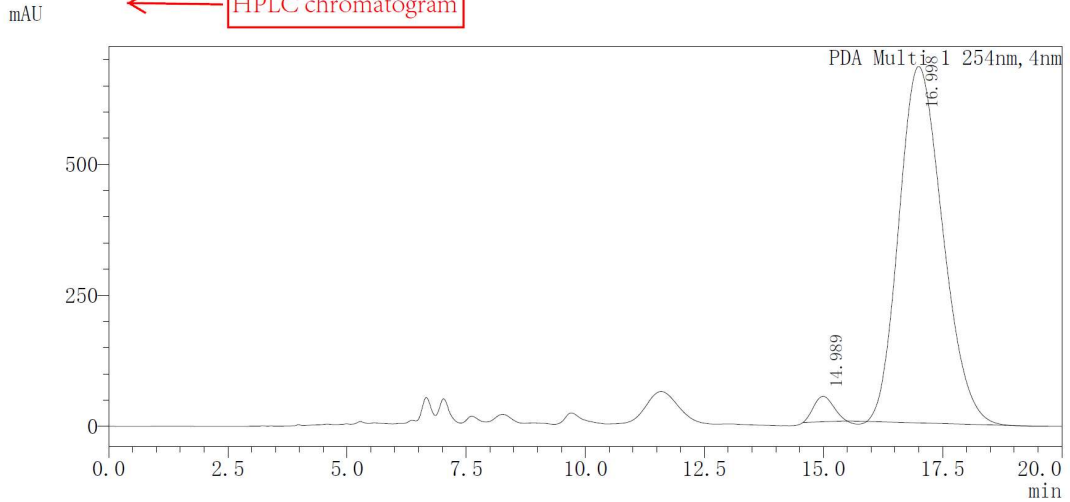

<峰表>

PDA Ch1 254nm

| 峰号 | 保留时间   | 面积       | 高度     | 浓度    | 浓度单位 | 标记 | 化合物名 |
|----|--------|----------|--------|-------|------|----|------|
| 1  | 14.989 | 1400815  | 48508  | 0.000 |      | M  |      |
| 2  | 16.998 | 43287774 | 680417 | 0.000 |      | M  |      |
| 总计 |        | 44688589 | 728925 |       |      |    |      |

peak number

retention time

area

height

2-((*E*)-3-((3*aR*,6*aR*)-3*a*-hydroxy-3-(4-methoxyphenyl)-6*a*-methyl-6-oxo-1,3*a*,4,5,6,6*a*-hexahydropentalen-2-yl)-3-phenylallyl)-2-methylcyclopentane-1,3-dione (**5bo**)

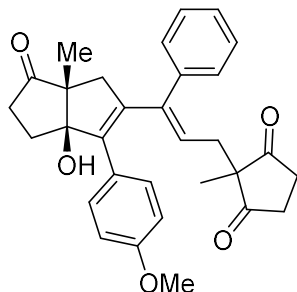

Chemical Formula: C<sub>31</sub>H<sub>32</sub>O<sub>5</sub>

Exact Mass: 484.2250

**5bo** was prepared according to general procedure 2.2 using **1b** and **4o** and was purified by silica gel column chromatography (PE/EtOAc = 3/1~1.5/1) to obtain **5bo** as yellow oil (53% yield). <sup>1</sup>H NMR (400 MHz, CDCl<sub>3</sub>) δ 7.20-7.13 (m, 3H), 7.08-7.04 (m, 2H), 6.88-6.84 (m, 2H), 6.76-6.73 (m, 2H), 5.37 (t, *J* = 7.4 Hz, 1H), 3.77 (s, 3H), 2.68 (d, *J* = 16.9 Hz, 1H), 2.59-2.52 (m, 2H), 2.42-2.35 (m, 2H), 2.31-2.22 (m, 4H), 2.06-1.99 (m, 2H), 1.92-1.81 (m, 2H), 1.09 (s, 3H), 0.87 (s, 3H); <sup>13</sup>C NMR (101 MHz, CDCl<sub>3</sub>) δ 221.5, 215.4, 215.0, 158.7, 143.8, 140.8, 140.7, 137.5, 130.0, 128.8, 128.1, 127.7, 127.1, 125.9, 113.7, 92.4, 56.4, 56.0, 55.2, 44.6, 36.7, 35.0, 34.8, 34.4, 29.2, 18.3, 15.4; HRMS: (ESI) calcd for C<sub>31</sub>H<sub>32</sub>O<sub>5</sub>Na<sup>+</sup> [M+Na]<sup>+</sup> 507.2142; found 507.2155.

The enantiomeric purity was established by HPLC analysis using a chiral column: AD-H column, 30 °C, *n*-Hexane/*i*-Propanol = 80/20 as eluent, 254 nm, 1 mL/min. t<sub>R</sub> = 11 min (minor), 12 min (major).

Optical Rotation: [α]<sub>D</sub><sup>29</sup> 37.5 (c 1.0, *i*PrOH) for 94%ee.

Absolute stereochemistry was determined through analogy with X-ray crystal diffraction study of **9**.

<色谱图>

mAU

← HPLC chromatogram

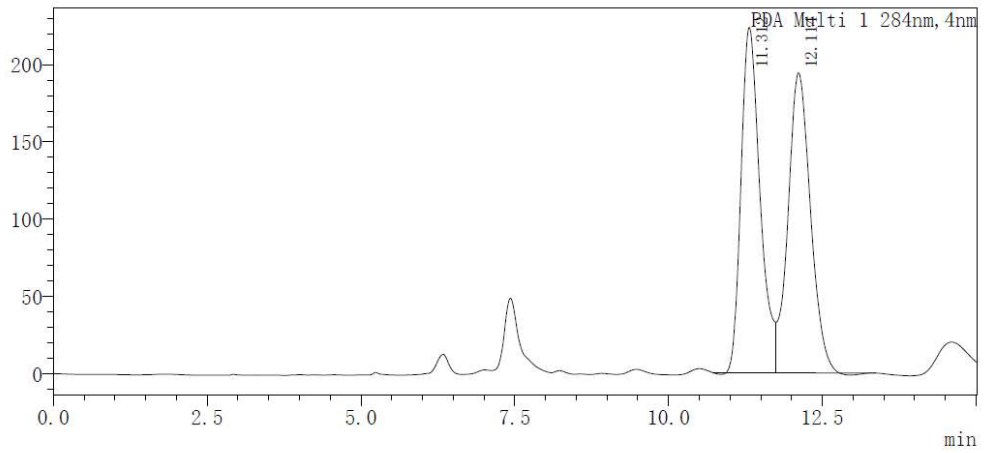

<峰表>

PDA Ch1 284nm

| 峰号 | 保留时间   | 面积      | 高度     | 浓度    | 浓度单位 | 标记  | 化合物名 |
|----|--------|---------|--------|-------|------|-----|------|
| 1  | 11.312 | 4821440 | 223519 | 0.000 |      | M   |      |
| 2  | 12.114 | 4920245 | 194202 | 0.000 |      | V M |      |
| 总计 |        | 9741685 | 417721 |       |      |     |      |

↑ peak number

↑ area

↑ height

↑ retention time

<色谱图>

mAU

← HPLC chromatogram

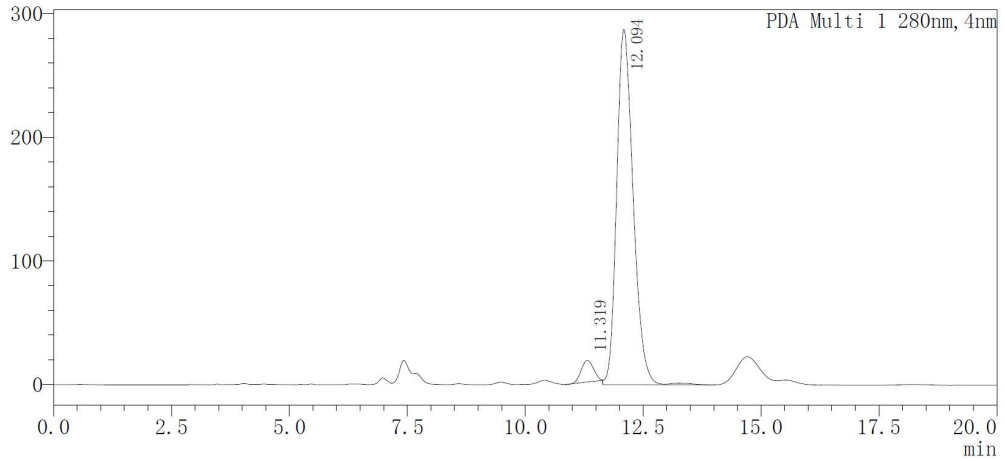

<峰表>

PDA Ch1 280nm

| 峰号 | 保留时间   | 面积      | 高度     | 浓度    | 浓度单位 | 标记 | 化合物名 |
|----|--------|---------|--------|-------|------|----|------|
| 1  | 11.319 | 318105  | 17453  | 0.000 |      | M  |      |
| 2  | 12.094 | 6995801 | 287198 | 0.000 |      | M  |      |
| 总计 |        | 7313906 | 304651 |       |      |    |      |

↑ peak number

↑ area

↑ height

↑ retention time



4-((*E*)-5-hydroxy-1-((3*aR*,6*aR*)-3a-hydroxy-3-(4-methoxyphenyl)-6a-methyl-6-oxo-1,3a,4,5,6,6a-hexahydropentalen-2-yl)-4,4-dimethylpent-1-en-1-yl)benzonitrile (**5bp**)

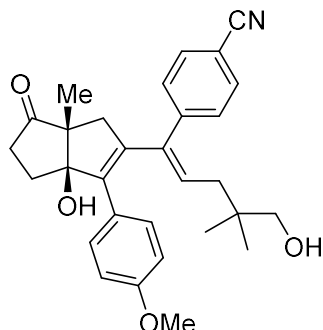

Chemical Formula: C<sub>30</sub>H<sub>33</sub>NO<sub>4</sub>

Exact Mass: 471.2410

**5bp** was prepared according to general procedure 2.2 using **1b** and **4p** and was purified by silica gel column chromatography (PE/EtOAc = 4/1~1/1) to obtain **5bp** as yellow oil (80% yield). <sup>1</sup>H NMR (600 MHz, CDCl<sub>3</sub>) δ 7.40-7.35 (m, 2H), 6.97-6.93 (m, 2H), 6.92-6.87 (m, 2H), 6.69-6.64 (m, 2H), 5.86 (dd, *J* = 8.5, 7.0 Hz, 1H), 3.75 (s, 3H), 3.05 (dd, *J* = 2.4 Hz, 2H), 2.82 (d, *J* = 16.7 Hz, 1H), 2.52 (d, *J* = 16.7 Hz, 1H), 2.46-2.40 (m, 1H), 2.09-2.00 (m, 2H), 1.90-1.78 (m, 4H), 1.15 (s, 3H), 0.66 (s, 3H), 0.64 (s, 3H). <sup>13</sup>C NMR (151 MHz, CDCl<sub>3</sub>) δ 221.5, 158.8, 143.8, 143.2, 141.2, 137.4, 132.5, 131.5, 130.1, 130.0, 127.6, 118.8, 113.6, 110.2, 92.2, 71.2, 55.88, 55.31, 44.4, 37.4, 36.5, 36.1, 29.4, 23.7, 23.7, 15.3; HRMS: (ESI) calcd for C<sub>30</sub>H<sub>33</sub>NO<sub>4</sub>Na<sup>+</sup>[M+Na]<sup>+</sup> 494.2302; found 494.2292.

The enantiomeric purity was established by HPLC analysis using a chiral column: AD-H column, 30 °C, *n*-Hexane/*i*-Propanol = 70/30 as eluent, 254 nm, 1 mL/min. t<sub>R</sub> = 5.8 min (major), 8.6 min (minor).

Optical Rotation: [α]<sub>D</sub><sup>30</sup> -42.7 (c 1.5, *i*PrOH) for 94%ee.

Absolute stereochemistry was determined through analogy with X-ray crystal diffraction study of **9**.

<色谱图>

mAU

HPLC chromatogram

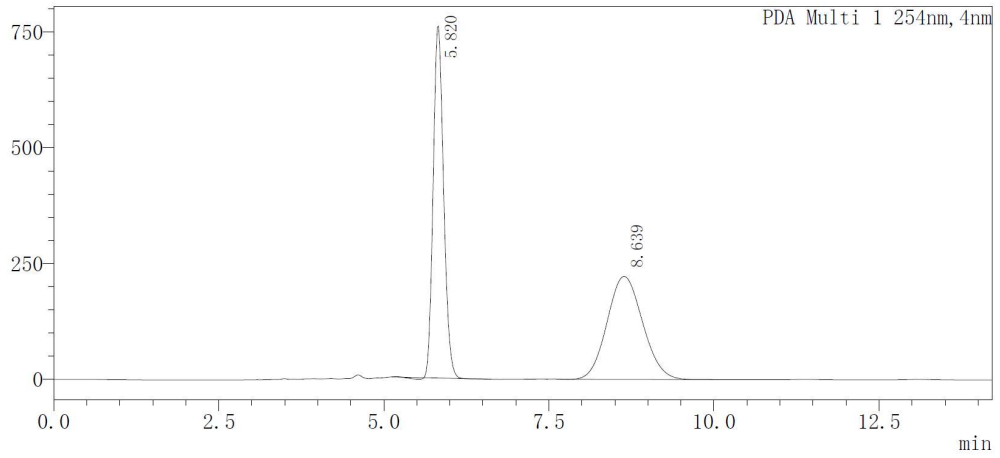

<峰表>

PDA Ch1 254nm

| 峰号 | 保留时间  | 面积       | 高度     | 浓度    | 浓度单位 | 标记 | 化合物名 |
|----|-------|----------|--------|-------|------|----|------|
| 1  | 5.820 | 8310073  | 759817 | 0.000 |      | M  |      |
| 2  | 8.639 | 8336773  | 222527 | 0.000 |      | M  |      |
| 总计 |       | 16646846 | 982343 |       |      |    |      |

peak number

area

height

retention time

<色谱图>

mAU

HPLC chromatogram

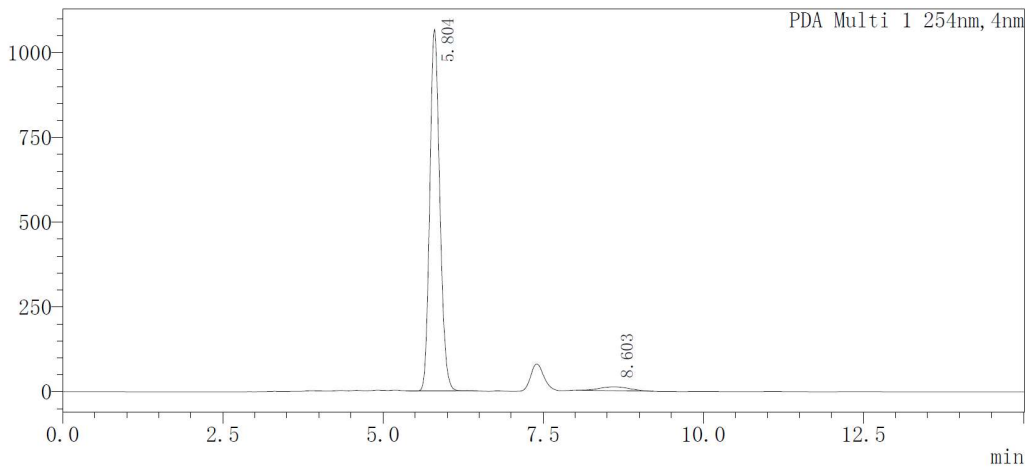

<峰表>

PDA Ch1 254nm

| 峰号 | 保留时间  | 面积       | 高度      | 浓度    | 浓度单位 | 标记 | 化合物名 |
|----|-------|----------|---------|-------|------|----|------|
| 1  | 5.804 | 11612080 | 1067326 | 0.000 |      | M  |      |
| 2  | 8.603 | 371318   | 11590   | 0.000 |      | M  |      |
| 总计 |       | 11983399 | 1078916 |       |      |    |      |

peak number

area

height

retention time

---

(3*aR*,6*aR*)-5-((*E*)-1,2-diphenylvinyl)-3*a*-hydroxy-6*a*-methyl-4-phenyl-3,3*a*,6,6*a*-tetrahydropentalen-1(2*H*)-one (**5aq**)

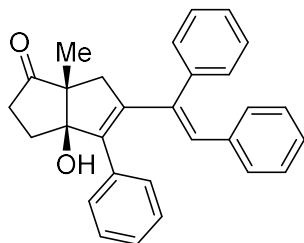

Chemical Formula: C<sub>29</sub>H<sub>26</sub>O<sub>2</sub>  
Exact Mass: 406.1933

**5aq** was prepared according to general procedure 2.2 using **1a** and **4q** and was purified by silica gel column chromatography (PE/EtOAc = 15/1~10/1) to obtain **5aq** as faint yellow solid (71% yield). <sup>1</sup>H NMR (400 MHz, CDCl<sub>3</sub>) δ 7.28-7.25 (m, 2H), 7.20-7.10 (m, 6H), 7.06-7.01 (m, 3H), 6.97-6.92 (m, 2H), 6.82-6.77 (m, 2H), 6.54 (s, 1H), 2.90 (d, *J* = 17.0 Hz, 1H), 2.57 (d, *J* = 17.0 Hz, 1H), 2.50-2.41 (m, 1H), 2.21-2.05 (m, 3H), 1.98-1.88 (m, 1H), 1.17 (s, 3H); <sup>13</sup>C NMR (101 MHz, CDCl<sub>3</sub>) δ 221.6, 145.5, 141.8, 138.5, 137.7, 136.6, 135.5, 131.9, 129.3, 129.3, 128.8, 128.3, 128.0, 127.8, 127.1, 127.0, 126.9, 92.5, 56.3, 44.5, 36.6, 29.4, 15.4; HRMS: (ESI) calcd for C<sub>29</sub>H<sub>26</sub>NaO<sub>2</sub><sup>+</sup> [M+Na]<sup>+</sup> 429.1825; found 429.1802. The enantiomeric purity was established by HPLC analysis using a chiral column: AD-H column, 30 °C, *n*-Hexane/*i*-Propanol = 85/15 as eluent, 254 nm, 1 mL/min. tR = 5.5 min (minor), 6.4 min (major).

Optical Rotation: [α]<sub>D</sub><sup>31</sup> 28.3 (c 0.9, *i*PrOH) for 90%ee.

Absolute stereochemistry was determined through analogy with X-ray crystal diffraction study of **9**.

<色谱图>

mAU

HPLC chromatogram

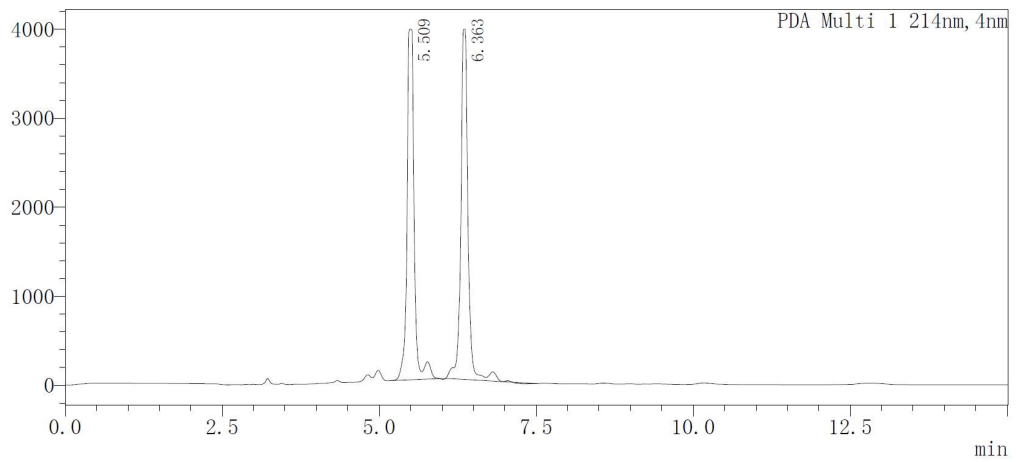

<峰表>

PDA Ch1 214nm

| 峰号 | 保留时间  | 面积       | 高度      | 浓度     | 浓度单位 | 标记 | 化合物名 |
|----|-------|----------|---------|--------|------|----|------|
| 1  | 5.509 | 31031743 | 3938223 | 49.792 |      | M  |      |
| 2  | 6.363 | 31290669 | 3934824 | 50.208 |      | M  |      |
| 总计 |       | 62322412 | 7873047 |        |      |    |      |

peak number

retention time

area

height

<色谱图>

mAU

HPLC chromatogram

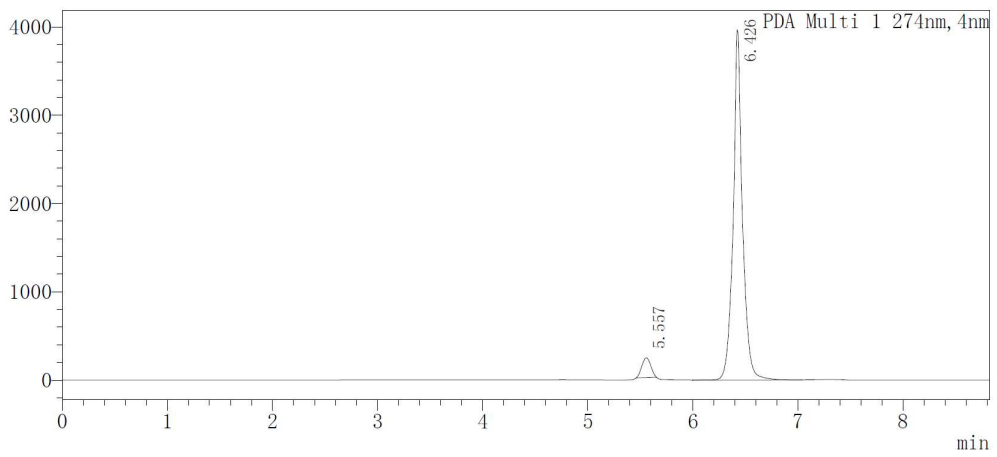

<峰表>

PDA Ch1 274nm

| 峰号 | 保留时间  | 面积       | 高度      | 浓度    | 浓度单位 | 标记 | 化合物名 |
|----|-------|----------|---------|-------|------|----|------|
| 1  | 5.557 | 1317971  | 225521  | 0.000 |      | M  |      |
| 2  | 6.426 | 24386819 | 3968240 | 0.000 |      | M  |      |
| 总计 |       | 25704791 | 4193761 |       |      |    |      |

peak number

retention time

area

height

(3*aR*,6*aR*)-5-((*E*)-1,2-bis(4-fluorophenyl)vinyl)-3*a*-hydroxy-6*a*-methyl-4-phenyl-3,3*a*,6,6*a*-tetrahydropentalen-1(2*H*)-one (**5ar**)

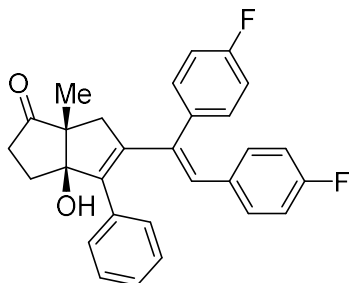

Chemical Formula: C<sub>29</sub>H<sub>24</sub>F<sub>2</sub>O<sub>2</sub>  
Exact Mass: 442.1744

**5ar** was prepared according to general procedure 2.2 using **1a** and **4r** and was purified by silica gel column chromatography (PE/EtOAc = 15/1~10/1) to obtain **5ar** as faint yellow solid (81% yield). <sup>1</sup>H NMR (400 MHz, CDCl<sub>3</sub>) δ 7.15-7.09 (m, 5H), 6.86-6.80 (m, 2H), 6.77-6.71 (m, 6H), 6.53 (s, 1H), 2.94 (d, *J* = 16.8 Hz, 1H), 2.61 (d, *J* = 16.8 Hz, 1H), 2.51-2.41 (m, 1H), 2.15-2.05 (m, 2H), 1.95-1.83 (m, 1H), 1.18 (s, 3H); <sup>13</sup>C NMR (101 MHz, CDCl<sub>3</sub>) δ 221.7, 161.9 (d, *J* = 246.7 Hz), 161.8 (d, *J* = 247.9 Hz), 144.9, 142.5, 136.8, 135.5, 134.3 (d, *J* = 3.5 Hz), 132.6 (d, *J* = 3.5 Hz), δ 131.3, 131.2 (d, *J* = 8.4 Hz), 131.1 (d, *J* = 7.8 Hz), 128.9, 128.0, 127.2, 115.4 (d, *J* = 21.3 Hz), 115.0 (d, *J* = 21.4 Hz), 92.6, 77.4, 77.1, 76.8, 56.3, 44.5, 36.7, 29.5, 15.4; <sup>19</sup>F NMR (376 MHz, CDCl<sub>3</sub>) δ -113.97, -114.61; HRMS: (ESI) calcd for C<sub>29</sub>H<sub>24</sub>F<sub>2</sub>O<sub>2</sub>Na<sup>+</sup>[M+Na]<sup>+</sup> 465.1637; found 465.1638.

The enantiomeric purity was established by HPLC analysis using a chiral column: AD-H column, 30 °C, *n*-Hexane/*i*-Propanol = 85/15 as eluent, 254 nm, 1 mL/min. tR = 5 min (minor), 6 min (major).

Optical Rotation: [α]<sub>D</sub><sup>30</sup> 82.4 (c 1.3, *i*PrOH) for 90%ee.

Absolute stereochemistry was determined through analogy with X-ray crystal diffraction study of **9**.

<色谱图>

mAU

HPLC chromatogram

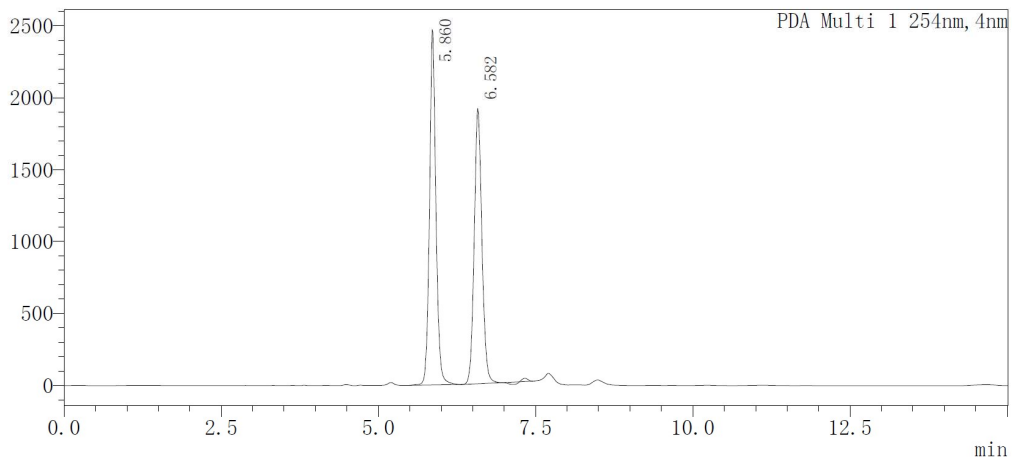

<峰表>

PDA Ch1 254nm

| 峰号 | 保留时间  | 面积       | 高度      | 浓度    | 浓度单位 | 标记 | 化合物名 |
|----|-------|----------|---------|-------|------|----|------|
| 1  | 5.860 | 17441630 | 2470999 | 0.000 |      | M  |      |
| 2  | 6.582 | 16249497 | 1915577 | 0.000 |      | M  |      |
| 总计 |       | 33691127 | 4386576 |       |      |    |      |

peak number

area

height

retention time

<色谱图>

mAU

HPLC chromatogram

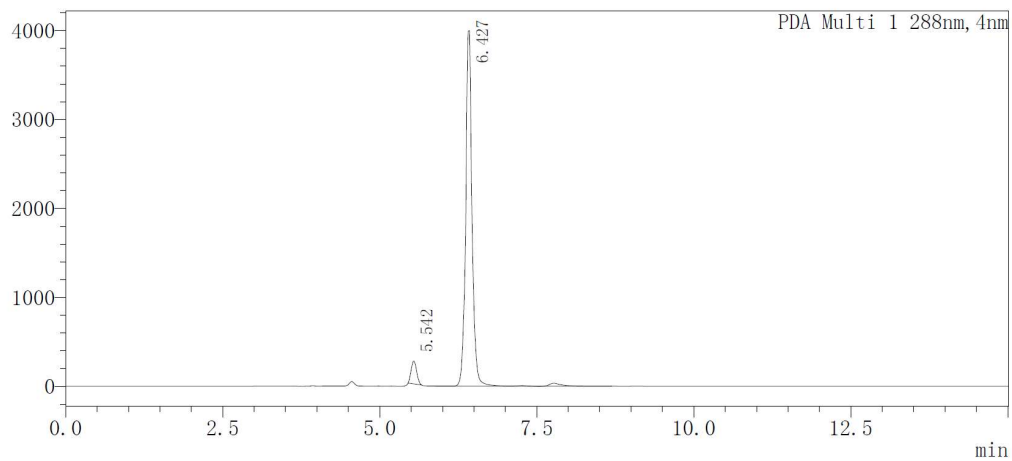

<峰表>

PDA Ch1 288nm

| 峰号 | 保留时间  | 面积       | 高度      | 浓度    | 浓度单位 | 标记 | 化合物名 |
|----|-------|----------|---------|-------|------|----|------|
| 1  | 5.542 | 1554448  | 256200  | 0.000 |      | M  |      |
| 2  | 6.427 | 28514210 | 3997864 | 0.000 |      | M  |      |
| 总计 |       | 30068658 | 4254064 |       |      |    |      |

peak number

area

height

retention time

(3*aR*,6*aR*)-5-((*E*)-1,2-bis(4-chlorophenyl)vinyl)-3*a*-hydroxy-6*a*-methyl-4-phenyl-3,3*a*,6,6*a*-tetrahydropentalen-1(2*H*)-one (**5as**)

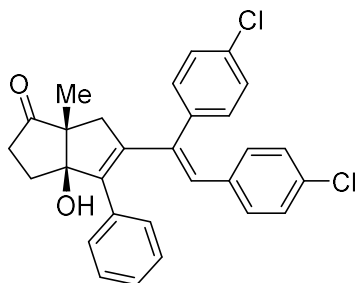

Chemical Formula: C<sub>29</sub>H<sub>24</sub>Cl<sub>2</sub>O<sub>2</sub>  
Exact Mass: 474.1153

**5as** was prepared according to general procedure 2.2 using **1a** and **4s** and was purified by silica gel column chromatography (PE/EtOAc = 20/1~10/1) to obtain **5as** as faint yellow oil (52% yield). <sup>1</sup>H NMR (400 MHz, CDCl<sub>3</sub>) δ 7.15-7.08 (m, 5H), 7.05-7.00 (m, 4H), 6.81-6.76 (m, 2H), 6.74-6.69 (m, 2H), 6.51 (s, 1H), 2.93 (d, *J* = 16.8 Hz, 1H), 2.60 (d, *J* = 16.8 Hz, 1H), 2.53-2.41 (m, 1H), 2.13-2.04 (m, 2H), 1.97-1.83 (m, 2H), 1.18 (s, 3H); <sup>13</sup>C NMR (101 MHz, CDCl<sub>3</sub>) δ 221.4, 144.5, 142.9, 137.4, 136.6, 135.2, 134.7, 133.1, 131.2, 130.7, 130.5, 128.8, 128.6, 128.2, 128.0, 127.1, 92.4, 56.2, 44.3, 36.6, 29.5, 15.3; HRMS: (ESI) calcd for C<sub>29</sub>H<sub>24</sub>Cl<sub>2</sub>O<sub>2</sub>Na<sup>+</sup> [M+Na]<sup>+</sup> 497.1046; found 497.1035.

The enantiomeric purity was established by HPLC analysis using a chiral column: AD-H column, 30 °C, *n*-Hexane/*i*-Propanol = 85/15 as eluent, 254 nm, 1 mL/min. *t*<sub>R</sub> = 6 min (minor), 9 min (major).

Optical Rotation: [α]<sub>D</sub><sup>27</sup> 57.1 (c 0.8, *i*PrOH) for 90%ee.

Absolute stereochemistry was determined through analogy with X-ray crystal diffraction study of **9**.

<色谱图> ← HPLC chromatogram

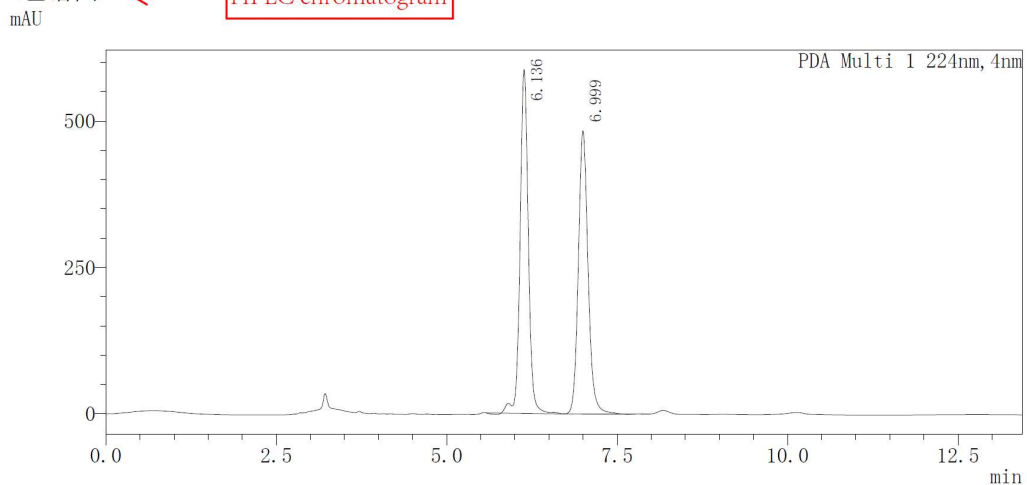

<峰表>

PDA Ch1 224nm

| 峰号 | 保留时间  | 面积      | 高度      | 浓度    | 浓度单位 | 标记 | 化合物名 |
|----|-------|---------|---------|-------|------|----|------|
| 1  | 6.136 | 4954459 | 588290  | 0.000 |      | M  |      |
| 2  | 6.999 | 4817388 | 484502  | 0.000 |      | M  |      |
| 总计 |       | 9771848 | 1072792 |       |      |    |      |

peak number

area

height

retention time

<色谱图> ← HPLC chromatogram

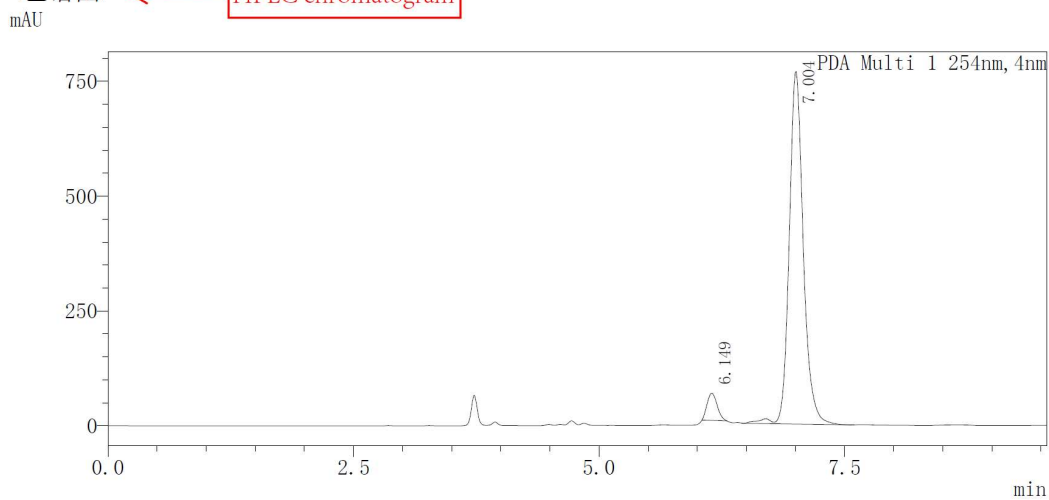

<峰表>

PDA Ch1 254nm

| 峰号 | 保留时间  | 面积      | 高度     | 浓度     | 浓度单位 | 标记 | 化合物名 |
|----|-------|---------|--------|--------|------|----|------|
| 1  | 6.149 | 422450  | 59331  | 5.212  |      | M  |      |
| 2  | 7.004 | 7682249 | 767675 | 94.788 |      | M  |      |
| 总计 |       | 8104699 | 827007 |        |      |    |      |

peak number

area

height

retention time



(3*aR*,6*aR*)-5-((*E*)-1,2-bis(3-fluorophenyl)vinyl)-3*a*-hydroxy-6*a*-methyl-4-phenyl-3,3*a*,6,6*a*-tetrahydropentalen-1(2*H*)-one (**5at**)

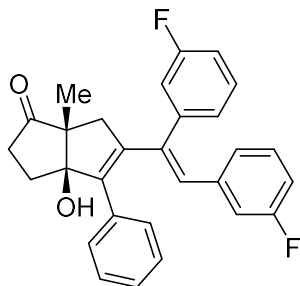

Chemical Formula: C<sub>29</sub>H<sub>24</sub>F<sub>2</sub>O<sub>2</sub>

Exact Mass: 442.1744

**5at** was prepared according to general procedure 2.2 using **1a** and **4t** and was purified by silica gel column chromatography (PE/EtOAc = 20/1~10/1) to obtain **5at** as yellow oil (46% yield). <sup>1</sup>H NMR (400 MHz, CDCl<sub>3</sub>) δ 7.19-7.10 (m, 5H), 7.08-6.97 (m, 2H), 6.81-6.71 (m, 2H), 6.69-6.64 (m, 1H), 6.61-6.51 (m, 3H), 6.46-6.38 (m, 1H), 2.94 (d, *J* = 16.8 Hz, 1H), 2.62 (d, *J* = 16.8 Hz, 1H), 2.51-2.33 (m, 1H), 2.18-2.04 (m, 2H), 2.00-1.86 (m, 2H), 1.19 (s, 3H); <sup>13</sup>C NMR (101 MHz, CDCl<sub>3</sub>) δ 221.3, 162.6 (d, *J* = 246.3 Hz), 162.3 (d, *J* = 245.2 Hz), 144.0, 143.1, 140.3 (d, *J* = 7.5 Hz), 138.3 (d, *J* = 7.8 Hz), 137.9, 135.2, 131.4, 130.0 (d, *J* = 8.3 Hz), 129.3 (d, *J* = 8.4 Hz), 128.8, 128.0, 127.2, 125.2 (d, *J* = 2.3 Hz), 125.1 (d, *J* = 2.8 Hz), 116.3 (d, *J* = 21.6 Hz), 115.7 (d, *J* = 22.2 Hz), 114.3 (d, *J* = 21.2 Hz), 114.1 (d, *J* = 21.3 Hz), 92.5, 56.1, 44.4, 36.6, 29.5, 15.4; <sup>19</sup>F NMR (376 MHz, CDCl<sub>3</sub>) δ -113.0 (m), -113.4 (m); HRMS: (ESI) calcd for C<sub>29</sub>H<sub>24</sub>F<sub>2</sub>O<sub>2</sub>Na<sup>+</sup>[M+Na]<sup>+</sup> 465.1621; found 465.1636.

The enantiomeric purity was established by HPLC analysis using a chiral column: AD-H column, 30 °C, *n*-Hexane/*i*-Propanol = 85/15 as eluent, 254 nm, 1 mL/min. tR = 5.5 min (minor), 6.3 min (major).

Optical Rotation: [α]<sub>D</sub><sup>28</sup> 162.6 (c 0.8, *i*PrOH) for 90%ee.

Absolute stereochemistry was determined through analogy with X-ray crystal diffraction study of **9**.

<色谱图>

mAU

← HPLC chromatogram

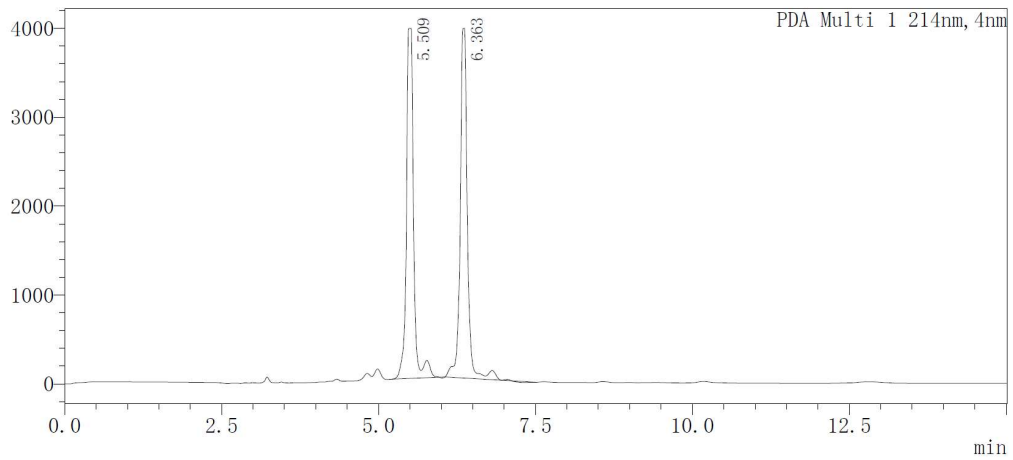

<峰表>

PDA Ch1 214nm

| 峰号 | 保留时间  | 面积       | 高度      | 浓度     | 浓度单位 | 标记 | 化合物名 |
|----|-------|----------|---------|--------|------|----|------|
| 1  | 5.509 | 31031743 | 3938223 | 49.792 |      | M  |      |
| 2  | 6.363 | 31290669 | 3934824 | 50.208 |      | M  |      |
| 总计 |       | 62322412 | 7873047 |        |      |    |      |

↑ peak number

↑ retention time

↑ area

↑ height

<色谱图>

mAU

← HPLC chromatogram

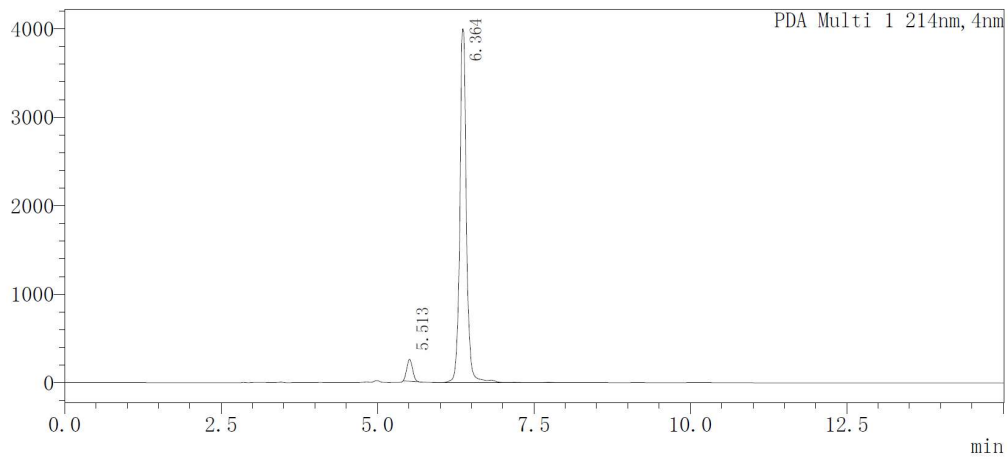

↑ peak number

↑ retention time

↑ area

↑ height

(3*aR*,6*aR*)-5-((*Z*)-1,2-di(thiophen-3-yl)vinyl)-3*a*-hydroxy-6*a*-methyl-4-phenyl-3,3*a*,6,6*a*-tetrahydropentalen-1(2*H*)-one (**5au**)

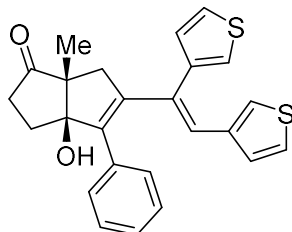

Chemical Formula: C<sub>25</sub>H<sub>22</sub>O<sub>2</sub>S<sub>2</sub>  
Exact Mass: 418.1061

**5au** was prepared according to general procedure 2.2 using **1a** and **4u** and was purified by silica gel column chromatography (PE/EtOAc = 15/1~10/1) to obtain **5au** as brown solid (71% yield). <sup>1</sup>H NMR (400 MHz, CDCl<sub>3</sub>) δ 7.16-7.09 (m, 5H), 7.05-7.02 (m, 1H), 7.01-6.98 (m, 1H), 6.76-6.73 (m, 1H), 6.72-6.69 (m, 1H), 6.59 (s, 1H), 6.58-6.56 (m, 1H), 6.39-6.36 (m, 1H), 3.01 (d, *J* = 16.7 Hz, 1H), 2.65 (d, *J* = 16.8 Hz, 1H), 2.48-2.38 (m, 1H), 2.12-2.04 (m, 2H), 2.02-1.82 (m, 2H), 1.19 (s, 3H); <sup>13</sup>C NMR (101 MHz, CDCl<sub>3</sub>) δ 221.7, 144.2, 141.6, 139.0, 138.1, 135.6, 131.5, 128.8, 128.5, 128.0, 127.8, 127.1, 126.8, 125.2, 124.8, 124.6, 123.6, 92.5, 56.0, 44.4, 36.6, 29.3, 15.4; HRMS: (ESI) calcd for C<sub>25</sub>H<sub>22</sub>O<sub>2</sub>S<sub>2</sub>Na<sup>+</sup> [M+Na]<sup>+</sup> 441.0953; found 441.0951.

The enantiomeric purity was established by HPLC analysis using a chiral column: AD-H column, 30 °C, *n*-Hexane/*i*-Propanol = 85/15 as eluent, 254 nm, 1 mL/min. t<sub>R</sub> = 6.7 min (minor), 8.3 min (major).

Optical Rotation: [α]<sub>D</sub><sup>30</sup> -30.6 (c 1.2, *i*PrOH) for 82%ee.

Absolute stereochemistry was determined through analogy with X-ray crystal diffraction study of **9**.

<色谱图> ← HPLC chromatogram

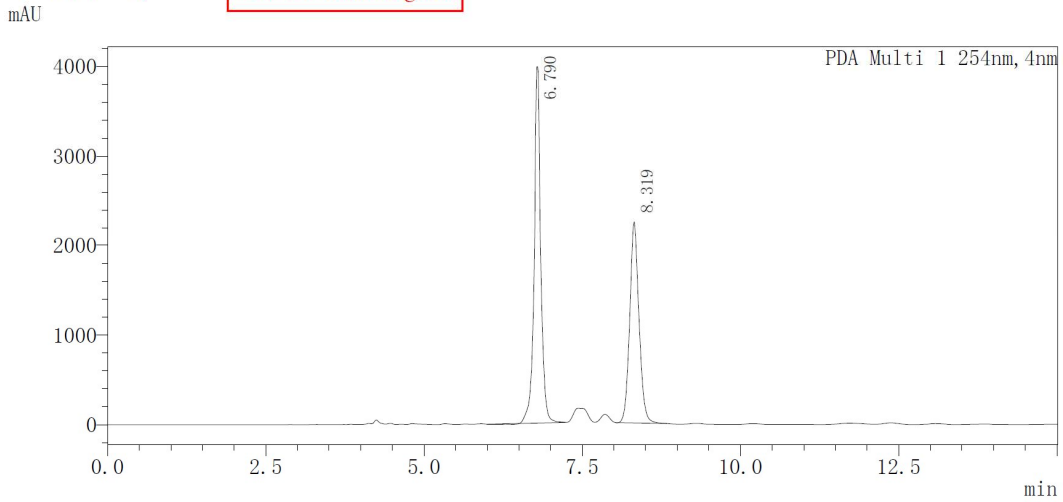

<峰表>

| 峰号 | 保留时间  | 面积       | 高度      | 浓度    | 浓度单位 | 标记 | 化合物名 |
|----|-------|----------|---------|-------|------|----|------|
| 1  | 6.790 | 28590361 | 3979237 | 0.000 |      | M  |      |
| 2  | 8.319 | 22756010 | 2249977 | 0.000 |      | M  |      |
| 总计 |       | 51346372 | 6229214 |       |      |    |      |

peak number  
retention time  
area  
height

<色谱图> ← HPLC chromatogram

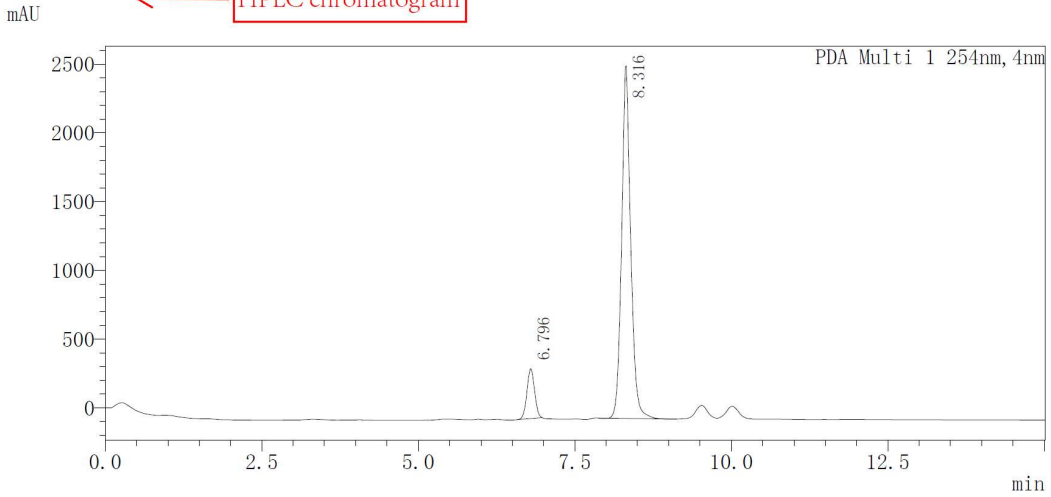

<峰表>

| 峰号 | 保留时间  | 面积       | 高度      | 浓度    | 浓度单位 | 标记 | 化合物名 |
|----|-------|----------|---------|-------|------|----|------|
| 1  | 6.796 | 3071854  | 362523  | 0.000 |      | M  |      |
| 2  | 8.316 | 25742301 | 2565196 | 0.000 |      | M  |      |
| 总计 |       | 28814155 | 2927719 |       |      |    |      |

peak number  
retention time  
area  
height

(3*aR*,6*aR*)-3*a*-hydroxy-5-((*E*)-2-(4-methoxyphenyl)-1-(4-(trifluoromethyl)phenyl)vinyl)-6*a*-methyl-4-phenyl-3,3*a*,6,6*a*-tetrahydropentalen-1(2*H*)-one (**5av**)

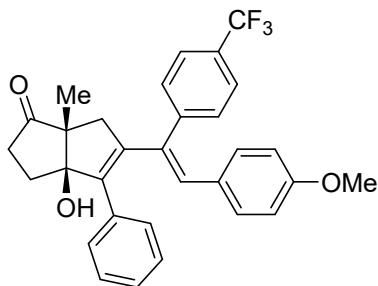

Chemical Formula: C<sub>31</sub>H<sub>27</sub>F<sub>3</sub>O<sub>3</sub>

Exact Mass: 504.1912

**5av** was prepared according to general procedure 2.2 using **1a** and **4v** and was purified by silica gel column chromatography (PE/EtOAc = 15/1~10/1) to obtain **5av** as yellow oil (60% yield). <sup>1</sup>H NMR (600 MHz, CDCl<sub>3</sub>) δ 7.30-7.28 (m, 2H), 7.26-7.23 (m, 2H), 7.20-7.17 (m, 2H), 7.16-7.13 (m, 1H), 6.93 - 6.89 (m, 2H), 6.84 - 6.80 (m, 2H), 6.67-6.65 (m, 2H), 6.45 (s, 1H), 3.76 (s, 3H), 2.87 (d, *J* = 17.0 Hz, 1H), 2.55 (d, *J* = 17.0 Hz, 1H), 2.50 - 2.39 (m, 1H), 2.20 - 2.08 (m, 2H), 1.97 - 1.86 (m, 2H), 1.17 (s, 3H); <sup>13</sup>C NMR (151 MHz, CDCl<sub>3</sub>) δ 221.4, 159.0, 145.5, 142.7, 140.5, 139.6, 135.3, 130.8, 130.4, 130.0, 129.7, 129.4, 128.7, 128.1, 127.2, 124.7 (q, *J* = 3.7 Hz), 114.0, 92.5, 56.4, 55.2, 44.3, 36.7, 29.4, 15.3; <sup>19</sup>F NMR (376 MHz, CDCl<sub>3</sub>) δ -62.50; HRMS: (ESI) calcd for C<sub>31</sub>H<sub>28</sub>O<sub>3</sub>F<sub>3</sub><sup>+</sup>[M+H]<sup>+</sup> 438.2052; found 438.2064.

The enantiomeric purity was established by HPLC analysis using a chiral column: AD-H column, 30 °C, *n*-Hexane/*i*-Propanol = 85/15 as eluent, 254 nm, 1 mL/min. tR = 5.9 min (minor), 6.7 min (major).

Optical Rotation: [α]<sub>D</sub><sup>28</sup> 149.5 (c 1.2, *i*PrOH) for 90%ee.

Absolute stereochemistry was determined through analogy with X-ray crystal diffraction study of **9**.

<色谱图>

mAU

← HPLC chromatogram

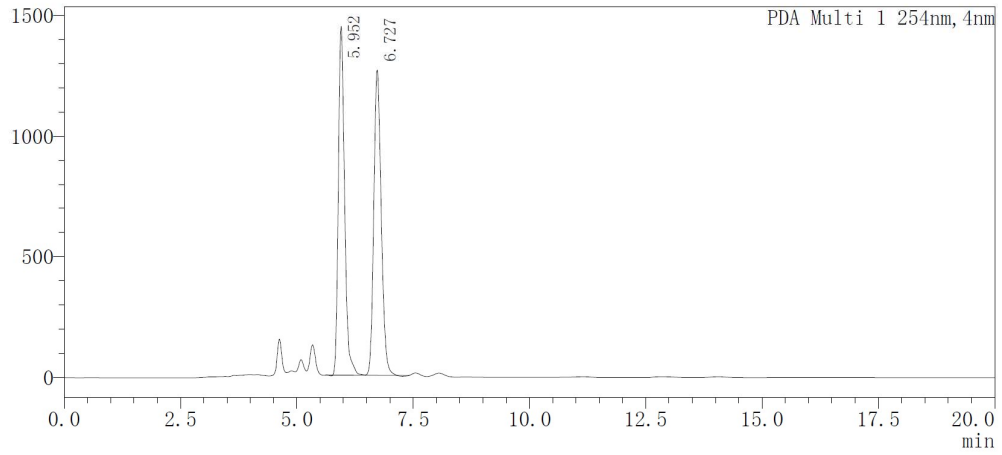

<峰表>

PDA Ch1 254nm

| 峰号 | 保留时间  | 面积       | 高度      | 浓度    | 浓度单位 | 标记  | 化合物名 |
|----|-------|----------|---------|-------|------|-----|------|
| 1  | 5.952 | 13460205 | 1444343 | 0.000 |      | M   |      |
| 2  | 6.727 | 14035702 | 1264552 | 0.000 |      | V M |      |
| 总计 |       | 27495907 | 2708895 |       |      |     |      |

↑ peak number

↑ retention time

↑ area

↑ height

<色谱图>

mAU

← HPLC chromatogram

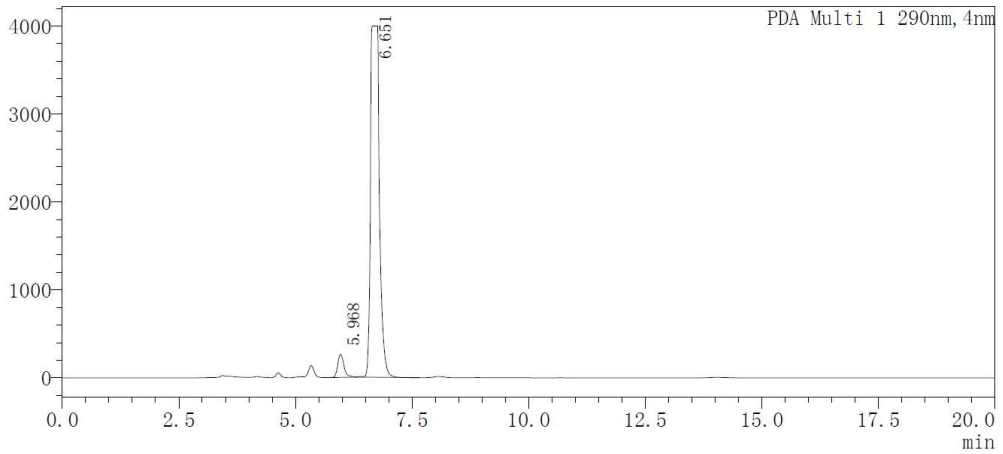

<峰表>

PDA Ch1 290nm

| 峰号 | 保留时间  | 面积       | 高度      | 浓度     | 浓度单位 | 标记 | 化合物名 |
|----|-------|----------|---------|--------|------|----|------|
| 1  | 5.968 | 2446083  | 261866  | 4.404  |      | M  |      |
| 2  | 6.651 | 53098759 | 3992673 | 95.596 |      | M  |      |
| 总计 |       | 55544842 | 4254539 |        |      |    |      |

↑ peak number

↑ retention time

↑ area

↑ height

4-((*E*)-1-((3*aR*,6*aR*)-3*a*-hydroxy-6*a*-methyl-6-oxo-3-phenyl-1,3*a*,4,5,6,6*a*-hexahydropentalen-2-yl)-2-(4-methoxyphenyl)vinyl)benzonitrile (**5aw**)

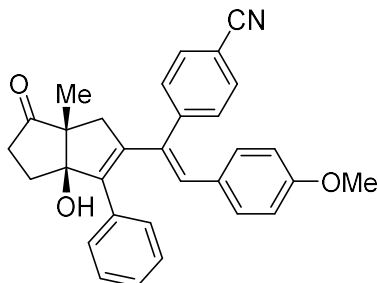

Chemical Formula: C<sub>31</sub>H<sub>27</sub>NO<sub>3</sub>  
Exact Mass: 461.1991

**5aw** was prepared according to general procedure 2.2 using **1a** and **4w** and was purified by silica gel column chromatography (PE/EtOAc = 15/1~10/1) to obtain **5aw** as yellow oil (50% yield). <sup>1</sup>H NMR (400 MHz, CDCl<sub>3</sub>) δ 7.33-7.28 (m, 2H), 7.23-7.12 (m, 5H), 6.90-6.86 (m, 2H), 6.83-6.75 (m, 2H), 6.68-6.63 (m, 2H), 6.41 (s, 1H), 3.75 (s, 3H), 2.87 (d, *J* = 17.0 Hz, 1H), 2.54 (d, *J* = 17.0 Hz, 1H), 2.51-2.42 (m, 1H), 2.19-2.05 (m, 2H), 2.02-1.97 (m, 1H), 1.97-1.87 (m, 1H), 1.16 (s, 3H); <sup>13</sup>C NMR (151 MHz, CDCl<sub>3</sub>) δ 221.3, 159.2, 145.2, 143.3, 141.7, 140.8, 135.2, 131.6, 130.3, 129.7, 129.7, 129.3, 128.7, 128.1, 127.2, 118.9, 114.1, 109.8, 92.5, 56.4, 55.2, 44.3, 36.7, 29.4, 15.3; HRMS: (ESI) calcd for C<sub>31</sub>H<sub>28</sub>NO<sub>3</sub><sup>+</sup> [M+H]<sup>+</sup> 462.2064; found 462.2054.

The enantiomeric purity was established by HPLC analysis using a chiral column: OD-H column, 30 °C, *n*-Hexane/*i*-Propanol = 80/20 as eluent, 254 nm, 1 mL/min. t<sub>R</sub> = 6 min (major), 12 min (minor).

Optical Rotation: [α]<sub>D</sub><sup>27</sup> 189.3 (c 0.4, *i*PrOH) for 92%ee.

Absolute stereochemistry was determined through analogy with X-ray crystal diffraction study of **9**.

<色谱图>

mAU

HPLC chromatogram

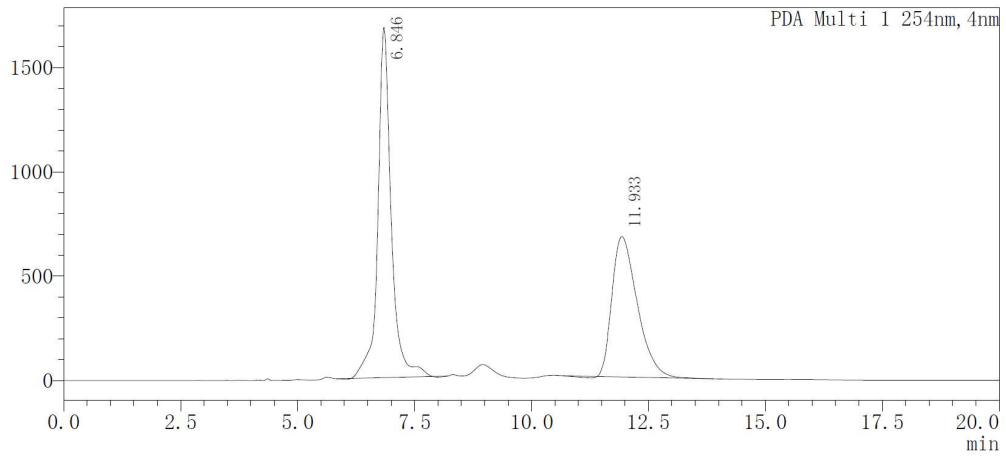

<峰表>

PDA Ch1 254nm

| 峰号 | 保留时间   | 面积       | 高度      | 浓度    | 浓度单位 | 标记 | 化合物名 |
|----|--------|----------|---------|-------|------|----|------|
| 1  | 6.846  | 33268582 | 1680158 | 0.000 |      | M  |      |
| 2  | 11.933 | 25248975 | 673424  | 0.000 |      | M  |      |
| 总计 |        | 58517557 | 2353582 |       |      |    |      |

peak number

area

height

retention time

<色谱图>

mAU

HPLC chromatogram

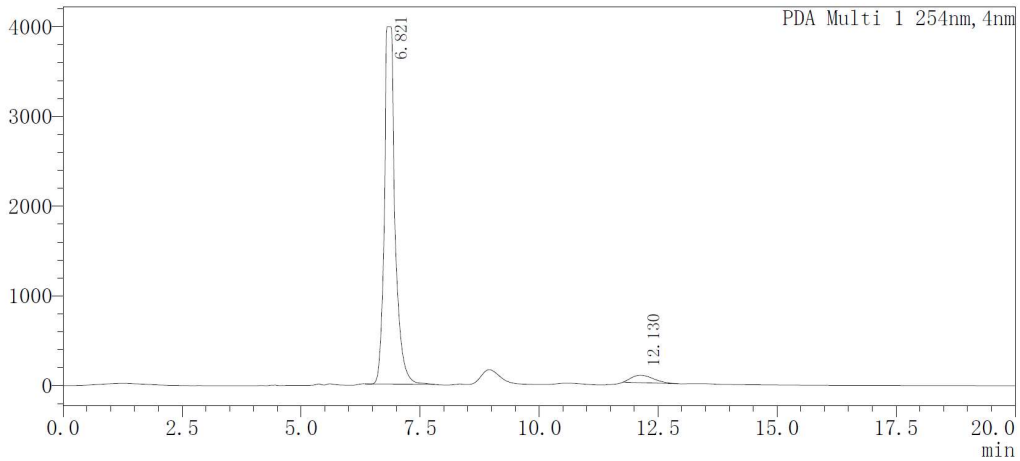

<峰表>

PDA Ch1 254nm

| 峰号 | 保留时间   | 面积       | 高度      | 浓度    | 浓度单位 | 标记 | 化合物名 |
|----|--------|----------|---------|-------|------|----|------|
| 1  | 6.821  | 62565039 | 3982805 | 0.000 |      | M  |      |
| 2  | 12.130 | 2657071  | 82494   | 0.000 |      | M  |      |
| 总计 |        | 65222110 | 4065299 |       |      |    |      |

peak number

area

height

retention time



## 8. Synthetic Applications

dimethyl (3*aS*, 3*bR*, 6*S*, 8*aS*)-3*a*-hydroxy-8*a*-methyl-6-((1-methyl-2,5-dioxocyclopentyl)methyl)-1-oxo-3*b*,7-diphenyl-1,2,3,3*a*,3*b*,6,8,8*a*-octahydrocyclopenta[*a*]indene-4,5-dicarboxylate (**6**)

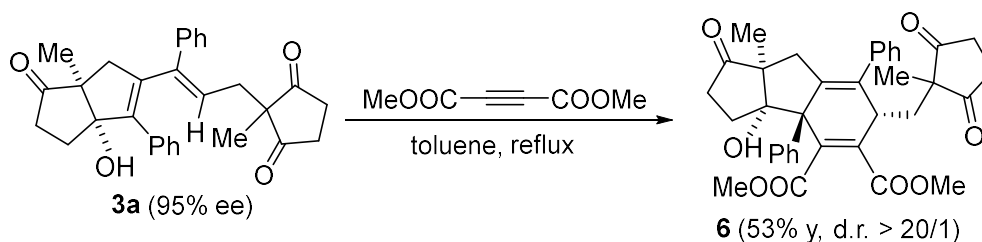

**Experimental procedure:** To a mixture of **3a** (0.05 mmol, 22.5 mg, 95% ee) and dry toluene (1.5 mL) in a sealed tube was added DMAD (0.15 mmol, 21.3 mg) under Argon. The reaction mixture was heated at 130 °C for 96 hours (monitored by TLC). The solvent was then removed under vacuum and the residue was purified by chromatography on silica gel, eluting with ethyl acetate/petroleum ether 1:4~1:1 (v/v) to afford the desired product **6** in 53% yield (> 20/1 d.r.). <sup>1</sup>H NMR (400 MHz, CDCl<sub>3</sub>-*d*) δ 7.21-7.10 (m, 8H), 6.96-6.91 (m, 2H), 5.51 (dd, *J* = 8.4, 6.6 Hz, 1H), 3.83 (s, 3H), 3.72 (s, 3H), 2.62-2.47 (m, 4H), 2.45-2.21 (m, 6H), 2.01-1.92 (m, 1H), 1.14 (s, 3H), 0.92 (s, 3H); <sup>13</sup>C NMR (101 MHz, CDCl<sub>3</sub>) δ 215.4, 215.3, 212.8, 165.8, 163.2, 154.0, 152.2, 149.7, 142.4, 140.9, 136.6, 134.4, 129.3, 128.1, 128.0, 127.6, 127.1, 124.6, 87.2, 57.2, 56.7, 52.3, 52.2, 40.2, 35.0, 34.9, 34.6, 20.1, 18.1, 14.6. HRMS: (ESI) calcd for C<sub>36</sub>H<sub>37</sub>O<sub>8</sub><sup>+</sup>[M+H]<sup>+</sup> 597.2483; found 597.2389.

(3*aS*, 4*R*, 9*aS*, 9*cR*)-9*a*-methyl-4-((1-methyl-2,5-dioxocyclopentyl)methyl)-5,6-diphenyl-4,7,8,9*a*,9*b*,9*c*-hexahydrocyclopenta[2,3]indeno[4,5-*c*]furan-1,3,9(3*aH*)-trione (**8**)

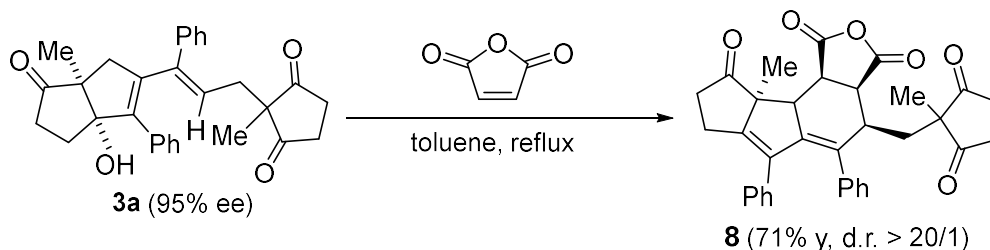

**Experimental procedure:** To a mixture of **3a** (0.05 mmol, 22.5 mg, 95% ee) and dry toluene (1.5 mL) in a sealed tube was added maleic anhydride (0.15 mmol, 14.7 mg) under Argon. The reaction mixture was heated at 130 °C for 96 hours (monitored by TLC). The solvent was then removed under vacuum and the residue was purified by chromatography on silica gel, eluting with ethyl acetate/petroleum ether 1:4~1:1 (v/v) to afford the desired product **8** in 71% yield (> 20/1 d.r.). <sup>1</sup>H NMR (400 MHz, CDCl<sub>3</sub>) δ 7.03-6.97 (m, 1H), 6.90-6.85 (m, 2H), 6.84-6.74 (m, 2H), 6.67-6.61 (m, 1H), 6.59-6.27 (m, 4H), 4.30 (dd, *J* = 9.1, 4.5 Hz, 1H), 3.58 (dd, *J* = 9.1, 6.3 Hz, 1H), 3.11-3.03 (m, 1H), 2.92-2.78 (m, 2H), 2.76-2.68 (m, 3H), 2.62-2.53 (m, 1H), 2.48-2.41 (m, 3H), 2.30 (dd, *J* = 15.3, 7.7 Hz, 1H), 1.81 (dd, *J* = 15.3, 4.5 Hz, 1H), 1.50 (s, 3H), 1.08 (s, 3H); <sup>13</sup>C NMR (101 MHz, CDCl<sub>3</sub>) δ 216.4, 215.3, 215.0, 172.5, 170.8, 160.8, 147.0, 136.7, 134.3, 133.6, 131.6, 130.8, 128.3, 128.2, 127.5, 127.2, 127.1, 126.9, 126.2, 59.0, 55.8, 47.6, 43.2, 42.0, 40.0, 36.8, 34.8, 34.6, 32.6, 25.6, 22.5, 15.7; HRMS: (ESI) calcd for C<sub>34</sub>H<sub>30</sub>O<sub>6</sub><sup>+</sup>[M+H]<sup>+</sup> 535.2103; found 535.2115.

4-((5*R*, 7*aR*, 10*aS*, 10*bR*)-10*a*-hydroxy-10*b*-(4-methoxyphenyl)-7*a*-methyl-5-((1-methyl-2,5-dioxocyclopentyl)methyl)-1,3,8-trioxo-2-phenyl-2,3,5,7,7*a*,8,9,10,10*a*,10*b*-decahydro-1*H*-pentaleno[1,2-*c*][1,2,4]triazolo[1,2-*a*]pyridazin-6-yl)benzonitrile (**9**)

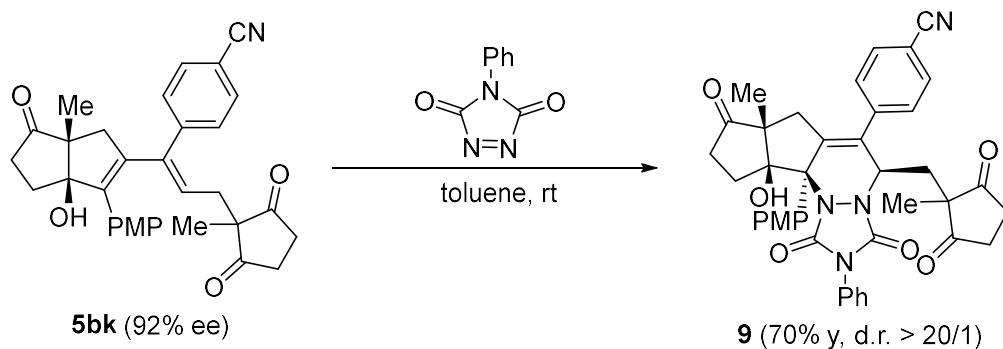

**Experimental procedure:** To a mixture of **5bk** (0.05 mmol, 25.0 mg, 92% ee) and dry toluene (2 mL) in a sealed tube was added 4-phenyl-3*H*-1,2,4-triazole-3,5(4*H*)-dione (0.15 mmol, 26.5 mg). The reaction mixture was stirred at room temperature for 72 hours until the reaction was complete (monitored by TLC). The solvent was then removed under vacuum and the residue was purified by chromatography on silica gel, eluting with ethyl acetate/petroleum ether 1:4~1:1 (v/v) to afford the desired product **9** in 70% yield (> 20/1 d.r.). <sup>1</sup>H NMR (400 MHz, CDCl<sub>3</sub>) δ 7.86-7.77 (m, 2H), 7.57-7.47 (m, 4H), 7.47-7.42 (m, 1H), 7.42-7.36 (m, 2H), 7.19 (d, *J* = 8.9 Hz, 2H), 6.75 (d, *J* = 9.0 Hz, 2H), 4.88 (d, *J* = 10.2 Hz, 1H), 3.91 (s, 1H), 3.77 (s, 3H), 3.18-3.07 (m, 1H), 2.73 (dd, *J* = 18.2, 2.9 Hz, 1H), 2.67-2.52 (m, 4H), 2.38-2.21 (m, 4H), 1.54 (d, *J* = 14.0 Hz, 1H), 1.21 (s, 3H), 1.09-1.01 (m, 1H), 0.96 (s, 3H); <sup>13</sup>C NMR (151 MHz, CDCl<sub>3</sub>) δ 218.1, 214.2, 213.7, 160.2, 152.4, 141.9, 140.8, 133.0, 130.9, 129.5, 129.4, 129.1, 128.7, 126.7, 114.3, 89.6, 76.3, 58.4, 56.4, 55.2, 52.0, 36.6, 35.9, 33.9, 33.9, 32.0, 30.9, 26.1, 18.7; HRMS: (ESI) calcd for C<sub>40</sub>H<sub>36</sub>N<sub>4</sub>O<sub>7</sub><sup>+</sup>[M+H]<sup>+</sup> 685.2639; found 685.2657.

---

## 9. Crystallographic data

### 7.1 Compound 3a

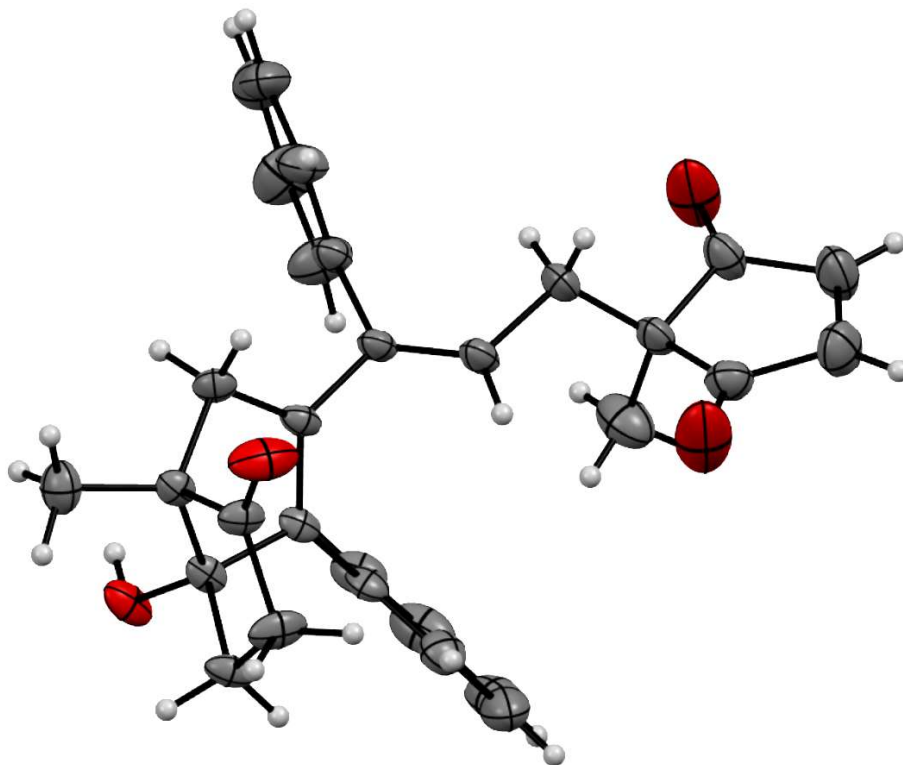

Table 1. Crystal data and structure refinement for **3a**.

|                                   |                                               |          |
|-----------------------------------|-----------------------------------------------|----------|
| Identification code               | cu_190113a_0m                                 |          |
| Empirical formula                 | C30 H30 O5                                    |          |
| Formula weight                    | 470.54                                        |          |
| Temperature                       | 273.15 K                                      |          |
| Wavelength                        | 1.54178 Å                                     |          |
| Crystal system                    | Orthorhombic                                  |          |
| Space group                       | P2 <sub>1</sub> 2 <sub>1</sub> 2 <sub>1</sub> |          |
| Unit cell dimensions              | a = 6.6633(2) Å                               | ∠ = 90°. |
|                                   | b = 19.2862(4) Å                              | ∠ = 90°. |
|                                   | c = 19.4190(4) Å                              | ∠ = 90°. |
| Volume                            | 2495.53(10) Å <sup>3</sup>                    |          |
| Z                                 | 4                                             |          |
| Density (calculated)              | 1.252 Mg/m <sup>3</sup>                       |          |
| Absorption coefficient            | 0.679 mm <sup>-1</sup>                        |          |
| F(000)                            | 1000                                          |          |
| Crystal size                      | 0.12 x 0.1 x 0.1 mm <sup>3</sup>              |          |
| Theta range for data collection   | 5.121 to 64.970°.                             |          |
| Index ranges                      | -7 ≤ h ≤ 7, -21 ≤ k ≤ 22, -22 ≤ l ≤ 19        |          |
| Reflections collected             | 9459                                          |          |
| Independent reflections           | 4089 [R(int) = 0.0962]                        |          |
| Completeness to theta = 64.970°   | 98.1 %                                        |          |
| Absorption correction             | None                                          |          |
| Max. and min. transmission        | 0.7530 and 0.3549                             |          |
| Refinement method                 | Full-matrix least-squares on F <sup>2</sup>   |          |
| Data / restraints / parameters    | 4089 / 0 / 319                                |          |
| Goodness-of-fit on F <sup>2</sup> | 1.061                                         |          |
| Final R indices [I > 2σ(I)]       | R1 = 0.0926, wR2 = 0.2421                     |          |
| R indices (all data)              | R1 = 0.0966, wR2 = 0.2483                     |          |
| Absolute structure parameter      | -0.1(2)                                       |          |
| Extinction coefficient            | n/a                                           |          |
| Largest diff. peak and hole       | 0.409 and -0.573 e.Å <sup>-3</sup>            |          |

Table 2. Atomic coordinates ( $\times 10^4$ ) and equivalent isotropic displacement parameters ( $\text{\AA}^2 \times 10^3$ ) for **3a**.  $U(\text{eq})$  is defined as one third of the trace of the orthogonalized  $U_{ij}$  tensor.

|       | x         | y        | z        | $U(\text{eq})$ |
|-------|-----------|----------|----------|----------------|
| C(1)  | -4707(8)  | -4742(2) | -4417(3) | 31(1)          |
| C(2)  | -4316(9)  | -5401(3) | -4838(3) | 38(1)          |
| C(3)  | -5662(12) | -5430(3) | -5455(3) | 52(2)          |
| C(4)  | -7228(11) | -4867(3) | -5357(3) | 49(2)          |
| C(5)  | -6678(9)  | -4487(3) | -4710(3) | 38(1)          |
| C(6)  | -3042(12) | -4219(4) | -4582(4) | 56(2)          |
| C(7)  | -4825(9)  | -4911(2) | -3650(3) | 35(1)          |
| C(8)  | -4830(8)  | -4285(2) | -3191(3) | 29(1)          |
| C(9)  | -3783(7)  | -4222(2) | -2612(3) | 26(1)          |
| C(10) | -2464(8)  | -4792(2) | -2351(3) | 27(1)          |
| C(11) | -3157(9)  | -5293(3) | -1899(3) | 39(1)          |
| C(12) | -1930(12) | -5830(3) | -1692(3) | 49(2)          |
| C(13) | -19(11)   | -5882(3) | -1929(4) | 55(2)          |
| C(14) | 717(11)   | -5390(4) | -2370(4) | 61(2)          |
| C(15) | -483(10)  | -4834(3) | -2568(4) | 50(2)          |
| C(16) | -3915(7)  | -3592(2) | -2169(3) | 23(1)          |
| C(17) | -4508(7)  | -3632(2) | -1423(2) | 26(1)          |
| C(18) | -4947(7)  | -2877(2) | -1240(2) | 24(1)          |
| C(19) | -3763(6)  | -2435(2) | -1765(2) | 23(1)          |
| C(20) | -3549(6)  | -2932(2) | -2373(3) | 22(1)          |
| C(21) | -7102(7)  | -2696(2) | -1428(3) | 28(1)          |
| C(22) | -7181(7)  | -2030(3) | -1845(3) | 38(1)          |
| C(23) | -5026(7)  | -1786(2) | -1893(3) | 28(1)          |
| C(24) | -4584(9)  | -2691(3) | -488(3)  | 39(1)          |
| C(25) | -2798(8)  | -2707(2) | -3056(3) | 28(1)          |
| C(26) | -4017(9)  | -2340(3) | -3509(3) | 39(1)          |
| C(27) | -3306(11) | -2123(3) | -4140(3) | 50(2)          |
| C(28) | -1371(13) | -2277(3) | -4338(4) | 54(2)          |
| C(29) | -165(11)  | -2648(3) | -3903(4) | 51(2)          |

---

|       |           |          |          |       |
|-------|-----------|----------|----------|-------|
| C(30) | -843(9)   | -2864(3) | -3268(3) | 38(1) |
| O(1)  | -3047(9)  | -5819(3) | -4708(3) | 72(2) |
| O(2)  | -7682(10) | -4027(3) | -4467(3) | 78(2) |
| O(3)  | -1842(5)  | -2201(2) | -1543(2) | 35(1) |
| O(4)  | -8553(6)  | -3040(2) | -1276(3) | 51(1) |
| O(5)  | -8754(9)  | -5918(3) | -4195(4) | 80(2) |

---

---

Table 3. Bond lengths [Å] and angles [°] for **3a**.

---

|             |           |
|-------------|-----------|
| C(1)-C(2)   | 1.534(6)  |
| C(1)-C(5)   | 1.513(8)  |
| C(1)-C(6)   | 1.533(9)  |
| C(1)-C(7)   | 1.527(7)  |
| C(2)-C(3)   | 1.498(8)  |
| C(2)-O(1)   | 1.194(7)  |
| C(3)-H(3)   | 0.9300    |
| C(3)-C(4)   | 1.519(9)  |
| C(4)-H(4)   | 0.9300    |
| C(4)-C(5)   | 1.501(8)  |
| C(5)-O(2)   | 1.207(8)  |
| C(6)-H(6A)  | 0.9600    |
| C(6)-H(6B)  | 0.9600    |
| C(6)-H(6C)  | 0.9600    |
| C(7)-H(7A)  | 0.9700    |
| C(7)-H(7B)  | 0.9700    |
| C(7)-C(8)   | 1.501(6)  |
| C(8)-H(8)   | 0.9300    |
| C(8)-C(9)   | 1.329(7)  |
| C(9)-C(10)  | 1.495(6)  |
| C(9)-C(16)  | 1.490(6)  |
| C(10)-C(11) | 1.385(7)  |
| C(10)-C(15) | 1.389(8)  |
| C(11)-H(11) | 0.9300    |
| C(11)-C(12) | 1.380(9)  |
| C(12)-H(12) | 0.9300    |
| C(12)-C(13) | 1.358(11) |
| C(13)-H(13) | 0.9300    |
| C(13)-C(14) | 1.368(11) |
| C(14)-H(14) | 0.9300    |
| C(14)-C(15) | 1.391(9)  |
| C(15)-H(15) | 0.9300    |
| C(16)-C(17) | 1.504(7)  |



---

|              |           |
|--------------|-----------|
| C(16)-C(20)  | 1.355(6)  |
| C(17)-H(17A) | 0.9700    |
| C(17)-H(17B) | 0.9700    |
| C(17)-C(18)  | 1.527(6)  |
| C(18)-C(19)  | 1.544(7)  |
| C(18)-C(21)  | 1.522(6)  |
| C(18)-C(24)  | 1.523(7)  |
| C(19)-C(20)  | 1.528(6)  |
| C(19)-C(23)  | 1.529(6)  |
| C(19)-O(3)   | 1.424(6)  |
| C(20)-C(25)  | 1.482(7)  |
| C(21)-C(22)  | 1.518(7)  |
| C(21)-O(4)   | 1.209(6)  |
| C(22)-H(22A) | 0.9700    |
| C(22)-H(22B) | 0.9700    |
| C(22)-C(23)  | 1.514(7)  |
| C(23)-H(23A) | 0.9700    |
| C(23)-H(23B) | 0.9700    |
| C(24)-H(24A) | 0.9600    |
| C(24)-H(24B) | 0.9600    |
| C(24)-H(24C) | 0.9600    |
| C(25)-C(26)  | 1.392(8)  |
| C(25)-C(30)  | 1.399(7)  |
| C(26)-H(26)  | 0.9300    |
| C(26)-C(27)  | 1.378(9)  |
| C(27)-H(27)  | 0.9300    |
| C(27)-C(28)  | 1.378(11) |
| C(28)-H(28)  | 0.9300    |
| C(28)-C(29)  | 1.370(11) |
| C(29)-H(29)  | 0.9300    |
| C(29)-C(30)  | 1.377(9)  |
| C(30)-H(30)  | 0.9300    |
| O(3)-H(3A)   | 0.8200    |
| O(5)-H(5A)   | 0.8498    |
| O(5)-H(5B)   | 0.8331    |

---

|                  |          |
|------------------|----------|
| C(5)-C(1)-C(2)   | 102.5(4) |
| C(5)-C(1)-C(6)   | 109.6(5) |
| C(5)-C(1)-C(7)   | 113.0(5) |
| C(6)-C(1)-C(2)   | 108.2(5) |
| C(7)-C(1)-C(2)   | 110.6(4) |
| C(7)-C(1)-C(6)   | 112.4(5) |
| C(3)-C(2)-C(1)   | 110.8(5) |
| O(1)-C(2)-C(1)   | 124.5(5) |
| O(1)-C(2)-C(3)   | 124.6(5) |
| C(2)-C(3)-H(3)   | 126.7    |
| C(2)-C(3)-C(4)   | 106.5(5) |
| C(4)-C(3)-H(3)   | 126.7    |
| C(3)-C(4)-H(4)   | 126.7    |
| C(5)-C(4)-C(3)   | 106.7(5) |
| C(5)-C(4)-H(4)   | 126.7    |
| C(4)-C(5)-C(1)   | 111.6(5) |
| O(2)-C(5)-C(1)   | 125.0(6) |
| O(2)-C(5)-C(4)   | 123.4(6) |
| C(1)-C(6)-H(6A)  | 109.5    |
| C(1)-C(6)-H(6B)  | 109.5    |
| C(1)-C(6)-H(6C)  | 109.5    |
| H(6A)-C(6)-H(6B) | 109.5    |
| H(6A)-C(6)-H(6C) | 109.5    |
| H(6B)-C(6)-H(6C) | 109.5    |
| C(1)-C(7)-H(7A)  | 108.7    |
| C(1)-C(7)-H(7B)  | 108.7    |
| H(7A)-C(7)-H(7B) | 107.6    |
| C(8)-C(7)-C(1)   | 114.1(4) |
| C(8)-C(7)-H(7A)  | 108.7    |
| C(8)-C(7)-H(7B)  | 108.7    |
| C(7)-C(8)-H(8)   | 117.4    |
| C(9)-C(8)-C(7)   | 125.1(4) |
| C(9)-C(8)-H(8)   | 117.4    |
| C(8)-C(9)-C(10)  | 121.9(4) |
| C(8)-C(9)-C(16)  | 122.1(4) |
| C(16)-C(9)-C(10) | 116.0(4) |

---

|                     |          |
|---------------------|----------|
| C(11)-C(10)-C(9)    | 122.1(5) |
| C(11)-C(10)-C(15)   | 117.9(5) |
| C(15)-C(10)-C(9)    | 120.0(5) |
| C(10)-C(11)-H(11)   | 119.6    |
| C(12)-C(11)-C(10)   | 120.8(6) |
| C(12)-C(11)-H(11)   | 119.6    |
| C(11)-C(12)-H(12)   | 119.6    |
| C(13)-C(12)-C(11)   | 120.8(6) |
| C(13)-C(12)-H(12)   | 119.6    |
| C(12)-C(13)-H(13)   | 120.1    |
| C(12)-C(13)-C(14)   | 119.8(6) |
| C(14)-C(13)-H(13)   | 120.1    |
| C(13)-C(14)-H(14)   | 120.0    |
| C(13)-C(14)-C(15)   | 120.1(7) |
| C(15)-C(14)-H(14)   | 120.0    |
| C(10)-C(15)-C(14)   | 120.6(6) |
| C(10)-C(15)-H(15)   | 119.7    |
| C(14)-C(15)-H(15)   | 119.7    |
| C(9)-C(16)-C(17)    | 122.0(4) |
| C(20)-C(16)-C(9)    | 125.9(4) |
| C(20)-C(16)-C(17)   | 112.1(4) |
| C(16)-C(17)-H(17A)  | 111.2    |
| C(16)-C(17)-H(17B)  | 111.2    |
| C(16)-C(17)-C(18)   | 103.1(4) |
| H(17A)-C(17)-H(17B) | 109.1    |
| C(18)-C(17)-H(17A)  | 111.2    |
| C(18)-C(17)-H(17B)  | 111.2    |
| C(17)-C(18)-C(19)   | 105.9(4) |
| C(21)-C(18)-C(17)   | 110.1(4) |
| C(21)-C(18)-C(19)   | 101.4(4) |
| C(21)-C(18)-C(24)   | 109.0(4) |
| C(24)-C(18)-C(17)   | 114.6(4) |
| C(24)-C(18)-C(19)   | 114.9(4) |
| C(20)-C(19)-C(18)   | 102.2(3) |
| C(20)-C(19)-C(23)   | 116.1(4) |
| C(23)-C(19)-C(18)   | 106.1(4) |

---

|                     |          |
|---------------------|----------|
| O(3)-C(19)-C(18)    | 115.7(4) |
| O(3)-C(19)-C(20)    | 110.5(4) |
| O(3)-C(19)-C(23)    | 106.5(4) |
| C(16)-C(20)-C(19)   | 110.3(4) |
| C(16)-C(20)-C(25)   | 126.6(4) |
| C(25)-C(20)-C(19)   | 122.6(4) |
| C(22)-C(21)-C(18)   | 110.7(4) |
| O(4)-C(21)-C(18)    | 124.7(4) |
| O(4)-C(21)-C(22)    | 124.5(4) |
| C(21)-C(22)-H(22A)  | 110.7    |
| C(21)-C(22)-H(22B)  | 110.7    |
| H(22A)-C(22)-H(22B) | 108.8    |
| C(23)-C(22)-C(21)   | 105.2(4) |
| C(23)-C(22)-H(22A)  | 110.7    |
| C(23)-C(22)-H(22B)  | 110.7    |
| C(19)-C(23)-H(23A)  | 110.8    |
| C(19)-C(23)-H(23B)  | 110.8    |
| C(22)-C(23)-C(19)   | 104.9(4) |
| C(22)-C(23)-H(23A)  | 110.8    |
| C(22)-C(23)-H(23B)  | 110.8    |
| H(23A)-C(23)-H(23B) | 108.8    |
| C(18)-C(24)-H(24A)  | 109.5    |
| C(18)-C(24)-H(24B)  | 109.5    |
| C(18)-C(24)-H(24C)  | 109.5    |
| H(24A)-C(24)-H(24B) | 109.5    |
| H(24A)-C(24)-H(24C) | 109.5    |
| H(24B)-C(24)-H(24C) | 109.5    |
| C(26)-C(25)-C(20)   | 121.2(5) |
| C(26)-C(25)-C(30)   | 117.9(5) |
| C(30)-C(25)-C(20)   | 121.0(5) |
| C(25)-C(26)-H(26)   | 119.5    |
| C(27)-C(26)-C(25)   | 121.0(6) |
| C(27)-C(26)-H(26)   | 119.5    |
| C(26)-C(27)-H(27)   | 119.8    |
| C(28)-C(27)-C(26)   | 120.4(7) |
| C(28)-C(27)-H(27)   | 119.8    |

---

|                   |          |
|-------------------|----------|
| C(27)-C(28)-H(28) | 120.4    |
| C(29)-C(28)-C(27) | 119.3(6) |
| C(29)-C(28)-H(28) | 120.4    |
| C(28)-C(29)-H(29) | 119.4    |
| C(28)-C(29)-C(30) | 121.2(6) |
| C(30)-C(29)-H(29) | 119.4    |
| C(25)-C(30)-H(30) | 119.9    |
| C(29)-C(30)-C(25) | 120.2(6) |
| C(29)-C(30)-H(30) | 119.9    |
| C(19)-O(3)-H(3A)  | 109.5    |
| H(5A)-O(5)-H(5B)  | 117.3    |

---

Symmetry transformations used to generate equivalent atoms:

Table 4. Anisotropic displacement parameters ( $\text{\AA}^2 \times 10^3$ ) for **3a**. The anisotropic displacement factor exponent takes the form:  $-2 \sin^2[\theta] [h^2 a^{*2} U^{11} + \dots + 2 h k a^* b^* U^{12}]$

|       | U <sup>11</sup> | U <sup>22</sup> | U <sup>33</sup> | U <sup>23</sup> | U <sup>13</sup> | U <sup>12</sup> |
|-------|-----------------|-----------------|-----------------|-----------------|-----------------|-----------------|
| C(1)  | 37(3)           | 22(2)           | 35(2)           | -9(2)           | -5(2)           | 3(2)            |
| C(2)  | 39(3)           | 32(3)           | 43(3)           | -14(2)          | -4(3)           | 4(2)            |
| C(3)  | 61(4)           | 46(3)           | 49(3)           | -17(3)          | -17(3)          | 10(3)           |
| C(4)  | 43(4)           | 53(3)           | 51(3)           | -4(3)           | -17(3)          | 6(3)            |
| C(5)  | 40(3)           | 29(3)           | 44(3)           | 1(2)            | -2(3)           | 5(2)            |
| C(6)  | 58(5)           | 49(4)           | 62(4)           | -9(3)           | 11(3)           | -16(3)          |
| C(7)  | 48(3)           | 23(2)           | 33(2)           | -6(2)           | -9(2)           | -1(2)           |
| C(8)  | 31(3)           | 19(2)           | 38(2)           | -4(2)           | -7(2)           | 2(2)            |
| C(9)  | 27(3)           | 16(2)           | 34(2)           | -2(2)           | -3(2)           | 2(2)            |
| C(10) | 28(3)           | 18(2)           | 34(2)           | -2(2)           | -3(2)           | 2(2)            |
| C(11) | 37(3)           | 27(2)           | 54(3)           | 5(2)            | -2(3)           | -4(2)           |
| C(12) | 66(4)           | 27(3)           | 55(3)           | 10(2)           | -17(3)          | -3(3)           |
| C(13) | 67(5)           | 39(3)           | 60(4)           | -9(3)           | -22(4)          | 26(3)           |
| C(14) | 45(4)           | 71(4)           | 67(4)           | 7(4)            | 4(4)            | 30(4)           |
| C(15) | 37(4)           | 49(3)           | 62(4)           | 14(3)           | 11(3)           | 17(3)           |
| C(16) | 18(2)           | 16(2)           | 36(2)           | -1(2)           | -2(2)           | 1(2)            |
| C(17) | 26(2)           | 21(2)           | 33(2)           | 1(2)            | 2(2)            | 7(2)            |
| C(18) | 17(2)           | 22(2)           | 33(2)           | -3(2)           | -2(2)           | 4(2)            |
| C(19) | 10(2)           | 22(2)           | 37(2)           | -5(2)           | -1(2)           | 3(2)            |
| C(20) | 11(2)           | 20(2)           | 34(2)           | -2(2)           | 2(2)            | -2(2)           |
| C(21) | 17(2)           | 24(2)           | 42(3)           | 5(2)            | 0(2)            | 4(2)            |
| C(22) | 16(3)           | 34(3)           | 63(4)           | 18(3)           | -1(2)           | 6(2)            |
| C(23) | 19(2)           | 18(2)           | 48(3)           | 0(2)            | 5(2)            | 1(2)            |
| C(24) | 36(3)           | 48(3)           | 33(3)           | -8(2)           | -1(2)           | 4(2)            |
| C(25) | 27(3)           | 22(2)           | 36(2)           | -2(2)           | 4(2)            | -8(2)           |
| C(26) | 35(3)           | 35(3)           | 46(3)           | 0(2)            | -3(2)           | -7(2)           |
| C(27) | 68(5)           | 39(3)           | 42(3)           | 5(3)            | -3(3)           | -10(3)          |
| C(28) | 78(5)           | 38(3)           | 46(3)           | -1(3)           | 22(3)           | -18(3)          |
| C(29) | 48(4)           | 42(3)           | 64(4)           | -12(3)          | 30(3)           | -10(3)          |
| C(30) | 31(3)           | 32(2)           | 52(3)           | -3(2)           | 14(2)           | -3(2)           |

---

|      |       |       |        |        |        |        |
|------|-------|-------|--------|--------|--------|--------|
| O(1) | 70(4) | 62(3) | 83(3)  | -33(3) | -33(3) | 43(3)  |
| O(2) | 81(4) | 77(4) | 77(4)  | -27(3) | -28(3) | 50(3)  |
| O(3) | 15(2) | 30(2) | 61(2)  | -11(2) | -7(2)  | -2(1)  |
| O(4) | 20(2) | 44(2) | 90(3)  | 26(2)  | 3(2)   | -4(2)  |
| O(5) | 73(4) | 63(3) | 103(4) | 22(3)  | -29(4) | -11(3) |

---

Table 5. Hydrogen coordinates ( $\times 10^4$ ) and isotropic displacement parameters ( $\text{\AA}^2 \times 10^3$ ) for **3a**.

|        | x     | y     | z     | U(eq) |
|--------|-------|-------|-------|-------|
| H(3)   | -5560 | -5734 | -5826 | 62    |
| H(4)   | -8316 | -4775 | -5643 | 59    |
| H(6A)  | -1789 | -4386 | -4403 | 85    |
| H(6B)  | -3357 | -3781 | -4374 | 85    |
| H(6C)  | -2938 | -4163 | -5072 | 85    |
| H(7A)  | -6037 | -5176 | -3565 | 42    |
| H(7B)  | -3691 | -5201 | -3528 | 42    |
| H(8)   | -5628 | -3912 | -3322 | 35    |
| H(11)  | -4464 | -5267 | -1733 | 47    |
| H(12)  | -2417 | -6161 | -1386 | 59    |
| H(13)  | 787   | -6251 | -1793 | 66    |
| H(14)  | 2021  | -5428 | -2537 | 73    |
| H(15)  | 47    | -4489 | -2848 | 59    |
| H(17A) | -3423 | -3815 | -1144 | 32    |
| H(17B) | -5689 | -3919 | -1362 | 32    |
| H(22A) | -7727 | -2116 | -2300 | 45    |
| H(22B) | -8007 | -1686 | -1616 | 45    |
| H(23A) | -4750 | -1435 | -1547 | 34    |
| H(23B) | -4749 | -1594 | -2344 | 34    |
| H(24A) | -4855 | -2207 | -419  | 58    |
| H(24B) | -3212 | -2787 | -371  | 58    |
| H(24C) | -5456 | -2962 | -201  | 58    |
| H(26)  | -5333 | -2239 | -3384 | 47    |
| H(27)  | -4137 | -1873 | -4433 | 60    |
| H(28)  | -890  | -2129 | -4763 | 65    |
| H(29)  | 1137  | -2757 | -4038 | 62    |
| H(30)  | 1     | -3116 | -2979 | 46    |
| H(3A)  | -1105 | -2536 | -1481 | 53    |
| H(5A)  | -8586 | -6249 | -3913 | 120   |
| H(5B)  | -9869 | -5887 | -4387 | 120   |



---

Table 6. Torsion angles [°] for **3a**.

---

|                         |           |
|-------------------------|-----------|
| C(1)-C(2)-C(3)-C(4)     | -11.5(8)  |
| C(1)-C(7)-C(8)-C(9)     | -136.8(6) |
| C(2)-C(1)-C(5)-C(4)     | -11.5(6)  |
| C(2)-C(1)-C(5)-O(2)     | 169.8(7)  |
| C(2)-C(1)-C(7)-C(8)     | 169.5(5)  |
| C(2)-C(3)-C(4)-C(5)     | 3.9(7)    |
| C(3)-C(4)-C(5)-C(1)     | 5.1(7)    |
| C(3)-C(4)-C(5)-O(2)     | -176.2(7) |
| C(5)-C(1)-C(2)-C(3)     | 14.1(6)   |
| C(5)-C(1)-C(2)-O(1)     | -169.1(7) |
| C(5)-C(1)-C(7)-C(8)     | -76.3(6)  |
| C(6)-C(1)-C(2)-C(3)     | -101.7(6) |
| C(6)-C(1)-C(2)-O(1)     | 75.1(8)   |
| C(6)-C(1)-C(5)-C(4)     | 103.2(6)  |
| C(6)-C(1)-C(5)-O(2)     | -75.5(8)  |
| C(6)-C(1)-C(7)-C(8)     | 48.5(7)   |
| C(7)-C(1)-C(2)-C(3)     | 134.8(6)  |
| C(7)-C(1)-C(2)-O(1)     | -48.4(9)  |
| C(7)-C(1)-C(5)-C(4)     | -130.6(5) |
| C(7)-C(1)-C(5)-O(2)     | 50.7(8)   |
| C(7)-C(8)-C(9)-C(10)    | -0.4(8)   |
| C(7)-C(8)-C(9)-C(16)    | -178.0(5) |
| C(8)-C(9)-C(10)-C(11)   | -91.4(7)  |
| C(8)-C(9)-C(10)-C(15)   | 87.9(7)   |
| C(8)-C(9)-C(16)-C(17)   | 123.0(5)  |
| C(8)-C(9)-C(16)-C(20)   | -56.5(7)  |
| C(9)-C(10)-C(11)-C(12)  | 177.0(5)  |
| C(9)-C(10)-C(15)-C(14)  | -175.2(6) |
| C(9)-C(16)-C(17)-C(18)  | -166.3(4) |
| C(9)-C(16)-C(20)-C(19)  | -177.8(4) |
| C(9)-C(16)-C(20)-C(25)  | -5.0(8)   |
| C(10)-C(9)-C(16)-C(17)  | -54.6(6)  |
| C(10)-C(9)-C(16)-C(20)  | 125.8(5)  |
| C(10)-C(11)-C(12)-C(13) | -0.4(9)   |

---

|                         |           |
|-------------------------|-----------|
| C(11)-C(10)-C(15)-C(14) | 4.1(10)   |
| C(11)-C(12)-C(13)-C(14) | 1.2(10)   |
| C(12)-C(13)-C(14)-C(15) | 0.7(11)   |
| C(13)-C(14)-C(15)-C(10) | -3.4(11)  |
| C(15)-C(10)-C(11)-C(12) | -2.2(9)   |
| C(16)-C(9)-C(10)-C(11)  | 86.3(6)   |
| C(16)-C(9)-C(10)-C(15)  | -94.5(6)  |
| C(16)-C(17)-C(18)-C(19) | -23.4(5)  |
| C(16)-C(17)-C(18)-C(21) | 85.5(5)   |
| C(16)-C(17)-C(18)-C(24) | -151.2(4) |
| C(16)-C(20)-C(25)-C(26) | 111.3(6)  |
| C(16)-C(20)-C(25)-C(30) | -68.1(7)  |
| C(17)-C(16)-C(20)-C(19) | 2.6(5)    |
| C(17)-C(16)-C(20)-C(25) | 175.4(5)  |
| C(17)-C(18)-C(19)-C(20) | 24.7(5)   |
| C(17)-C(18)-C(19)-C(23) | 146.7(4)  |
| C(17)-C(18)-C(19)-O(3)  | -95.4(4)  |
| C(17)-C(18)-C(21)-C(22) | -130.2(5) |
| C(17)-C(18)-C(21)-O(4)  | 48.7(7)   |
| C(18)-C(19)-C(20)-C(16) | -17.2(5)  |
| C(18)-C(19)-C(20)-C(25) | 169.7(4)  |
| C(18)-C(19)-C(23)-C(22) | -34.2(5)  |
| C(18)-C(21)-C(22)-C(23) | -1.9(6)   |
| C(19)-C(18)-C(21)-C(22) | -18.4(5)  |
| C(19)-C(18)-C(21)-O(4)  | 160.6(6)  |
| C(19)-C(20)-C(25)-C(26) | -76.8(6)  |
| C(19)-C(20)-C(25)-C(30) | 103.8(5)  |
| C(20)-C(16)-C(17)-C(18) | 13.3(5)   |
| C(20)-C(19)-C(23)-C(22) | 78.5(5)   |
| C(20)-C(25)-C(26)-C(27) | 179.1(5)  |
| C(20)-C(25)-C(30)-C(29) | -179.7(5) |
| C(21)-C(18)-C(19)-C(20) | -90.3(4)  |
| C(21)-C(18)-C(19)-C(23) | 31.8(5)   |
| C(21)-C(18)-C(19)-O(3)  | 149.6(4)  |
| C(21)-C(22)-C(23)-C(19) | 21.8(6)   |
| C(23)-C(19)-C(20)-C(16) | -132.1(4) |

---

|                         |           |
|-------------------------|-----------|
| C(23)-C(19)-C(20)-C(25) | 54.8(6)   |
| C(24)-C(18)-C(19)-C(20) | 152.3(4)  |
| C(24)-C(18)-C(19)-C(23) | -85.6(5)  |
| C(24)-C(18)-C(19)-O(3)  | 32.3(5)   |
| C(24)-C(18)-C(21)-C(22) | 103.2(5)  |
| C(24)-C(18)-C(21)-O(4)  | -77.8(7)  |
| C(25)-C(26)-C(27)-C(28) | 0.9(9)    |
| C(26)-C(25)-C(30)-C(29) | 1.0(7)    |
| C(26)-C(27)-C(28)-C(29) | 0.2(9)    |
| C(27)-C(28)-C(29)-C(30) | -0.7(9)   |
| C(28)-C(29)-C(30)-C(25) | 0.1(9)    |
| C(30)-C(25)-C(26)-C(27) | -1.5(7)   |
| O(1)-C(2)-C(3)-C(4)     | 171.6(7)  |
| O(3)-C(19)-C(20)-C(16)  | 106.5(4)  |
| O(3)-C(19)-C(20)-C(25)  | -66.6(6)  |
| O(3)-C(19)-C(23)-C(22)  | -158.1(4) |
| O(4)-C(21)-C(22)-C(23)  | 179.2(6)  |

---

Symmetry transformations used to generate equivalent atoms:

Table 7. Hydrogen bonds for **3a** 0m [ $\text{\AA}$  and  $^\circ$ ].

---

| D-H...A | d(D-H) | d(H...A) | d(D...A) | $\angle$ (DHA) |
|---------|--------|----------|----------|----------------|
|---------|--------|----------|----------|----------------|

---

---

## 7.2 Compound 8

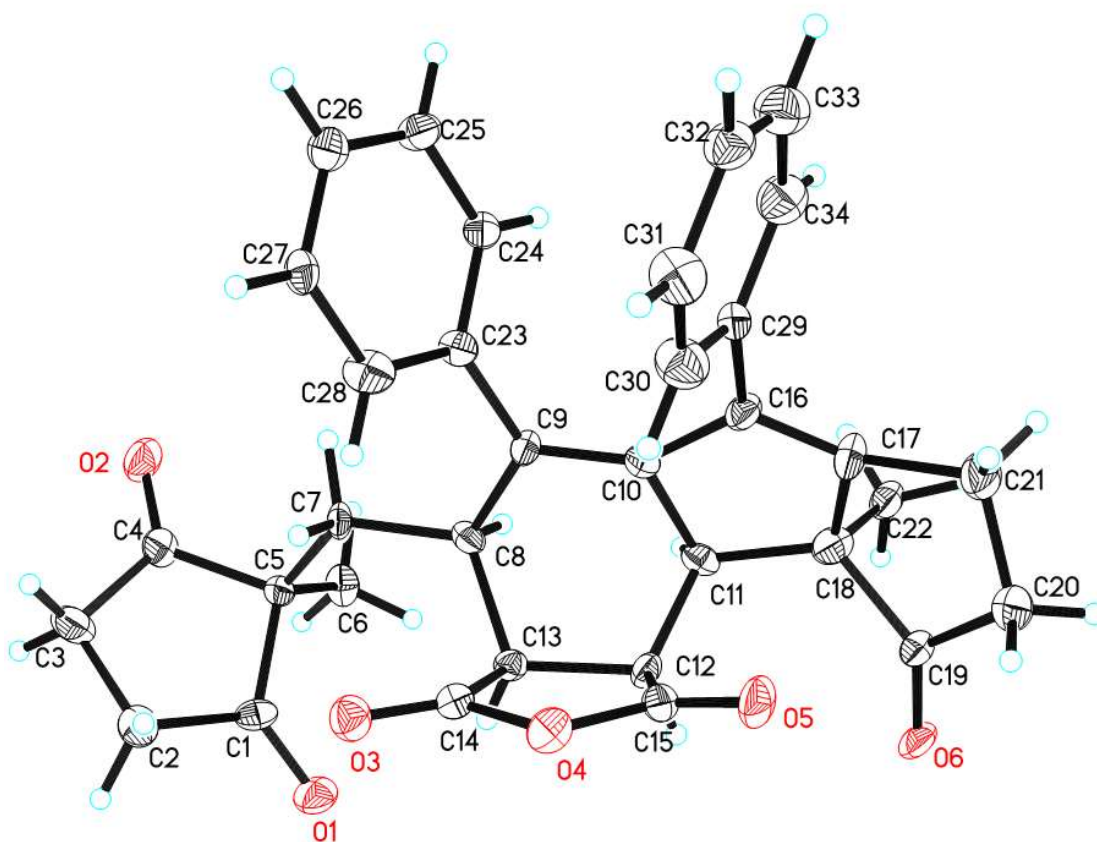

Table 8. Crystal data and structure refinement for **8**.

|                                   |                                             |                 |
|-----------------------------------|---------------------------------------------|-----------------|
| Identification code               | cu_190514b_0m                               |                 |
| Empirical formula                 | C34 H30 O6                                  |                 |
| Formula weight                    | 534.58                                      |                 |
| Temperature                       | 293(2) K                                    |                 |
| Wavelength                        | 1.54178 Å                                   |                 |
| Crystal system                    | Monoclinic                                  |                 |
| Space group                       | P 1 21 1                                    |                 |
| Unit cell dimensions              | a = 6.6786(13) Å                            | a = 90°.        |
|                                   | b = 19.494(4) Å                             | b = 92.008(9)°. |
|                                   | c = 21.437(4) Å                             | g = 90°.        |
| Volume                            | 2789.2(9) Å <sup>3</sup>                    |                 |
| Z                                 | 4                                           |                 |
| Density (calculated)              | 1.273 Mg/m <sup>3</sup>                     |                 |
| Absorption coefficient            | 0.703 mm <sup>-1</sup>                      |                 |
| F(000)                            | 1128                                        |                 |
| Crystal size                      | 0.06 x 0.04 x 0.02 mm <sup>3</sup>          |                 |
| Theta range for data collection   | 2.06 to 50.40°.                             |                 |
| Index ranges                      | -5 ≤ h ≤ 6, -19 ≤ k ≤ 18, -21 ≤ l ≤ 21      |                 |
| Reflections collected             | 7810                                        |                 |
| Independent reflections           | 4964 [R(int) = 0.2470]                      |                 |
| Completeness to theta = 50.40°    | 97.2 %                                      |                 |
| Absorption correction             | None                                        |                 |
| Max. and min. transmission        | 0.7500 and 0.4201                           |                 |
| Refinement method                 | Full-matrix least-squares on F <sup>2</sup> |                 |
| Data / restraints / parameters    | 4964 / 166 / 678                            |                 |
| Goodness-of-fit on F <sup>2</sup> | 0.944                                       |                 |
| Final R indices [I > 2σ(I)]       | R1 = 0.0967, wR2 = 0.2063                   |                 |
| R indices (all data)              | R1 = 0.2052, wR2 = 0.2695                   |                 |
| Absolute structure parameter      | 0.3(8)                                      |                 |
| Extinction coefficient            | 0.0075(8)                                   |                 |
| Largest diff. peak and hole       | 0.215 and -0.215 e.Å <sup>-3</sup>          |                 |

Table 9. Atomic coordinates ( $\times 10^4$ ) and equivalent isotropic displacement parameters ( $\text{\AA}^2 \times 10^3$ ) for **8**.  $U(\text{eq})$  is defined as one third of the trace of the orthogonalized  $U_{ij}$  tensor.

|       | x         | y        | z         | U(eq)  |
|-------|-----------|----------|-----------|--------|
| C(1)  | -4970(20) | 8358(9)  | 396(8)    | 78(5)  |
| C(2)  | -5890(30) | 7888(10) | 872(8)    | 103(6) |
| C(3)  | -4130(30) | 7521(10) | 1170(9)   | 115(7) |
| C(4)  | -2370(30) | 7644(9)  | 765(7)    | 81(6)  |
| C(5)  | -3040(20) | 8042(9)  | 184(6)    | 71(5)  |
| C(6)  | -1530(20) | 8614(9)  | 53(7)     | 86(6)  |
| C(7)  | -3300(20) | 7537(7)  | -371(6)   | 64(5)  |
| C(8)  | -3710(20) | 7814(8)  | -1022(6)  | 66(5)  |
| C(9)  | -3630(20) | 7278(8)  | -1526(7)  | 58(4)  |
| C(10) | -3870(20) | 7544(8)  | -2089(8)  | 64(4)  |
| C(11) | -4180(20) | 8320(8)  | -2178(7)  | 64(4)  |
| C(12) | -5960(20) | 8480(8)  | -1818(7)  | 67(5)  |
| C(13) | -5690(20) | 8251(8)  | -1131(6)  | 60(4)  |
| C(14) | -7410(30) | 7821(10) | -986(10)  | 83(6)  |
| C(15) | -7830(30) | 8093(9)  | -2005(10) | 74(5)  |
| C(16) | -4310(30) | 7248(9)  | -2723(8)  | 75(5)  |
| C(17) | -4530(30) | 7724(8)  | -3159(6)  | 83(6)  |
| C(18) | -4350(30) | 8431(8)  | -2879(9)  | 90(6)  |
| C(19) | -6020(20) | 8845(8)  | -3202(7)  | 74(5)  |
| C(20) | -6740(30) | 8453(8)  | -3782(7)  | 106(6) |
| C(21) | -5500(30) | 7811(9)  | -3802(7)  | 104(6) |
| C(22) | -2480(30) | 8807(8)  | -3121(7)  | 88(6)  |
| C(23) | -3237(19) | 6538(4)  | -1403(5)  | 68(5)  |
| C(28) | -4596(16) | 6147(6)  | -1080(5)  | 98(6)  |
| C(27) | -4225(19) | 5454(6)  | -973(5)   | 78(5)  |
| C(26) | -2500(20) | 5153(5)  | -1190(5)  | 93(6)  |
| C(25) | -1136(16) | 5545(6)  | -1514(5)  | 92(6)  |
| C(24) | -1507(16) | 6238(6)  | -1620(5)  | 70(5)  |
| C(29) | -4610(20) | 6503(5)  | -2884(6)  | 75(5)  |
| C(30) | -6350(20) | 6179(8)  | -2701(6)  | 123(8) |
| C(31) | -6734(19) | 5505(8)  | -2880(6)  | 125(7) |

---

|        |           |         |           |        |
|--------|-----------|---------|-----------|--------|
| C(32)  | -5380(20) | 5155(5) | -3242(6)  | 105(6) |
| C(33)  | -3650(20) | 5480(7) | -3425(6)  | 130(8) |
| C(34)  | -3261(18) | 6154(8) | -3246(6)  | 122(7) |
| O(1)   | -5750(20) | 8888(6) | 228(5)    | 106(5) |
| O(2)   | -760(20)  | 7394(7) | 824(6)    | 114(5) |
| O(3)   | -7930(20) | 7560(6) | -519(6)   | 99(4)  |
| O(4)   | -8689(18) | 7776(6) | -1518(6)  | 92(4)  |
| O(5)   | -8540(20) | 8017(7) | -2530(5)  | 109(5) |
| O(6)   | -6610(20) | 9388(6) | -3056(5)  | 110(5) |
| C(1A)  | 130(30)   | 156(11) | -1119(9)  | 89(6)  |
| C(2A)  | 1210(30)  | 487(10) | -587(9)   | 112(7) |
| C(3A)  | -330(30)  | 886(10) | -219(9)   | 102(6) |
| C(4A)  | -2150(30) | 900(10) | -640(9)   | 80(6)  |
| C(5A)  | -1830(20) | 543(8)  | -1246(7)  | 67(5)  |
| C(6A)  | -3570(30) | 35(9)   | -1396(7)  | 87(6)  |
| C(7A)  | -1700(20) | 1136(8) | -1738(8)  | 73(5)  |
| C(8A)  | -1820(20) | 957(8)  | -2430(7)  | 62(4)  |
| C(9A)  | -2230(20) | 1537(9) | -2903(8)  | 65(5)  |
| C(10A) | -2460(20) | 1326(8) | -3479(8)  | 62(5)  |
| C(11A) | -2110(20) | 601(7)  | -3664(6)  | 51(4)  |
| C(12A) | -20(30)   | 430(8)  | -3341(8)  | 73(5)  |
| C(13A) | 50(30)    | 556(8)  | -2649(7)  | 67(5)  |
| C(14A) | 1960(30)  | 936(10) | -2498(10) | 75(5)  |
| C(15A) | 1550(30)  | 946(11) | -3550(10) | 86(6)  |
| C(16A) | -2350(30) | 576(9)  | -4381(7)  | 73(5)  |
| C(17A) | -2650(30) | 1293(9) | -4558(7)  | 78(5)  |
| C(18A) | -2680(20) | 1721(8) | -4071(8)  | 65(5)  |
| C(19A) | -2160(30) | 1349(9) | -5239(7)  | 93(6)  |
| C(20A) | -620(30)  | 785(9)  | -5318(8)  | 129(9) |
| C(21A) | -730(30)  | 304(11) | -4764(8)  | 99(6)  |
| C(22A) | -2420(20) | 2266(5) | -2677(5)  | 73(5)  |
| C(23A) | -755(16)  | 2609(7) | -2426(5)  | 93(6)  |
| C(24A) | -880(20)  | 3305(7) | -2288(5)  | 103(7) |
| C(25A) | -2660(30) | 3656(5) | -2401(5)  | 128(9) |
| C(26A) | -4328(19) | 3313(7) | -2652(5)  | 103(7) |
| C(27A) | -4206(16) | 2617(7) | -2790(5)  | 81(5)  |

---

|        |           |         |          |        |
|--------|-----------|---------|----------|--------|
| C(28A) | -2830(20) | 2482(5) | -4178(5) | 84(6)  |
| C(29A) | -1173(16) | 2905(9) | -4078(5) | 93(6)  |
| C(30A) | -1330(20) | 3605(8) | -4192(6) | 112(8) |
| C(31A) | -3150(30) | 3882(5) | -4406(6) | 123(8) |
| C(32A) | -4800(20) | 3459(7) | -4505(5) | 98(6)  |
| C(33A) | -4644(18) | 2759(7) | -4391(5) | 89(6)  |
| C(34A) | -4160(30) | 132(8)  | -4551(8) | 107(7) |
| O(1A)  | 620(20)   | -336(7) | -1406(6) | 106(5) |
| O(2A)  | -3690(20) | 1137(7) | -473(6)  | 103(5) |
| O(3A)  | 2790(20)  | 1064(7) | -2038(7) | 104(5) |
| O(4A)  | 2698(18)  | 1153(6) | -3064(6) | 85(4)  |
| O(5A)  | 1859(18)  | 1115(6) | -4074(6) | 89(4)  |
| O(6A)  | 250(20)   | -212(6) | -4710(5) | 114(5) |

---



---

Table 10. Bond lengths [ $\text{\AA}$ ] and angles [ $^\circ$ ] for **8**.

---

|             |           |
|-------------|-----------|
| C(1)-C(2)   | 1.515(10) |
| C(1)-C(5)   | 1.516(10) |
| C(1)-O(1)   | 1.206(16) |
| C(2)-H(2A)  | 0.9700    |
| C(2)-H(2B)  | 0.9700    |
| C(2)-C(3)   | 1.498(10) |
| C(3)-H(3A)  | 0.9700    |
| C(3)-H(3B)  | 0.9700    |
| C(3)-C(4)   | 1.506(10) |
| C(4)-C(5)   | 1.519(10) |
| C(4)-O(2)   | 1.181(18) |
| C(5)-C(6)   | 1.53(2)   |
| C(5)-C(7)   | 1.550(19) |
| C(6)-H(6A)  | 0.9600    |
| C(6)-H(6B)  | 0.9600    |
| C(6)-H(6C)  | 0.9600    |
| C(7)-H(7A)  | 0.9700    |
| C(7)-H(7B)  | 0.9700    |
| C(7)-C(8)   | 1.511(17) |
| C(8)-H(8)   | 0.9800    |
| C(8)-C(9)   | 1.507(18) |
| C(8)-C(13)  | 1.584(19) |
| C(9)-C(10)  | 1.317(18) |
| C(9)-C(23)  | 1.488(16) |
| C(10)-C(11) | 1.54(2)   |
| C(10)-C(16) | 1.50(2)   |
| C(11)-H(11) | 0.9800    |
| C(11)-C(12) | 1.474(19) |
| C(11)-C(18) | 1.52(2)   |
| C(12)-H(12) | 0.9800    |
| C(12)-C(13) | 1.542(17) |
| C(12)-C(15) | 1.50(2)   |
| C(13)-H(13) | 0.9800    |
| C(13)-C(14) | 1.47(2)   |

---

|              |           |
|--------------|-----------|
| C(14)-O(3)   | 1.185(18) |
| C(14)-O(4)   | 1.40(2)   |
| C(15)-O(4)   | 1.356(18) |
| C(15)-O(5)   | 1.215(19) |
| C(16)-C(17)  | 1.323(19) |
| C(16)-C(29)  | 1.504(18) |
| C(17)-C(18)  | 1.507(10) |
| C(17)-C(21)  | 1.511(10) |
| C(18)-C(19)  | 1.523(10) |
| C(18)-C(22)  | 1.55(2)   |
| C(19)-C(20)  | 1.524(10) |
| C(19)-O(6)   | 1.177(16) |
| C(20)-H(20A) | 0.9700    |
| C(20)-H(20B) | 0.9700    |
| C(20)-C(21)  | 1.506(10) |
| C(21)-H(21A) | 0.9700    |
| C(21)-H(21B) | 0.9700    |
| C(22)-H(22A) | 0.9600    |
| C(22)-H(22B) | 0.9600    |
| C(22)-H(22C) | 0.9600    |
| C(23)-C(28)  | 1.3900    |
| C(23)-C(24)  | 1.3900    |
| C(28)-H(28)  | 0.9300    |
| C(28)-C(27)  | 1.3900    |
| C(27)-H(27)  | 0.9300    |
| C(27)-C(26)  | 1.3900    |
| C(26)-H(26)  | 0.9300    |
| C(26)-C(25)  | 1.3900    |
| C(25)-H(25)  | 0.9300    |
| C(25)-C(24)  | 1.3900    |
| C(24)-H(24)  | 0.9300    |
| C(29)-C(30)  | 1.3900    |
| C(29)-C(34)  | 1.3900    |
| C(30)-H(30)  | 0.9300    |
| C(30)-C(31)  | 1.3900    |
| C(31)-H(31)  | 0.9300    |

---

|               |           |
|---------------|-----------|
| C(31)-C(32)   | 1.3900    |
| C(32)-H(32)   | 0.9300    |
| C(32)-C(33)   | 1.3900    |
| C(33)-H(33)   | 0.9300    |
| C(33)-C(34)   | 1.3900    |
| C(34)-H(34)   | 0.9300    |
| C(1A)-C(2A)   | 1.48(2)   |
| C(1A)-C(5A)   | 1.52(2)   |
| C(1A)-O(1A)   | 1.19(2)   |
| C(2A)-H(2AA)  | 0.9700    |
| C(2A)-H(2AB)  | 0.9700    |
| C(2A)-C(3A)   | 1.53(2)   |
| C(3A)-H(3AA)  | 0.9700    |
| C(3A)-H(3AB)  | 0.9700    |
| C(3A)-C(4A)   | 1.49(2)   |
| C(4A)-C(5A)   | 1.50(2)   |
| C(4A)-O(2A)   | 1.194(19) |
| C(5A)-C(6A)   | 1.56(2)   |
| C(5A)-C(7A)   | 1.57(2)   |
| C(6A)-H(6AA)  | 0.9600    |
| C(6A)-H(6AB)  | 0.9600    |
| C(6A)-H(6AC)  | 0.9600    |
| C(7A)-H(7AA)  | 0.9700    |
| C(7A)-H(7AB)  | 0.9700    |
| C(7A)-C(8A)   | 1.523(19) |
| C(8A)-H(8A)   | 0.9800    |
| C(8A)-C(9A)   | 1.54(2)   |
| C(8A)-C(13A)  | 1.56(2)   |
| C(9A)-C(10A)  | 1.304(19) |
| C(9A)-C(22A)  | 1.509(19) |
| C(10A)-C(11A) | 1.487(18) |
| C(10A)-C(18A) | 1.49(2)   |
| C(11A)-H(11A) | 0.9800    |
| C(11A)-C(12A) | 1.570(19) |
| C(11A)-C(16A) | 1.541(18) |
| C(12A)-H(12A) | 0.9800    |

---

|               |           |
|---------------|-----------|
| C(12A)-C(13A) | 1.50(2)   |
| C(12A)-C(15A) | 1.53(2)   |
| C(13A)-H(13A) | 0.9800    |
| C(13A)-C(14A) | 1.50(2)   |
| C(14A)-O(3A)  | 1.14(2)   |
| C(14A)-O(4A)  | 1.390(19) |
| C(15A)-O(4A)  | 1.34(2)   |
| C(15A)-O(5A)  | 1.196(19) |
| C(16A)-C(17A) | 1.46(2)   |
| C(16A)-C(21A) | 1.482(16) |
| C(16A)-C(34A) | 1.52(2)   |
| C(17A)-C(18A) | 1.337(18) |
| C(17A)-C(19A) | 1.511(10) |
| C(18A)-C(28A) | 1.504(17) |
| C(19A)-H(19A) | 0.9700    |
| C(19A)-H(19B) | 0.9700    |
| C(19A)-C(20A) | 1.523(10) |
| C(20A)-H(20C) | 0.9700    |
| C(20A)-H(20D) | 0.9700    |
| C(20A)-C(21A) | 1.516(9)  |
| C(21A)-O(6A)  | 1.20(2)   |
| C(22A)-C(23A) | 1.3900    |
| C(22A)-C(27A) | 1.3900    |
| C(23A)-H(23A) | 0.9300    |
| C(23A)-C(24A) | 1.3900    |
| C(24A)-H(24A) | 0.9300    |
| C(24A)-C(25A) | 1.3900    |
| C(25A)-H(25A) | 0.9300    |
| C(25A)-C(26A) | 1.3900    |
| C(26A)-H(26A) | 0.9300    |
| C(26A)-C(27A) | 1.3900    |
| C(27A)-H(27A) | 0.9300    |
| C(28A)-C(29A) | 1.3900    |
| C(28A)-C(33A) | 1.3900    |
| C(29A)-H(29A) | 0.9300    |
| C(29A)-C(30A) | 1.3900    |

---

|               |        |
|---------------|--------|
| C(30A)-H(30A) | 0.9300 |
| C(30A)-C(31A) | 1.3900 |
| C(31A)-H(31A) | 0.9300 |
| C(31A)-C(32A) | 1.3900 |
| C(32A)-H(32A) | 0.9300 |
| C(32A)-C(33A) | 1.3900 |
| C(33A)-H(33A) | 0.9300 |
| C(34A)-H(34A) | 0.9600 |
| C(34A)-H(34B) | 0.9600 |
| C(34A)-H(34C) | 0.9600 |

|                  |           |
|------------------|-----------|
| C(2)-C(1)-C(5)   | 109.0(15) |
| O(1)-C(1)-C(2)   | 122.7(16) |
| O(1)-C(1)-C(5)   | 128.4(16) |
| C(1)-C(2)-H(2A)  | 110.9     |
| C(1)-C(2)-H(2B)  | 110.9     |
| H(2A)-C(2)-H(2B) | 108.9     |
| C(3)-C(2)-C(1)   | 104.3(15) |
| C(3)-C(2)-H(2A)  | 110.9     |
| C(3)-C(2)-H(2B)  | 110.9     |
| C(2)-C(3)-H(3A)  | 110.3     |
| C(2)-C(3)-H(3B)  | 110.3     |
| C(2)-C(3)-C(4)   | 107.1(16) |
| H(3A)-C(3)-H(3B) | 108.5     |
| C(4)-C(3)-H(3A)  | 110.3     |
| C(4)-C(3)-H(3B)  | 110.3     |
| C(3)-C(4)-C(5)   | 109.9(15) |
| O(2)-C(4)-C(3)   | 126.6(15) |
| O(2)-C(4)-C(5)   | 122.6(16) |
| C(1)-C(5)-C(4)   | 101.0(14) |
| C(1)-C(5)-C(6)   | 109.3(14) |
| C(1)-C(5)-C(7)   | 114.4(13) |
| C(4)-C(5)-C(6)   | 110.2(14) |
| C(4)-C(5)-C(7)   | 109.1(13) |
| C(6)-C(5)-C(7)   | 112.2(12) |
| C(5)-C(6)-H(6A)  | 109.5     |

---

|                   |           |
|-------------------|-----------|
| C(5)-C(6)-H(6B)   | 109.5     |
| C(5)-C(6)-H(6C)   | 109.5     |
| H(6A)-C(6)-H(6B)  | 109.5     |
| H(6A)-C(6)-H(6C)  | 109.5     |
| H(6B)-C(6)-H(6C)  | 109.5     |
| C(5)-C(7)-H(7A)   | 107.4     |
| C(5)-C(7)-H(7B)   | 107.4     |
| H(7A)-C(7)-H(7B)  | 107.0     |
| C(8)-C(7)-C(5)    | 119.6(12) |
| C(8)-C(7)-H(7A)   | 107.4     |
| C(8)-C(7)-H(7B)   | 107.4     |
| C(7)-C(8)-H(8)    | 105.6     |
| C(7)-C(8)-C(13)   | 116.7(12) |
| C(9)-C(8)-C(7)    | 113.9(12) |
| C(9)-C(8)-H(8)    | 105.6     |
| C(9)-C(8)-C(13)   | 108.4(12) |
| C(13)-C(8)-H(8)   | 105.6     |
| C(10)-C(9)-C(8)   | 112.2(13) |
| C(10)-C(9)-C(23)  | 124.0(14) |
| C(23)-C(9)-C(8)   | 123.7(12) |
| C(9)-C(10)-C(11)  | 120.9(14) |
| C(9)-C(10)-C(16)  | 133.8(16) |
| C(16)-C(10)-C(11) | 104.2(14) |
| C(10)-C(11)-H(11) | 109.8     |
| C(12)-C(11)-C(10) | 104.4(13) |
| C(12)-C(11)-H(11) | 109.8     |
| C(12)-C(11)-C(18) | 117.1(13) |
| C(18)-C(11)-C(10) | 105.6(13) |
| C(18)-C(11)-H(11) | 109.8     |
| C(11)-C(12)-H(12) | 109.6     |
| C(11)-C(12)-C(13) | 111.8(12) |
| C(11)-C(12)-C(15) | 115.7(14) |
| C(13)-C(12)-H(12) | 109.6     |
| C(15)-C(12)-H(12) | 109.6     |
| C(15)-C(12)-C(13) | 100.3(13) |
| C(8)-C(13)-H(13)  | 109.8     |

---

|                     |           |
|---------------------|-----------|
| C(12)-C(13)-C(8)    | 111.4(12) |
| C(12)-C(13)-H(13)   | 109.8     |
| C(14)-C(13)-C(8)    | 108.6(13) |
| C(14)-C(13)-C(12)   | 107.5(14) |
| C(14)-C(13)-H(13)   | 109.8     |
| O(3)-C(14)-C(13)    | 132.9(19) |
| O(3)-C(14)-O(4)     | 118(2)    |
| O(4)-C(14)-C(13)    | 108.8(16) |
| O(4)-C(15)-C(12)    | 113.1(15) |
| O(5)-C(15)-C(12)    | 127.2(18) |
| O(5)-C(15)-O(4)     | 119.6(17) |
| C(10)-C(16)-C(29)   | 127.1(14) |
| C(17)-C(16)-C(10)   | 112.7(15) |
| C(17)-C(16)-C(29)   | 120.2(14) |
| C(16)-C(17)-C(18)   | 110.7(13) |
| C(16)-C(17)-C(21)   | 139.3(15) |
| C(18)-C(17)-C(21)   | 106.7(13) |
| C(11)-C(18)-C(19)   | 123.6(15) |
| C(11)-C(18)-C(22)   | 111.5(13) |
| C(17)-C(18)-C(11)   | 105.5(13) |
| C(17)-C(18)-C(19)   | 104.7(13) |
| C(17)-C(18)-C(22)   | 110.8(15) |
| C(19)-C(18)-C(22)   | 100.4(14) |
| C(18)-C(19)-C(20)   | 108.3(14) |
| O(6)-C(19)-C(18)    | 127.0(13) |
| O(6)-C(19)-C(20)    | 124.6(14) |
| C(19)-C(20)-H(20A)  | 110.5     |
| C(19)-C(20)-H(20B)  | 110.5     |
| H(20A)-C(20)-H(20B) | 108.7     |
| C(21)-C(20)-C(19)   | 106.2(14) |
| C(21)-C(20)-H(20A)  | 110.5     |
| C(21)-C(20)-H(20B)  | 110.5     |
| C(17)-C(21)-H(21A)  | 110.4     |
| C(17)-C(21)-H(21B)  | 110.4     |
| C(20)-C(21)-C(17)   | 106.6(13) |
| C(20)-C(21)-H(21A)  | 110.4     |

---

|                     |           |
|---------------------|-----------|
| C(20)-C(21)-H(21B)  | 110.4     |
| H(21A)-C(21)-H(21B) | 108.6     |
| C(18)-C(22)-H(22A)  | 109.5     |
| C(18)-C(22)-H(22B)  | 109.5     |
| C(18)-C(22)-H(22C)  | 109.5     |
| H(22A)-C(22)-H(22B) | 109.5     |
| H(22A)-C(22)-H(22C) | 109.5     |
| H(22B)-C(22)-H(22C) | 109.5     |
| C(28)-C(23)-C(9)    | 120.5(11) |
| C(28)-C(23)-C(24)   | 120.0     |
| C(24)-C(23)-C(9)    | 119.5(11) |
| C(23)-C(28)-H(28)   | 120.0     |
| C(27)-C(28)-C(23)   | 120.0     |
| C(27)-C(28)-H(28)   | 120.0     |
| C(28)-C(27)-H(27)   | 120.0     |
| C(28)-C(27)-C(26)   | 120.0     |
| C(26)-C(27)-H(27)   | 120.0     |
| C(27)-C(26)-H(26)   | 120.0     |
| C(27)-C(26)-C(25)   | 120.0     |
| C(25)-C(26)-H(26)   | 120.0     |
| C(26)-C(25)-H(25)   | 120.0     |
| C(26)-C(25)-C(24)   | 120.0     |
| C(24)-C(25)-H(25)   | 120.0     |
| C(23)-C(24)-H(24)   | 120.0     |
| C(25)-C(24)-C(23)   | 120.0     |
| C(25)-C(24)-H(24)   | 120.0     |
| C(30)-C(29)-C(16)   | 118.8(13) |
| C(30)-C(29)-C(34)   | 120.0     |
| C(34)-C(29)-C(16)   | 121.0(13) |
| C(29)-C(30)-H(30)   | 120.0     |
| C(31)-C(30)-C(29)   | 120.0     |
| C(31)-C(30)-H(30)   | 120.0     |
| C(30)-C(31)-H(31)   | 120.0     |
| C(32)-C(31)-C(30)   | 120.0     |
| C(32)-C(31)-H(31)   | 120.0     |
| C(31)-C(32)-H(32)   | 120.0     |



---

|                     |           |
|---------------------|-----------|
| C(31)-C(32)-C(33)   | 120.0     |
| C(33)-C(32)-H(32)   | 120.0     |
| C(32)-C(33)-H(33)   | 120.0     |
| C(34)-C(33)-C(32)   | 120.0     |
| C(34)-C(33)-H(33)   | 120.0     |
| C(29)-C(34)-H(34)   | 120.0     |
| C(33)-C(34)-C(29)   | 120.0     |
| C(33)-C(34)-H(34)   | 120.0     |
| C(15)-O(4)-C(14)    | 109.6(15) |
| C(2A)-C(1A)-C(5A)   | 108.4(19) |
| O(1A)-C(1A)-C(2A)   | 128(2)    |
| O(1A)-C(1A)-C(5A)   | 123.7(17) |
| C(1A)-C(2A)-H(2AA)  | 110.2     |
| C(1A)-C(2A)-H(2AB)  | 110.2     |
| C(1A)-C(2A)-C(3A)   | 107.5(18) |
| H(2AA)-C(2A)-H(2AB) | 108.5     |
| C(3A)-C(2A)-H(2AA)  | 110.2     |
| C(3A)-C(2A)-H(2AB)  | 110.2     |
| C(2A)-C(3A)-H(3AA)  | 110.9     |
| C(2A)-C(3A)-H(3AB)  | 110.9     |
| H(3AA)-C(3A)-H(3AB) | 108.9     |
| C(4A)-C(3A)-C(2A)   | 104.2(16) |
| C(4A)-C(3A)-H(3AA)  | 110.9     |
| C(4A)-C(3A)-H(3AB)  | 110.9     |
| C(3A)-C(4A)-C(5A)   | 112.2(17) |
| O(2A)-C(4A)-C(3A)   | 121.2(19) |
| O(2A)-C(4A)-C(5A)   | 126.4(19) |
| C(1A)-C(5A)-C(6A)   | 110.7(14) |
| C(1A)-C(5A)-C(7A)   | 114.8(14) |
| C(4A)-C(5A)-C(1A)   | 103.0(15) |
| C(4A)-C(5A)-C(6A)   | 110.2(14) |
| C(4A)-C(5A)-C(7A)   | 104.6(14) |
| C(6A)-C(5A)-C(7A)   | 112.8(12) |
| C(5A)-C(6A)-H(6AA)  | 109.5     |
| C(5A)-C(6A)-H(6AB)  | 109.5     |
| C(5A)-C(6A)-H(6AC)  | 109.5     |

---

|                      |           |
|----------------------|-----------|
| H(6AA)-C(6A)-H(6AB)  | 109.5     |
| H(6AA)-C(6A)-H(6AC)  | 109.5     |
| H(6AB)-C(6A)-H(6AC)  | 109.5     |
| C(5A)-C(7A)-H(7AA)   | 107.6     |
| C(5A)-C(7A)-H(7AB)   | 107.6     |
| H(7AA)-C(7A)-H(7AB)  | 107.0     |
| C(8A)-C(7A)-C(5A)    | 118.9(13) |
| C(8A)-C(7A)-H(7AA)   | 107.6     |
| C(8A)-C(7A)-H(7AB)   | 107.6     |
| C(7A)-C(8A)-H(8A)    | 105.7     |
| C(7A)-C(8A)-C(9A)    | 118.4(14) |
| C(7A)-C(8A)-C(13A)   | 113.2(12) |
| C(9A)-C(8A)-H(8A)    | 105.7     |
| C(9A)-C(8A)-C(13A)   | 107.1(13) |
| C(13A)-C(8A)-H(8A)   | 105.7     |
| C(10A)-C(9A)-C(8A)   | 113.9(15) |
| C(10A)-C(9A)-C(22A)  | 126.3(14) |
| C(22A)-C(9A)-C(8A)   | 119.7(14) |
| C(9A)-C(10A)-C(11A)  | 122.5(14) |
| C(9A)-C(10A)-C(18A)  | 130.4(15) |
| C(11A)-C(10A)-C(18A) | 106.0(13) |
| C(10A)-C(11A)-H(11A) | 109.0     |
| C(10A)-C(11A)-C(12A) | 103.3(11) |
| C(10A)-C(11A)-C(16A) | 106.5(12) |
| C(12A)-C(11A)-H(11A) | 109.0     |
| C(16A)-C(11A)-H(11A) | 109.0     |
| C(16A)-C(11A)-C(12A) | 119.6(13) |
| C(11A)-C(12A)-H(12A) | 110.9     |
| C(13A)-C(12A)-C(11A) | 113.5(14) |
| C(13A)-C(12A)-H(12A) | 110.9     |
| C(13A)-C(12A)-C(15A) | 100.5(14) |
| C(15A)-C(12A)-C(11A) | 109.7(13) |
| C(15A)-C(12A)-H(12A) | 110.9     |
| C(8A)-C(13A)-H(13A)  | 108.6     |
| C(12A)-C(13A)-C(8A)  | 112.3(14) |
| C(12A)-C(13A)-H(13A) | 108.6     |

---

|                      |           |
|----------------------|-----------|
| C(14A)-C(13A)-C(8A)  | 111.8(14) |
| C(14A)-C(13A)-C(12A) | 106.9(14) |
| C(14A)-C(13A)-H(13A) | 108.6     |
| O(3A)-C(14A)-C(13A)  | 132.5(19) |
| O(3A)-C(14A)-O(4A)   | 121(2)    |
| O(4A)-C(14A)-C(13A)  | 106.6(16) |
| O(4A)-C(15A)-C(12A)  | 110.6(17) |
| O(5A)-C(15A)-C(12A)  | 126.8(19) |
| O(5A)-C(15A)-O(4A)   | 122(2)    |
| C(17A)-C(16A)-C(11A) | 103.7(12) |
| C(17A)-C(16A)-C(21A) | 107.1(16) |
| C(17A)-C(16A)-C(34A) | 112.5(15) |
| C(21A)-C(16A)-C(11A) | 120.7(14) |
| C(21A)-C(16A)-C(34A) | 104.7(15) |
| C(34A)-C(16A)-C(11A) | 108.3(14) |
| C(16A)-C(17A)-C(19A) | 106.8(14) |
| C(18A)-C(17A)-C(16A) | 113.6(13) |
| C(18A)-C(17A)-C(19A) | 136.0(17) |
| C(10A)-C(18A)-C(28A) | 130.2(14) |
| C(17A)-C(18A)-C(10A) | 109.8(14) |
| C(17A)-C(18A)-C(28A) | 120.0(15) |
| C(17A)-C(19A)-H(19A) | 111.2     |
| C(17A)-C(19A)-H(19B) | 111.2     |
| C(17A)-C(19A)-C(20A) | 103.0(14) |
| H(19A)-C(19A)-H(19B) | 109.1     |
| C(20A)-C(19A)-H(19A) | 111.2     |
| C(20A)-C(19A)-H(19B) | 111.2     |
| C(19A)-C(20A)-H(20C) | 110.1     |
| C(19A)-C(20A)-H(20D) | 110.1     |
| H(20C)-C(20A)-H(20D) | 108.4     |
| C(21A)-C(20A)-C(19A) | 108.0(16) |
| C(21A)-C(20A)-H(20C) | 110.1     |
| C(21A)-C(20A)-H(20D) | 110.1     |
| C(16A)-C(21A)-C(20A) | 105.6(17) |
| O(6A)-C(21A)-C(16A)  | 130.7(18) |
| O(6A)-C(21A)-C(20A)  | 123.5(18) |

---

|                      |           |
|----------------------|-----------|
| C(23A)-C(22A)-C(9A)  | 120.2(11) |
| C(23A)-C(22A)-C(27A) | 120.0     |
| C(27A)-C(22A)-C(9A)  | 119.4(11) |
| C(22A)-C(23A)-H(23A) | 120.0     |
| C(24A)-C(23A)-C(22A) | 120.0     |
| C(24A)-C(23A)-H(23A) | 120.0     |
| C(23A)-C(24A)-H(24A) | 120.0     |
| C(23A)-C(24A)-C(25A) | 120.0     |
| C(25A)-C(24A)-H(24A) | 120.0     |
| C(24A)-C(25A)-H(25A) | 120.0     |
| C(24A)-C(25A)-C(26A) | 120.0     |
| C(26A)-C(25A)-H(25A) | 120.0     |
| C(25A)-C(26A)-H(26A) | 120.0     |
| C(27A)-C(26A)-C(25A) | 120.0     |
| C(27A)-C(26A)-H(26A) | 120.0     |
| C(22A)-C(27A)-H(27A) | 120.0     |
| C(26A)-C(27A)-C(22A) | 120.0     |
| C(26A)-C(27A)-H(27A) | 120.0     |
| C(29A)-C(28A)-C(18A) | 121.0(12) |
| C(29A)-C(28A)-C(33A) | 120.0     |
| C(33A)-C(28A)-C(18A) | 119.0(12) |
| C(28A)-C(29A)-H(29A) | 120.0     |
| C(28A)-C(29A)-C(30A) | 120.0     |
| C(30A)-C(29A)-H(29A) | 120.0     |
| C(29A)-C(30A)-H(30A) | 120.0     |
| C(29A)-C(30A)-C(31A) | 120.0     |
| C(31A)-C(30A)-H(30A) | 120.0     |
| C(30A)-C(31A)-H(31A) | 120.0     |
| C(32A)-C(31A)-C(30A) | 120.0     |
| C(32A)-C(31A)-H(31A) | 120.0     |
| C(31A)-C(32A)-H(32A) | 120.0     |
| C(33A)-C(32A)-C(31A) | 120.0     |
| C(33A)-C(32A)-H(32A) | 120.0     |
| C(28A)-C(33A)-H(33A) | 120.0     |
| C(32A)-C(33A)-C(28A) | 120.0     |
| C(32A)-C(33A)-H(33A) | 120.0     |

---

|                      |           |
|----------------------|-----------|
| C(16A)-C(34A)-H(34A) | 109.5     |
| C(16A)-C(34A)-H(34B) | 109.5     |
| C(16A)-C(34A)-H(34C) | 109.5     |
| H(34A)-C(34A)-H(34B) | 109.5     |
| H(34A)-C(34A)-H(34C) | 109.5     |
| H(34B)-C(34A)-H(34C) | 109.5     |
| C(15A)-O(4A)-C(14A)  | 112.2(17) |

---

Symmetry transformations used to generate equivalent atoms:

Table 11. Anisotropic displacement parameters ( $\text{\AA}^2 \times 10^3$ ) for **8**. The anisotropic displacement factor exponent takes the form:  $-2p^2[h^2 a^*2U^{11} + \dots + 2hka^*b^*U^{12}]$

|       | U <sup>11</sup> | U <sup>22</sup> | U <sup>33</sup> | U <sup>23</sup> | U <sup>13</sup> | U <sup>12</sup> |
|-------|-----------------|-----------------|-----------------|-----------------|-----------------|-----------------|
| C(1)  | 77(15)          | 56(12)          | 101(15)         | -19(11)         | -5(11)          | 10(11)          |
| C(2)  | 96(10)          | 114(10)         | 100(10)         | 11(8)           | 13(8)           | 3(9)            |
| C(3)  | 105(19)         | 122(18)         | 123(16)         | -3(14)          | 51(16)          | 14(15)          |
| C(4)  | 73(16)          | 111(16)         | 56(12)          | -11(11)         | -20(12)         | 0(12)           |
| C(5)  | 63(13)          | 93(14)          | 57(12)          | 8(10)           | 7(9)            | 21(11)          |
| C(6)  | 74(15)          | 109(15)         | 75(12)          | 10(11)          | -4(10)          | -23(12)         |
| C(7)  | 86(14)          | 70(11)          | 37(10)          | 12(9)           | -1(9)           | 0(10)           |
| C(8)  | 74(13)          | 66(11)          | 58(11)          | -10(9)          | 15(9)           | 1(9)            |
| C(9)  | 77(13)          | 47(11)          | 50(11)          | 2(9)            | -10(9)          | -2(8)           |
| C(10) | 64(13)          | 63(12)          | 64(12)          | -9(10)          | 5(9)            | 0(9)            |
| C(11) | 39(11)          | 83(13)          | 70(11)          | -21(9)          | 5(9)            | -8(9)           |
| C(12) | 49(12)          | 85(13)          | 68(11)          | 28(9)           | -3(9)           | 7(10)           |
| C(13) | 54(8)           | 67(8)           | 60(8)           | -6(7)           | -4(7)           | 6(7)            |
| C(14) | 83(10)          | 87(9)           | 79(9)           | 8(8)            | 5(8)            | 23(8)           |
| C(15) | 76(10)          | 75(9)           | 73(9)           | 10(8)           | 14(8)           | 2(7)            |
| C(16) | 99(16)          | 52(12)          | 74(13)          | 5(10)           | -11(10)         | 12(9)           |
| C(17) | 114(16)         | 68(13)          | 63(11)          | 14(10)          | -25(10)         | -13(10)         |
| C(18) | 88(10)          | 82(9)           | 99(10)          | -3(8)           | -11(8)          | 12(8)           |
| C(19) | 79(9)           | 68(9)           | 74(9)           | 13(7)           | -2(7)           | 11(8)           |
| C(20) | 107(10)         | 123(10)         | 86(9)           | -2(8)           | -10(8)          | 8(8)            |
| C(21) | 130(11)         | 101(10)         | 81(9)           | -7(8)           | -15(8)          | 2(8)            |
| C(22) | 124(19)         | 63(12)          | 75(12)          | -1(9)           | -25(11)         | 16(12)          |
| C(23) | 67(14)          | 53(12)          | 86(13)          | -2(9)           | 18(10)          | -14(10)         |
| C(28) | 110(18)         | 51(13)          | 133(17)         | -26(11)         | 13(13)          | -25(11)         |
| C(27) | 89(9)           | 76(9)           | 68(8)           | 15(7)           | 14(7)           | -17(8)          |
| C(26) | 104(17)         | 81(14)          | 96(14)          | 12(11)          | 18(12)          | -4(12)          |
| C(25) | 94(10)          | 76(9)           | 107(9)          | 3(8)            | 4(8)            | 16(8)           |
| C(24) | 80(9)           | 61(8)           | 70(8)           | -5(7)           | 0(7)            | -6(7)           |
| C(29) | 83(15)          | 90(15)          | 54(11)          | 7(10)           | 4(10)           | 18(11)          |
| C(30) | 133(11)         | 111(11)         | 125(11)         | -12(9)          | 15(9)           | -8(9)           |
| C(31) | 135(11)         | 108(10)         | 132(10)         | -11(8)          | 8(9)            | -29(9)          |

---

|        |         |         |         |         |         |         |
|--------|---------|---------|---------|---------|---------|---------|
| C(32)  | 119(10) | 80(9)   | 117(10) | 4(8)    | 2(8)    | 0(8)    |
| C(33)  | 138(12) | 118(11) | 135(11) | -11(9)  | 11(9)   | 9(9)    |
| C(34)  | 126(11) | 109(11) | 130(11) | 4(8)    | -2(9)   | 0(9)    |
| O(1)   | 138(13) | 78(10)  | 102(10) | -19(7)  | -7(8)   | 33(9)   |
| O(2)   | 102(12) | 136(12) | 102(9)  | 32(8)   | -18(9)  | 19(10)  |
| O(3)   | 111(11) | 103(10) | 82(9)   | -4(8)   | -3(8)   | 1(8)    |
| O(4)   | 79(9)   | 93(9)   | 103(9)  | 0(7)    | -16(8)  | -9(7)   |
| O(5)   | 120(12) | 137(11) | 67(8)   | 7(8)    | -36(8)  | 6(8)    |
| O(6)   | 162(13) | 82(9)   | 84(8)   | -4(7)   | -28(8)  | 70(9)   |
| C(1A)  | 88(10)  | 98(10)  | 79(9)   | 11(8)   | -6(8)   | -3(8)   |
| C(2A)  | 112(11) | 122(10) | 100(10) | 0(8)    | -9(8)   | -2(9)   |
| C(3A)  | 99(10)  | 104(10) | 104(9)  | -16(8)  | -8(8)   | 0(8)    |
| C(4A)  | 82(18)  | 66(13)  | 92(16)  | -2(12)  | -1(13)  | -6(11)  |
| C(5A)  | 67(14)  | 73(13)  | 62(11)  | -4(10)  | -15(9)  | 10(10)  |
| C(6A)  | 85(12)  | 93(12)  | 83(11)  | -8(9)   | -22(9)  | -13(10) |
| C(7A)  | 42(11)  | 66(12)  | 111(16) | -18(11) | -11(10) | 20(8)   |
| C(8A)  | 32(11)  | 79(12)  | 74(13)  | 20(10)  | -3(8)   | -5(9)   |
| C(9A)  | 36(11)  | 92(14)  | 67(13)  | 23(11)  | 7(9)    | -13(9)  |
| C(10A) | 60(13)  | 64(12)  | 59(12)  | 16(10)  | -26(9)  | -4(8)   |
| C(11A) | 58(8)   | 45(7)   | 49(7)   | -6(6)   | -14(6)  | 10(6)   |
| C(12A) | 90(15)  | 41(11)  | 88(14)  | 5(9)    | -8(11)  | -5(10)  |
| C(13A) | 58(14)  | 65(12)  | 75(13)  | 13(9)   | -17(10) | -29(10) |
| C(14A) | 68(16)  | 88(15)  | 70(15)  | 5(13)   | 22(12)  | 26(12)  |
| C(15A) | 106(18) | 95(16)  | 56(13)  | -19(13) | -13(14) | 37(13)  |
| C(16A) | 87(15)  | 82(14)  | 50(11)  | -27(10) | -15(10) | 14(11)  |
| C(17A) | 119(17) | 60(13)  | 54(12)  | 13(11)  | -15(10) | 16(10)  |
| C(18A) | 64(13)  | 48(11)  | 85(14)  | -16(11) | 17(10)  | 1(9)    |
| C(19A) | 129(19) | 78(14)  | 69(14)  | 5(10)   | -19(12) | 2(12)   |
| C(20A) | 200(30) | 92(16)  | 93(16)  | -15(13) | -23(15) | 35(16)  |
| C(21A) | 103(10) | 96(10)  | 98(10)  | -3(9)   | -7(8)   | 16(8)   |
| C(22A) | 95(16)  | 61(13)  | 61(11)  | -1(10)  | -23(10) | 2(11)   |
| C(23A) | 150(20) | 48(12)  | 80(13)  | -29(10) | -39(12) | 16(11)  |
| C(24A) | 120(20) | 105(19) | 84(14)  | -28(13) | -16(13) | -37(14) |
| C(25A) | 200(30) | 79(15)  | 109(17) | -15(13) | 7(17)   | 32(18)  |
| C(26A) | 115(11) | 103(10) | 91(9)   | 5(8)    | 2(8)    | 15(9)   |
| C(27A) | 106(18) | 60(12)  | 76(12)  | 0(10)   | 1(11)   | 8(11)   |

---

|        |         |         |         |        |         |         |
|--------|---------|---------|---------|--------|---------|---------|
| C(28A) | 96(17)  | 73(14)  | 81(13)  | 16(10) | -6(11)  | 25(12)  |
| C(29A) | 97(18)  | 105(18) | 78(13)  | 19(12) | 13(11)  | 1(14)   |
| C(30A) | 180(30) | 53(14)  | 105(16) | 1(12)  | 17(15)  | -14(14) |
| C(31A) | 180(30) | 71(15)  | 120(18) | 11(12) | -12(17) | 19(17)  |
| C(32A) | 99(10)  | 94(10)  | 102(10) | 0(8)   | -3(8)   | 24(8)   |
| C(33A) | 95(10)  | 86(9)   | 87(9)   | 16(7)  | -4(8)   | 4(8)    |
| C(34A) | 170(20) | 47(12)  | 99(14)  | -3(10) | -48(14) | -4(12)  |
| O(1A)  | 114(12) | 112(11) | 90(9)   | 8(8)   | -6(8)   | 48(9)   |
| O(2A)  | 100(12) | 130(12) | 79(9)   | -14(8) | -16(8)  | 16(9)   |
| O(3A)  | 98(11)  | 111(10) | 100(10) | 9(8)   | -38(9)  | -11(8)  |
| O(4A)  | 84(10)  | 107(10) | 64(9)   | -10(7) | -7(8)   | -10(7)  |
| O(5A)  | 72(9)   | 116(10) | 78(9)   | -9(8)  | 8(7)    | 1(7)    |
| O(6A)  | 160(14) | 108(11) | 74(8)   | -3(7)  | -1(8)   | 51(9)   |

---



Table 12. Hydrogen coordinates ( $\times 10^4$ ) and isotropic displacement parameters ( $\text{\AA}^2 \times 10^3$ ) for **8**.

|        | x     | y    | z     | U(eq) |
|--------|-------|------|-------|-------|
| H(2A)  | -6600 | 8150 | 1179  | 124   |
| H(2B)  | -6812 | 7566 | 670   | 124   |
| H(3A)  | -4408 | 7034 | 1199  | 138   |
| H(3B)  | -3852 | 7697 | 1587  | 138   |
| H(6A)  | -2041 | 8891 | -287  | 129   |
| H(6B)  | -278  | 8414 | -55   | 129   |
| H(6C)  | -1342 | 8894 | 419   | 129   |
| H(7A)  | -2098 | 7259 | -381  | 77    |
| H(7B)  | -4395 | 7230 | -278  | 77    |
| H(8)   | -2598 | 8130 | -1099 | 79    |
| H(11)  | -3011 | 8569 | -2003 | 76    |
| H(12)  | -6221 | 8974 | -1835 | 81    |
| H(13)  | -5646 | 8655 | -858  | 73    |
| H(20A) | -8153 | 8340 | -3756 | 127   |
| H(20B) | -6566 | 8727 | -4154 | 127   |
| H(21A) | -4482 | 7854 | -4113 | 125   |
| H(21B) | -6335 | 7418 | -3908 | 125   |
| H(22A) | -2461 | 9270 | -2968 | 132   |
| H(22B) | -2547 | 8812 | -3570 | 132   |
| H(22C) | -1292 | 8573 | -2977 | 132   |
| H(28)  | -5753 | 6348 | -935  | 117   |
| H(27)  | -5134 | 5192 | -757  | 93    |
| H(26)  | -2247 | 4690 | -1119 | 112   |
| H(25)  | 21    | 5344 | -1659 | 111   |
| H(24)  | -597  | 6500 | -1837 | 85    |
| H(30)  | -7256 | 6413 | -2458 | 147   |
| H(31)  | -7896 | 5288 | -2757 | 150   |
| H(32)  | -5639 | 4704 | -3361 | 126   |
| H(33)  | -2740 | 5246 | -3667 | 156   |
| H(34)  | -2099 | 6371 | -3369 | 146   |
| H(2AA) | 2225  | 797  | -737  | 134   |

---

|        |       |      |       |     |
|--------|-------|------|-------|-----|
| H(2AB) | 1861  | 144  | -323  | 134 |
| H(3AA) | -603  | 655  | 170   | 123 |
| H(3AB) | 138   | 1347 | -127  | 123 |
| H(6AA) | -3308 | -212 | -1772 | 131 |
| H(6AB) | -4803 | 286  | -1453 | 131 |
| H(6AC) | -3690 | -282 | -1057 | 131 |
| H(7AA) | -2777 | 1456 | -1660 | 88  |
| H(7AB) | -452  | 1378 | -1656 | 88  |
| H(8A)  | -2950 | 639  | -2482 | 74  |
| H(11A) | -3133 | 310  | -3483 | 61  |
| H(12A) | 388   | -40  | -3436 | 88  |
| H(13A) | 109   | 111  | -2435 | 80  |
| H(19A) | -1610 | 1796 | -5333 | 111 |
| H(19B) | -3344 | 1271 | -5506 | 111 |
| H(20C) | -897  | 536  | -5703 | 154 |
| H(20D) | 713   | 982  | -5334 | 154 |
| H(23A) | 441   | 2374 | -2351 | 111 |
| H(24A) | 237   | 3534 | -2120 | 124 |
| H(25A) | -2745 | 4121 | -2309 | 153 |
| H(26A) | -5523 | 3548 | -2728 | 123 |
| H(27A) | -5320 | 2388 | -2958 | 97  |
| H(29A) | 42    | 2720 | -3936 | 112 |
| H(30A) | -226  | 3889 | -4126 | 134 |
| H(31A) | -3256 | 4351 | -4482 | 148 |
| H(32A) | -6019 | 3644 | -4648 | 118 |
| H(33A) | -5752 | 2476 | -4458 | 107 |
| H(34A) | -3814 | -343 | -4494 | 161 |
| H(34B) | -4564 | 210  | -4979 | 161 |
| H(34C) | -5242 | 247  | -4287 | 161 |

---

Table 13. Torsion angles [°] for **8**.

|                        |            |
|------------------------|------------|
| C(1)-C(2)-C(3)-C(4)    | -14(2)     |
| C(1)-C(5)-C(7)-C(8)    | 75.5(19)   |
| C(2)-C(1)-C(5)-C(4)    | -29.6(18)  |
| C(2)-C(1)-C(5)-C(6)    | -145.8(14) |
| C(2)-C(1)-C(5)-C(7)    | 87.4(16)   |
| C(2)-C(3)-C(4)-C(5)    | -4(2)      |
| C(2)-C(3)-C(4)-O(2)    | -173.9(19) |
| C(3)-C(4)-C(5)-C(1)    | 20.4(18)   |
| C(3)-C(4)-C(5)-C(6)    | 135.9(15)  |
| C(3)-C(4)-C(5)-C(7)    | -100.4(16) |
| C(4)-C(5)-C(7)-C(8)    | -172.3(14) |
| C(5)-C(1)-C(2)-C(3)    | 28(2)      |
| C(5)-C(7)-C(8)-C(9)    | 171.5(13)  |
| C(5)-C(7)-C(8)-C(13)   | -61(2)     |
| C(6)-C(5)-C(7)-C(8)    | -49.8(19)  |
| C(7)-C(8)-C(9)-C(10)   | -176.3(14) |
| C(7)-C(8)-C(9)-C(23)   | 1(2)       |
| C(7)-C(8)-C(13)-C(12)  | -177.9(13) |
| C(7)-C(8)-C(13)-C(14)  | -59.6(18)  |
| C(8)-C(9)-C(10)-C(11)  | 0(2)       |
| C(8)-C(9)-C(10)-C(16)  | -166.1(17) |
| C(8)-C(9)-C(23)-C(28)  | 65.4(16)   |
| C(8)-C(9)-C(23)-C(24)  | -115.3(14) |
| C(8)-C(13)-C(14)-O(3)  | 64(3)      |
| C(8)-C(13)-C(14)-O(4)  | -121.3(13) |
| C(9)-C(8)-C(13)-C(12)  | -47.6(17)  |
| C(9)-C(8)-C(13)-C(14)  | 70.6(16)   |
| C(9)-C(10)-C(11)-C(12) | -57.3(19)  |
| C(9)-C(10)-C(11)-C(18) | 178.7(15)  |
| C(9)-C(10)-C(16)-C(17) | 176.6(19)  |
| C(9)-C(10)-C(16)-C(29) | 0(3)       |
| C(9)-C(23)-C(28)-C(27) | 179.3(11)  |
| C(9)-C(23)-C(24)-C(25) | -179.3(11) |
| C(10)-C(9)-C(23)-C(28) | -117.3(15) |

---

|                         |            |
|-------------------------|------------|
| C(10)-C(9)-C(23)-C(24)  | 62.0(17)   |
| C(10)-C(11)-C(12)-C(13) | 55.8(16)   |
| C(10)-C(11)-C(12)-C(15) | -58.1(16)  |
| C(10)-C(11)-C(18)-C(17) | 10.5(17)   |
| C(10)-C(11)-C(18)-C(19) | 130.4(16)  |
| C(10)-C(11)-C(18)-C(22) | -109.9(14) |
| C(10)-C(16)-C(17)-C(18) | -2(2)      |
| C(10)-C(16)-C(17)-C(21) | -158(2)    |
| C(10)-C(16)-C(29)-C(30) | 70.5(18)   |
| C(10)-C(16)-C(29)-C(34) | -113.8(16) |
| C(11)-C(10)-C(16)-C(17) | 8.6(19)    |
| C(11)-C(10)-C(16)-C(29) | -167.7(15) |
| C(11)-C(12)-C(13)-C(8)  | -8.1(19)   |
| C(11)-C(12)-C(13)-C(14) | -126.9(15) |
| C(11)-C(12)-C(15)-O(4)  | 127.8(15)  |
| C(11)-C(12)-C(15)-O(5)  | -49(2)     |
| C(11)-C(18)-C(19)-C(20) | -136.4(17) |
| C(11)-C(18)-C(19)-O(6)  | 47(3)      |
| C(12)-C(11)-C(18)-C(17) | -105.1(16) |
| C(12)-C(11)-C(18)-C(19) | 15(2)      |
| C(12)-C(11)-C(18)-C(22) | 134.5(15)  |
| C(12)-C(13)-C(14)-O(3)  | -175.2(19) |
| C(12)-C(13)-C(14)-O(4)  | -0.6(18)   |
| C(12)-C(15)-O(4)-C(14)  | -8.4(19)   |
| C(13)-C(8)-C(9)-C(10)   | 51.9(17)   |
| C(13)-C(8)-C(9)-C(23)   | -130.6(14) |
| C(13)-C(12)-C(15)-O(4)  | 7.5(18)    |
| C(13)-C(12)-C(15)-O(5)  | -168.9(17) |
| C(13)-C(14)-O(4)-C(15)  | 5.4(18)    |
| C(15)-C(12)-C(13)-C(8)  | 115.0(14)  |
| C(15)-C(12)-C(13)-C(14) | -3.8(17)   |
| C(16)-C(10)-C(11)-C(12) | 112.7(14)  |
| C(16)-C(10)-C(11)-C(18) | -11.4(16)  |
| C(16)-C(17)-C(18)-C(11) | -6(2)      |
| C(16)-C(17)-C(18)-C(19) | -137.4(17) |
| C(16)-C(17)-C(18)-C(22) | 115.2(17)  |

---

|                         |            |
|-------------------------|------------|
| C(16)-C(17)-C(21)-C(20) | 129(2)     |
| C(16)-C(29)-C(30)-C(31) | 175.7(11)  |
| C(16)-C(29)-C(34)-C(33) | -175.6(11) |
| C(17)-C(16)-C(29)-C(30) | -105.5(17) |
| C(17)-C(16)-C(29)-C(34) | 70.2(19)   |
| C(17)-C(18)-C(19)-C(20) | -16(2)     |
| C(17)-C(18)-C(19)-O(6)  | 167.3(19)  |
| C(18)-C(11)-C(12)-C(13) | 172.1(13)  |
| C(18)-C(11)-C(12)-C(15) | 58(2)      |
| C(18)-C(17)-C(21)-C(20) | -27(2)     |
| C(18)-C(19)-C(20)-C(21) | 0(2)       |
| C(19)-C(20)-C(21)-C(17) | 17(2)      |
| C(21)-C(17)-C(18)-C(11) | 158.1(14)  |
| C(21)-C(17)-C(18)-C(19) | 26(2)      |
| C(21)-C(17)-C(18)-C(22) | -81.1(17)  |
| C(22)-C(18)-C(19)-C(20) | 98.8(15)   |
| C(22)-C(18)-C(19)-O(6)  | -78(2)     |
| C(23)-C(9)-C(10)-C(11)  | -177.2(13) |
| C(23)-C(9)-C(10)-C(16)  | 16(3)      |
| C(23)-C(28)-C(27)-C(26) | 0.0        |
| C(28)-C(23)-C(24)-C(25) | 0.0        |
| C(28)-C(27)-C(26)-C(25) | 0.0        |
| C(27)-C(26)-C(25)-C(24) | 0.0        |
| C(26)-C(25)-C(24)-C(23) | 0.0        |
| C(24)-C(23)-C(28)-C(27) | 0.0        |
| C(29)-C(16)-C(17)-C(18) | 174.6(15)  |
| C(29)-C(16)-C(17)-C(21) | 19(3)      |
| C(29)-C(30)-C(31)-C(32) | 0.0        |
| C(30)-C(29)-C(34)-C(33) | 0.0        |
| C(30)-C(31)-C(32)-C(33) | 0.0        |
| C(31)-C(32)-C(33)-C(34) | 0.0        |
| C(32)-C(33)-C(34)-C(29) | 0.0        |
| C(34)-C(29)-C(30)-C(31) | 0.0        |
| O(1)-C(1)-C(2)-C(3)     | -152.8(18) |
| O(1)-C(1)-C(5)-C(4)     | 151.2(18)  |
| O(1)-C(1)-C(5)-C(6)     | 35(2)      |

---

|                            |            |
|----------------------------|------------|
| O(1)-C(1)-C(5)-C(7)        | -92(2)     |
| O(2)-C(4)-C(5)-C(1)        | -169.5(18) |
| O(2)-C(4)-C(5)-C(6)        | -54(2)     |
| O(2)-C(4)-C(5)-C(7)        | 70(2)      |
| O(3)-C(14)-O(4)-C(15)      | -179.0(16) |
| O(5)-C(15)-O(4)-C(14)      | 168.2(16)  |
| O(6)-C(19)-C(20)-C(21)     | 176.4(19)  |
| C(1A)-C(2A)-C(3A)-C(4A)    | -13(2)     |
| C(1A)-C(5A)-C(7A)-C(8A)    | 80.7(19)   |
| C(2A)-C(1A)-C(5A)-C(4A)    | -21.2(19)  |
| C(2A)-C(1A)-C(5A)-C(6A)    | -139.0(16) |
| C(2A)-C(1A)-C(5A)-C(7A)    | 91.9(18)   |
| C(2A)-C(3A)-C(4A)-C(5A)    | -1(2)      |
| C(2A)-C(3A)-C(4A)-O(2A)    | 174.9(19)  |
| C(3A)-C(4A)-C(5A)-C(1A)    | 13(2)      |
| C(3A)-C(4A)-C(5A)-C(6A)    | 131.3(16)  |
| C(3A)-C(4A)-C(5A)-C(7A)    | -107.2(16) |
| C(4A)-C(5A)-C(7A)-C(8A)    | -167.2(14) |
| C(5A)-C(1A)-C(2A)-C(3A)    | 22(2)      |
| C(5A)-C(7A)-C(8A)-C(9A)    | 164.9(13)  |
| C(5A)-C(7A)-C(8A)-C(13A)   | -68.5(17)  |
| C(6A)-C(5A)-C(7A)-C(8A)    | -47.4(19)  |
| C(7A)-C(8A)-C(9A)-C(10A)   | -174.8(14) |
| C(7A)-C(8A)-C(9A)-C(22A)   | 2(2)       |
| C(7A)-C(8A)-C(13A)-C(12A)  | -175.7(13) |
| C(7A)-C(8A)-C(13A)-C(14A)  | -55.5(18)  |
| C(8A)-C(9A)-C(10A)-C(11A)  | -7(2)      |
| C(8A)-C(9A)-C(10A)-C(18A)  | -173.6(15) |
| C(8A)-C(9A)-C(22A)-C(23A)  | 68.9(14)   |
| C(8A)-C(9A)-C(22A)-C(27A)  | -118.9(12) |
| C(8A)-C(13A)-C(14A)-O(3A)  | 68(3)      |
| C(8A)-C(13A)-C(14A)-O(4A)  | -110.8(14) |
| C(9A)-C(8A)-C(13A)-C(12A)  | -43.3(17)  |
| C(9A)-C(8A)-C(13A)-C(14A)  | 76.9(18)   |
| C(9A)-C(10A)-C(11A)-C(12A) | -48(2)     |
| C(9A)-C(10A)-C(11A)-C(16A) | -175.1(15) |

---

|                             |            |
|-----------------------------|------------|
| C(9A)-C(10A)-C(18A)-C(17A)  | 172.9(17)  |
| C(9A)-C(10A)-C(18A)-C(28A)  | -4(3)      |
| C(9A)-C(22A)-C(23A)-C(24A)  | 172.2(11)  |
| C(9A)-C(22A)-C(27A)-C(26A)  | -172.3(11) |
| C(10A)-C(9A)-C(22A)-C(23A)  | -114.3(16) |
| C(10A)-C(9A)-C(22A)-C(27A)  | 57.9(19)   |
| C(10A)-C(11A)-C(12A)-C(13A) | 55.3(17)   |
| C(10A)-C(11A)-C(12A)-C(15A) | -56.3(17)  |
| C(10A)-C(11A)-C(16A)-C(17A) | 4.8(18)    |
| C(10A)-C(11A)-C(16A)-C(21A) | 124.6(18)  |
| C(10A)-C(11A)-C(16A)-C(34A) | -115.0(15) |
| C(10A)-C(18A)-C(28A)-C(29A) | 71.3(19)   |
| C(10A)-C(18A)-C(28A)-C(33A) | -110.0(16) |
| C(11A)-C(10A)-C(18A)-C(17A) | 4.9(18)    |
| C(11A)-C(10A)-C(18A)-C(28A) | -172.3(15) |
| C(11A)-C(12A)-C(13A)-C(8A)  | -10.9(18)  |
| C(11A)-C(12A)-C(13A)-C(14A) | -133.9(14) |
| C(11A)-C(12A)-C(15A)-O(4A)  | 136.5(14)  |
| C(11A)-C(12A)-C(15A)-O(5A)  | -49(2)     |
| C(11A)-C(16A)-C(17A)-C(18A) | -2(2)      |
| C(11A)-C(16A)-C(17A)-C(19A) | 160.0(14)  |
| C(11A)-C(16A)-C(21A)-C(20A) | -138.1(17) |
| C(11A)-C(16A)-C(21A)-O(6A)  | 47(3)      |
| C(12A)-C(11A)-C(16A)-C(17A) | -111.6(15) |
| C(12A)-C(11A)-C(16A)-C(21A) | 8(2)       |
| C(12A)-C(11A)-C(16A)-C(34A) | 128.6(15)  |
| C(12A)-C(13A)-C(14A)-O(3A)  | -168(2)    |
| C(12A)-C(13A)-C(14A)-O(4A)  | 12.5(18)   |
| C(12A)-C(15A)-O(4A)-C(14A)  | -10.0(18)  |
| C(13A)-C(8A)-C(9A)-C(10A)   | 55.7(17)   |
| C(13A)-C(8A)-C(9A)-C(22A)   | -127.1(14) |
| C(13A)-C(12A)-C(15A)-O(4A)  | 16.7(18)   |
| C(13A)-C(12A)-C(15A)-O(5A)  | -169.0(18) |
| C(13A)-C(14A)-O(4A)-C(15A)  | -1.6(18)   |
| C(15A)-C(12A)-C(13A)-C(8A)  | 106.1(14)  |
| C(15A)-C(12A)-C(13A)-C(14A) | -16.8(17)  |

---

|                             |            |
|-----------------------------|------------|
| C(16A)-C(11A)-C(12A)-C(13A) | 173.3(13)  |
| C(16A)-C(11A)-C(12A)-C(15A) | 61.7(19)   |
| C(16A)-C(17A)-C(18A)-C(10A) | -2(2)      |
| C(16A)-C(17A)-C(18A)-C(28A) | 175.7(14)  |
| C(16A)-C(17A)-C(19A)-C(20A) | -29.2(19)  |
| C(17A)-C(16A)-C(21A)-C(20A) | -20.0(19)  |
| C(17A)-C(16A)-C(21A)-O(6A)  | 166(2)     |
| C(17A)-C(18A)-C(28A)-C(29A) | -105.6(15) |
| C(17A)-C(18A)-C(28A)-C(33A) | 73.1(17)   |
| C(17A)-C(19A)-C(20A)-C(21A) | 17(2)      |
| C(18A)-C(10A)-C(11A)-C(12A) | 121.0(13)  |
| C(18A)-C(10A)-C(11A)-C(16A) | -5.8(17)   |
| C(18A)-C(17A)-C(19A)-C(20A) | 127(2)     |
| C(18A)-C(28A)-C(29A)-C(30A) | 178.7(12)  |
| C(18A)-C(28A)-C(33A)-C(32A) | -178.7(12) |
| C(19A)-C(17A)-C(18A)-C(10A) | -156.5(19) |
| C(19A)-C(17A)-C(18A)-C(28A) | 21(3)      |
| C(19A)-C(20A)-C(21A)-C(16A) | 1(2)       |
| C(19A)-C(20A)-C(21A)-O(6A)  | 176(2)     |
| C(21A)-C(16A)-C(17A)-C(18A) | -130.6(16) |
| C(21A)-C(16A)-C(17A)-C(19A) | 31.3(18)   |
| C(22A)-C(9A)-C(10A)-C(11A)  | 175.9(14)  |
| C(22A)-C(9A)-C(10A)-C(18A)  | 9(3)       |
| C(22A)-C(23A)-C(24A)-C(25A) | 0.0        |
| C(23A)-C(22A)-C(27A)-C(26A) | 0.0        |
| C(23A)-C(24A)-C(25A)-C(26A) | 0.0        |
| C(24A)-C(25A)-C(26A)-C(27A) | 0.0        |
| C(25A)-C(26A)-C(27A)-C(22A) | 0.0        |
| C(27A)-C(22A)-C(23A)-C(24A) | 0.0        |
| C(28A)-C(29A)-C(30A)-C(31A) | 0.0        |
| C(29A)-C(28A)-C(33A)-C(32A) | 0.0        |
| C(29A)-C(30A)-C(31A)-C(32A) | 0.0        |
| C(30A)-C(31A)-C(32A)-C(33A) | 0.0        |
| C(31A)-C(32A)-C(33A)-C(28A) | 0.0        |
| C(33A)-C(28A)-C(29A)-C(30A) | 0.0        |
| C(34A)-C(16A)-C(17A)-C(18A) | 114.9(17)  |



---

|                             |           |
|-----------------------------|-----------|
| C(34A)-C(16A)-C(17A)-C(19A) | -83.2(18) |
| C(34A)-C(16A)-C(21A)-C(20A) | 99.7(17)  |
| C(34A)-C(16A)-C(21A)-O(6A)  | -75(3)    |
| O(1A)-C(1A)-C(2A)-C(3A)     | -157(2)   |
| O(1A)-C(1A)-C(5A)-C(4A)     | 157.6(19) |
| O(1A)-C(1A)-C(5A)-C(6A)     | 40(2)     |
| O(1A)-C(1A)-C(5A)-C(7A)     | -89(2)    |
| O(2A)-C(4A)-C(5A)-C(1A)     | -162(2)   |
| O(2A)-C(4A)-C(5A)-C(6A)     | -44(3)    |
| O(2A)-C(4A)-C(5A)-C(7A)     | 78(2)     |
| O(3A)-C(14A)-O(4A)-C(15A)   | 179.2(18) |
| O(5A)-C(15A)-O(4A)-C(14A)   | 175.4(17) |

---

### 7.3 Compound 9

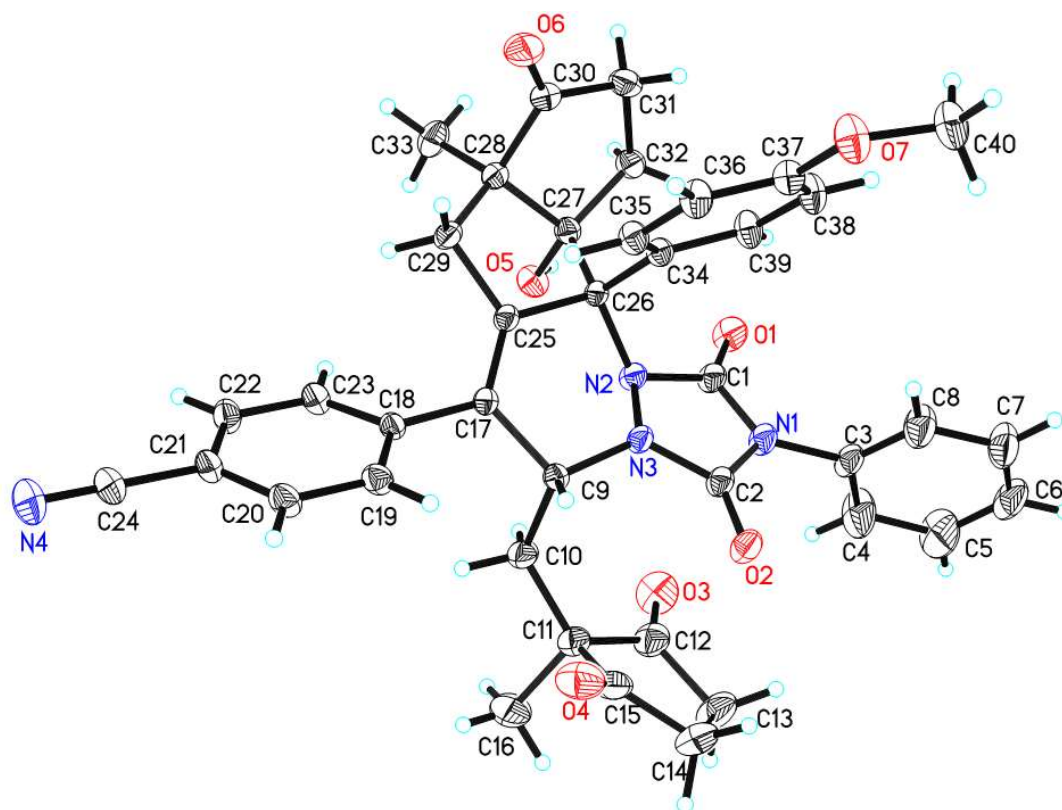

Table 14. Crystal data and structure refinement for **9**.

|                                   |                                             |                 |
|-----------------------------------|---------------------------------------------|-----------------|
| Identification code               | mo_191205a_0m                               |                 |
| Empirical formula                 | C41 H37 Cl3 N4 O7                           |                 |
| Formula weight                    | 804.09                                      |                 |
| Temperature                       | 296(2) K                                    |                 |
| Wavelength                        | 0.71073 Å                                   |                 |
| Crystal system                    | Monoclinic                                  |                 |
| Space group                       | P 1 21 1                                    |                 |
| Unit cell dimensions              | a = 13.3144(9) Å                            | a = 90°.        |
|                                   | b = 9.8595(7) Å                             | b = 95.339(2)°. |
|                                   | c = 14.5355(10) Å                           | g = 90°.        |
| Volume                            | 1899.8(2) Å <sup>3</sup>                    |                 |
| Z                                 | 2                                           |                 |
| Density (calculated)              | 1.406 Mg/m <sup>3</sup>                     |                 |
| Absorption coefficient            | 0.298 mm <sup>-1</sup>                      |                 |
| F(000)                            | 836                                         |                 |
| Crystal size                      | 0.15 x 0.12 x 0.1 mm <sup>3</sup>           |                 |
| Theta range for data collection   | 1.536 to 30.692°.                           |                 |
| Index ranges                      | -18<=h<=18, -14<=k<=14, -17<=l<=20          |                 |
| Reflections collected             | 33634                                       |                 |
| Independent reflections           | 10874 [R(int) = 0.0362]                     |                 |
| Completeness to theta = 25.242°   | 99.9 %                                      |                 |
| Absorption correction             | Semi-empirical from equivalents             |                 |
| Max. and min. transmission        | 0.7461 and 0.5746                           |                 |
| Refinement method                 | Full-matrix least-squares on F <sup>2</sup> |                 |
| Data / restraints / parameters    | 10874 / 31 / 525                            |                 |
| Goodness-of-fit on F <sup>2</sup> | 1.068                                       |                 |
| Final R indices [I>2sigma(I)]     | R1 = 0.0644, wR2 = 0.1816                   |                 |
| R indices (all data)              | R1 = 0.0776, wR2 = 0.2025                   |                 |
| Absolute structure parameter      | -0.03(3)                                    |                 |
| Extinction coefficient            | n/a                                         |                 |
| Largest diff. peak and hole       | 0.361 and -0.708 e.Å <sup>-3</sup>          |                 |

Table 15. Atomic coordinates ( $\times 10^4$ ) and equivalent isotropic displacement parameters ( $\text{\AA}^2 \times 10^3$ ) for **9**. U(eq) is defined as one third of the trace of the orthogonalized  $U_{ij}$  tensor.

|       | x        | y       | z       | U(eq) |
|-------|----------|---------|---------|-------|
| C(1)  | 7918(2)  | 8341(4) | 7596(2) | 36(1) |
| C(2)  | 8088(2)  | 7011(3) | 6331(2) | 34(1) |
| C(3)  | 9633(2)  | 7450(4) | 7385(3) | 43(1) |
| C(4)  | 10288(4) | 8434(7) | 7167(5) | 81(2) |
| C(5)  | 11319(4) | 8263(9) | 7412(5) | 92(2) |
| C(6)  | 11647(3) | 7129(7) | 7899(4) | 69(1) |
| C(7)  | 10990(4) | 6174(7) | 8119(4) | 73(1) |
| C(8)  | 9961(3)  | 6312(6) | 7841(4) | 63(1) |
| C(9)  | 6349(2)  | 7419(3) | 5557(2) | 28(1) |
| C(10) | 6563(3)  | 8554(4) | 4879(2) | 40(1) |
| C(11) | 7487(3)  | 8472(4) | 4327(3) | 44(1) |
| C(12) | 8489(3)  | 8916(5) | 4839(3) | 51(1) |
| C(13) | 9343(4)  | 8224(6) | 4399(4) | 70(1) |
| C(14) | 8880(4)  | 7053(7) | 3846(4) | 69(1) |
| C(15) | 7745(3)  | 7119(5) | 3911(3) | 51(1) |
| C(16) | 7308(5)  | 9473(6) | 3499(4) | 72(2) |
| C(17) | 5312(2)  | 7616(3) | 5911(2) | 27(1) |
| C(18) | 4436(2)  | 7653(3) | 5192(2) | 28(1) |
| C(19) | 4339(3)  | 6722(3) | 4472(2) | 35(1) |
| C(20) | 3498(3)  | 6707(4) | 3830(2) | 39(1) |
| C(21) | 2740(2)  | 7655(4) | 3900(2) | 38(1) |
| C(22) | 2835(3)  | 8637(4) | 4594(2) | 40(1) |
| C(23) | 3678(2)  | 8633(3) | 5221(2) | 34(1) |
| C(24) | 1853(3)  | 7656(6) | 3248(3) | 54(1) |
| C(25) | 5204(2)  | 7721(3) | 6820(2) | 28(1) |
| C(26) | 6084(2)  | 7713(3) | 7569(2) | 27(1) |
| C(27) | 5708(2)  | 8758(3) | 8277(2) | 30(1) |
| C(28) | 4579(2)  | 8361(3) | 8265(2) | 32(1) |
| C(29) | 4241(2)  | 7847(4) | 7292(2) | 37(1) |
| C(30) | 4597(3)  | 7302(4) | 9031(2) | 39(1) |
| C(31) | 5472(3)  | 7599(5) | 9745(2) | 48(1) |

---

|        |          |          |          |        |
|--------|----------|----------|----------|--------|
| C(32)  | 6114(3)  | 8678(4)  | 9307(2)  | 38(1)  |
| C(33)  | 3927(3)  | 9537(4)  | 8569(3)  | 48(1)  |
| C(34)  | 6283(2)  | 6268(3)  | 7945(2)  | 29(1)  |
| C(35)  | 5691(2)  | 5168(3)  | 7621(2)  | 35(1)  |
| C(36)  | 5882(3)  | 3855(3)  | 7945(3)  | 39(1)  |
| C(37)  | 6698(3)  | 3607(3)  | 8579(2)  | 37(1)  |
| C(38)  | 7302(3)  | 4681(4)  | 8909(3)  | 42(1)  |
| C(39)  | 7094(3)  | 5986(3)  | 8600(2)  | 39(1)  |
| C(40)  | 7738(4)  | 1972(5)  | 9428(4)  | 57(1)  |
| N(1)   | 8574(2)  | 7611(3)  | 7120(2)  | 38(1)  |
| N(2)   | 6968(2)  | 8210(3)  | 7109(2)  | 32(1)  |
| N(3)   | 7097(2)  | 7332(3)  | 6351(2)  | 31(1)  |
| N(4)   | 1151(3)  | 7677(7)  | 2736(3)  | 79(2)  |
| O(1)   | 8109(2)  | 8968(3)  | 8303(2)  | 49(1)  |
| O(2)   | 8463(2)  | 6381(3)  | 5738(2)  | 43(1)  |
| O(3)   | 8571(3)  | 9713(4)  | 5465(3)  | 69(1)  |
| O(4)   | 7150(3)  | 6261(4)  | 3651(2)  | 65(1)  |
| O(5)   | 5799(2)  | 10066(2) | 7897(2)  | 41(1)  |
| O(6)   | 4002(2)  | 6390(4)  | 9067(2)  | 56(1)  |
| O(7)   | 6849(2)  | 2284(3)  | 8847(2)  | 53(1)  |
| C(41)  | 9263(8)  | 6981(13) | 1020(8)  | 148(5) |
| Cl(1)  | 9447(5)  | 7968(11) | 115(4)   | 222(4) |
| Cl(2)  | 8050(5)  | 7046(11) | 1280(5)  | 168(4) |
| Cl(3)  | 9630(5)  | 5461(9)  | 650(7)   | 243(4) |
| C(41A) | 9390(20) | 7080(40) | 1120(12) | 148(5) |
| Cl(1A) | 8146(15) | 7550(30) | 1054(17) | 136(8) |
| Cl(2A) | 9718(19) | 5800(30) | 1890(20) | 243(4) |
| Cl(3A) | 9601(9)  | 6580(20) | 30(8)    | 116(5) |

---

---

Table 16. Bond lengths [Å] and angles [°] for **9**.

---

|             |           |
|-------------|-----------|
| C(1)-N(1)   | 1.369(4)  |
| C(1)-N(2)   | 1.398(4)  |
| C(1)-O(1)   | 1.205(4)  |
| C(2)-N(1)   | 1.395(4)  |
| C(2)-N(3)   | 1.360(4)  |
| C(2)-O(2)   | 1.208(4)  |
| C(3)-C(4)   | 1.362(6)  |
| C(3)-C(8)   | 1.355(7)  |
| C(3)-N(1)   | 1.435(4)  |
| C(4)-C(5)   | 1.395(7)  |
| C(5)-C(6)   | 1.373(10) |
| C(6)-C(7)   | 1.344(9)  |
| C(7)-C(8)   | 1.399(6)  |
| C(9)-C(10)  | 1.536(4)  |
| C(9)-C(17)  | 1.531(4)  |
| C(9)-N(3)   | 1.455(3)  |
| C(10)-C(11) | 1.532(5)  |
| C(11)-C(12) | 1.530(6)  |
| C(11)-C(15) | 1.517(6)  |
| C(11)-C(16) | 1.557(6)  |
| C(12)-C(13) | 1.518(6)  |
| C(12)-O(3)  | 1.200(6)  |
| C(13)-C(14) | 1.505(9)  |
| C(14)-C(15) | 1.523(6)  |
| C(15)-O(4)  | 1.196(6)  |
| C(17)-C(18) | 1.492(3)  |
| C(17)-C(25) | 1.346(4)  |
| C(18)-C(19) | 1.389(4)  |
| C(18)-C(23) | 1.400(4)  |
| C(19)-C(20) | 1.389(5)  |
| C(20)-C(21) | 1.387(5)  |
| C(21)-C(22) | 1.395(5)  |
| C(21)-C(24) | 1.443(4)  |
| C(22)-C(23) | 1.378(4)  |

---

|                |           |
|----------------|-----------|
| C(24)-N(4)     | 1.140(5)  |
| C(25)-C(26)    | 1.523(3)  |
| C(25)-C(29)    | 1.515(4)  |
| C(26)-C(27)    | 1.572(4)  |
| C(26)-C(34)    | 1.540(4)  |
| C(26)-N(2)     | 1.490(3)  |
| C(27)-C(28)    | 1.551(4)  |
| C(27)-C(32)    | 1.545(4)  |
| C(27)-O(5)     | 1.413(4)  |
| C(28)-C(29)    | 1.530(4)  |
| C(28)-C(30)    | 1.525(4)  |
| C(28)-C(33)    | 1.538(5)  |
| C(30)-C(31)    | 1.515(5)  |
| C(30)-O(6)     | 1.203(5)  |
| C(31)-C(32)    | 1.539(5)  |
| C(34)-C(35)    | 1.397(4)  |
| C(34)-C(39)    | 1.399(4)  |
| C(35)-C(36)    | 1.393(5)  |
| C(36)-C(37)    | 1.380(5)  |
| C(37)-C(38)    | 1.388(5)  |
| C(37)-O(7)     | 1.371(4)  |
| C(38)-C(39)    | 1.382(5)  |
| C(40)-O(7)     | 1.422(5)  |
| N(2)-N(3)      | 1.424(3)  |
| C(41)-Cl(1)    | 1.673(10) |
| C(41)-Cl(2)    | 1.694(10) |
| C(41)-Cl(3)    | 1.680(10) |
| C(41A)-Cl(1A)  | 1.713(13) |
| C(41A)-Cl(2A)  | 1.723(13) |
| C(41A)-Cl(3A)  | 1.709(13) |
| <br>           |           |
| N(1)-C(1)-N(2) | 106.6(3)  |
| O(1)-C(1)-N(1) | 127.4(3)  |
| O(1)-C(1)-N(2) | 126.0(3)  |
| N(3)-C(2)-N(1) | 105.1(3)  |
| O(2)-C(2)-N(1) | 127.9(3)  |

---

|                   |          |
|-------------------|----------|
| O(2)-C(2)-N(3)    | 127.0(3) |
| C(4)-C(3)-N(1)    | 119.6(4) |
| C(8)-C(3)-C(4)    | 121.3(4) |
| C(8)-C(3)-N(1)    | 119.1(3) |
| C(3)-C(4)-C(5)    | 119.4(6) |
| C(6)-C(5)-C(4)    | 119.3(6) |
| C(7)-C(6)-C(5)    | 120.7(4) |
| C(6)-C(7)-C(8)    | 120.3(6) |
| C(3)-C(8)-C(7)    | 119.0(5) |
| C(17)-C(9)-C(10)  | 110.5(2) |
| N(3)-C(9)-C(10)   | 113.5(2) |
| N(3)-C(9)-C(17)   | 108.3(2) |
| C(11)-C(10)-C(9)  | 120.2(3) |
| C(10)-C(11)-C(16) | 107.3(3) |
| C(12)-C(11)-C(10) | 115.9(3) |
| C(12)-C(11)-C(16) | 105.0(4) |
| C(15)-C(11)-C(10) | 118.6(3) |
| C(15)-C(11)-C(12) | 103.1(3) |
| C(15)-C(11)-C(16) | 105.9(4) |
| C(13)-C(12)-C(11) | 108.6(4) |
| O(3)-C(12)-C(11)  | 124.8(4) |
| O(3)-C(12)-C(13)  | 126.5(4) |
| C(14)-C(13)-C(12) | 106.5(4) |
| C(13)-C(14)-C(15) | 107.1(4) |
| C(11)-C(15)-C(14) | 108.9(4) |
| O(4)-C(15)-C(11)  | 125.4(4) |
| O(4)-C(15)-C(14)  | 125.6(5) |
| C(18)-C(17)-C(9)  | 116.0(2) |
| C(25)-C(17)-C(9)  | 121.4(2) |
| C(25)-C(17)-C(18) | 122.6(2) |
| C(19)-C(18)-C(17) | 121.6(3) |
| C(19)-C(18)-C(23) | 117.5(3) |
| C(23)-C(18)-C(17) | 120.9(2) |
| C(18)-C(19)-C(20) | 121.7(3) |
| C(21)-C(20)-C(19) | 119.4(3) |
| C(20)-C(21)-C(22) | 120.2(3) |



---

|                   |          |
|-------------------|----------|
| C(20)-C(21)-C(24) | 120.6(3) |
| C(22)-C(21)-C(24) | 119.2(3) |
| C(23)-C(22)-C(21) | 119.3(3) |
| C(22)-C(23)-C(18) | 121.8(3) |
| N(4)-C(24)-C(21)  | 178.9(6) |
| C(17)-C(25)-C(26) | 123.8(2) |
| C(17)-C(25)-C(29) | 128.6(2) |
| C(29)-C(25)-C(26) | 107.7(2) |
| C(25)-C(26)-C(27) | 101.2(2) |
| C(25)-C(26)-C(34) | 110.8(2) |
| C(34)-C(26)-C(27) | 115.4(2) |
| N(2)-C(26)-C(25)  | 105.4(2) |
| N(2)-C(26)-C(27)  | 113.0(2) |
| N(2)-C(26)-C(34)  | 110.3(2) |
| C(28)-C(27)-C(26) | 101.2(2) |
| C(32)-C(27)-C(26) | 119.8(2) |
| C(32)-C(27)-C(28) | 104.5(2) |
| O(5)-C(27)-C(26)  | 107.3(2) |
| O(5)-C(27)-C(28)  | 110.2(2) |
| O(5)-C(27)-C(32)  | 113.0(3) |
| C(29)-C(28)-C(27) | 107.2(2) |
| C(29)-C(28)-C(33) | 112.9(3) |
| C(30)-C(28)-C(27) | 102.4(2) |
| C(30)-C(28)-C(29) | 115.6(3) |
| C(30)-C(28)-C(33) | 106.1(3) |
| C(33)-C(28)-C(27) | 112.3(3) |
| C(25)-C(29)-C(28) | 104.9(2) |
| C(31)-C(30)-C(28) | 109.0(3) |
| O(6)-C(30)-C(28)  | 125.3(3) |
| O(6)-C(30)-C(31)  | 125.7(3) |
| C(30)-C(31)-C(32) | 105.8(3) |
| C(31)-C(32)-C(27) | 106.1(3) |
| C(35)-C(34)-C(26) | 121.7(3) |
| C(35)-C(34)-C(39) | 116.8(3) |
| C(39)-C(34)-C(26) | 121.5(3) |
| C(36)-C(35)-C(34) | 121.9(3) |

---

|                      |           |
|----------------------|-----------|
| C(37)-C(36)-C(35)    | 119.9(3)  |
| C(36)-C(37)-C(38)    | 119.4(3)  |
| O(7)-C(37)-C(36)     | 116.4(3)  |
| O(7)-C(37)-C(38)     | 124.2(3)  |
| C(39)-C(38)-C(37)    | 120.4(3)  |
| C(38)-C(39)-C(34)    | 121.7(3)  |
| C(1)-N(1)-C(2)       | 111.7(2)  |
| C(1)-N(1)-C(3)       | 125.4(3)  |
| C(2)-N(1)-C(3)       | 122.9(3)  |
| C(1)-N(2)-C(26)      | 121.2(2)  |
| C(1)-N(2)-N(3)       | 106.2(2)  |
| N(3)-N(2)-C(26)      | 107.7(2)  |
| C(2)-N(3)-C(9)       | 126.2(2)  |
| C(2)-N(3)-N(2)       | 110.2(2)  |
| N(2)-N(3)-C(9)       | 117.0(2)  |
| C(37)-O(7)-C(40)     | 117.8(3)  |
| Cl(1)-C(41)-Cl(2)    | 111.5(7)  |
| Cl(1)-C(41)-Cl(3)    | 101.4(8)  |
| Cl(3)-C(41)-Cl(2)    | 114.7(9)  |
| Cl(1A)-C(41A)-Cl(2A) | 114.7(19) |
| Cl(3A)-C(41A)-Cl(1A) | 105.5(17) |
| Cl(3A)-C(41A)-Cl(2A) | 109.5(19) |

---

Symmetry transformations used to generate equivalent atoms:

Table 17. Anisotropic displacement parameters ( $\text{\AA}^2 \times 10^3$ ) for **9**. The anisotropic displacement factor exponent takes the form:  $-2p^2 [ h^2 a^{*2} U^{11} + \dots + 2 h k a^* b^* U^{12} ]$

|       | U <sup>11</sup> | U <sup>22</sup> | U <sup>33</sup> | U <sup>23</sup> | U <sup>13</sup> | U <sup>12</sup> |
|-------|-----------------|-----------------|-----------------|-----------------|-----------------|-----------------|
| C(1)  | 25(1)           | 45(2)           | 38(1)           | -4(1)           | 1(1)            | -8(1)           |
| C(2)  | 24(1)           | 38(1)           | 38(1)           | -1(1)           | 2(1)            | -4(1)           |
| C(3)  | 23(1)           | 60(2)           | 45(2)           | -10(2)          | 0(1)            | -2(1)           |
| C(4)  | 35(2)           | 86(4)           | 118(5)          | 28(4)           | -13(2)          | -17(2)          |
| C(5)  | 33(2)           | 125(6)          | 116(5)          | 16(4)           | -9(2)           | -26(3)          |
| C(6)  | 28(2)           | 107(4)          | 71(3)           | -19(3)          | -2(2)           | 4(2)            |
| C(7)  | 45(2)           | 87(4)           | 83(3)           | 5(3)            | -8(2)           | 17(2)           |
| C(8)  | 37(2)           | 65(3)           | 86(3)           | 9(2)            | -1(2)           | 1(2)            |
| C(9)  | 26(1)           | 33(1)           | 25(1)           | 0(1)            | 0(1)            | -1(1)           |
| C(10) | 37(2)           | 43(2)           | 43(2)           | 12(1)           | 12(1)           | 4(1)            |
| C(11) | 39(2)           | 51(2)           | 43(2)           | 8(2)            | 12(1)           | 1(1)            |
| C(12) | 44(2)           | 52(2)           | 59(2)           | 8(2)            | 13(2)           | -7(2)           |
| C(13) | 42(2)           | 88(4)           | 83(3)           | 4(3)            | 25(2)           | -5(2)           |
| C(14) | 63(3)           | 86(3)           | 61(3)           | -4(2)           | 29(2)           | 12(3)           |
| C(15) | 58(2)           | 61(2)           | 37(2)           | 4(2)            | 17(2)           | 1(2)            |
| C(16) | 77(3)           | 82(4)           | 61(3)           | 38(3)           | 22(2)           | 9(3)            |
| C(17) | 23(1)           | 31(1)           | 28(1)           | 0(1)            | 0(1)            | -1(1)           |
| C(18) | 26(1)           | 31(1)           | 25(1)           | 2(1)            | -1(1)           | -2(1)           |
| C(19) | 41(2)           | 36(1)           | 29(1)           | -3(1)           | 2(1)            | 6(1)            |
| C(20) | 44(2)           | 43(2)           | 28(1)           | -5(1)           | -3(1)           | 0(1)            |
| C(21) | 34(1)           | 49(2)           | 29(1)           | 3(1)            | -6(1)           | 0(1)            |
| C(22) | 37(2)           | 43(2)           | 38(2)           | 0(1)            | -3(1)           | 9(1)            |
| C(23) | 39(2)           | 32(1)           | 31(1)           | -2(1)           | -3(1)           | 4(1)            |
| C(24) | 43(2)           | 82(3)           | 34(2)           | -1(2)           | -7(1)           | 2(2)            |
| C(25) | 22(1)           | 34(1)           | 28(1)           | -2(1)           | 1(1)            | -2(1)           |
| C(26) | 21(1)           | 34(1)           | 25(1)           | 0(1)            | 0(1)            | -3(1)           |
| C(27) | 30(1)           | 32(1)           | 29(1)           | -1(1)           | 1(1)            | -1(1)           |
| C(28) | 28(1)           | 38(1)           | 31(1)           | -1(1)           | 5(1)            | 2(1)            |
| C(29) | 24(1)           | 56(2)           | 31(1)           | -5(1)           | 4(1)            | -2(1)           |
| C(30) | 36(1)           | 48(2)           | 35(1)           | 3(1)            | 8(1)            | 0(1)            |
| C(31) | 44(2)           | 69(2)           | 31(1)           | 8(2)            | 2(1)            | -7(2)           |

---

|        |        |         |        |        |        |        |
|--------|--------|---------|--------|--------|--------|--------|
| C(32)  | 37(2)  | 48(2)   | 29(1)  | -5(1)  | -2(1)  | -4(1)  |
| C(33)  | 38(2)  | 48(2)   | 58(2)  | -12(2) | 8(2)   | 8(1)   |
| C(34)  | 26(1)  | 33(1)   | 28(1)  | -3(1)  | -1(1)  | -2(1)  |
| C(35)  | 32(1)  | 37(2)   | 35(1)  | -3(1)  | -4(1)  | -5(1)  |
| C(36)  | 36(2)  | 35(2)   | 45(2)  | -6(1)  | -6(1)  | -6(1)  |
| C(37)  | 37(1)  | 34(1)   | 39(2)  | -1(1)  | 1(1)   | -1(1)  |
| C(38)  | 38(2)  | 36(2)   | 50(2)  | -1(1)  | -12(1) | 1(1)   |
| C(39)  | 35(2)  | 34(2)   | 45(2)  | -2(1)  | -12(1) | -4(1)  |
| C(40)  | 57(2)  | 43(2)   | 69(3)  | 8(2)   | -12(2) | 6(2)   |
| N(1)   | 24(1)  | 49(2)   | 40(1)  | -6(1)  | -1(1)  | -4(1)  |
| N(2)   | 25(1)  | 40(1)   | 30(1)  | -6(1)  | 1(1)   | -5(1)  |
| N(3)   | 22(1)  | 42(1)   | 30(1)  | -5(1)  | 1(1)   | 0(1)   |
| N(4)   | 49(2)  | 133(5)  | 50(2)  | -5(3)  | -17(2) | -1(3)  |
| O(1)   | 39(1)  | 61(2)   | 46(1)  | -16(1) | -2(1)  | -12(1) |
| O(2)   | 30(1)  | 53(1)   | 46(1)  | -9(1)  | 5(1)   | 1(1)   |
| O(3)   | 66(2)  | 58(2)   | 82(2)  | -10(2) | 5(2)   | -15(2) |
| O(4)   | 78(2)  | 69(2)   | 50(2)  | -9(2)  | 13(2)  | -14(2) |
| O(5)   | 47(1)  | 33(1)   | 42(1)  | 3(1)   | 0(1)   | -5(1)  |
| O(6)   | 50(2)  | 59(2)   | 57(2)  | 13(1)  | 9(1)   | -14(1) |
| O(7)   | 54(2)  | 36(1)   | 66(2)  | 2(1)   | -15(1) | -2(1)  |
| C(41)  | 119(8) | 219(16) | 100(7) | -42(8) | -16(6) | -27(9) |
| Cl(1)  | 175(5) | 342(12) | 149(4) | 86(6)  | 20(3)  | 8(6)   |
| Cl(2)  | 106(3) | 296(10) | 99(3)  | -1(4)  | 0(2)   | -79(4) |
| Cl(3)  | 154(4) | 250(7)  | 307(9) | 10(8)  | -67(5) | -5(5)  |
| C(41A) | 119(8) | 219(16) | 100(7) | -42(8) | -16(6) | -27(9) |
| Cl(1A) | 89(11) | 210(20) | 98(13) | 17(13) | -39(9) | -7(14) |
| Cl(2A) | 154(4) | 250(7)  | 307(9) | 10(8)  | -67(5) | -5(5)  |
| Cl(3A) | 78(6)  | 191(14) | 74(5)  | -13(7) | -21(4) | -25(7) |

---

Table 18. Hydrogen coordinates ( $\times 10^4$ ) and isotropic displacement parameters ( $\text{\AA}^2 \times 10^3$ ) for **9**.

|        | x     | y     | z     | U(eq) |
|--------|-------|-------|-------|-------|
| H(4)   | 10052 | 9212  | 6857  | 97    |
| H(5)   | 11778 | 8910  | 7248  | 111   |
| H(6)   | 12331 | 7020  | 8078  | 83    |
| H(7)   | 11221 | 5418  | 8458  | 87    |
| H(8)   | 9509  | 5633  | 7968  | 76    |
| H(9)   | 6344  | 6553  | 5225  | 34    |
| H(10A) | 5974  | 8633  | 4436  | 49    |
| H(10B) | 6615  | 9395  | 5226  | 49    |
| H(13A) | 9659  | 8851  | 4000  | 83    |
| H(13B) | 9850  | 7901  | 4870  | 83    |
| H(14A) | 9148  | 6201  | 4095  | 82    |
| H(14B) | 9028  | 7123  | 3207  | 82    |
| H(16A) | 6763  | 9148  | 3078  | 109   |
| H(16B) | 7910  | 9535  | 3185  | 109   |
| H(16C) | 7142  | 10352 | 3724  | 109   |
| H(19)  | 4851  | 6093  | 4418  | 42    |
| H(20)  | 3444  | 6067  | 3358  | 47    |
| H(22)  | 2335  | 9287  | 4634  | 47    |
| H(23)  | 3746  | 9299  | 5675  | 41    |
| H(29A) | 3907  | 6975  | 7318  | 44    |
| H(29B) | 3781  | 8485  | 6967  | 44    |
| H(31A) | 5865  | 6785  | 9888  | 58    |
| H(31B) | 5230  | 7941  | 10310 | 58    |
| H(32A) | 6820  | 8417  | 9367  | 46    |
| H(32B) | 6050  | 9549  | 9606  | 46    |
| H(33A) | 4147  | 9787  | 9193  | 72    |
| H(33B) | 3233  | 9257  | 8533  | 72    |
| H(33C) | 3992  | 10302 | 8169  | 72    |
| H(35)  | 5153  | 5317  | 7177  | 42    |
| H(36)  | 5461  | 3147  | 7733  | 47    |

---

|        |      |       |       |     |
|--------|------|-------|-------|-----|
| H(38)  | 7850 | 4522  | 9339  | 51  |
| H(39)  | 7503 | 6694  | 8833  | 47  |
| H(40A) | 8320 | 2235  | 9127  | 86  |
| H(40B) | 7763 | 1014  | 9548  | 86  |
| H(40C) | 7732 | 2455  | 10001 | 86  |
| H(5A)  | 6043 | 10585 | 8299  | 61  |
| H(41)  | 9713 | 7266  | 1558  | 177 |
| H(41A) | 9809 | 7881  | 1287  | 177 |

---

—

Table 19. Torsion angles [°] for **9**.

|                         |           |
|-------------------------|-----------|
| C(1)-N(2)-N(3)-C(2)     | -4.1(3)   |
| C(1)-N(2)-N(3)-C(9)     | -157.5(3) |
| C(3)-C(4)-C(5)-C(6)     | -2.4(12)  |
| C(4)-C(3)-C(8)-C(7)     | 2.2(9)    |
| C(4)-C(3)-N(1)-C(1)     | -82.7(6)  |
| C(4)-C(3)-N(1)-C(2)     | 98.0(6)   |
| C(4)-C(5)-C(6)-C(7)     | 1.6(11)   |
| C(5)-C(6)-C(7)-C(8)     | 1.1(10)   |
| C(6)-C(7)-C(8)-C(3)     | -3.0(9)   |
| C(8)-C(3)-C(4)-C(5)     | 0.5(10)   |
| C(8)-C(3)-N(1)-C(1)     | 97.9(5)   |
| C(8)-C(3)-N(1)-C(2)     | -81.4(5)  |
| C(9)-C(10)-C(11)-C(12)  | -81.3(4)  |
| C(9)-C(10)-C(11)-C(15)  | 42.1(5)   |
| C(9)-C(10)-C(11)-C(16)  | 161.9(4)  |
| C(9)-C(17)-C(18)-C(19)  | 44.8(4)   |
| C(9)-C(17)-C(18)-C(23)  | -135.3(3) |
| C(9)-C(17)-C(25)-C(26)  | 2.6(4)    |
| C(9)-C(17)-C(25)-C(29)  | -176.7(3) |
| C(10)-C(9)-C(17)-C(18)  | 58.3(3)   |
| C(10)-C(9)-C(17)-C(25)  | -123.0(3) |
| C(10)-C(9)-N(3)-C(2)    | -64.6(4)  |
| C(10)-C(9)-N(3)-N(2)    | 84.0(3)   |
| C(10)-C(11)-C(12)-C(13) | 155.3(4)  |
| C(10)-C(11)-C(12)-O(3)  | -26.8(6)  |
| C(10)-C(11)-C(15)-C(14) | -151.3(4) |
| C(10)-C(11)-C(15)-O(4)  | 30.7(6)   |
| C(11)-C(12)-C(13)-C(14) | -17.7(6)  |
| C(12)-C(11)-C(15)-C(14) | -21.7(4)  |
| C(12)-C(11)-C(15)-O(4)  | 160.3(4)  |
| C(12)-C(13)-C(14)-C(15) | 3.7(6)    |
| C(13)-C(14)-C(15)-C(11) | 11.6(5)   |
| C(13)-C(14)-C(15)-O(4)  | -170.4(5) |
| C(15)-C(11)-C(12)-C(13) | 24.2(4)   |

---

|                         |           |
|-------------------------|-----------|
| C(15)-C(11)-C(12)-O(3)  | -157.9(4) |
| C(16)-C(11)-C(12)-C(13) | -86.5(5)  |
| C(16)-C(11)-C(12)-O(3)  | 91.4(5)   |
| C(16)-C(11)-C(15)-C(14) | 88.2(4)   |
| C(16)-C(11)-C(15)-O(4)  | -89.7(5)  |
| C(17)-C(9)-C(10)-C(11)  | -171.4(3) |
| C(17)-C(9)-N(3)-C(2)    | 172.4(3)  |
| C(17)-C(9)-N(3)-N(2)    | -39.0(3)  |
| C(17)-C(18)-C(19)-C(20) | 176.4(3)  |
| C(17)-C(18)-C(23)-C(22) | -176.2(3) |
| C(17)-C(25)-C(26)-C(27) | 143.4(3)  |
| C(17)-C(25)-C(26)-C(34) | -93.7(3)  |
| C(17)-C(25)-C(26)-N(2)  | 25.5(4)   |
| C(17)-C(25)-C(29)-C(28) | -163.1(3) |
| C(18)-C(17)-C(25)-C(26) | -178.8(3) |
| C(18)-C(17)-C(25)-C(29) | 1.9(5)    |
| C(18)-C(19)-C(20)-C(21) | 0.9(5)    |
| C(19)-C(18)-C(23)-C(22) | 3.7(5)    |
| C(19)-C(20)-C(21)-C(22) | 1.7(5)    |
| C(19)-C(20)-C(21)-C(24) | -179.5(3) |
| C(20)-C(21)-C(22)-C(23) | -1.5(5)   |
| C(21)-C(22)-C(23)-C(18) | -1.2(5)   |
| C(23)-C(18)-C(19)-C(20) | -3.5(5)   |
| C(24)-C(21)-C(22)-C(23) | 179.6(3)  |
| C(25)-C(17)-C(18)-C(19) | -133.8(3) |
| C(25)-C(17)-C(18)-C(23) | 46.0(4)   |
| C(25)-C(26)-C(27)-C(28) | 41.2(3)   |
| C(25)-C(26)-C(27)-C(32) | 155.2(3)  |
| C(25)-C(26)-C(27)-O(5)  | -74.3(3)  |
| C(25)-C(26)-C(34)-C(35) | -1.2(4)   |
| C(25)-C(26)-C(34)-C(39) | 176.1(3)  |
| C(25)-C(26)-N(2)-C(1)   | 179.8(3)  |
| C(25)-C(26)-N(2)-N(3)   | -57.8(3)  |
| C(26)-C(25)-C(29)-C(28) | 17.6(3)   |
| C(26)-C(27)-C(28)-C(29) | -31.9(3)  |
| C(26)-C(27)-C(28)-C(30) | 90.2(3)   |



---

|                         |           |
|-------------------------|-----------|
| C(26)-C(27)-C(28)-C(33) | -156.4(3) |
| C(26)-C(27)-C(32)-C(31) | -83.3(3)  |
| C(26)-C(34)-C(35)-C(36) | 178.6(3)  |
| C(26)-C(34)-C(39)-C(38) | -177.1(3) |
| C(26)-N(2)-N(3)-C(2)    | -135.4(3) |
| C(26)-N(2)-N(3)-C(9)    | 71.2(3)   |
| C(27)-C(26)-C(34)-C(35) | 113.0(3)  |
| C(27)-C(26)-C(34)-C(39) | -69.7(4)  |
| C(27)-C(26)-N(2)-C(1)   | 70.1(4)   |
| C(27)-C(26)-N(2)-N(3)   | -167.4(2) |
| C(27)-C(28)-C(29)-C(25) | 9.7(3)    |
| C(27)-C(28)-C(30)-C(31) | 28.7(3)   |
| C(27)-C(28)-C(30)-O(6)  | -152.2(4) |
| C(28)-C(27)-C(32)-C(31) | 28.9(3)   |
| C(28)-C(30)-C(31)-C(32) | -11.2(4)  |
| C(29)-C(25)-C(26)-C(27) | -37.2(3)  |
| C(29)-C(25)-C(26)-C(34) | 85.7(3)   |
| C(29)-C(25)-C(26)-N(2)  | -155.1(3) |
| C(29)-C(28)-C(30)-C(31) | 144.9(3)  |
| C(29)-C(28)-C(30)-O(6)  | -36.0(5)  |
| C(30)-C(28)-C(29)-C(25) | -103.8(3) |
| C(30)-C(31)-C(32)-C(27) | -11.2(4)  |
| C(32)-C(27)-C(28)-C(29) | -156.9(3) |
| C(32)-C(27)-C(28)-C(30) | -34.8(3)  |
| C(32)-C(27)-C(28)-C(33) | 78.6(3)   |
| C(33)-C(28)-C(29)-C(25) | 133.8(3)  |
| C(33)-C(28)-C(30)-C(31) | -89.1(3)  |
| C(33)-C(28)-C(30)-O(6)  | 89.9(4)   |
| C(34)-C(26)-C(27)-C(28) | -78.4(3)  |
| C(34)-C(26)-C(27)-C(32) | 35.6(3)   |
| C(34)-C(26)-C(27)-O(5)  | 166.1(2)  |
| C(34)-C(26)-N(2)-C(1)   | -60.7(3)  |
| C(34)-C(26)-N(2)-N(3)   | 61.8(3)   |
| C(34)-C(35)-C(36)-C(37) | -2.3(5)   |
| C(35)-C(34)-C(39)-C(38) | 0.3(5)    |
| C(35)-C(36)-C(37)-C(38) | 1.9(5)    |

---

|                         |           |
|-------------------------|-----------|
| C(35)-C(36)-C(37)-O(7)  | -178.5(3) |
| C(36)-C(37)-C(38)-C(39) | -0.4(6)   |
| C(36)-C(37)-O(7)-C(40)  | 173.8(4)  |
| C(37)-C(38)-C(39)-C(34) | -0.7(6)   |
| C(38)-C(37)-O(7)-C(40)  | -6.6(6)   |
| C(39)-C(34)-C(35)-C(36) | 1.2(5)    |
| N(1)-C(1)-N(2)-C(26)    | 125.3(3)  |
| N(1)-C(1)-N(2)-N(3)     | 2.2(3)    |
| N(1)-C(2)-N(3)-C(9)     | 154.6(3)  |
| N(1)-C(2)-N(3)-N(2)     | 4.3(3)    |
| N(1)-C(3)-C(4)-C(5)     | -179.0(6) |
| N(1)-C(3)-C(8)-C(7)     | -178.4(5) |
| N(2)-C(1)-N(1)-C(2)     | 0.4(4)    |
| N(2)-C(1)-N(1)-C(3)     | -179.0(3) |
| N(2)-C(26)-C(27)-C(28)  | 153.4(2)  |
| N(2)-C(26)-C(27)-C(32)  | -92.6(3)  |
| N(2)-C(26)-C(27)-O(5)   | 37.9(3)   |
| N(2)-C(26)-C(34)-C(35)  | -117.4(3) |
| N(2)-C(26)-C(34)-C(39)  | 59.8(3)   |
| N(3)-C(2)-N(1)-C(1)     | -2.9(4)   |
| N(3)-C(2)-N(1)-C(3)     | 176.5(3)  |
| N(3)-C(9)-C(10)-C(11)   | 66.8(4)   |
| N(3)-C(9)-C(17)-C(18)   | -176.8(2) |
| N(3)-C(9)-C(17)-C(25)   | 1.9(4)    |
| O(1)-C(1)-N(1)-C(2)     | 179.7(4)  |
| O(1)-C(1)-N(1)-C(3)     | 0.3(6)    |
| O(1)-C(1)-N(2)-C(26)    | -54.0(5)  |
| O(1)-C(1)-N(2)-N(3)     | -177.1(4) |
| O(2)-C(2)-N(1)-C(1)     | 174.7(4)  |
| O(2)-C(2)-N(1)-C(3)     | -5.9(6)   |
| O(2)-C(2)-N(3)-C(9)     | -23.0(5)  |
| O(2)-C(2)-N(3)-N(2)     | -173.4(3) |
| O(3)-C(12)-C(13)-C(14)  | 164.4(5)  |
| O(5)-C(27)-C(28)-C(29)  | 81.5(3)   |
| O(5)-C(27)-C(28)-C(30)  | -156.5(2) |
| O(5)-C(27)-C(28)-C(33)  | -43.0(4)  |

---

|                        |          |
|------------------------|----------|
| O(5)-C(27)-C(32)-C(31) | 148.7(3) |
| O(6)-C(30)-C(31)-C(32) | 169.7(4) |
| O(7)-C(37)-C(38)-C(39) | 180.0(4) |

---

Symmetry transformations used to generate equivalent atoms:

---

Table 20. Hydrogen bonds for **9** [Å and °].

| D-H...A             | d(D-H) | d(H...A) | d(D...A) | <(DHA) |
|---------------------|--------|----------|----------|--------|
| O(5)-H(5A)...O(7)#1 | 0.82   | 2.11     | 2.878(4) | 156.9  |

Symmetry transformations used to generate equivalent atoms:

#1 x,y+1,z

# 10. Copies of the $^1\text{H}$ , $^{13}\text{C}$ and $^{19}\text{F}$ NMR spectra

## 3a

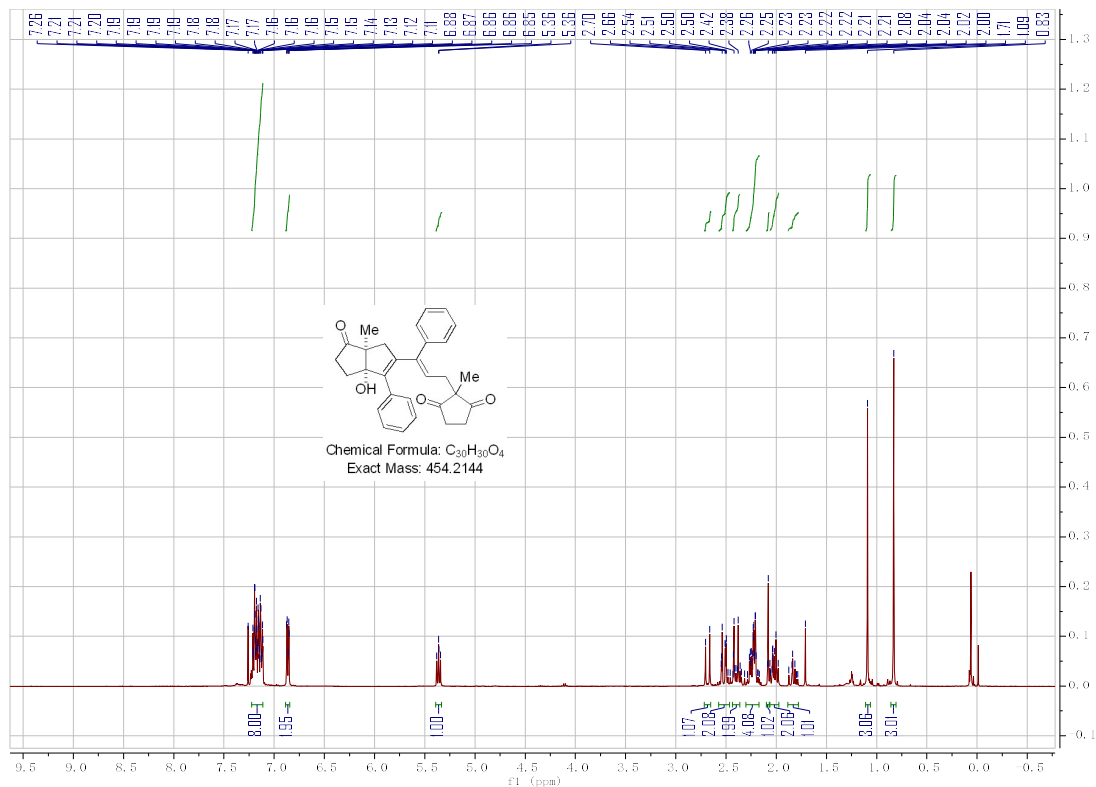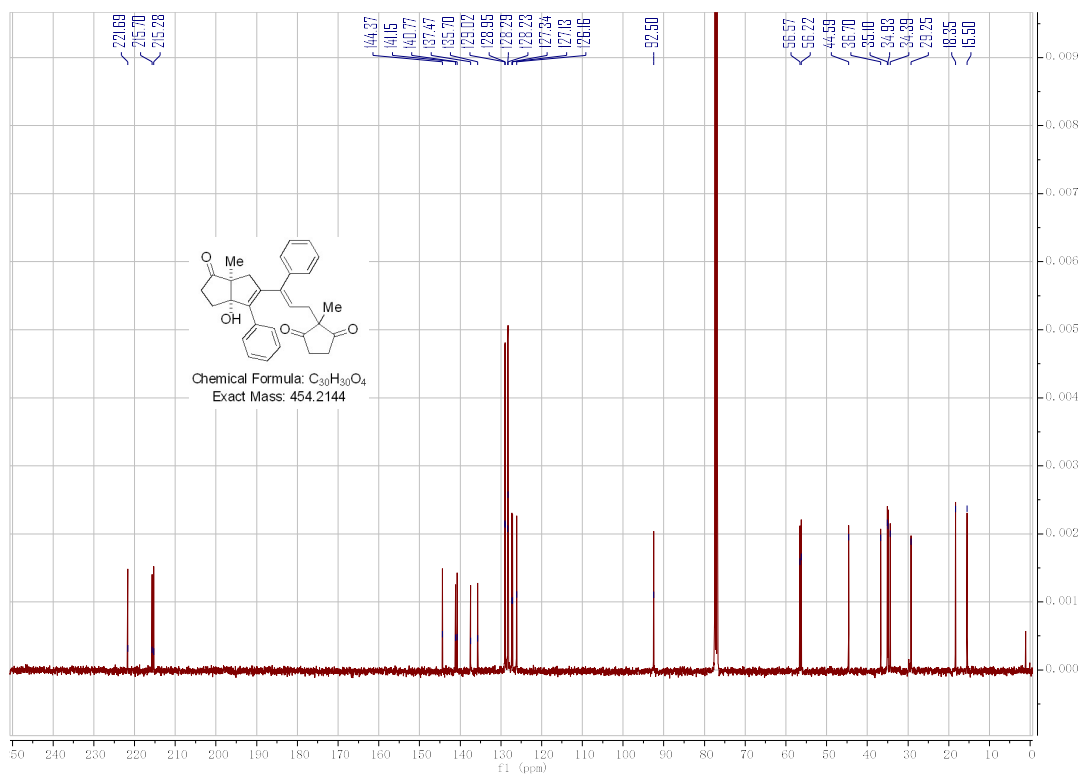

# 3a'

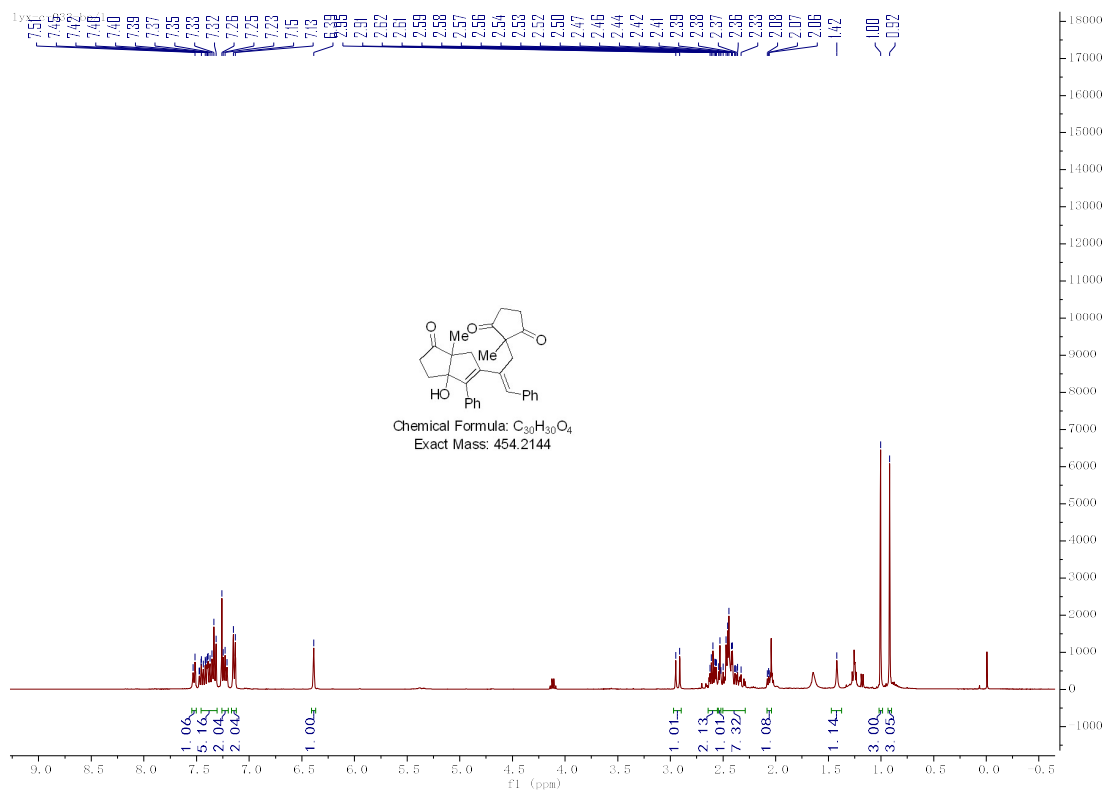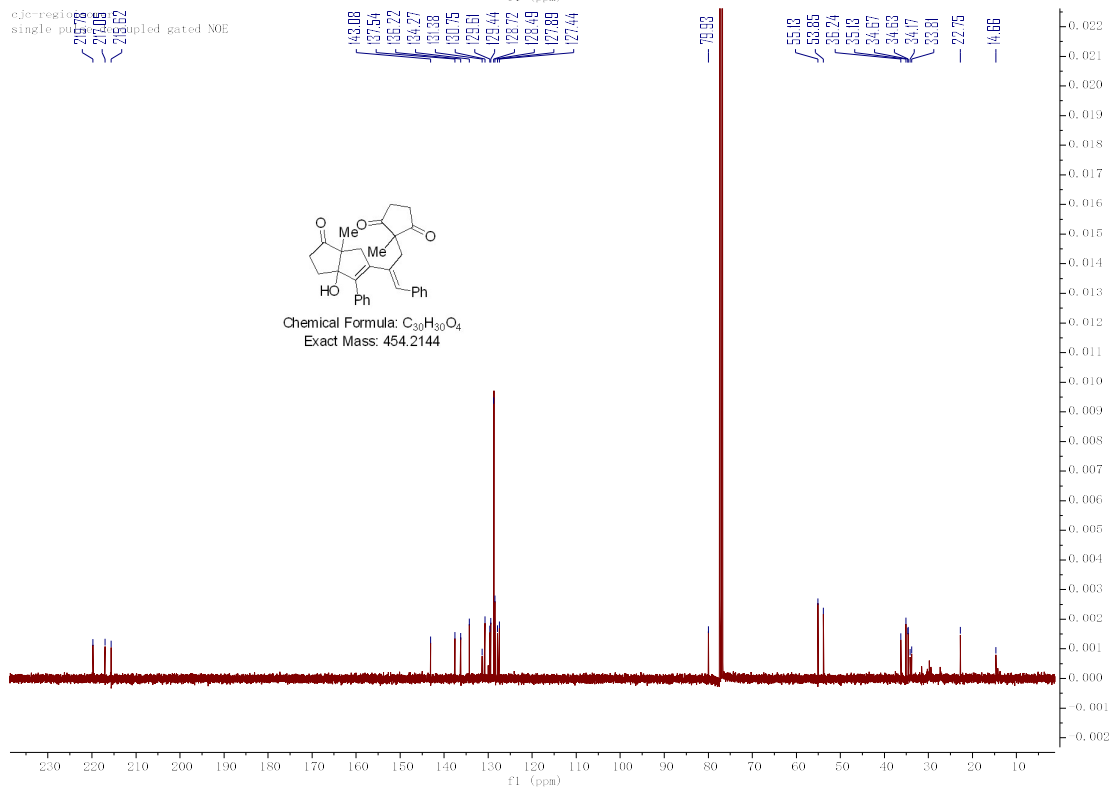

3b

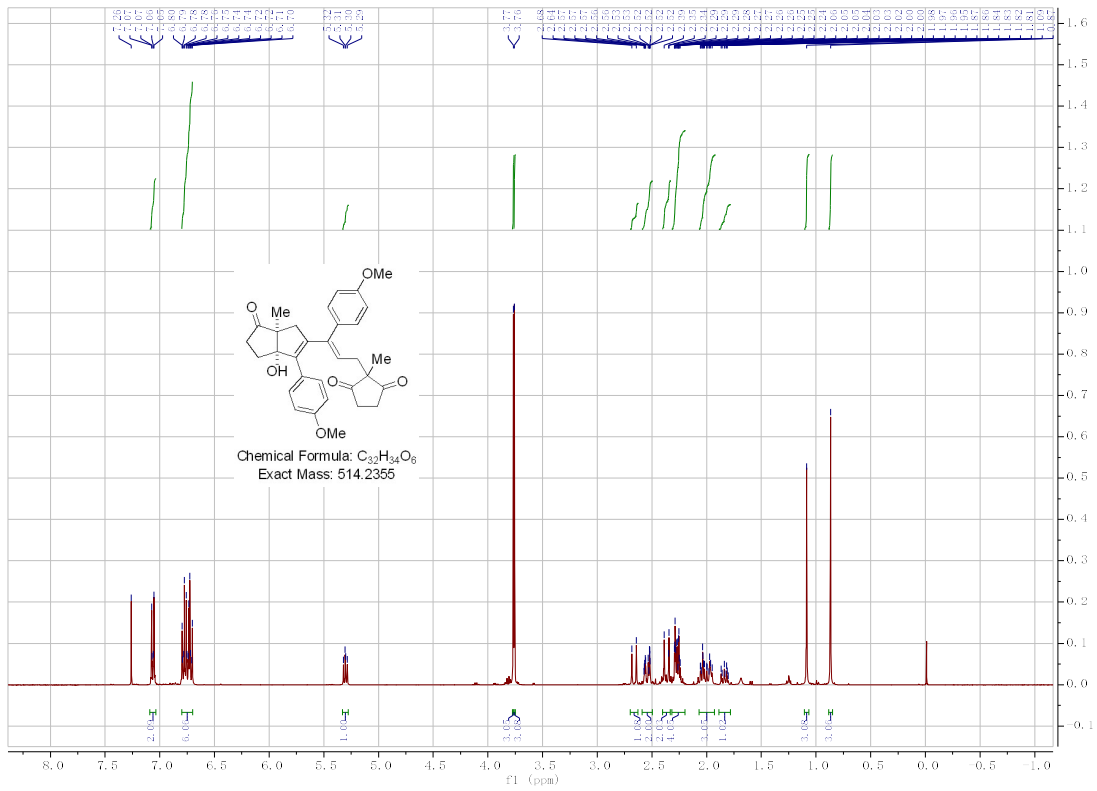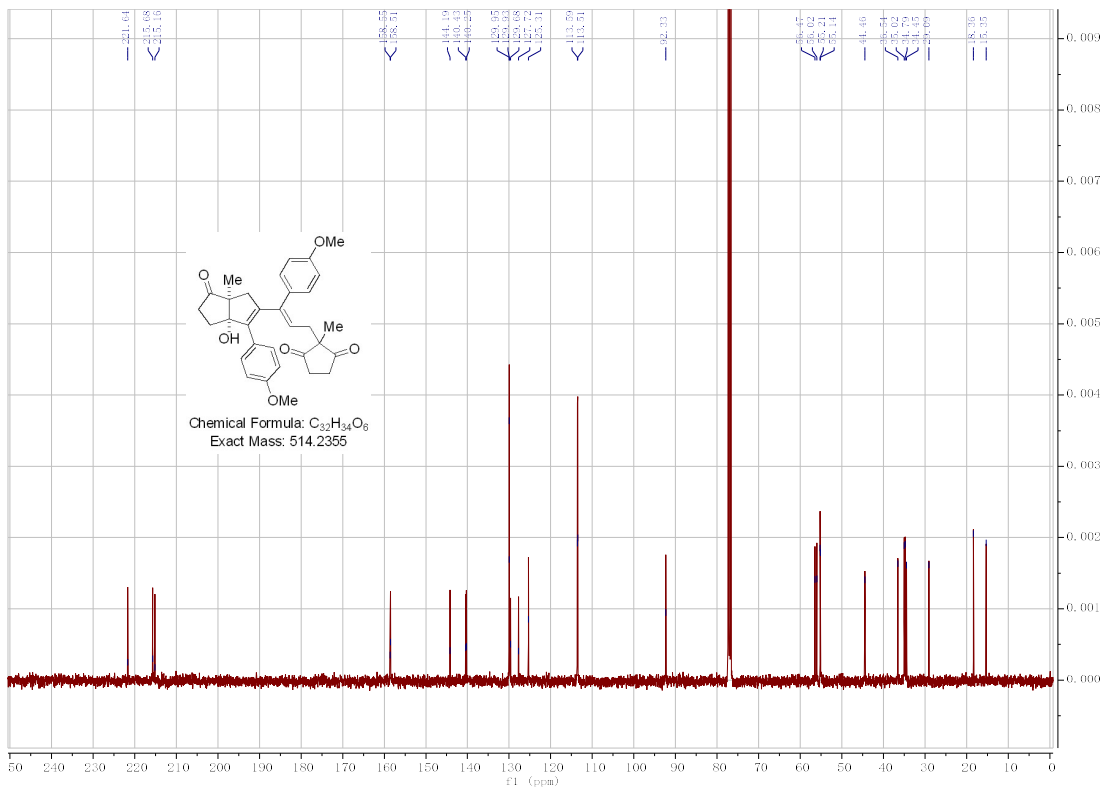

3c

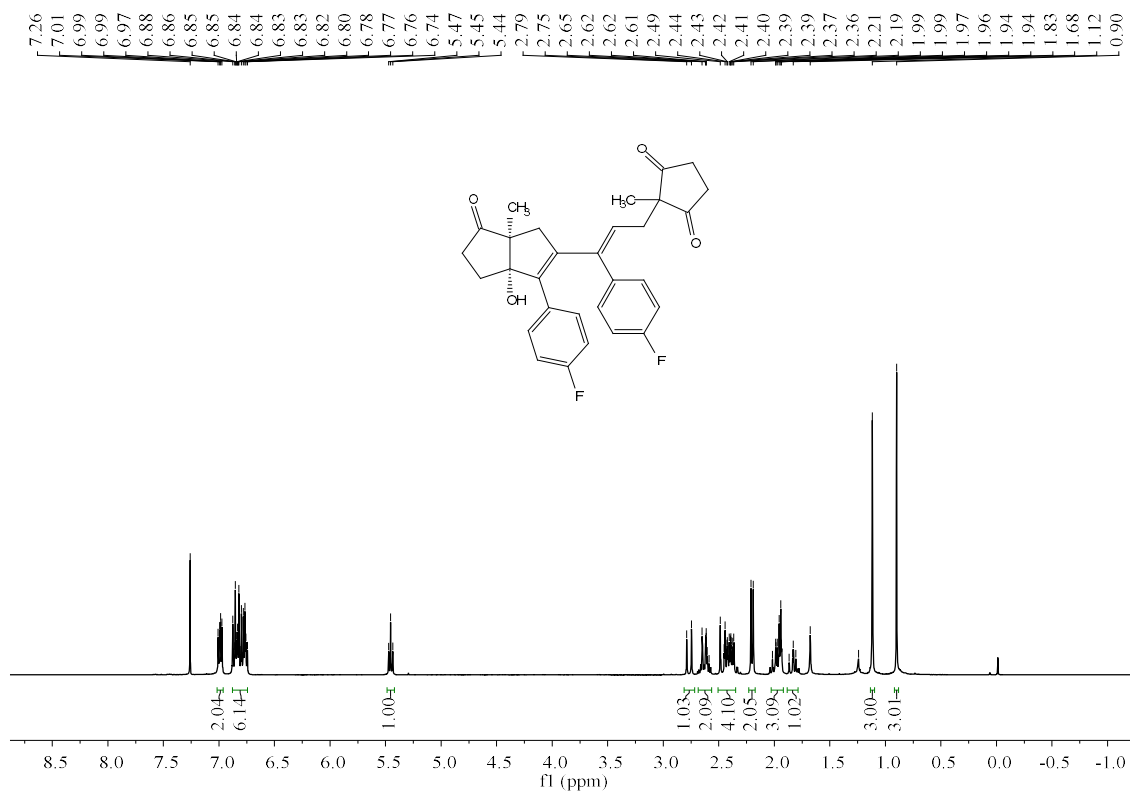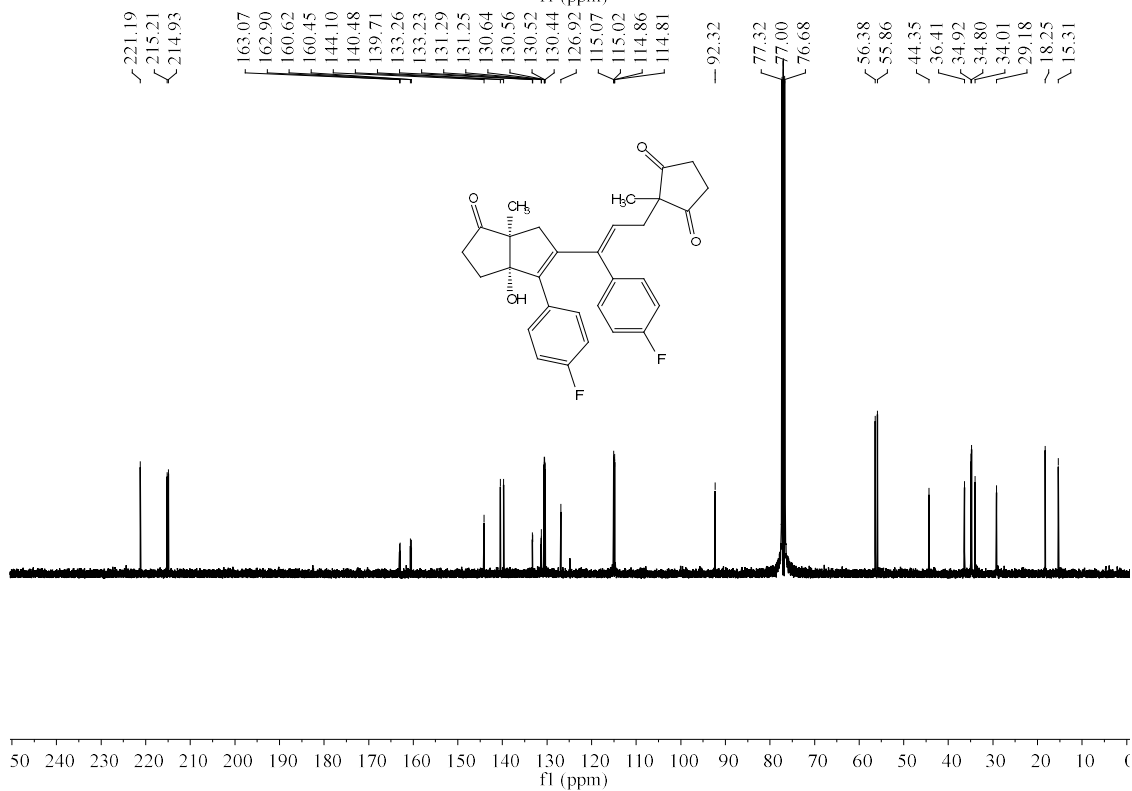



cjc\_s2  
single\_pulse

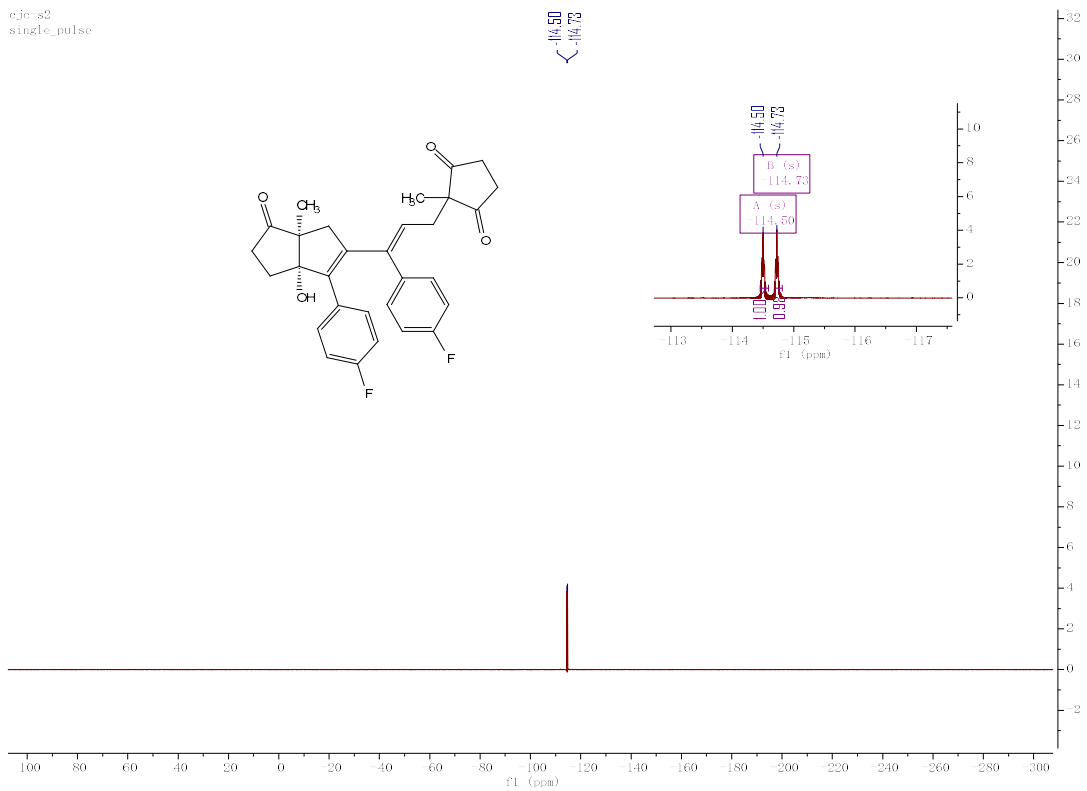

# 3d

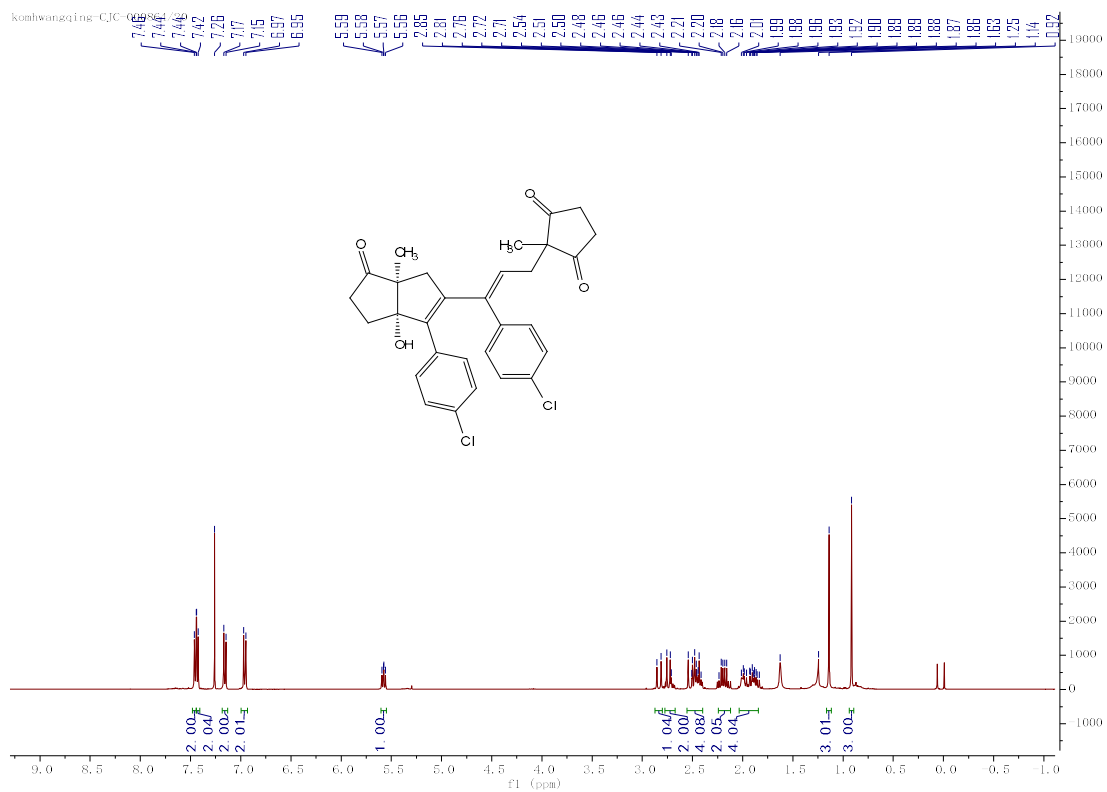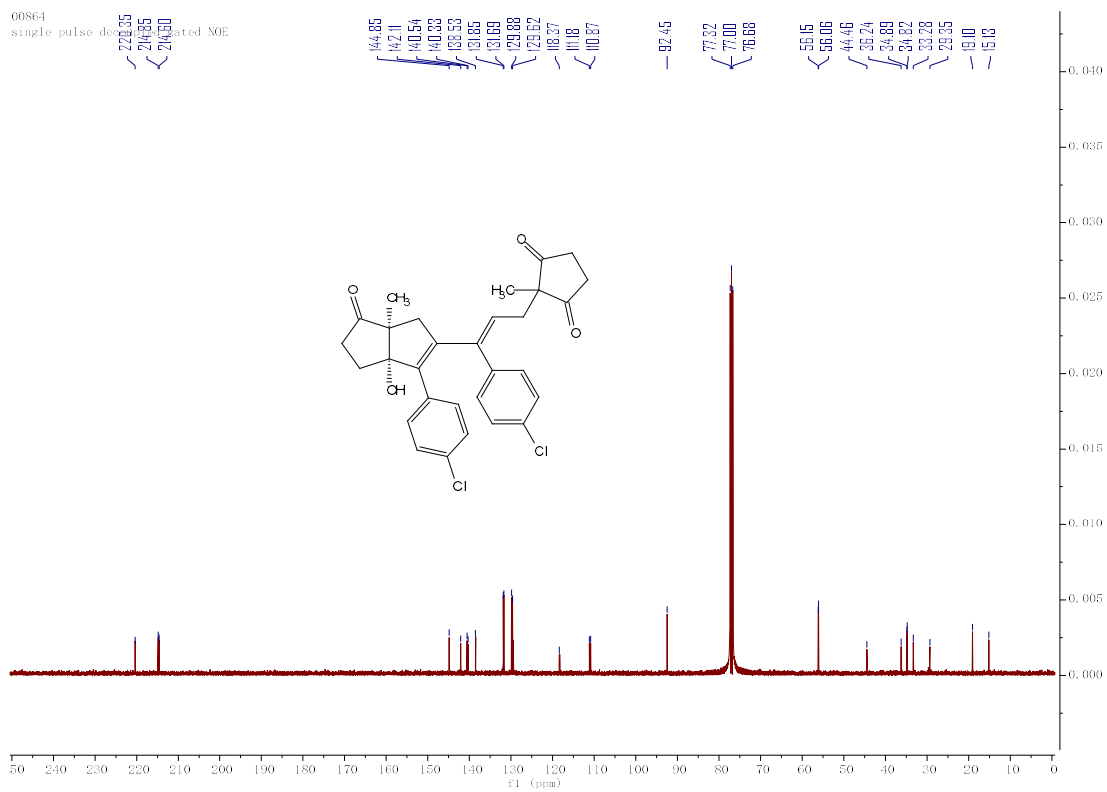

3e

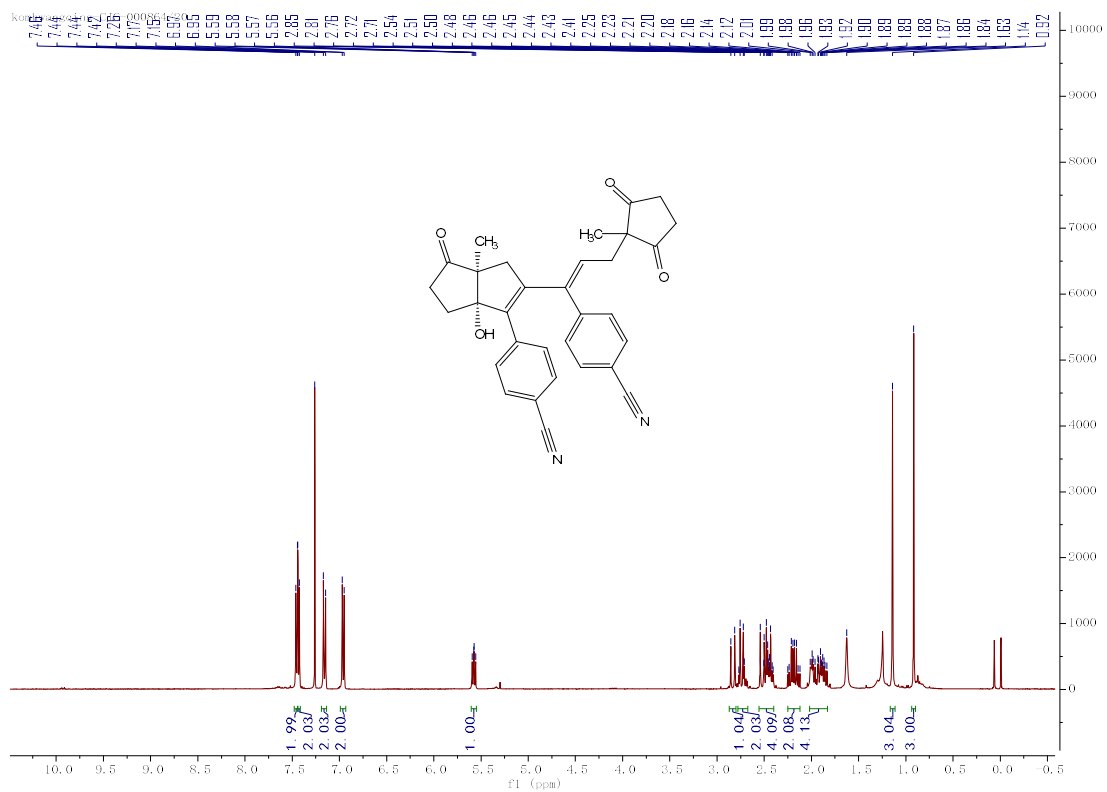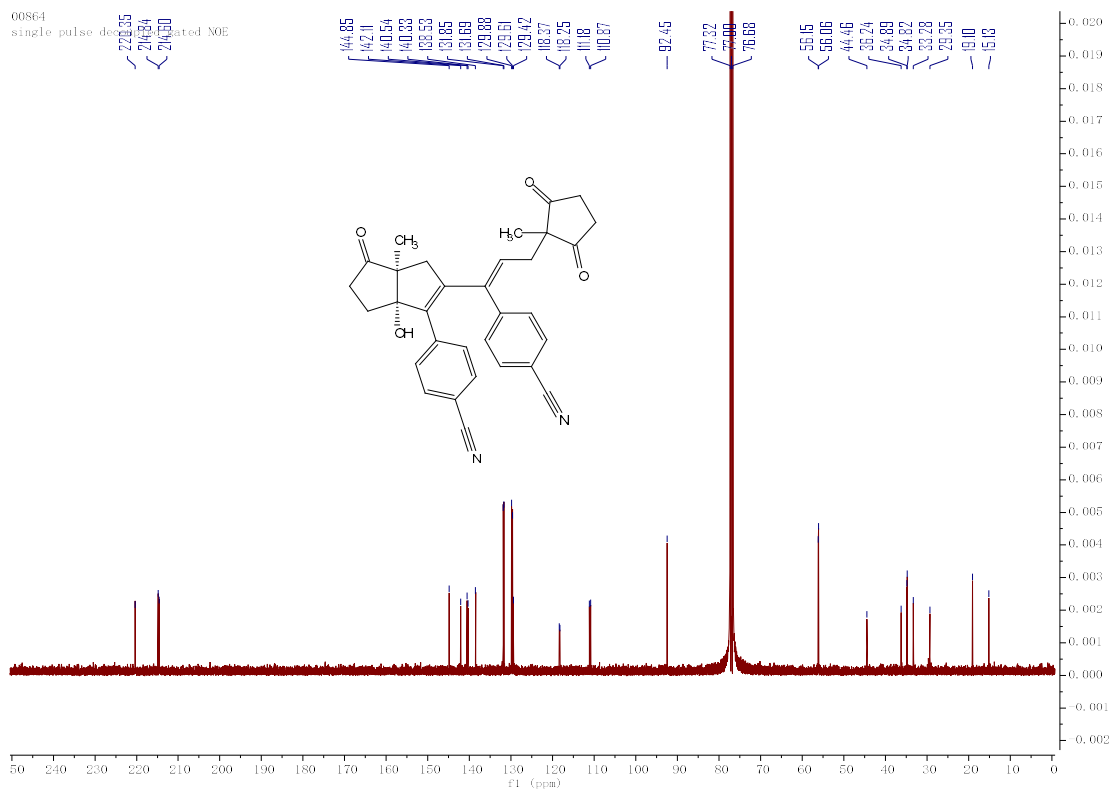

3f

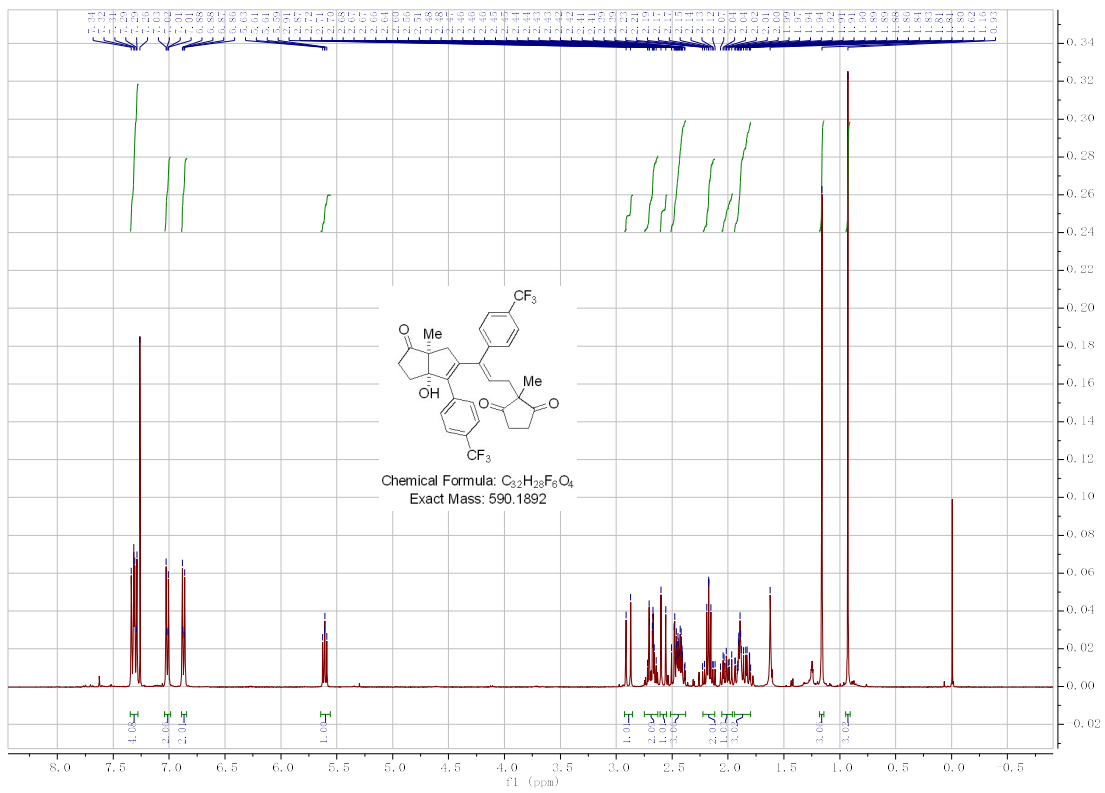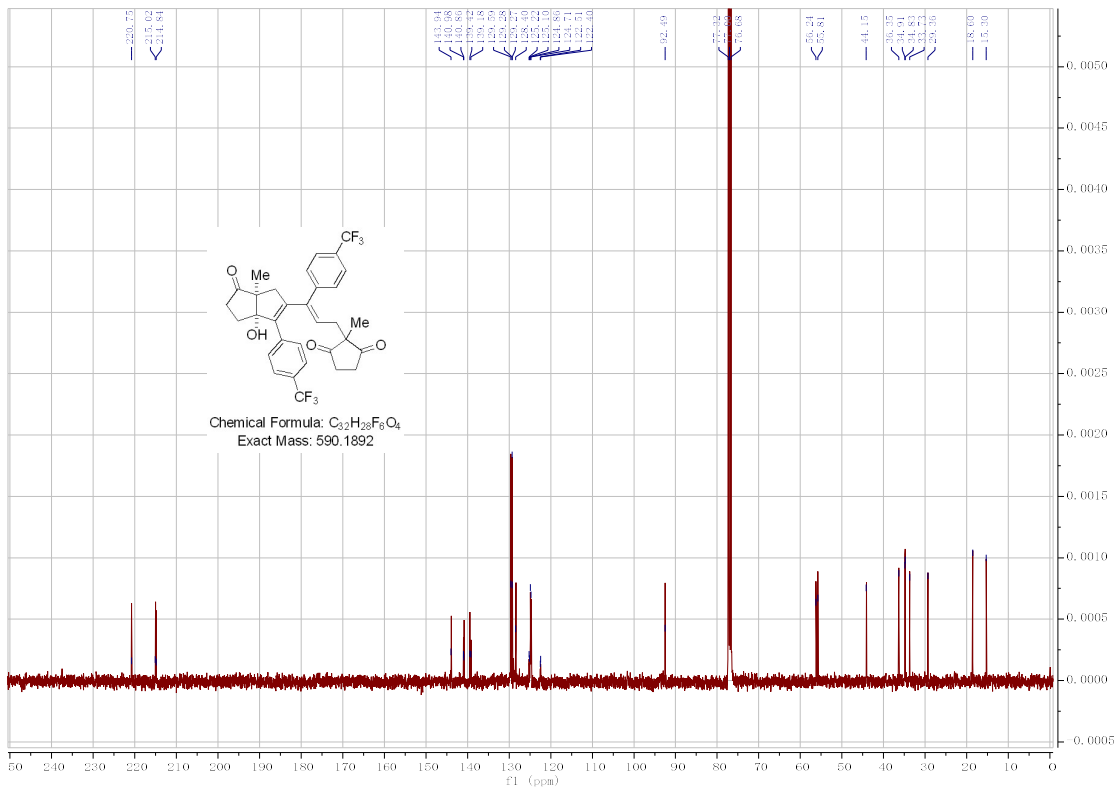

S180

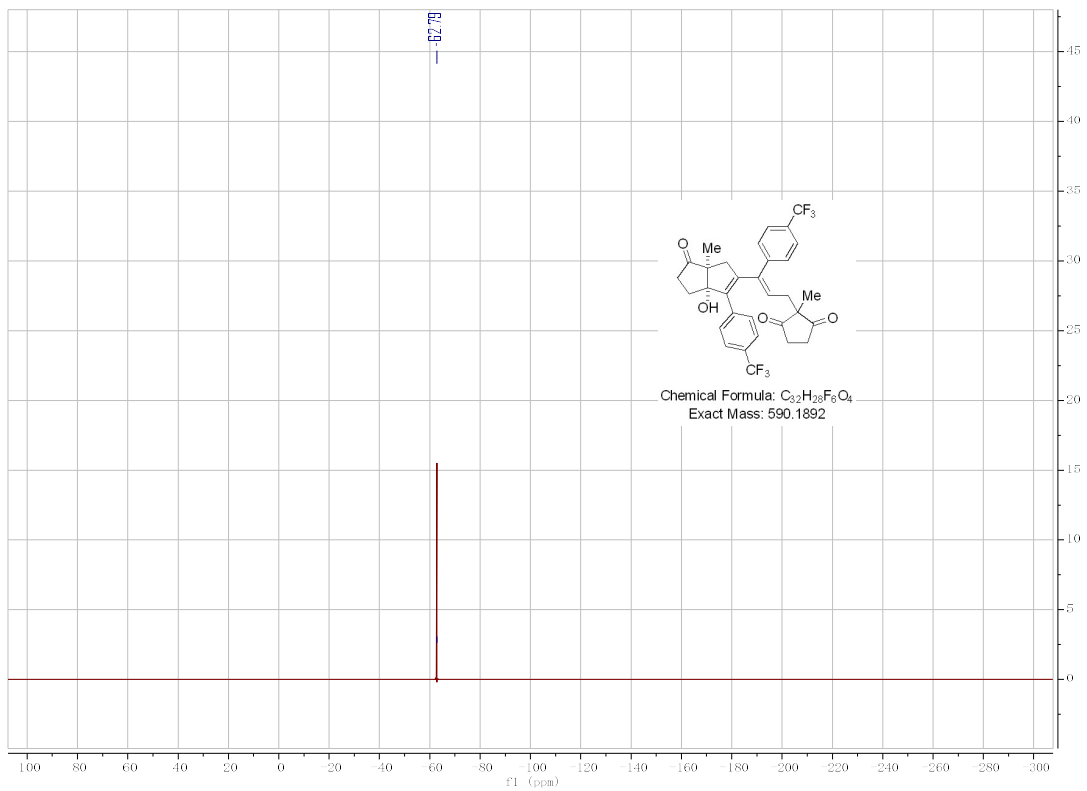

3g

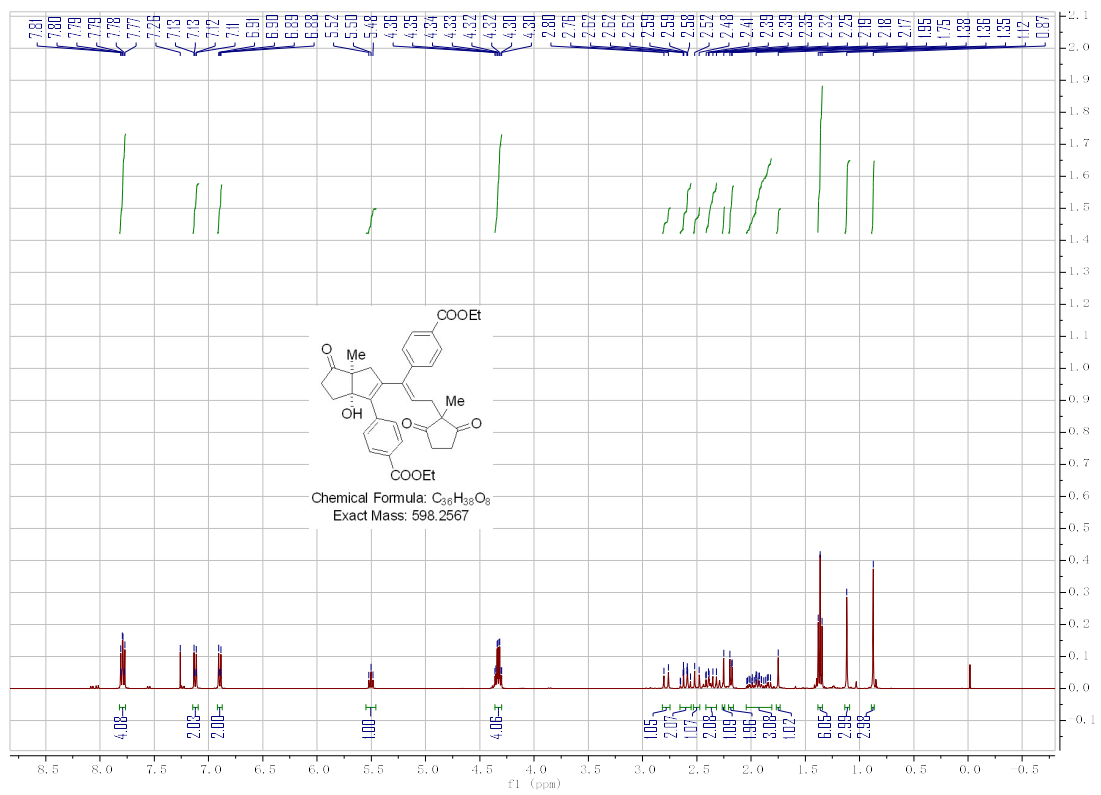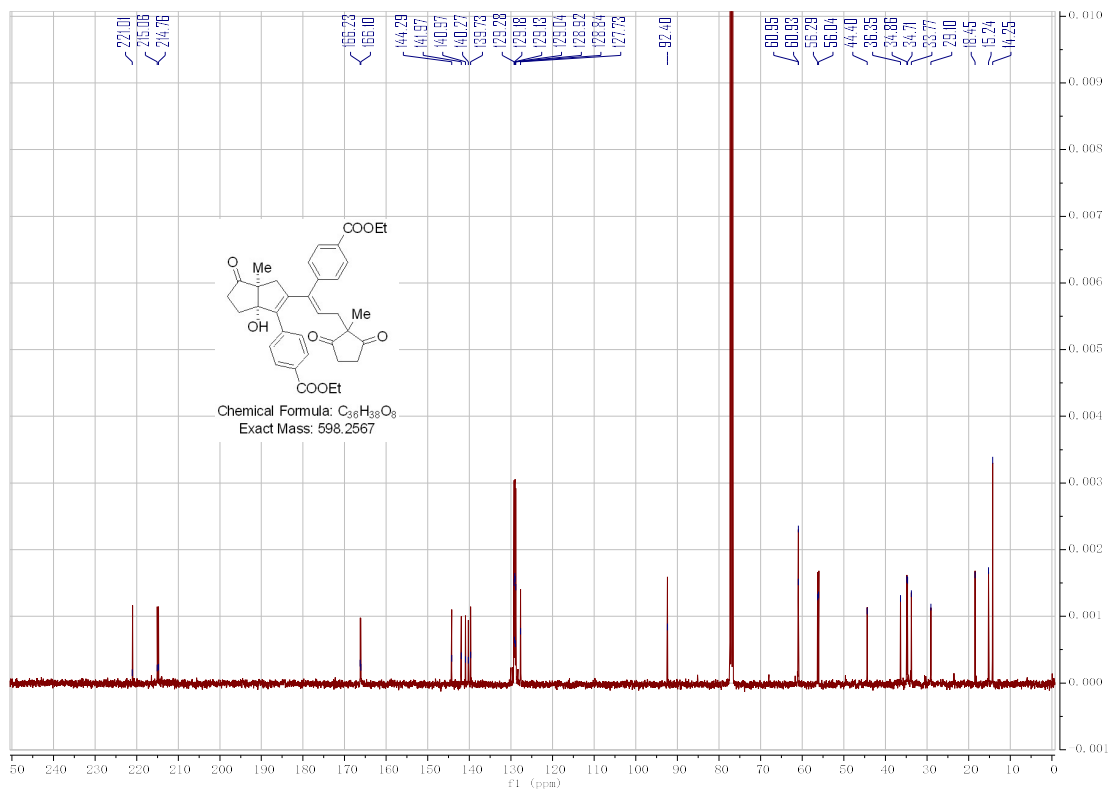

# 3h

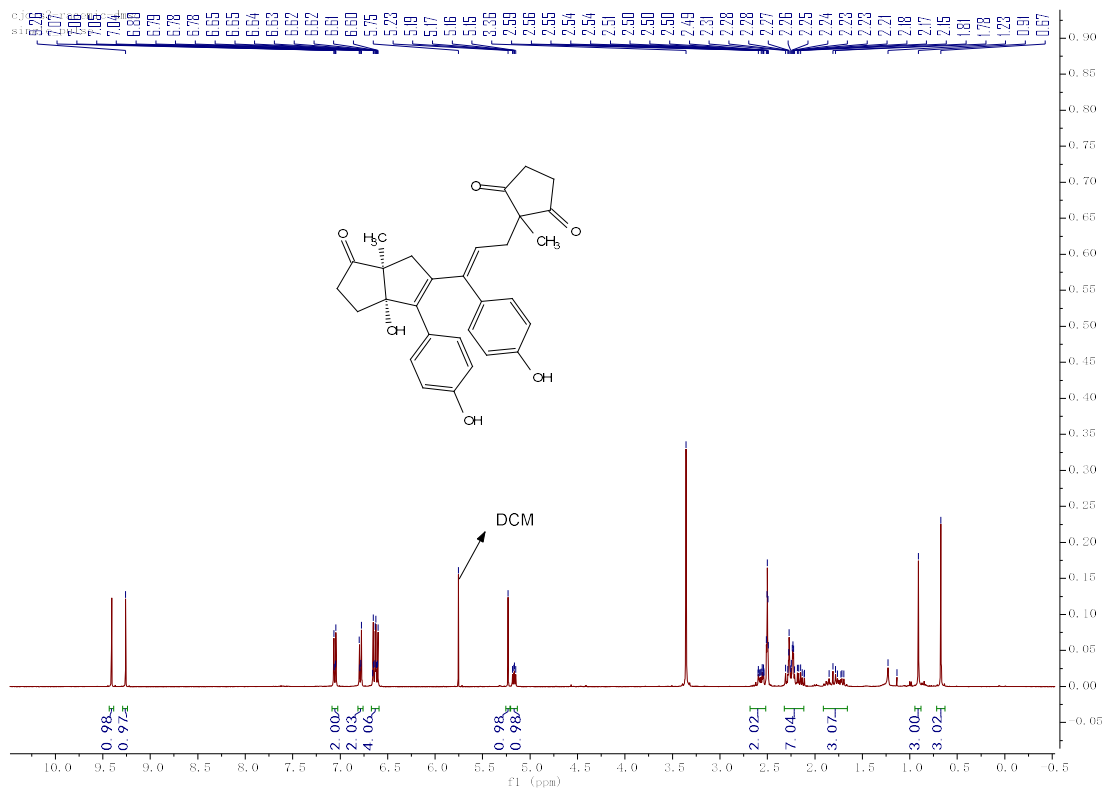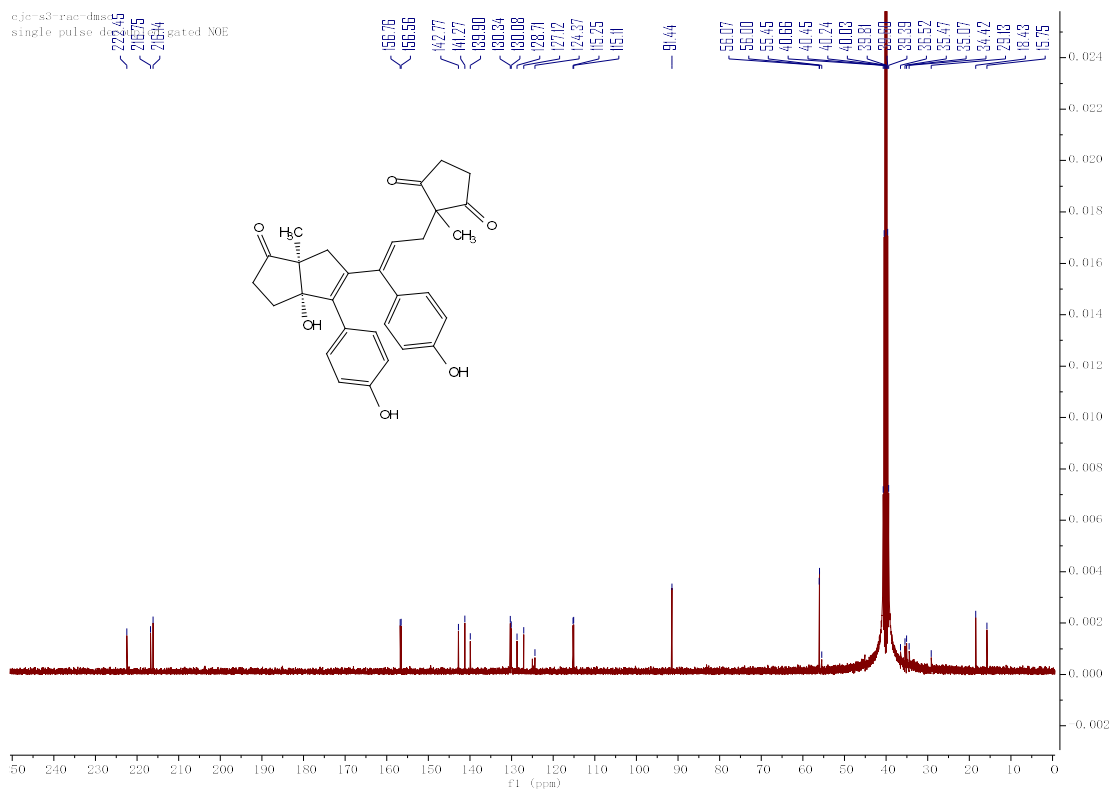

3i

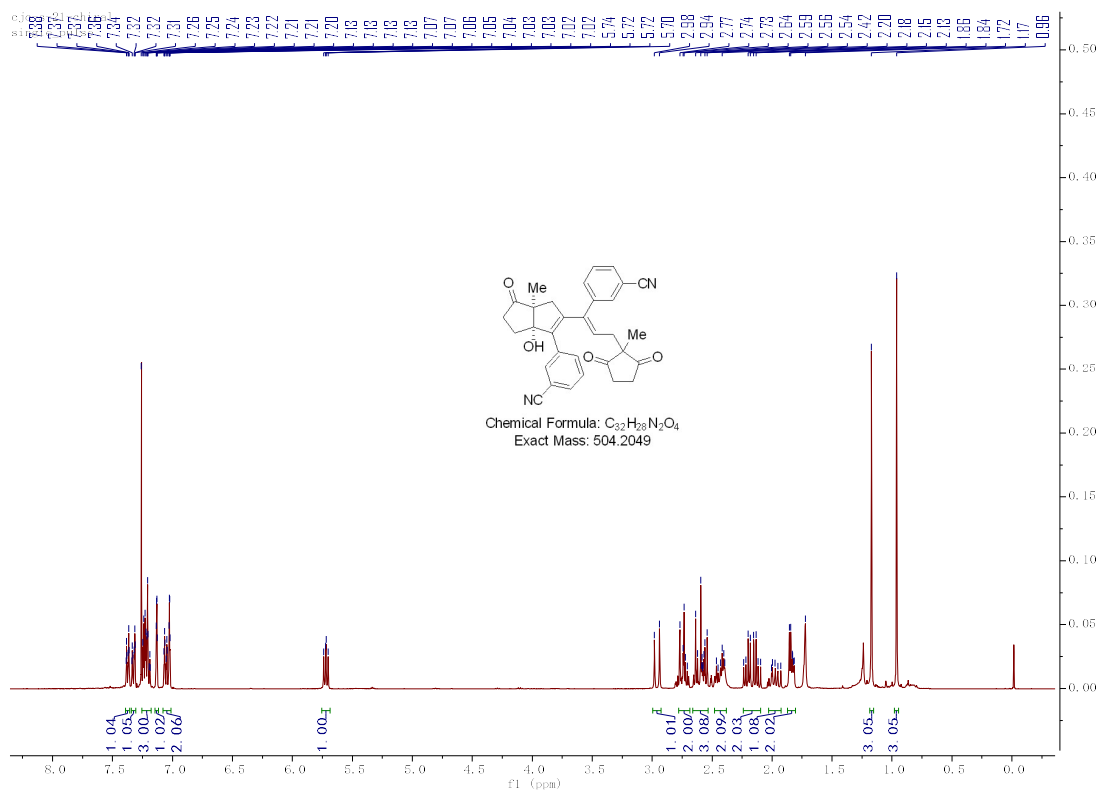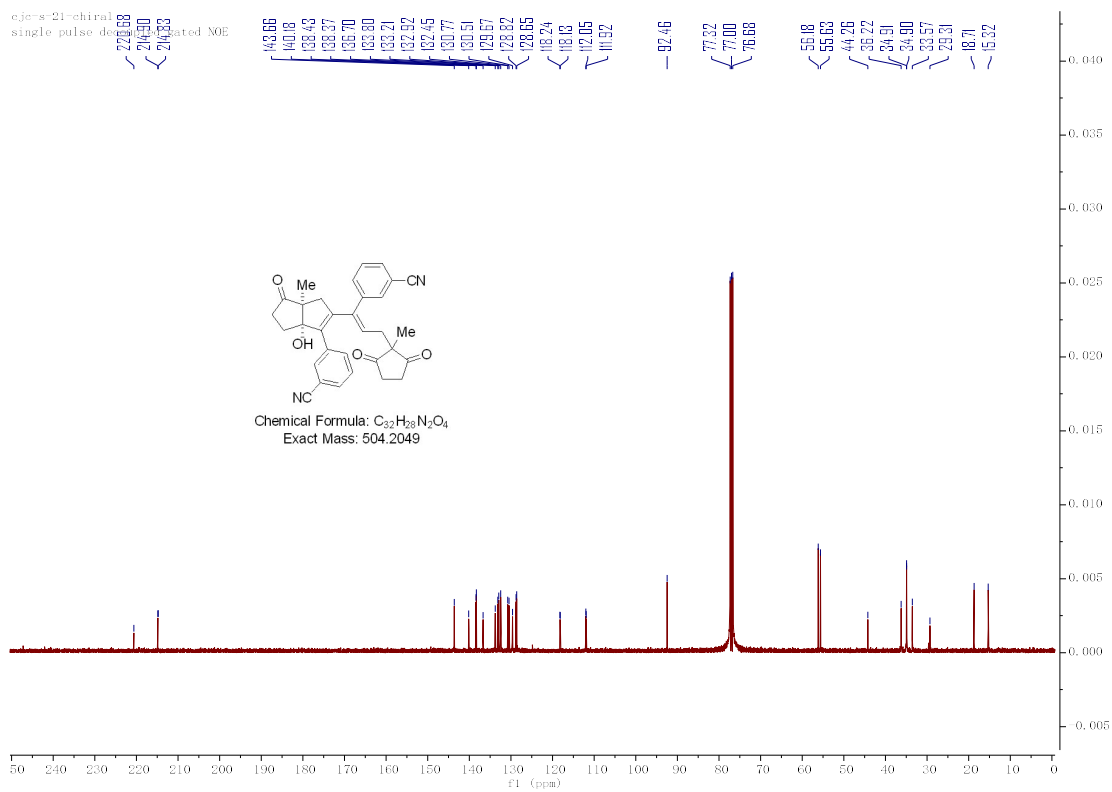



3j

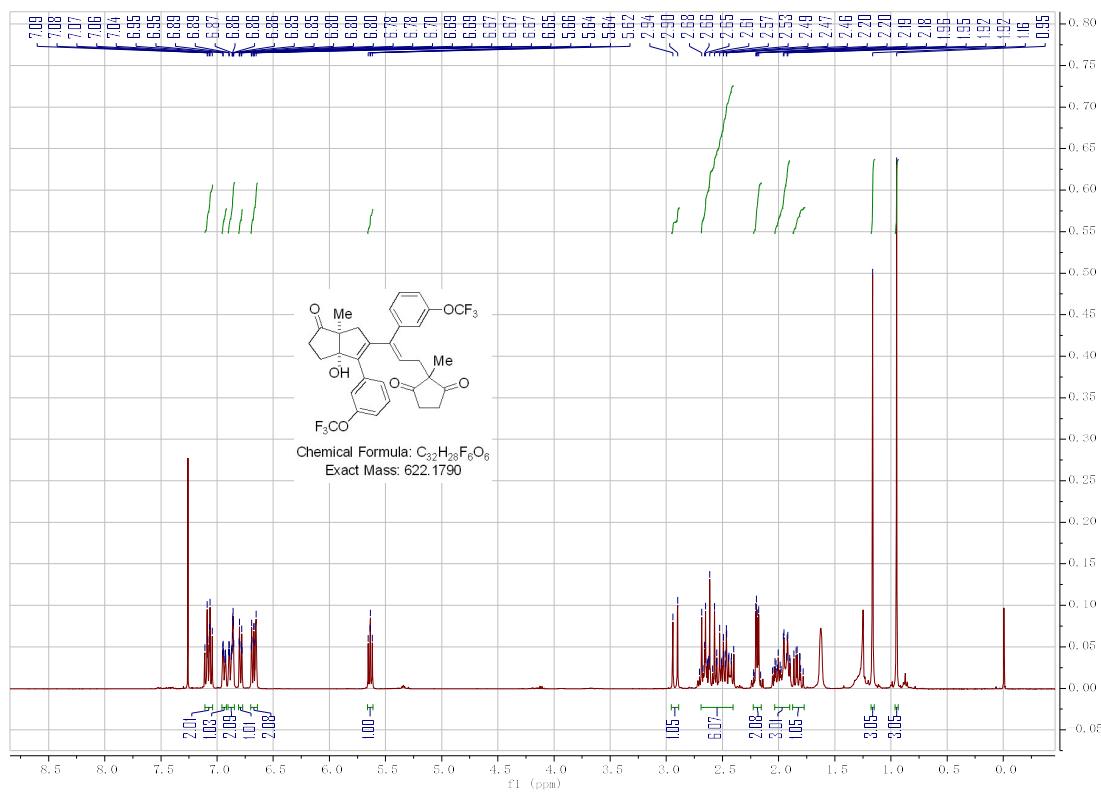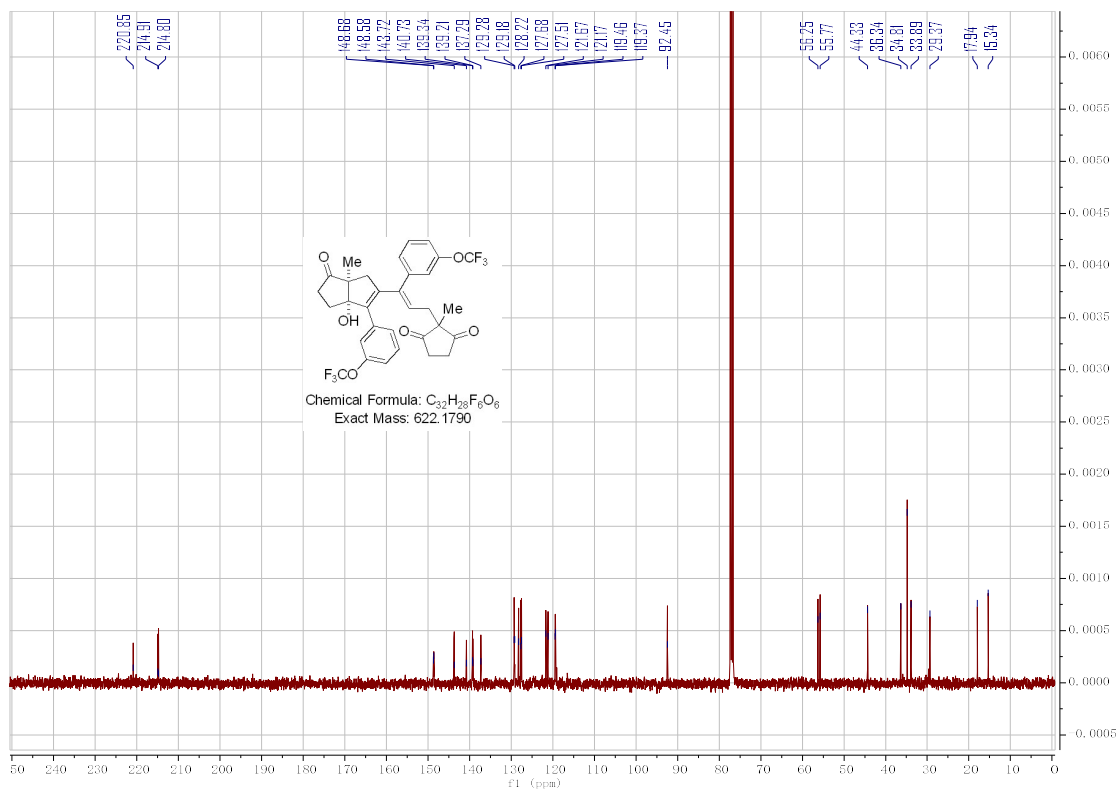

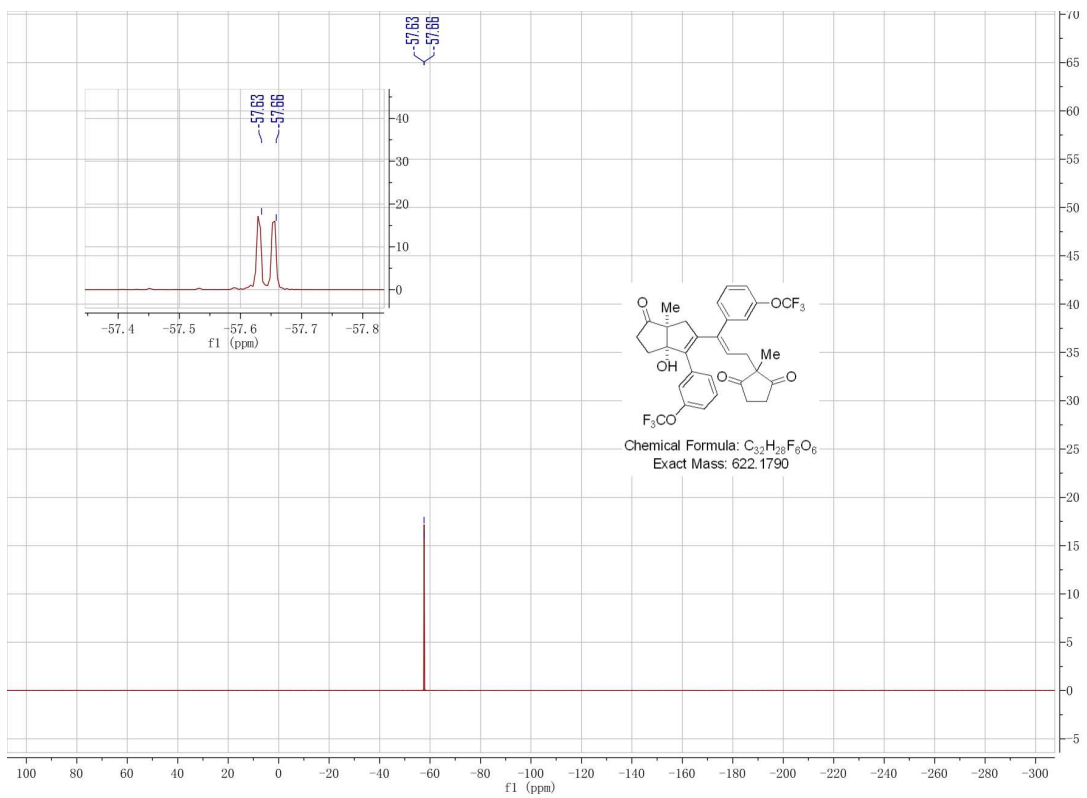

3k

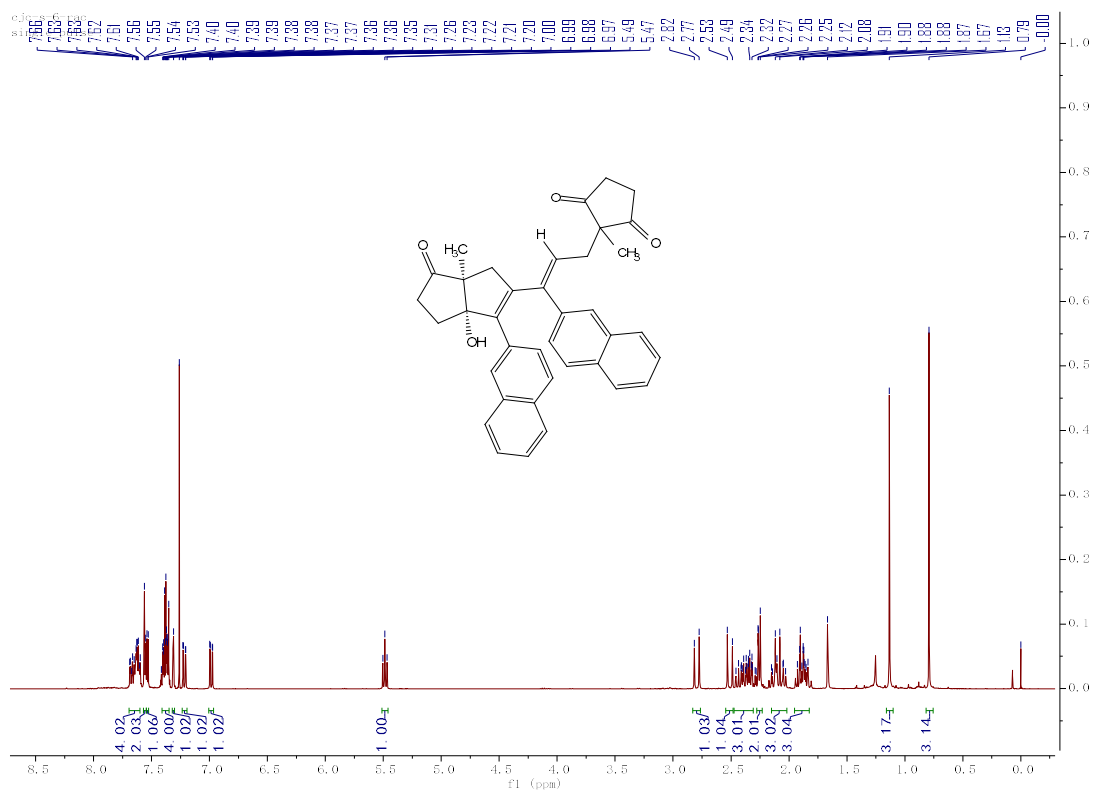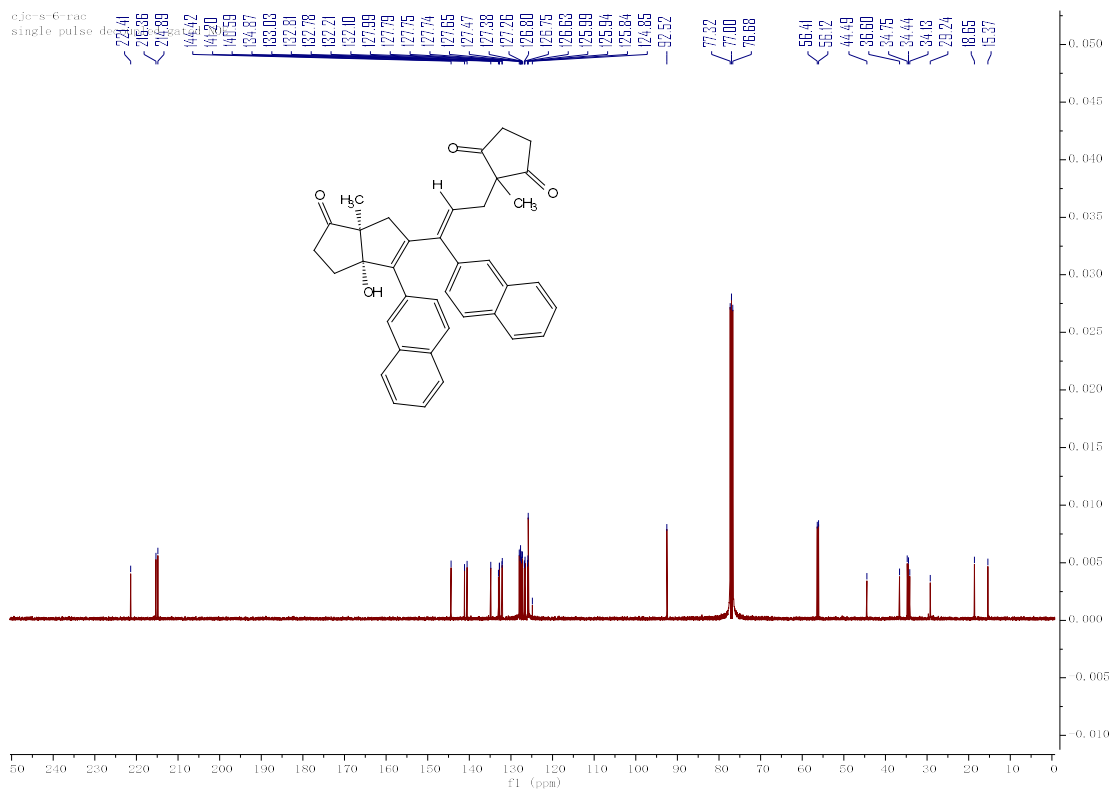

S187

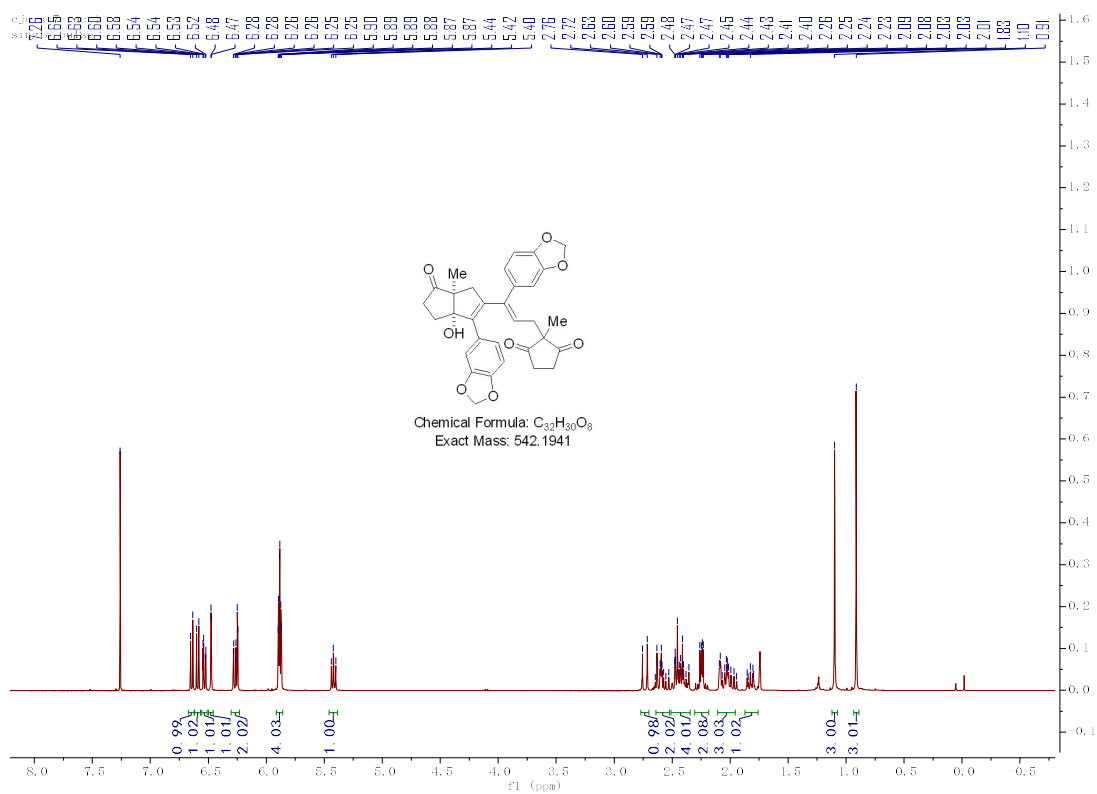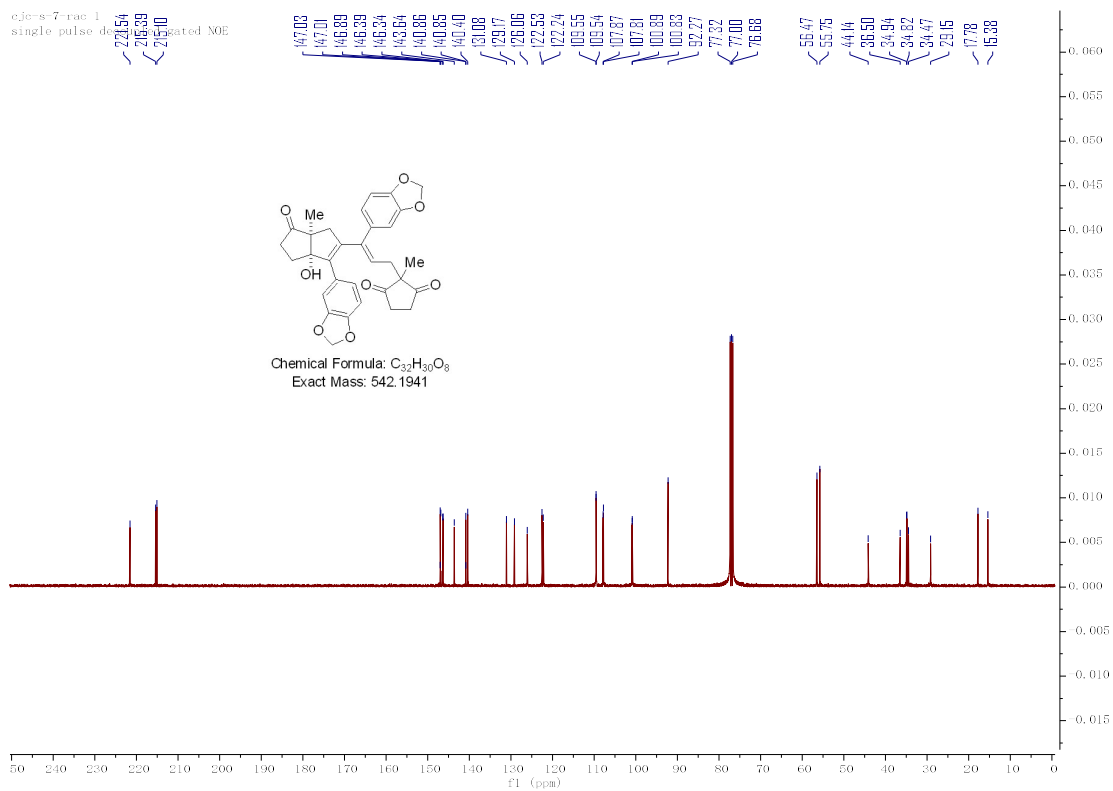

**3m**

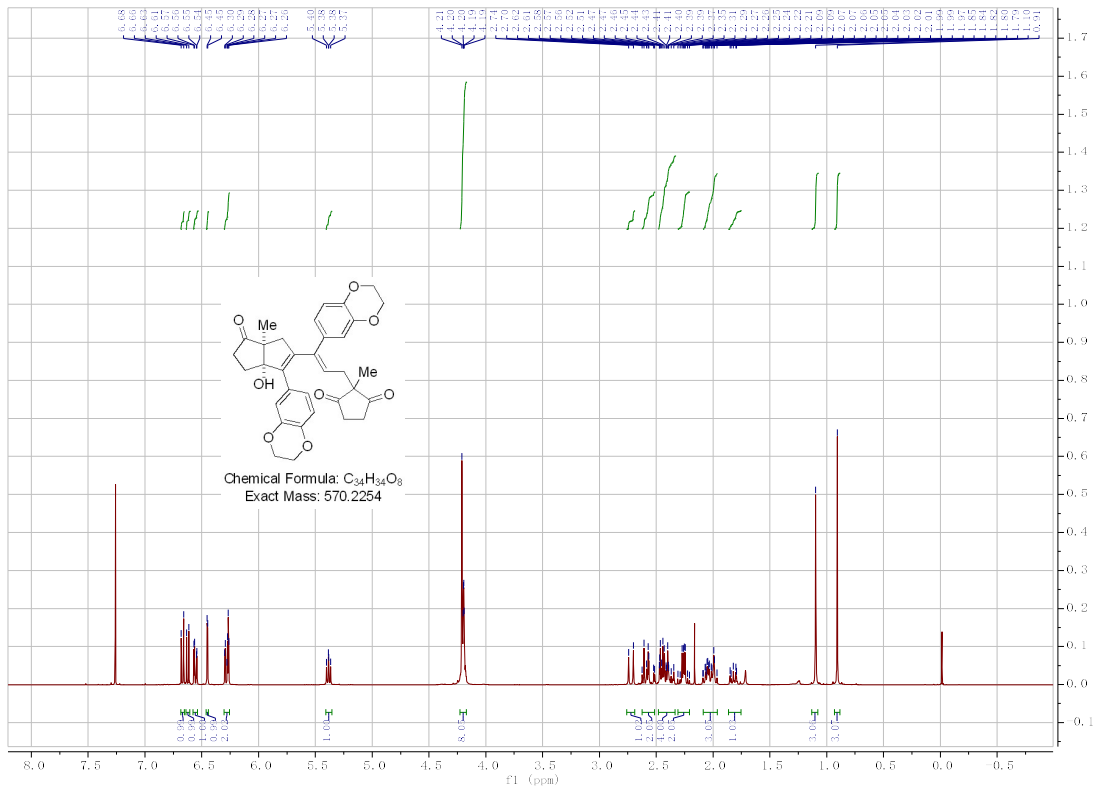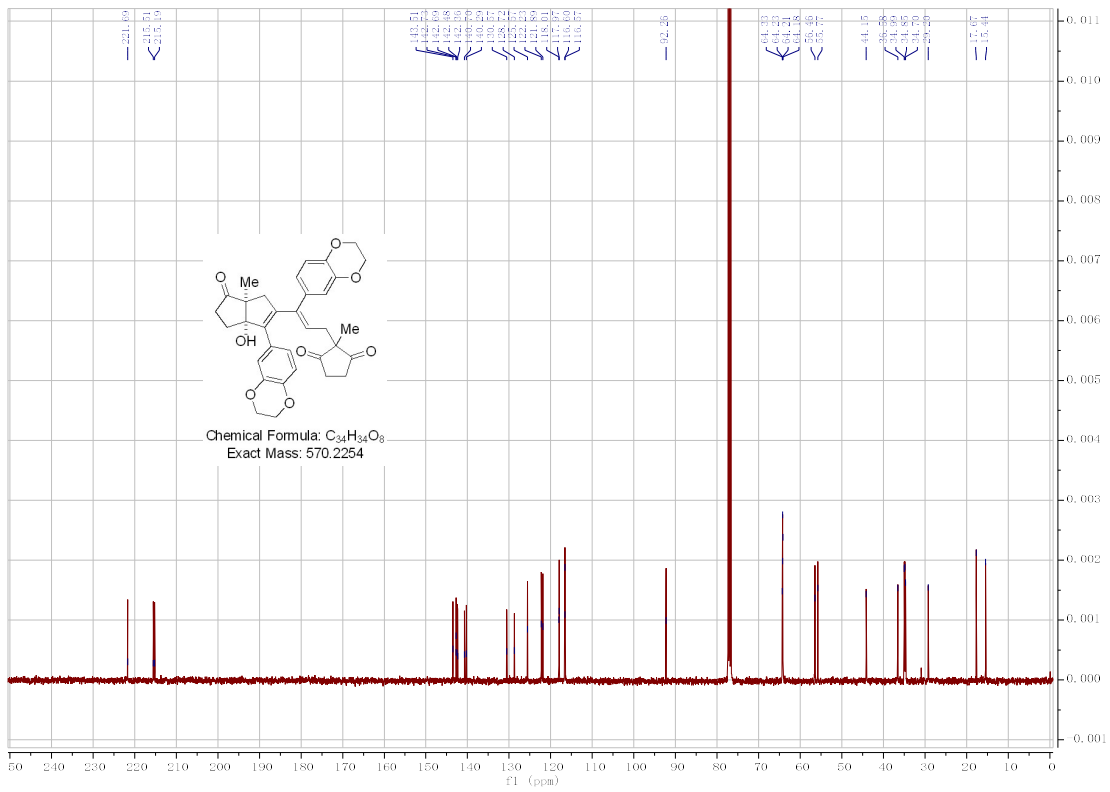

S189

3n

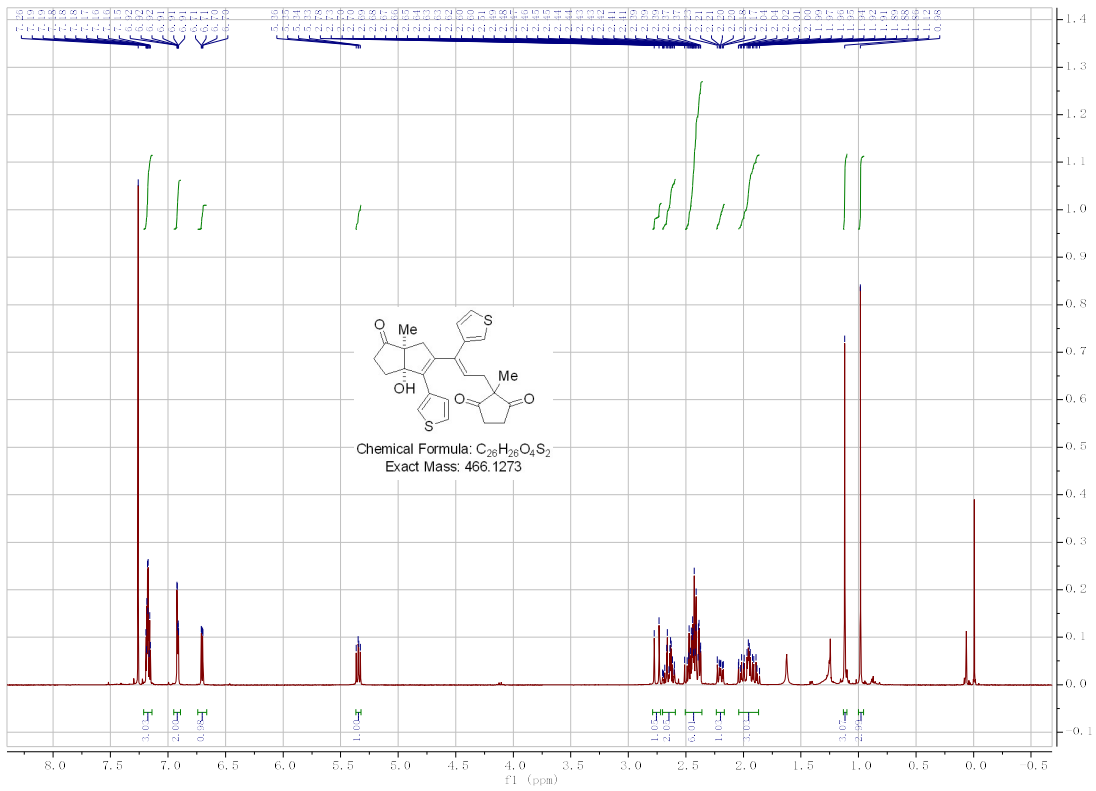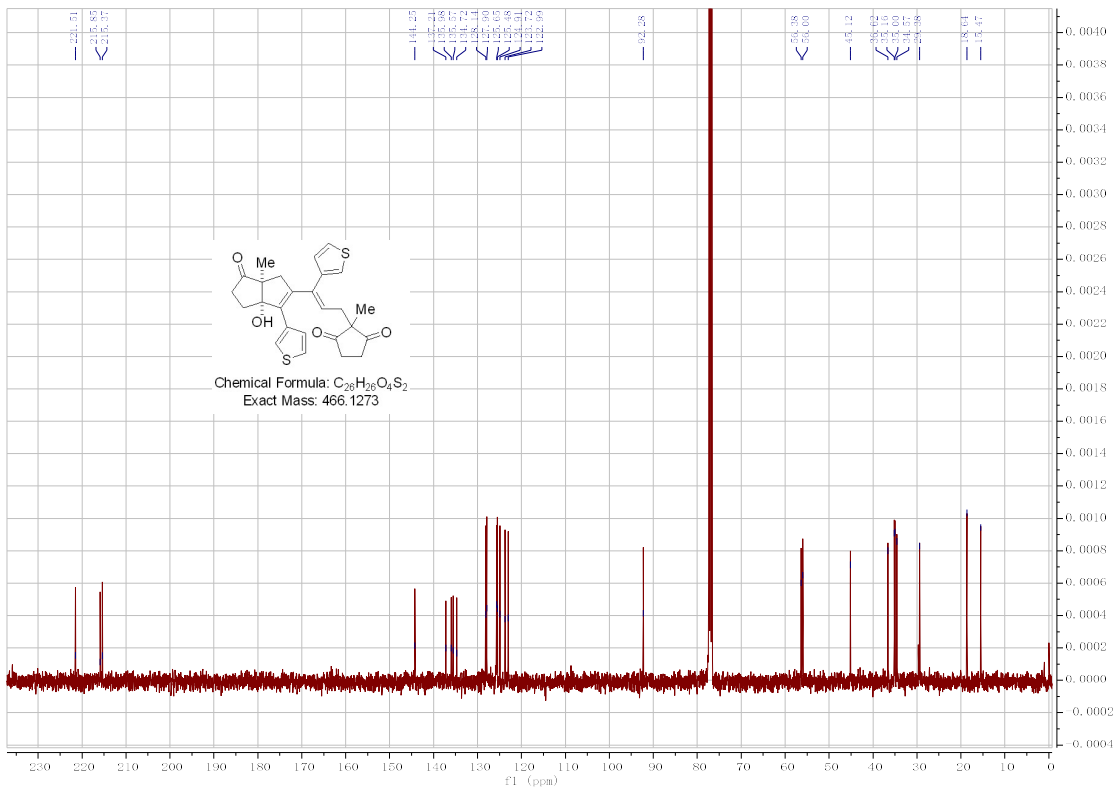

S190

30

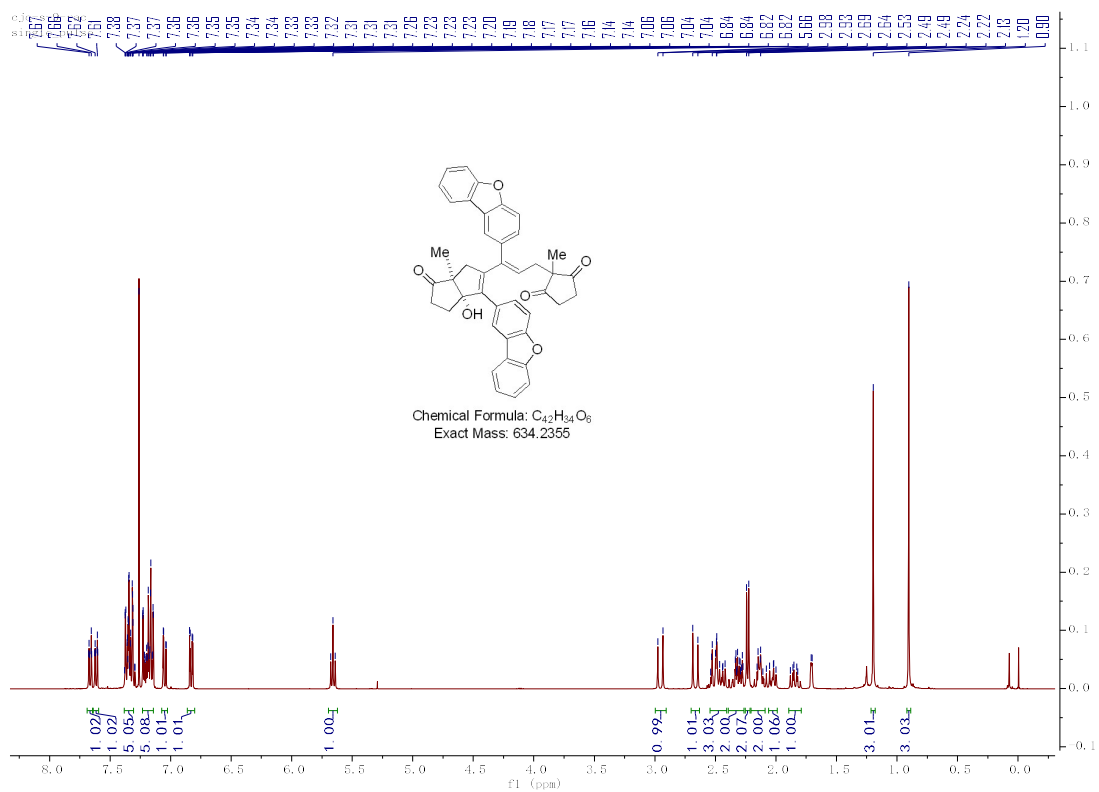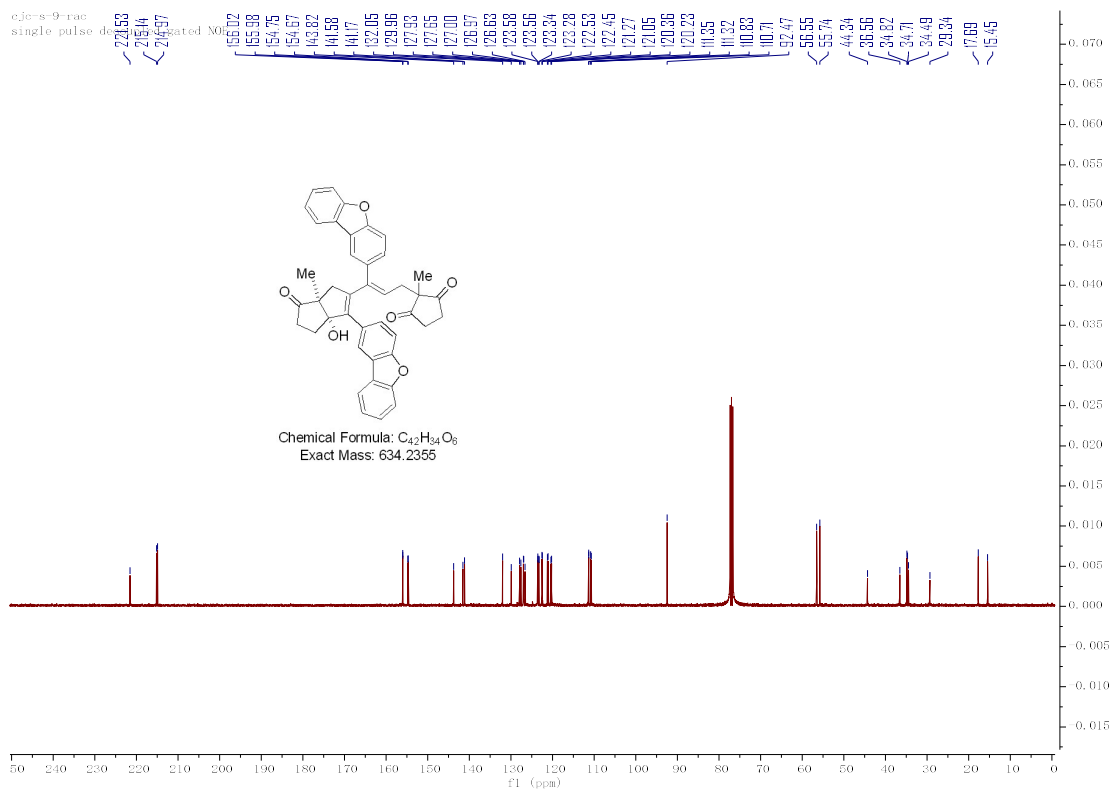

S191

3p

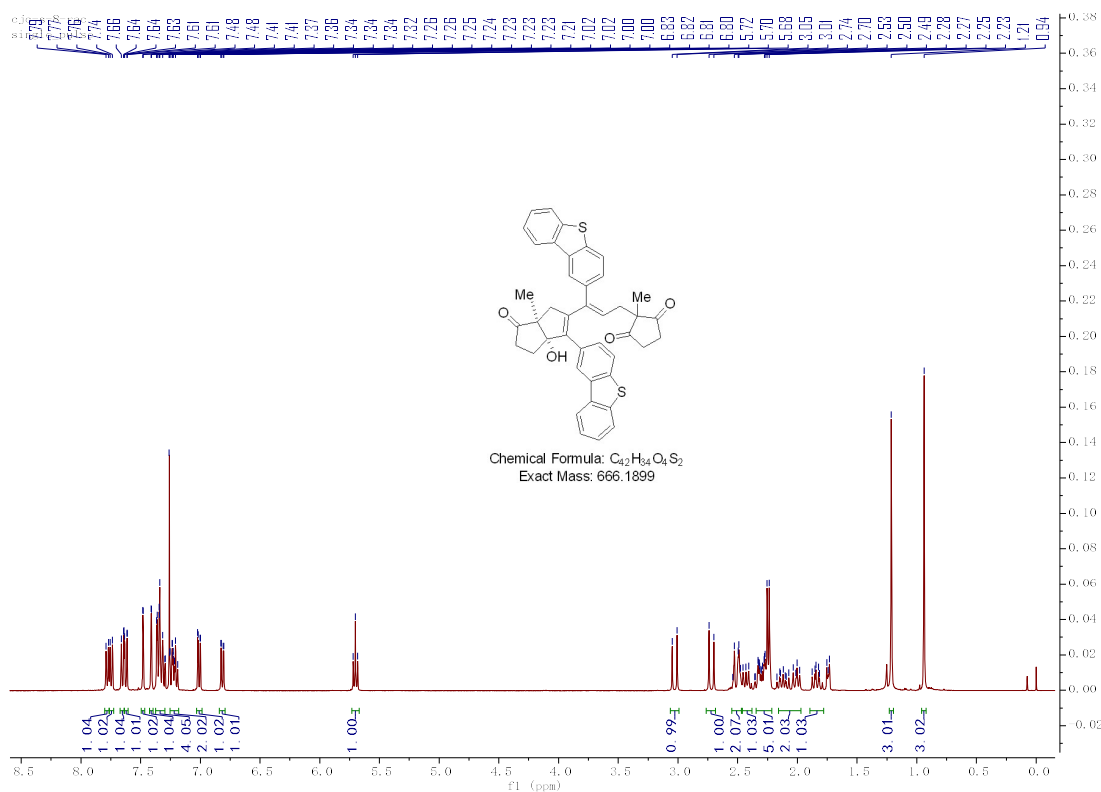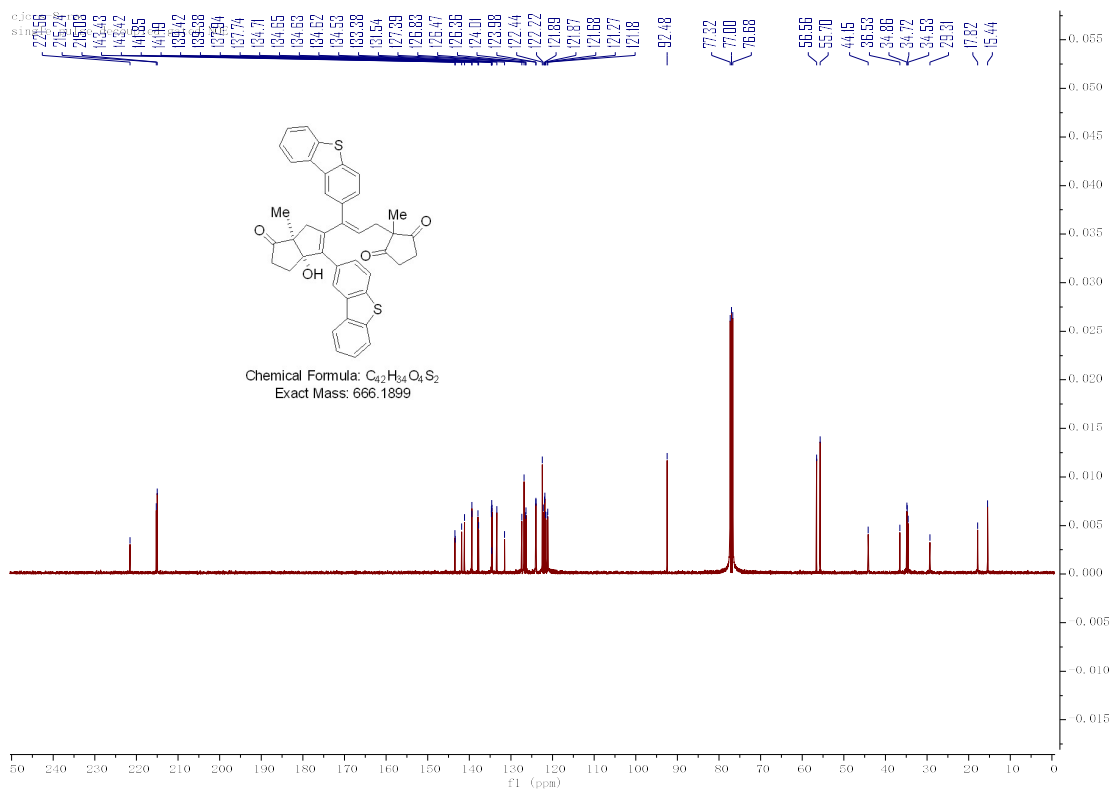



3q

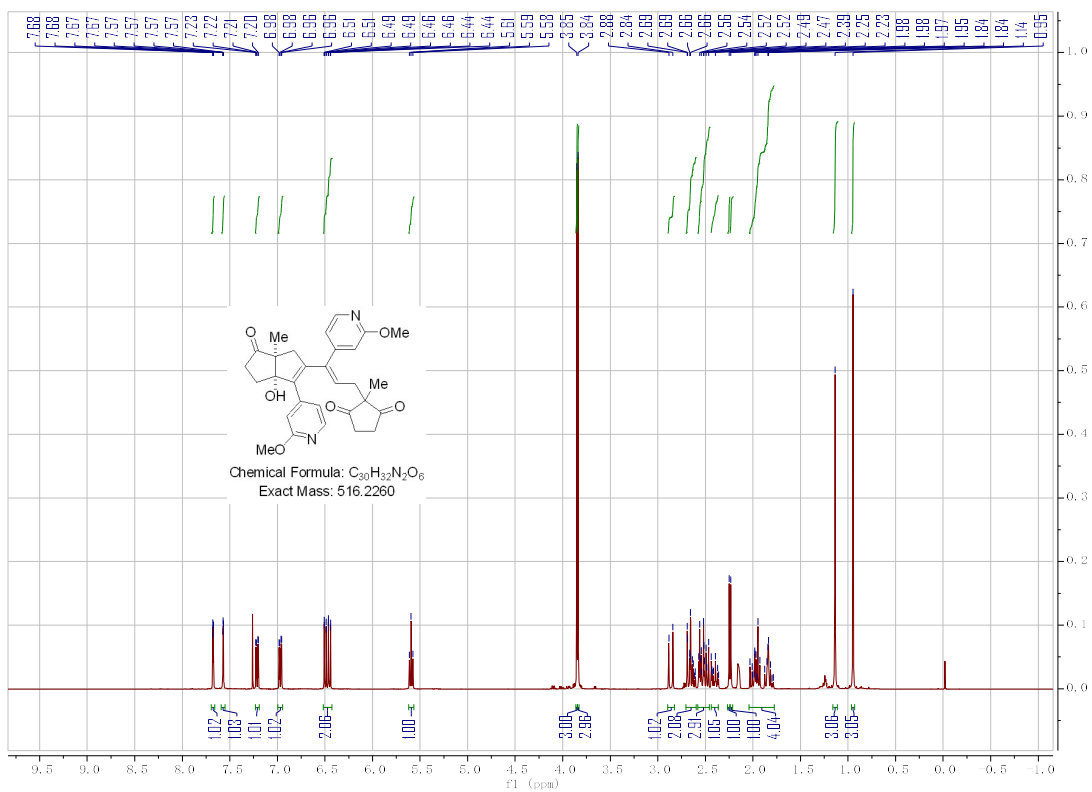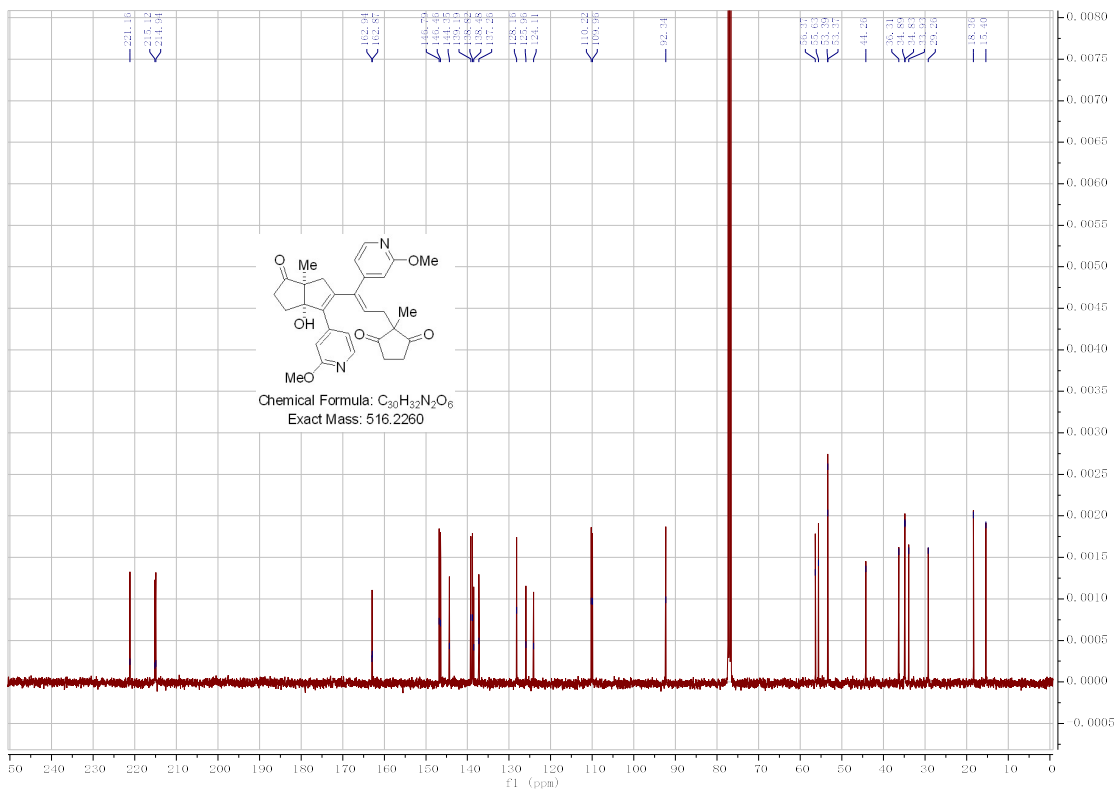

3r

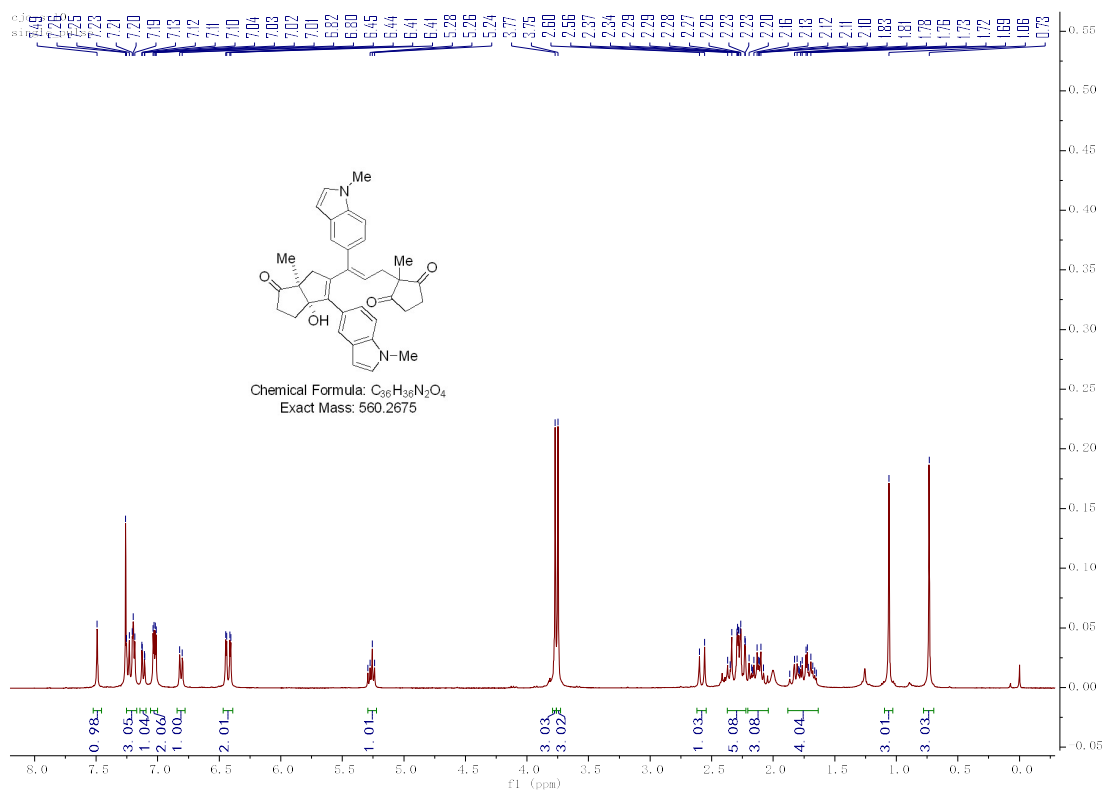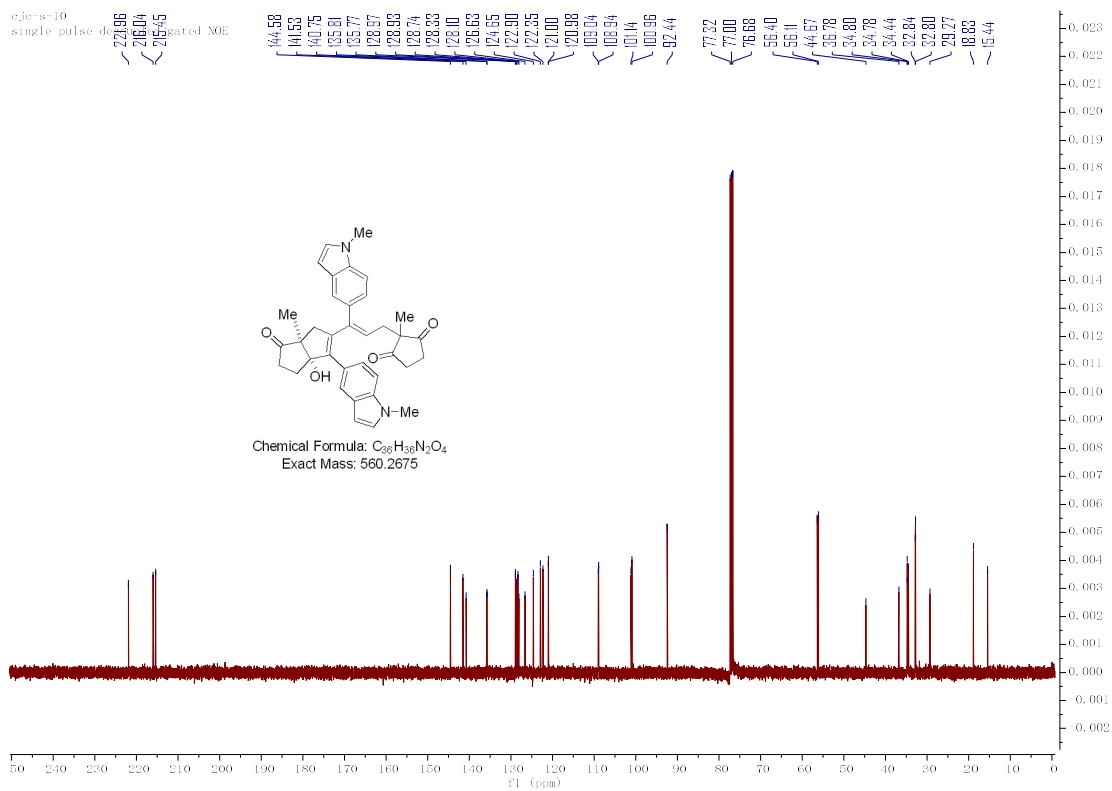

3s

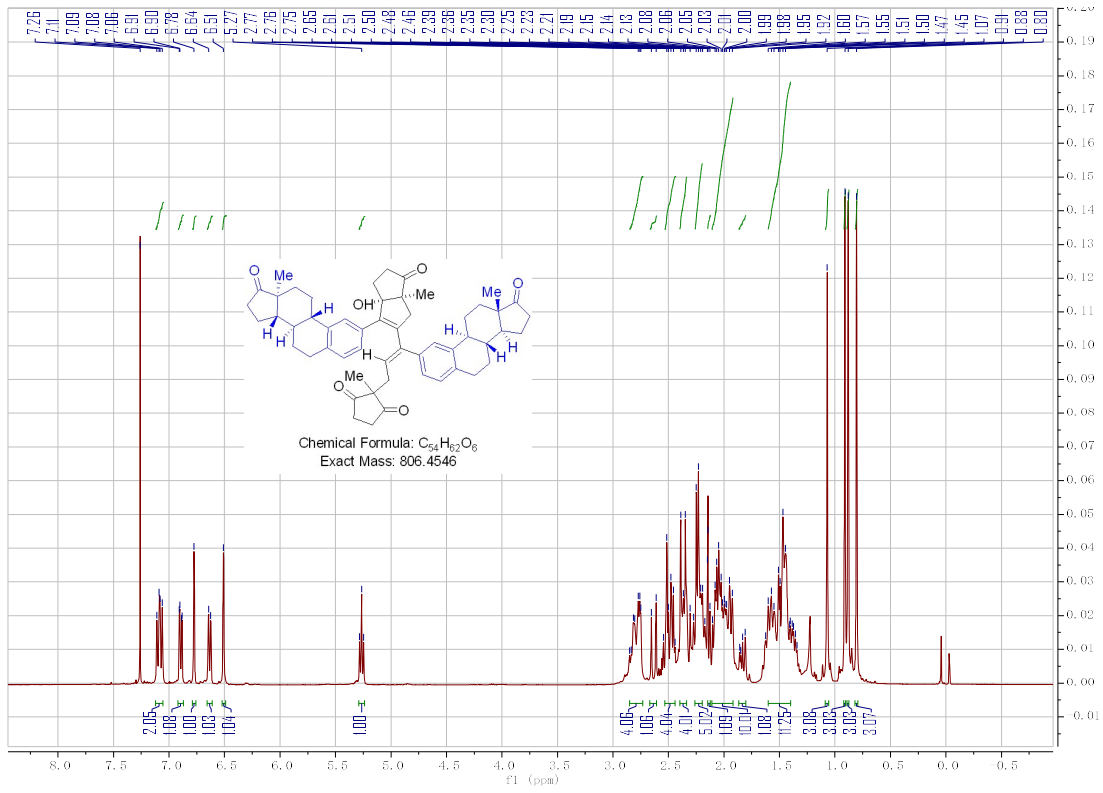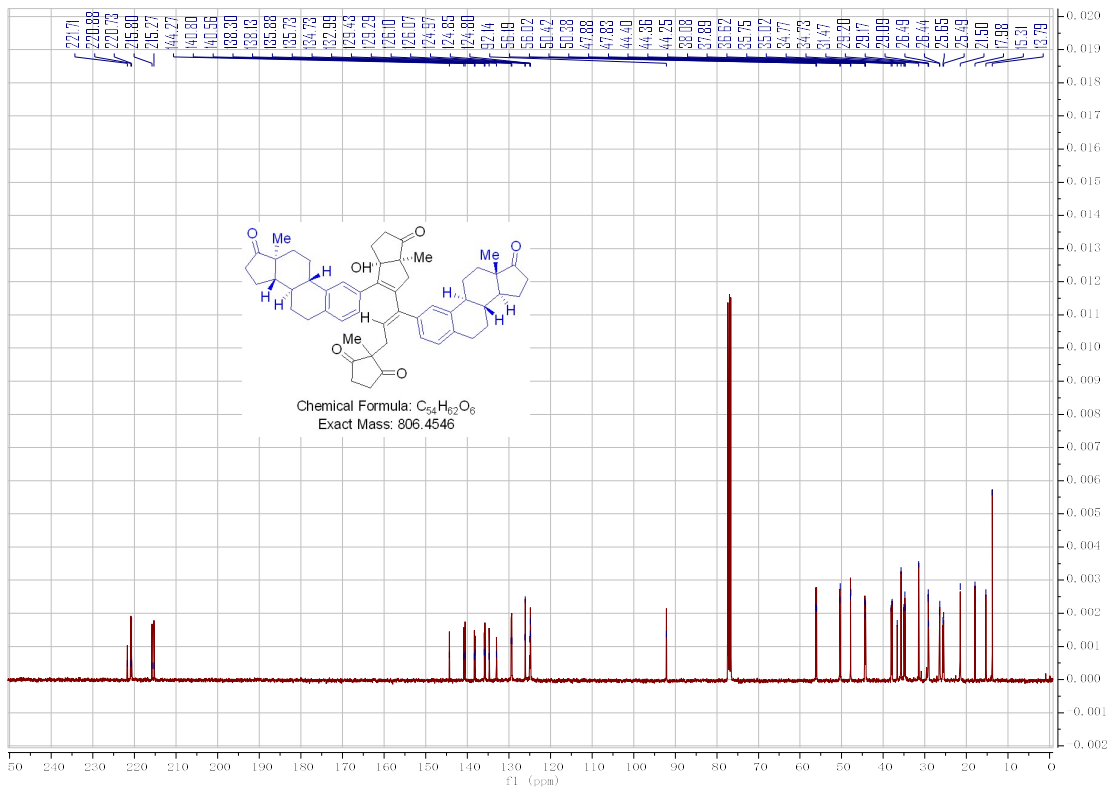

S195

3t

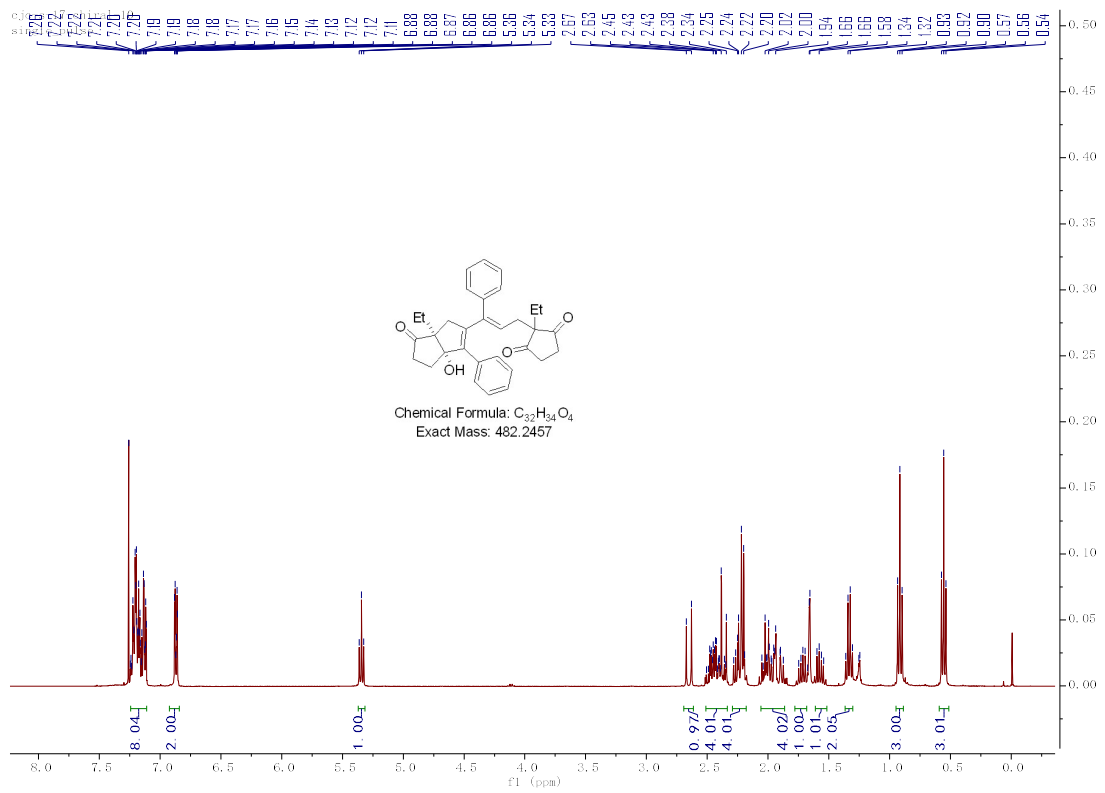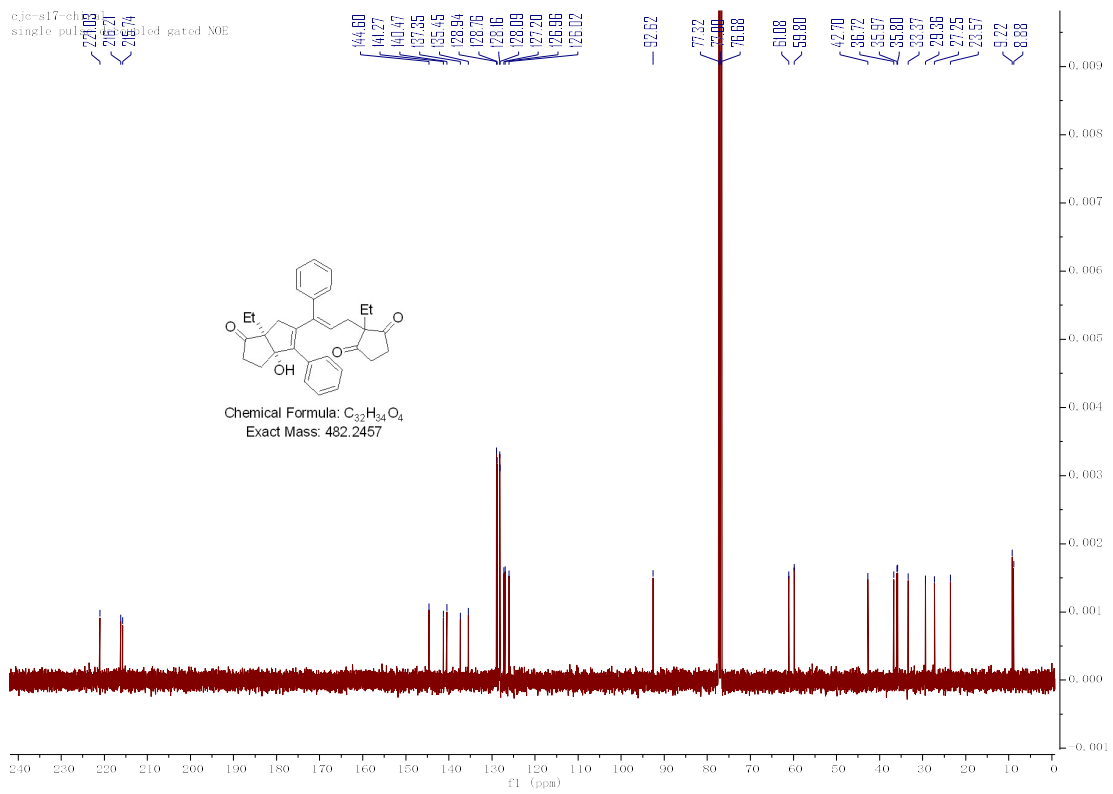

3u

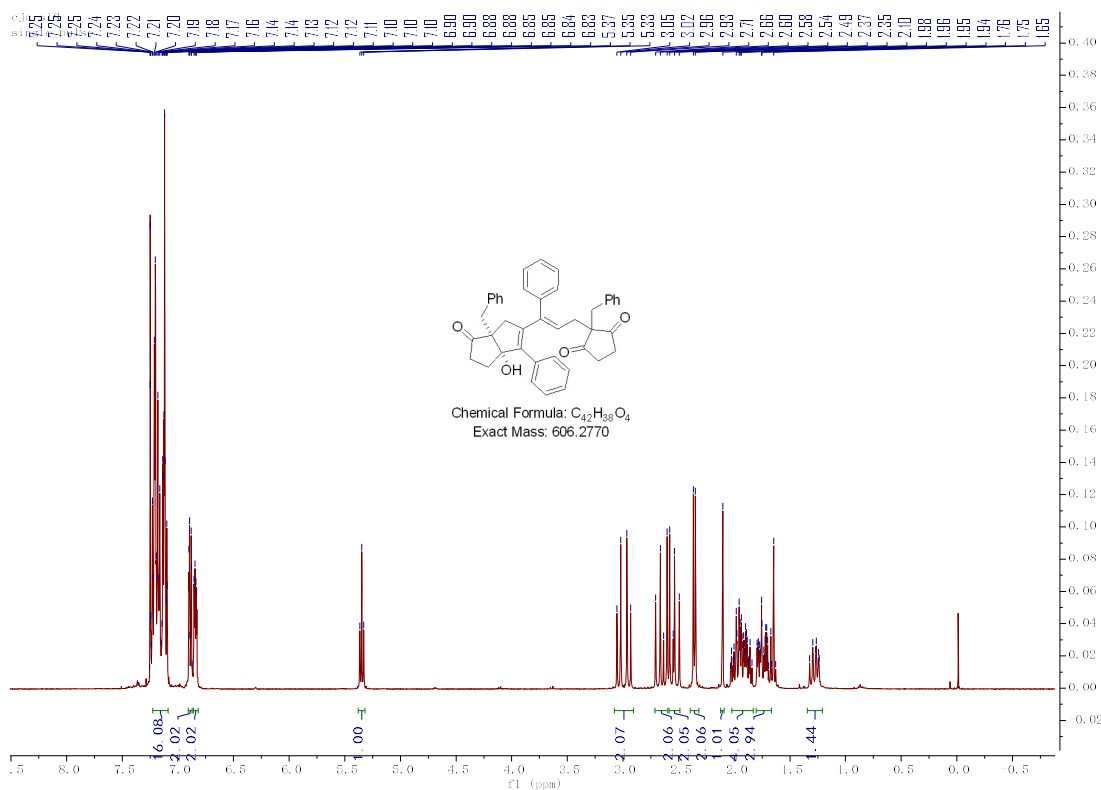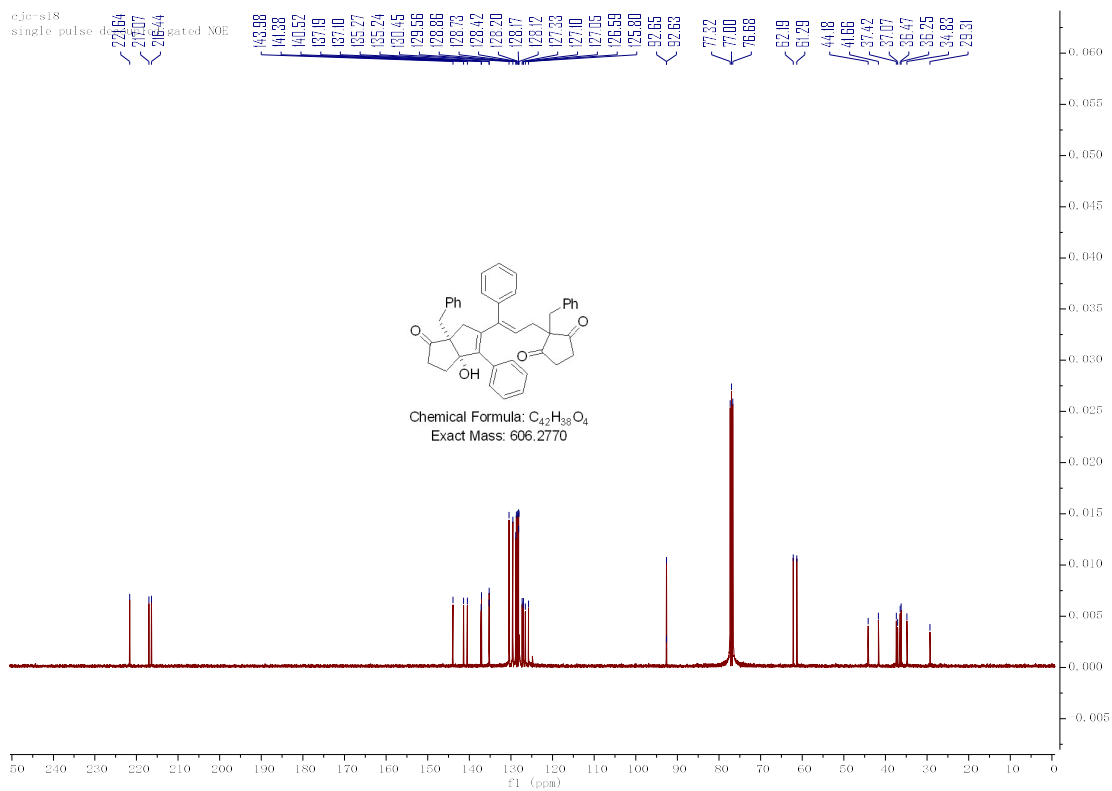

3v

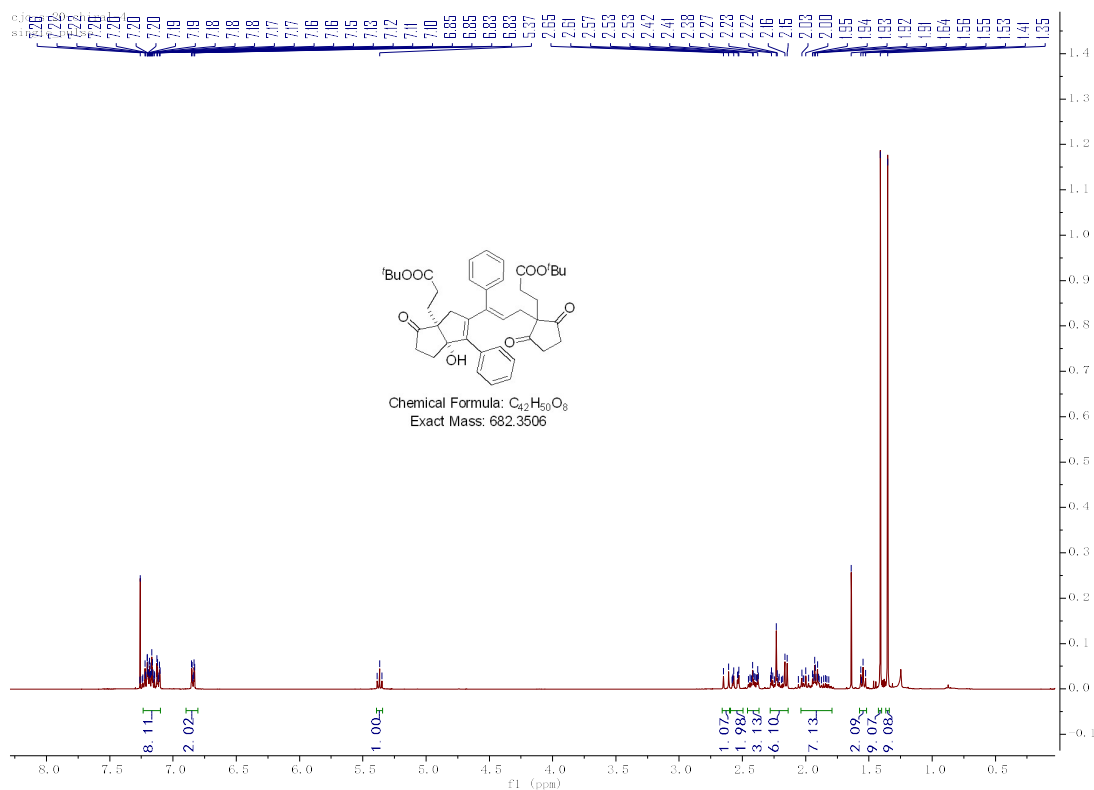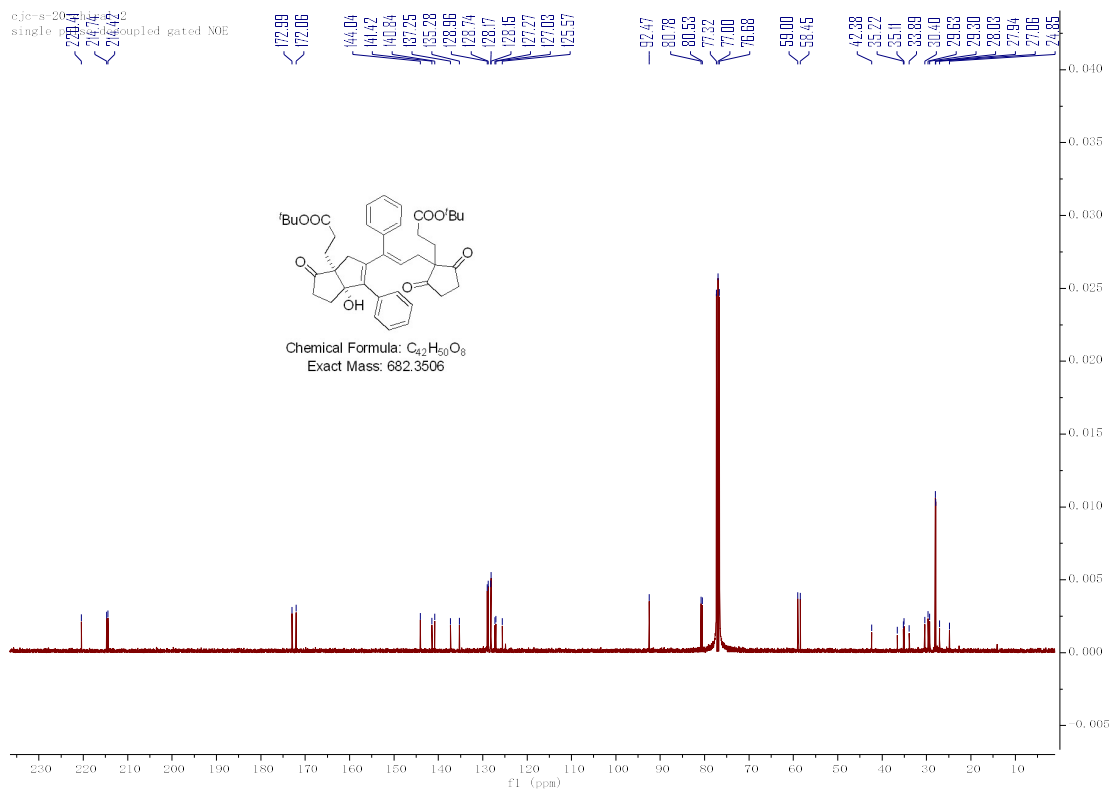

3w

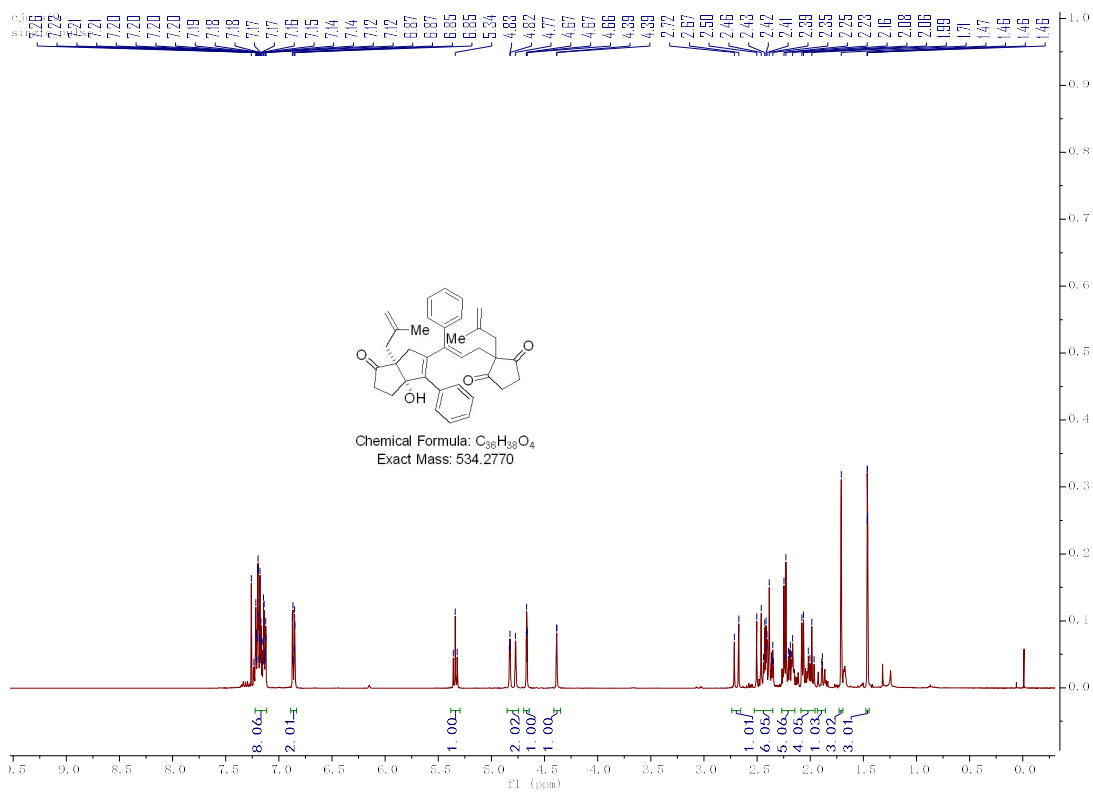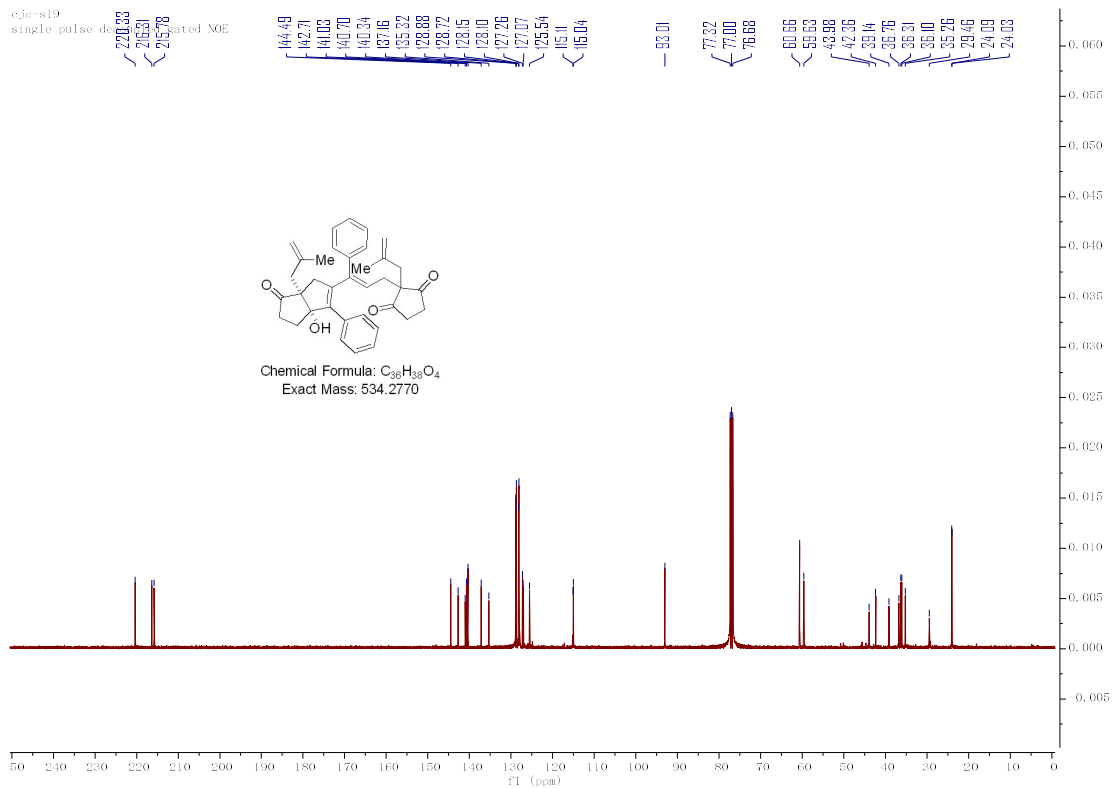

3x

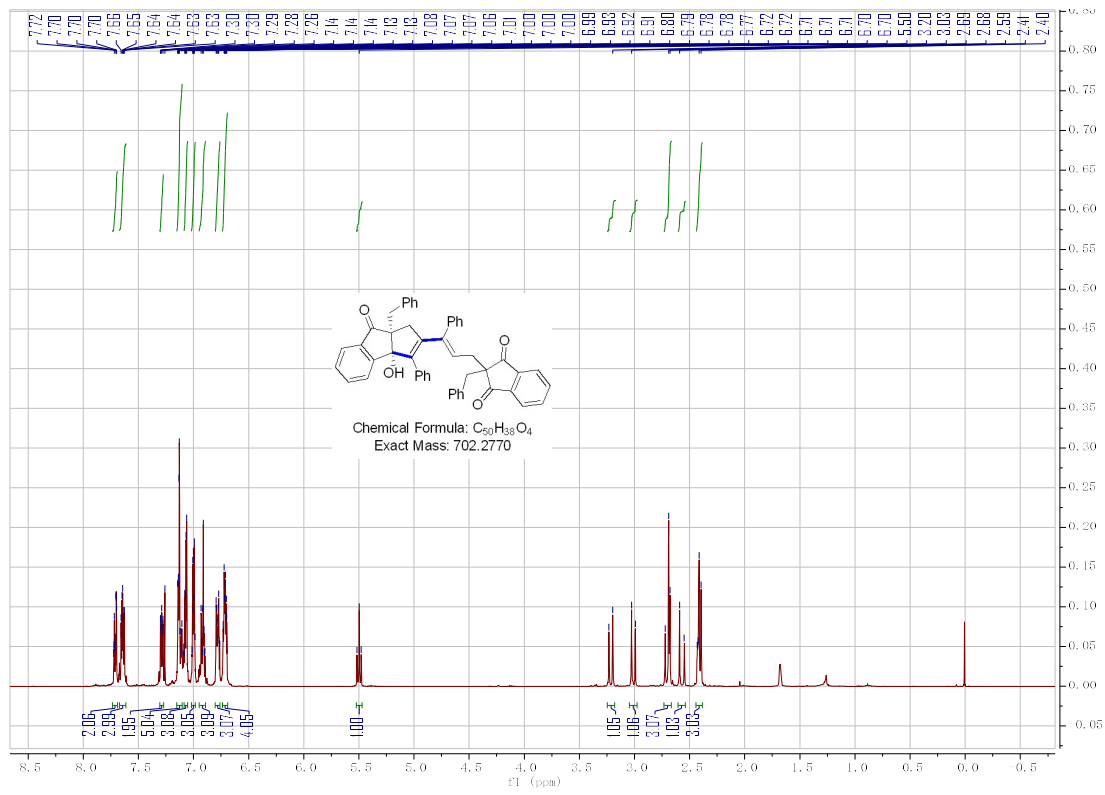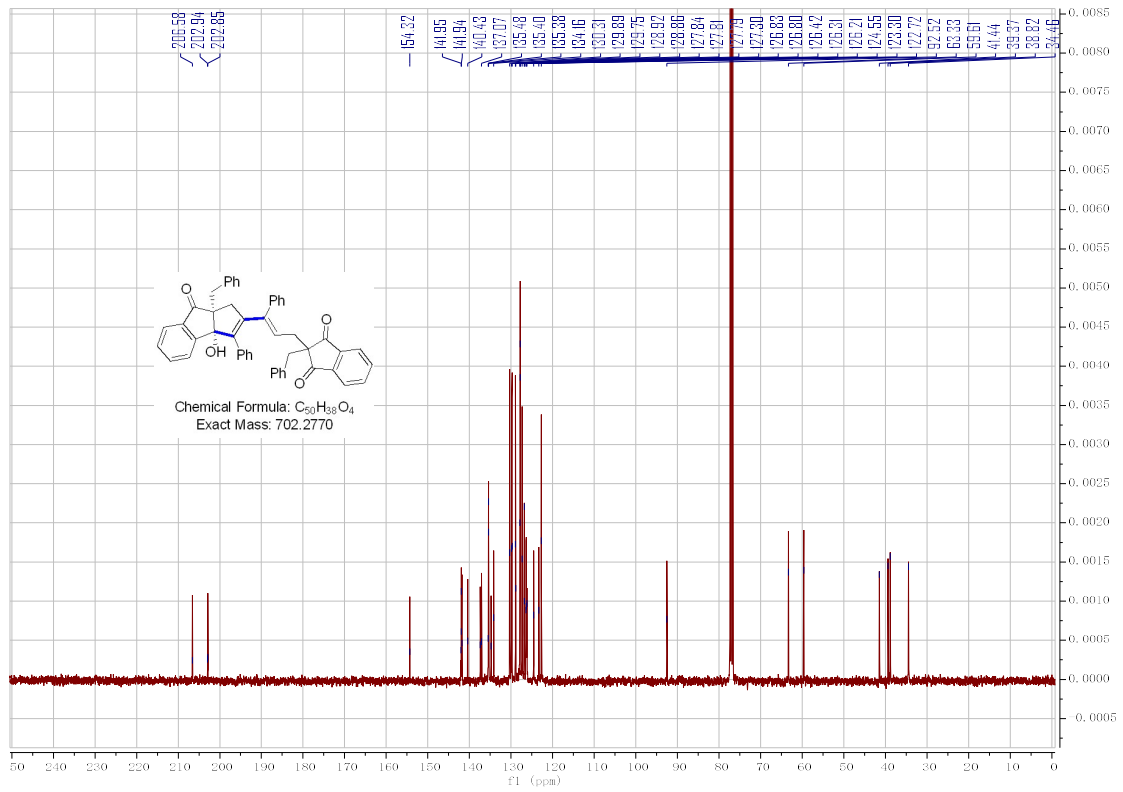

S200





# 5ba

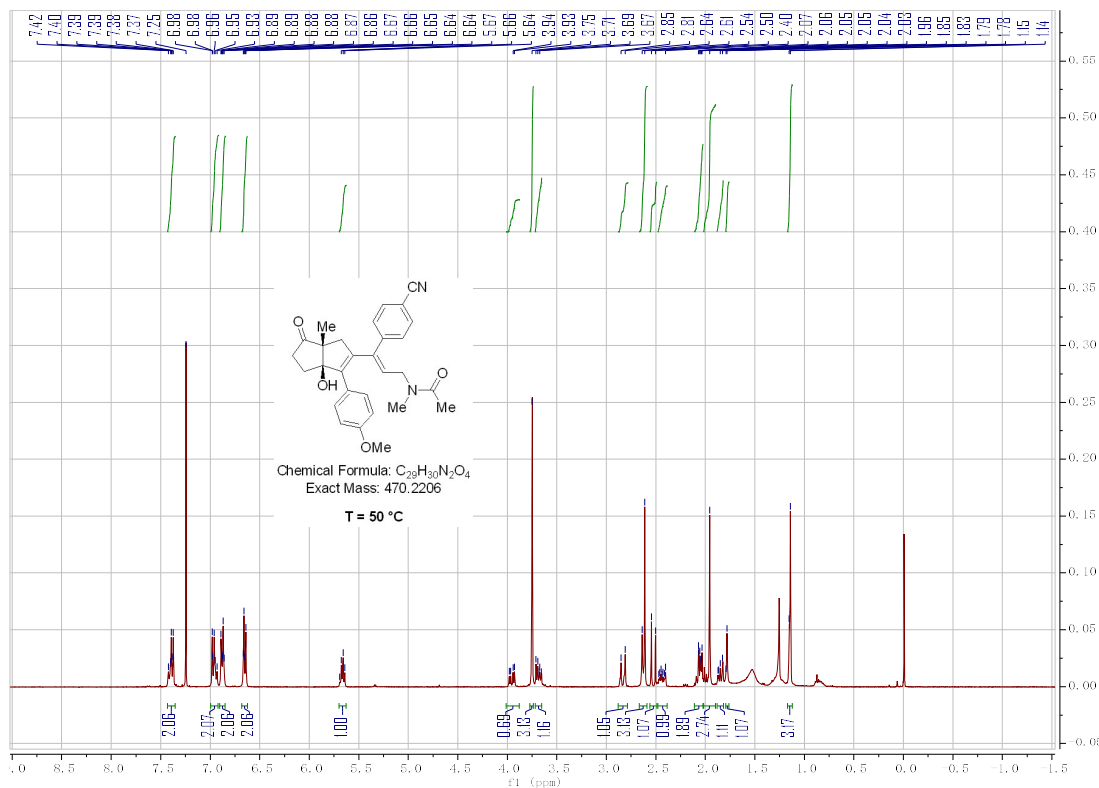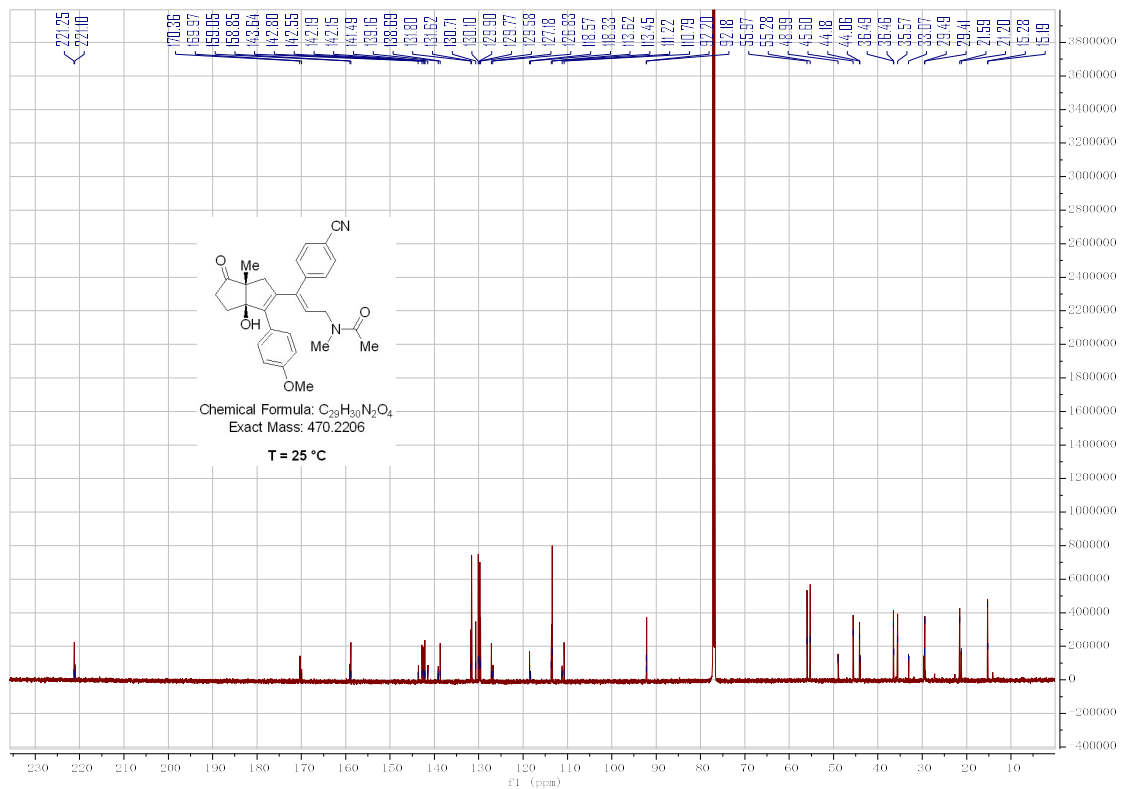

# 5bd

CHR-4-2.1.fid

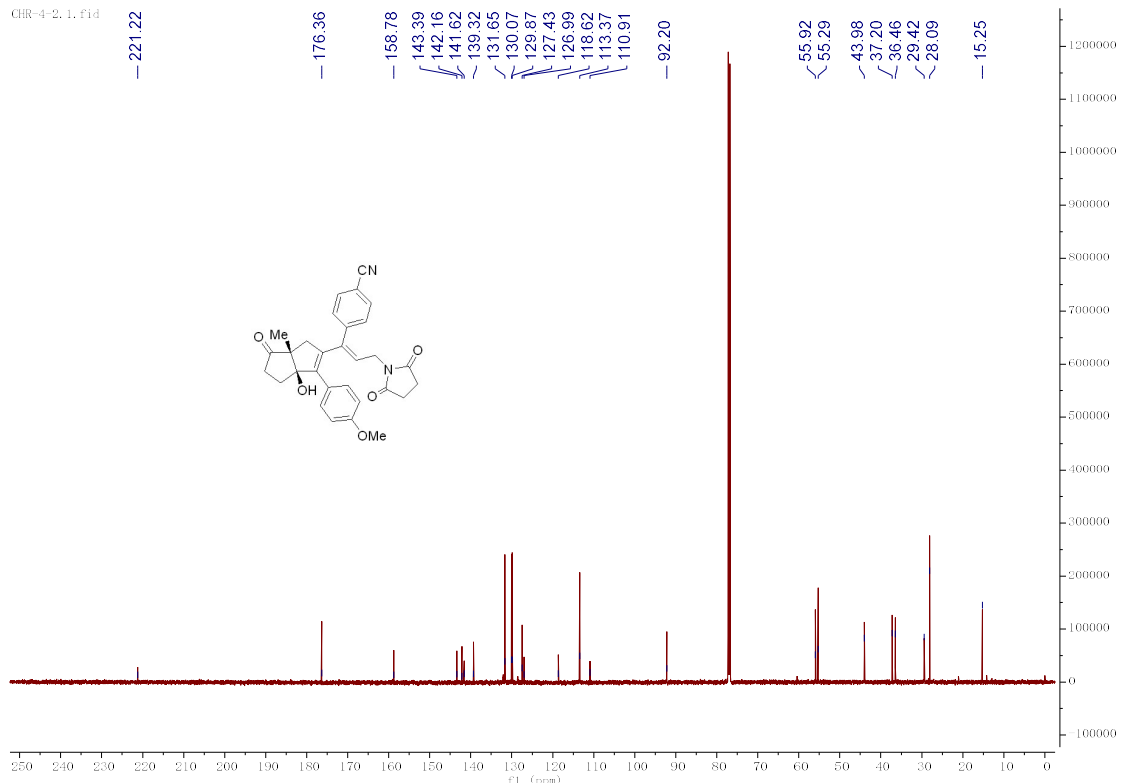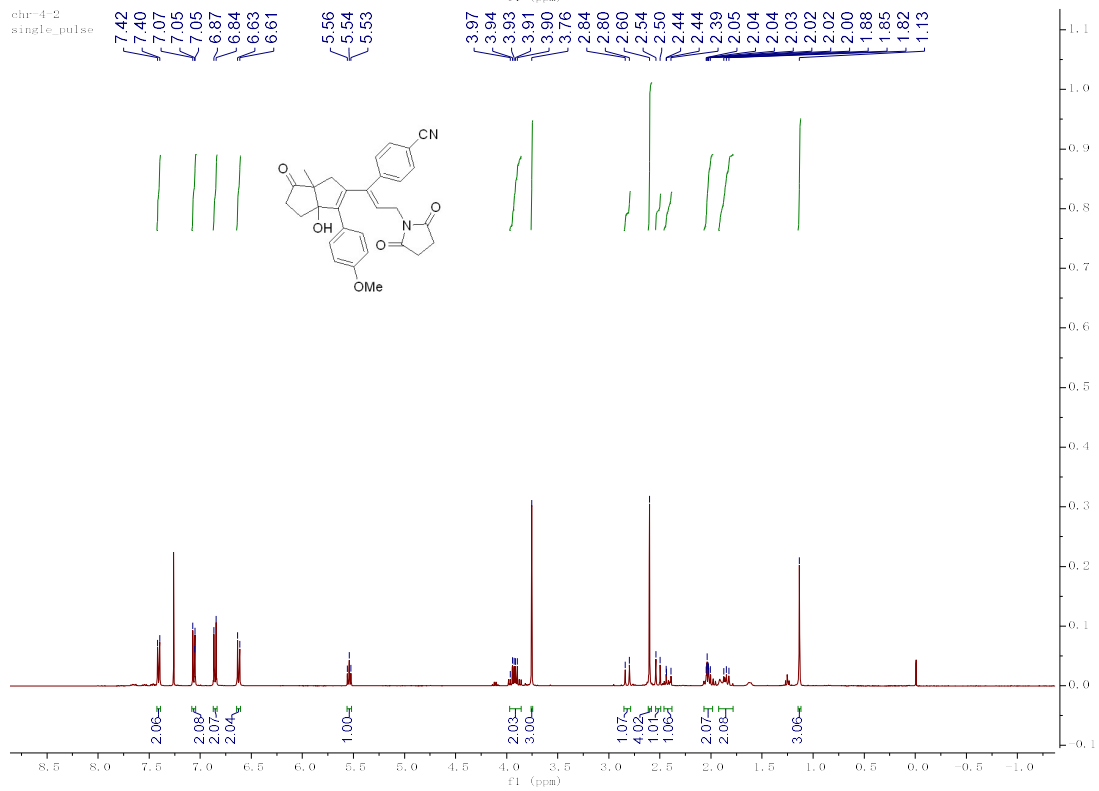

# 5be

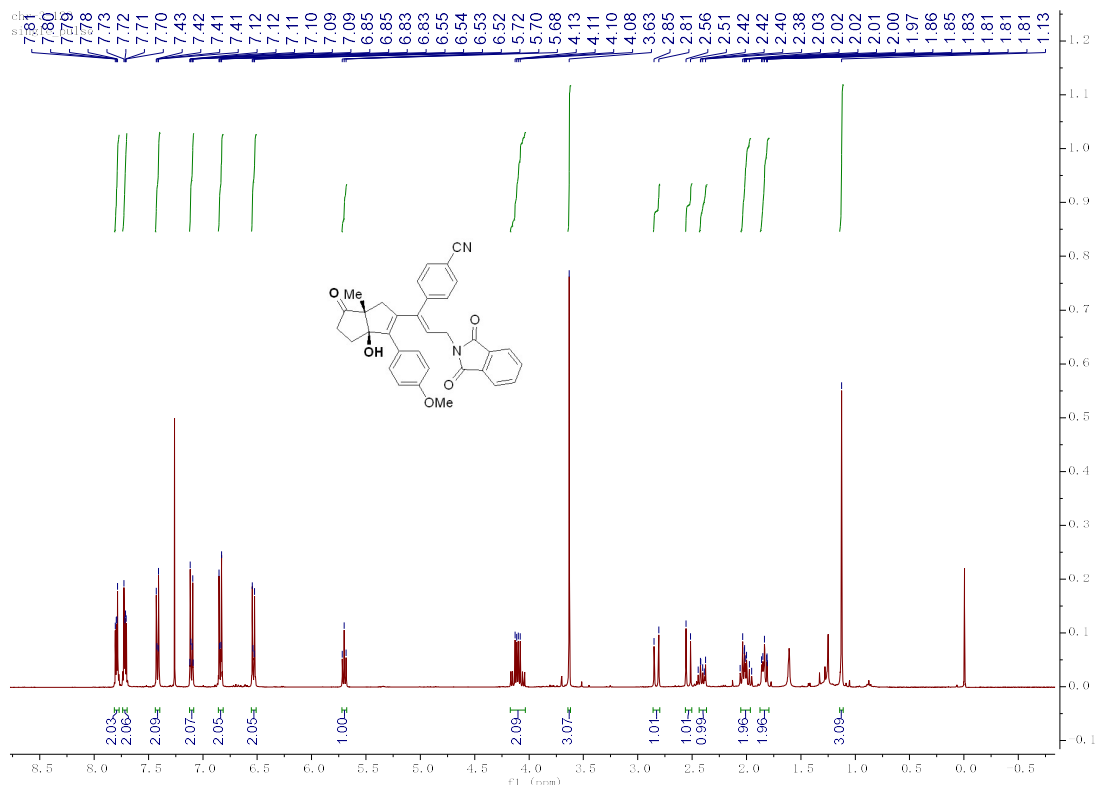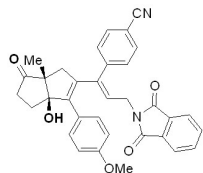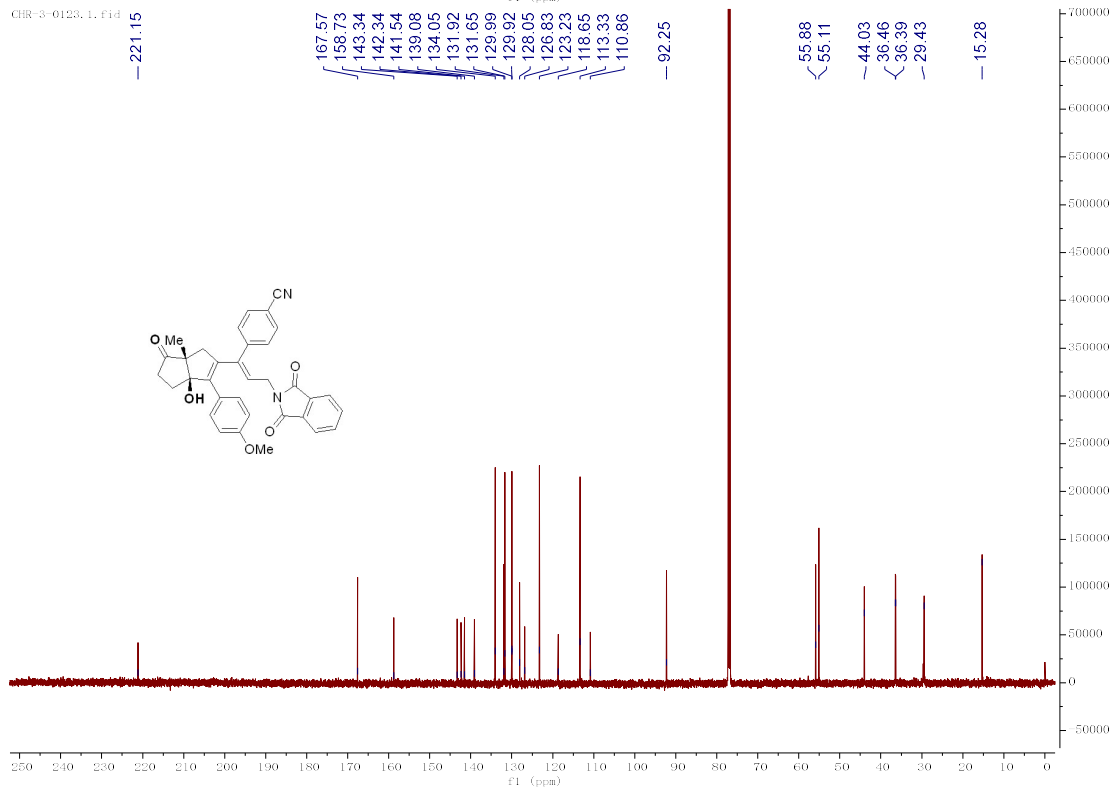

# 5bf

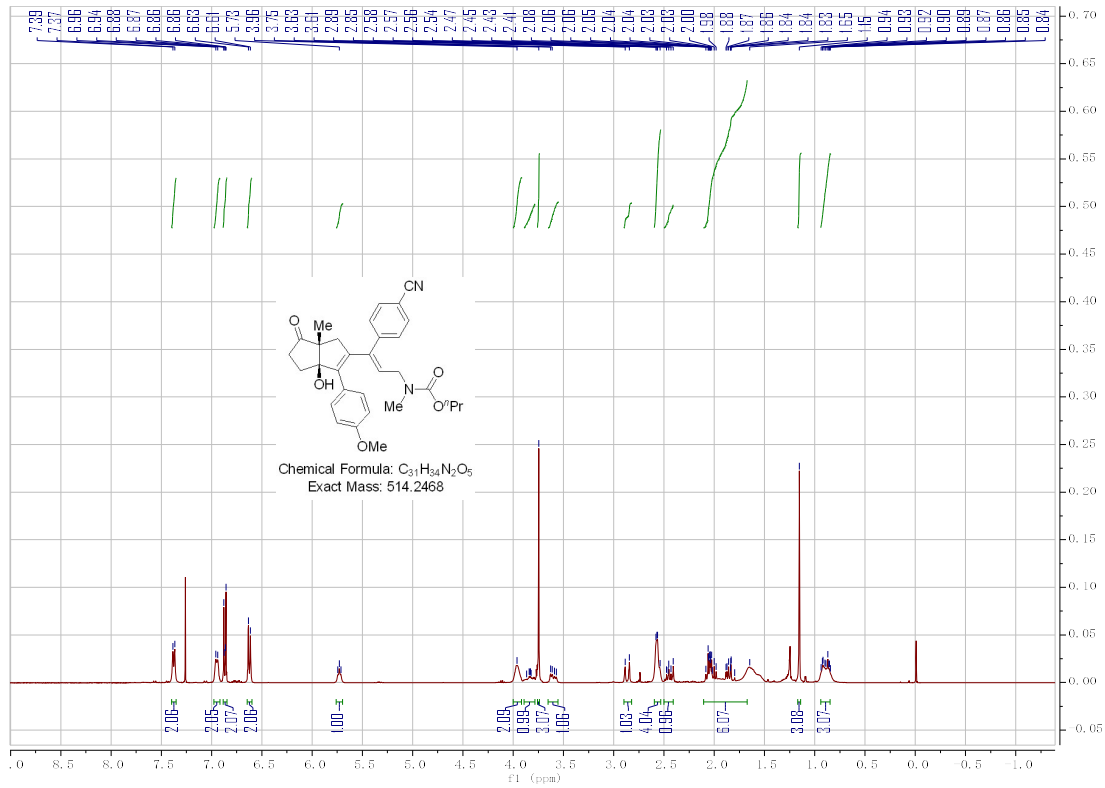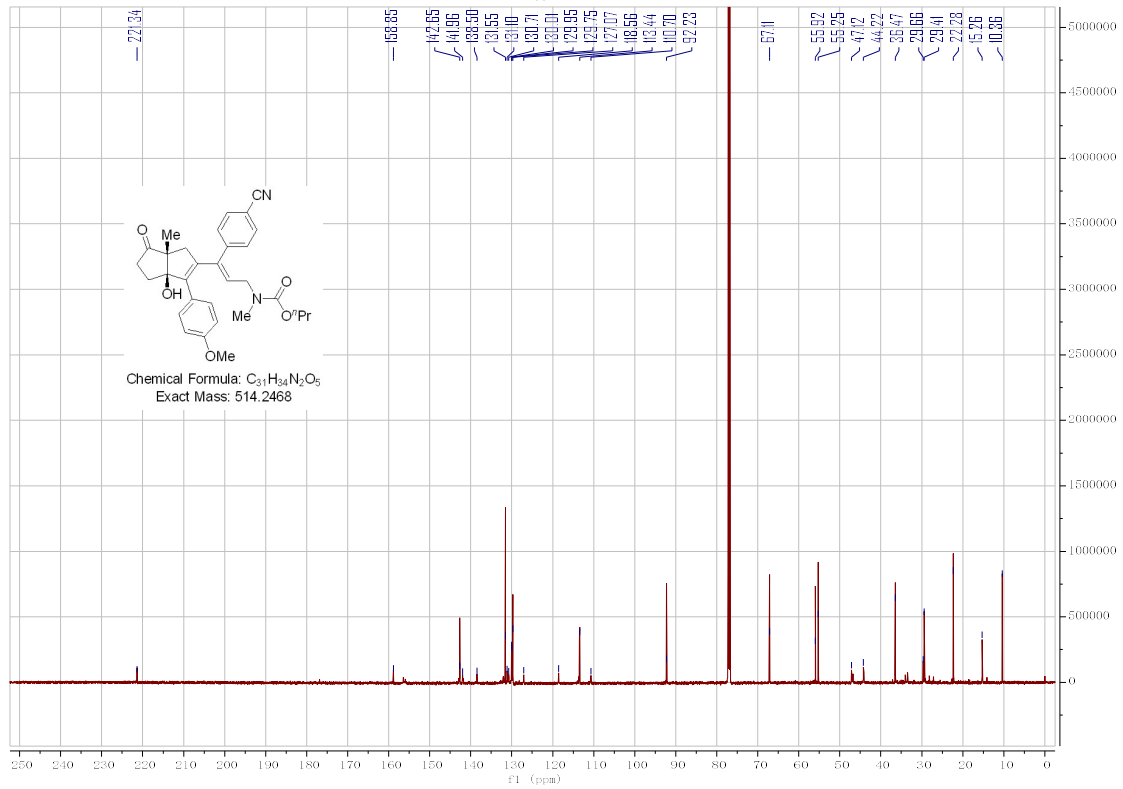

# 5bg

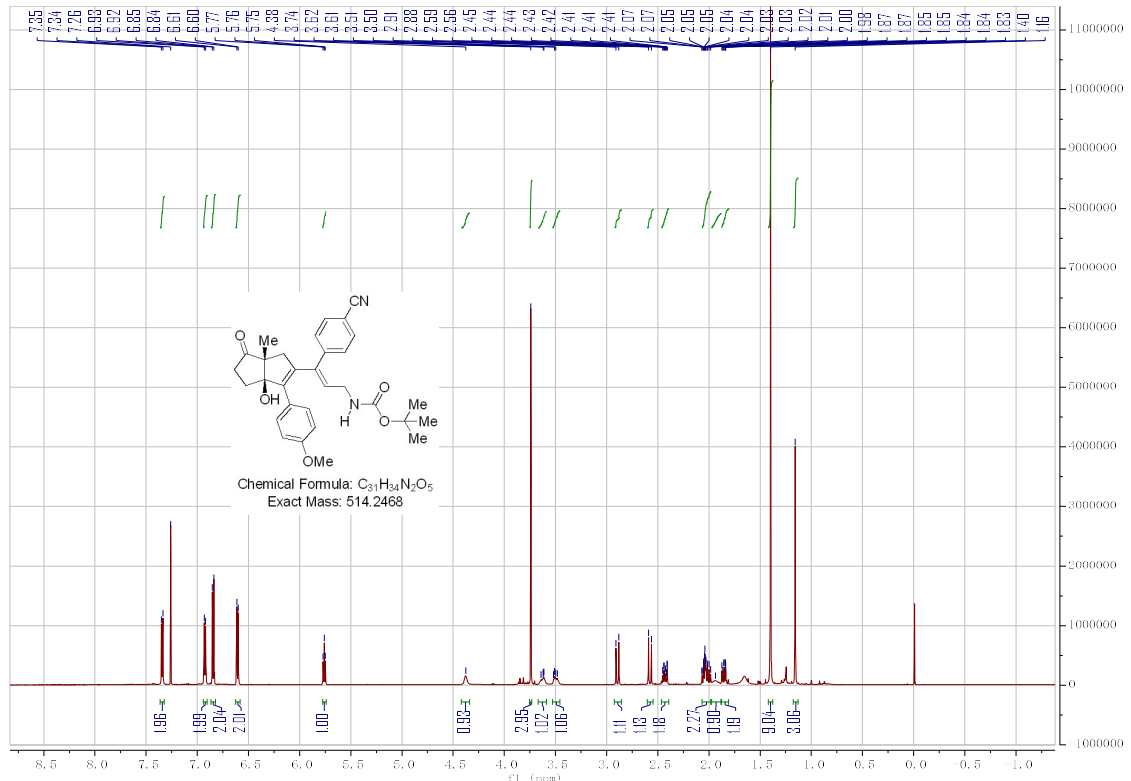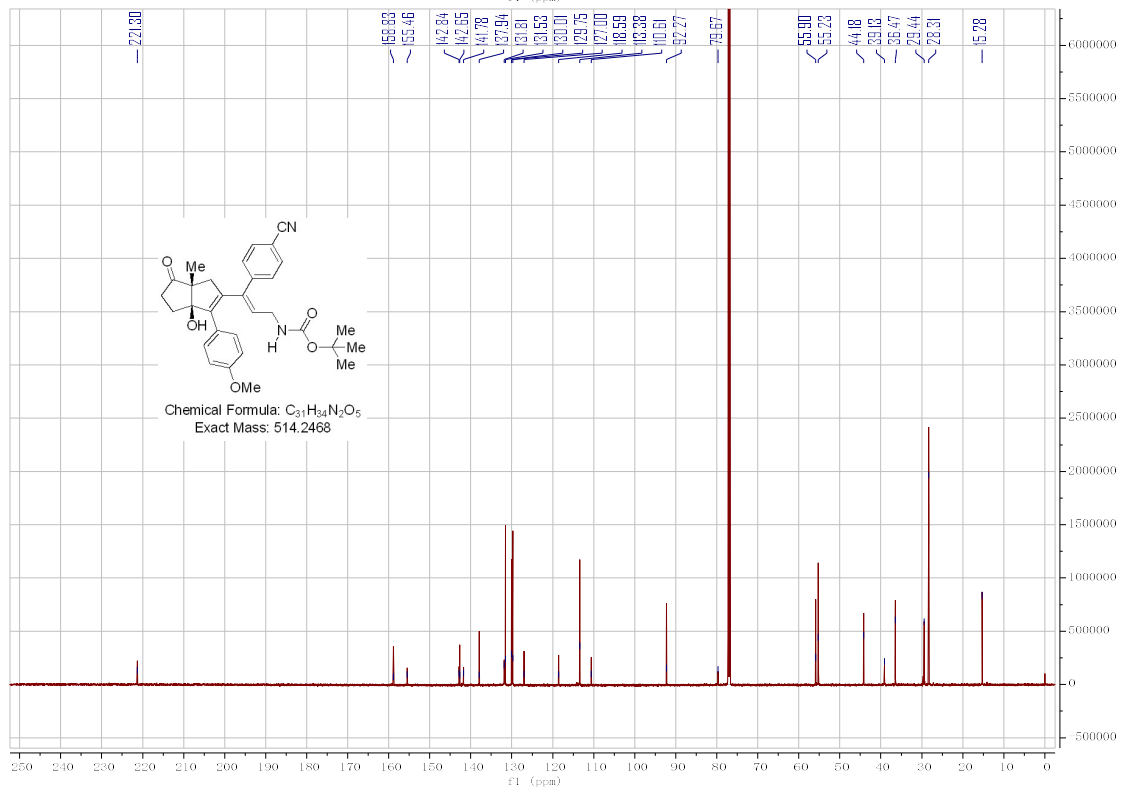

# 5bh

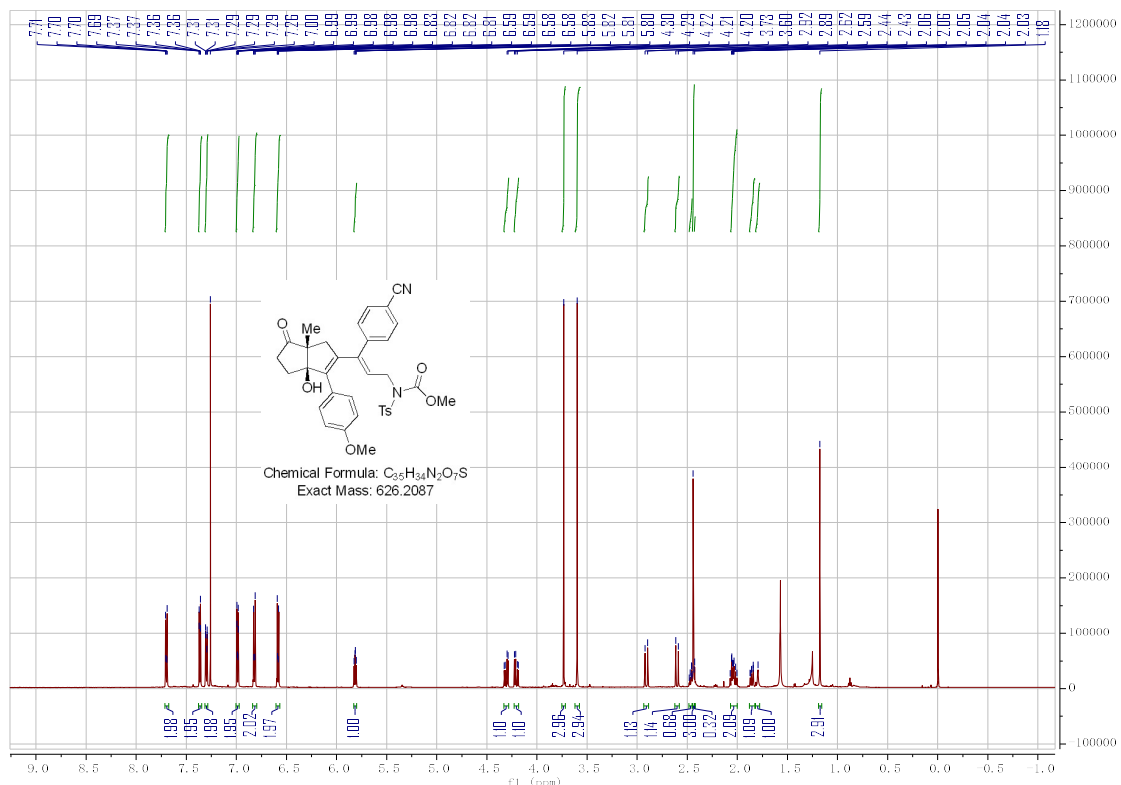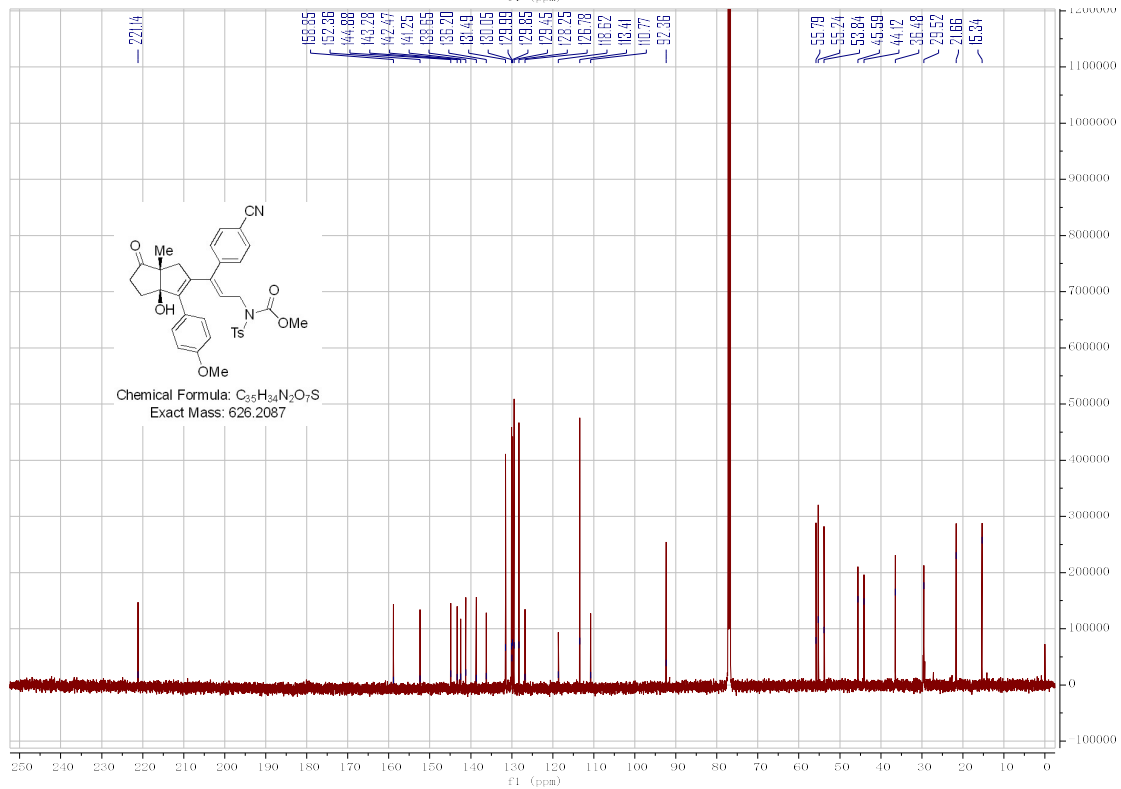

# 5bi

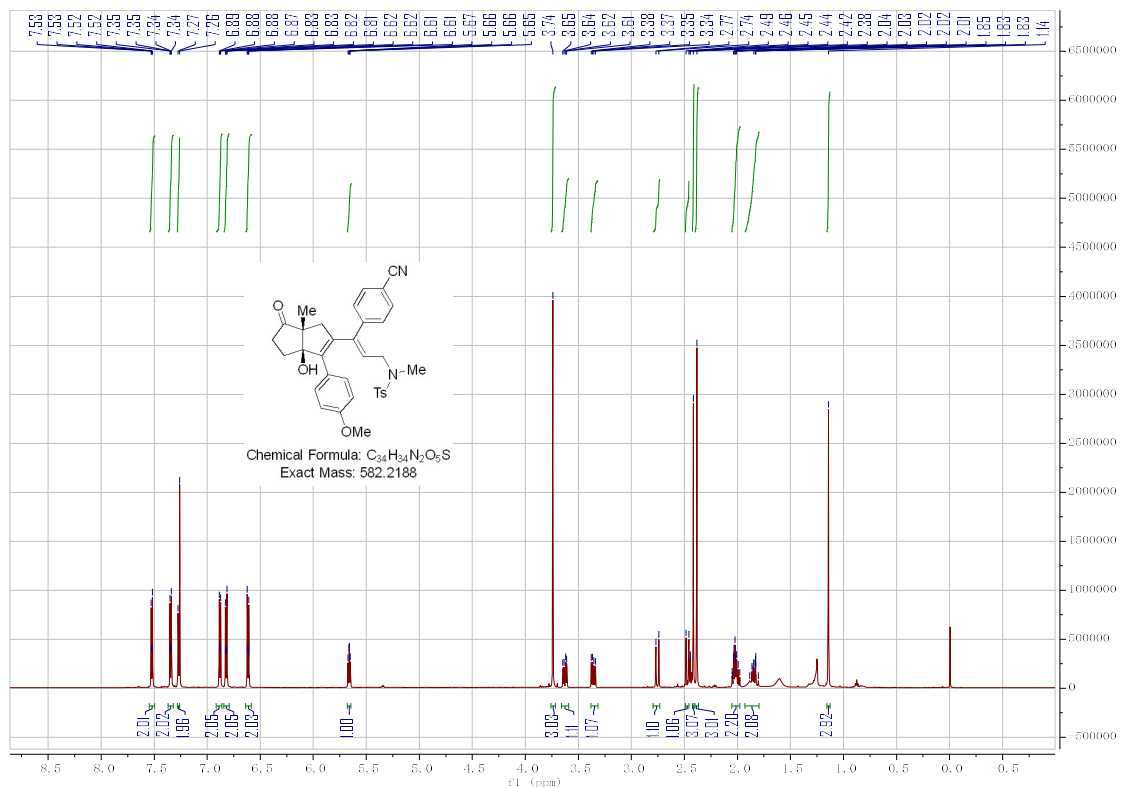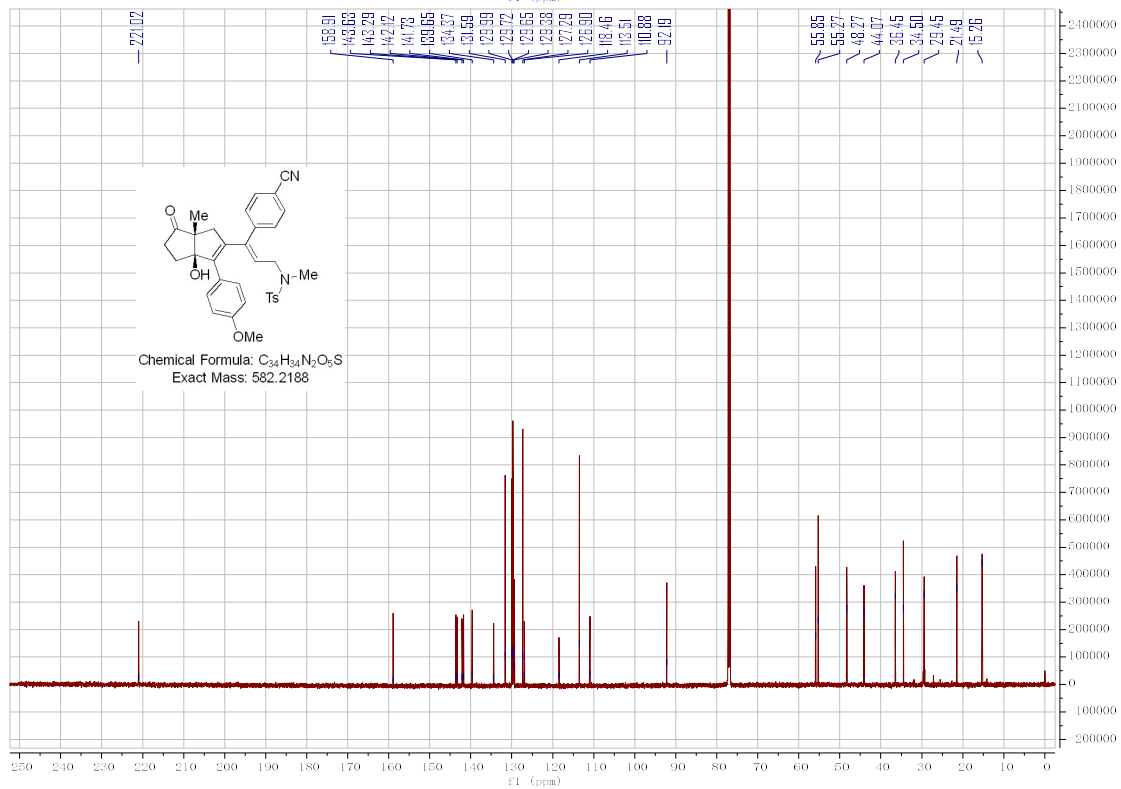



# 5bi'

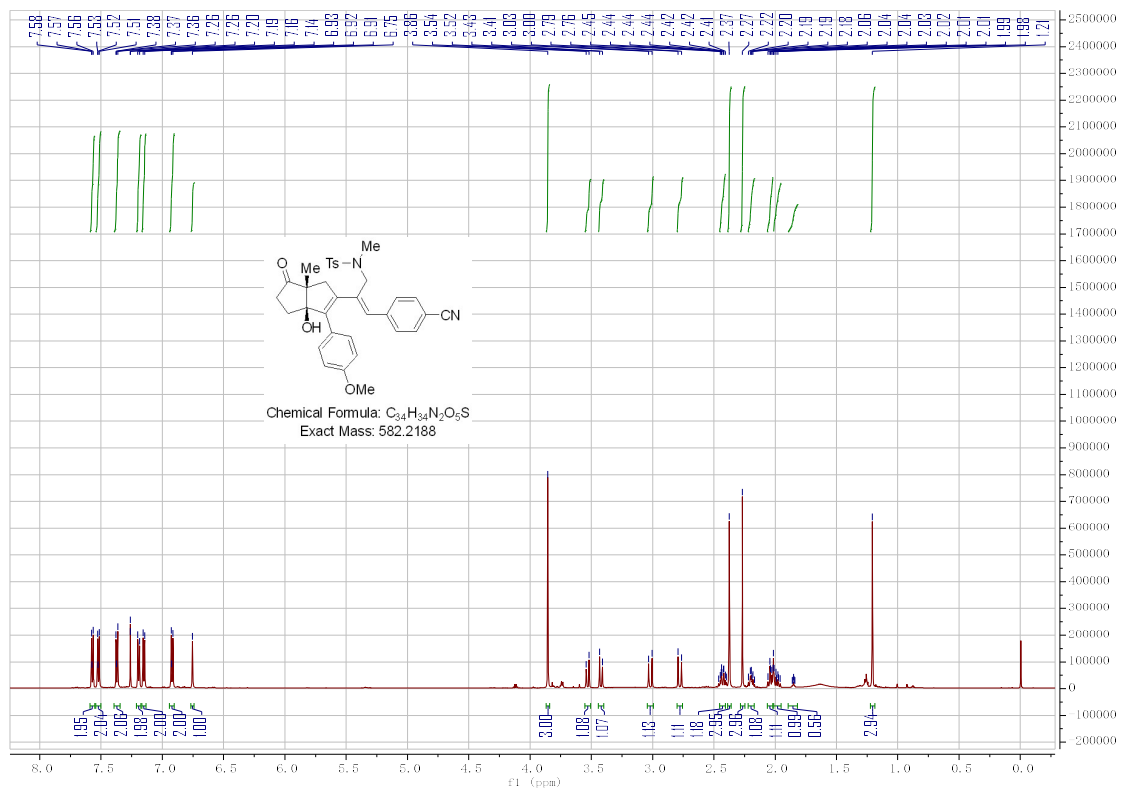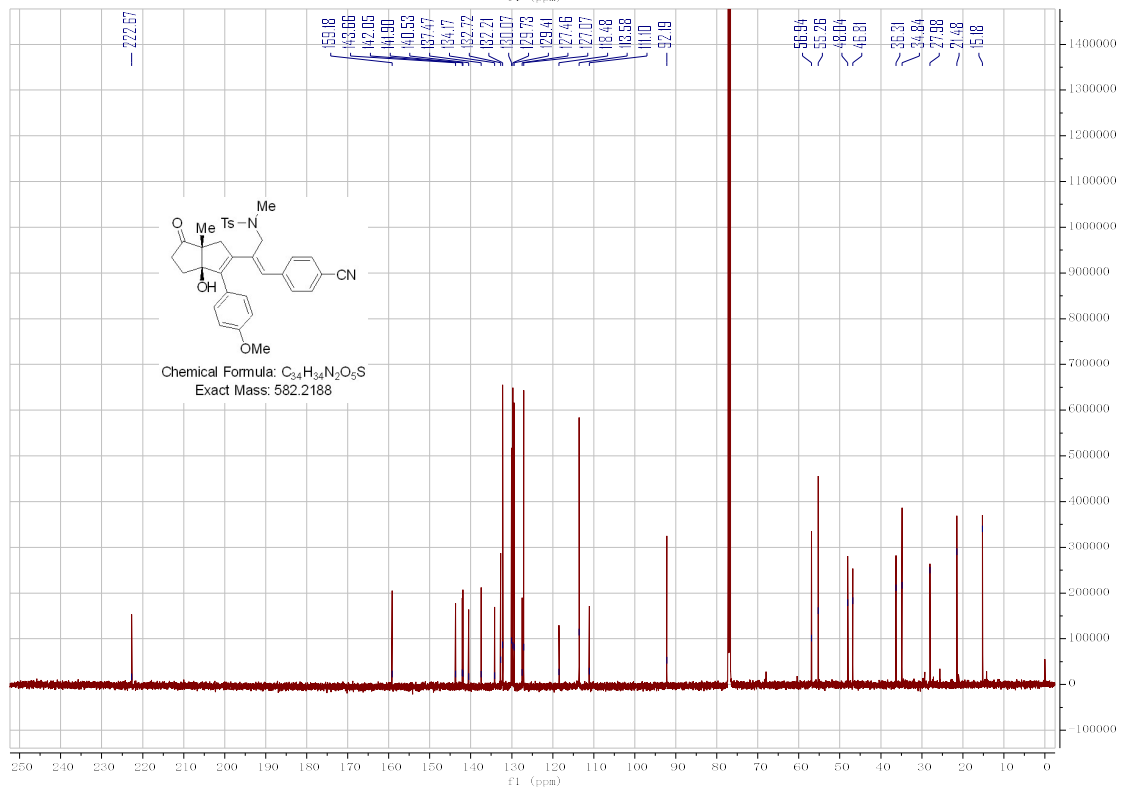

5bj

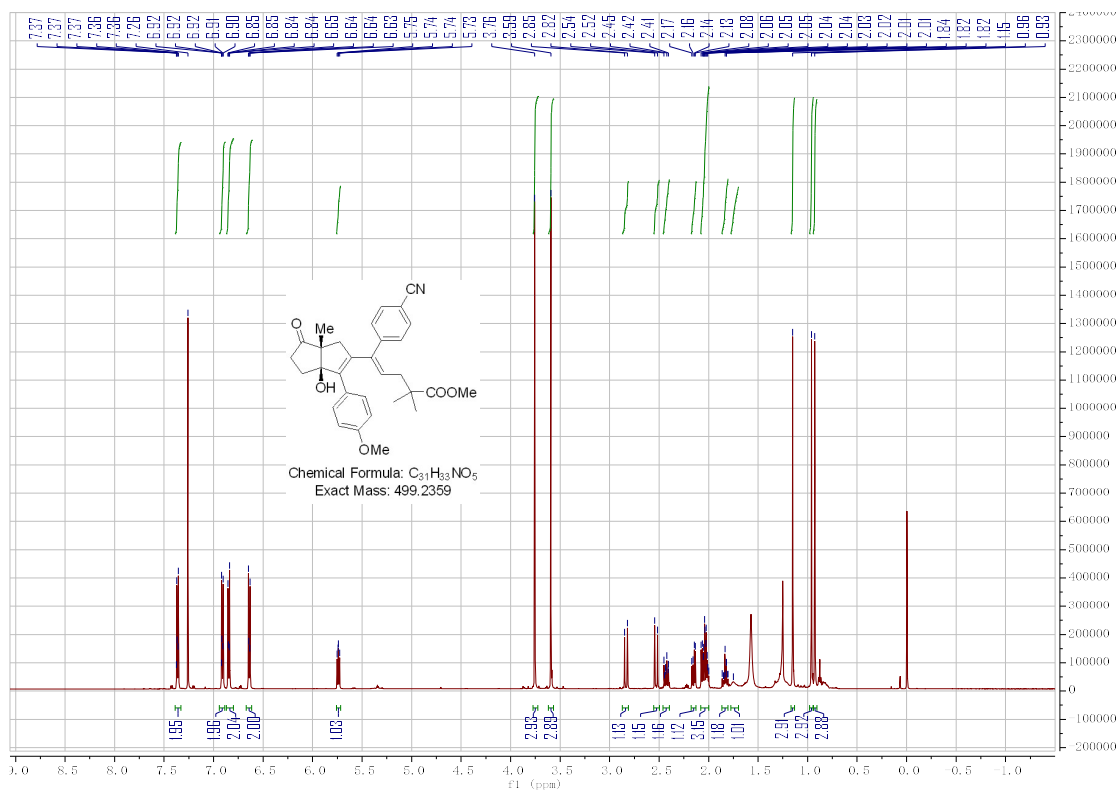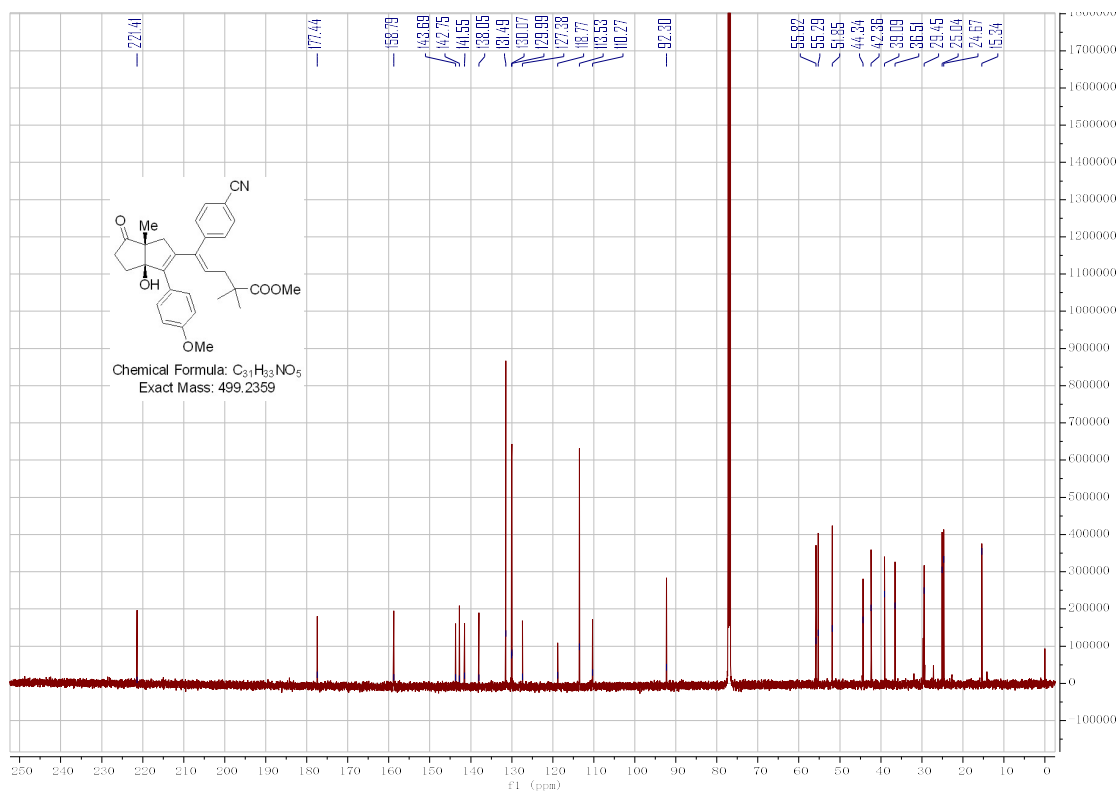

# 5bk

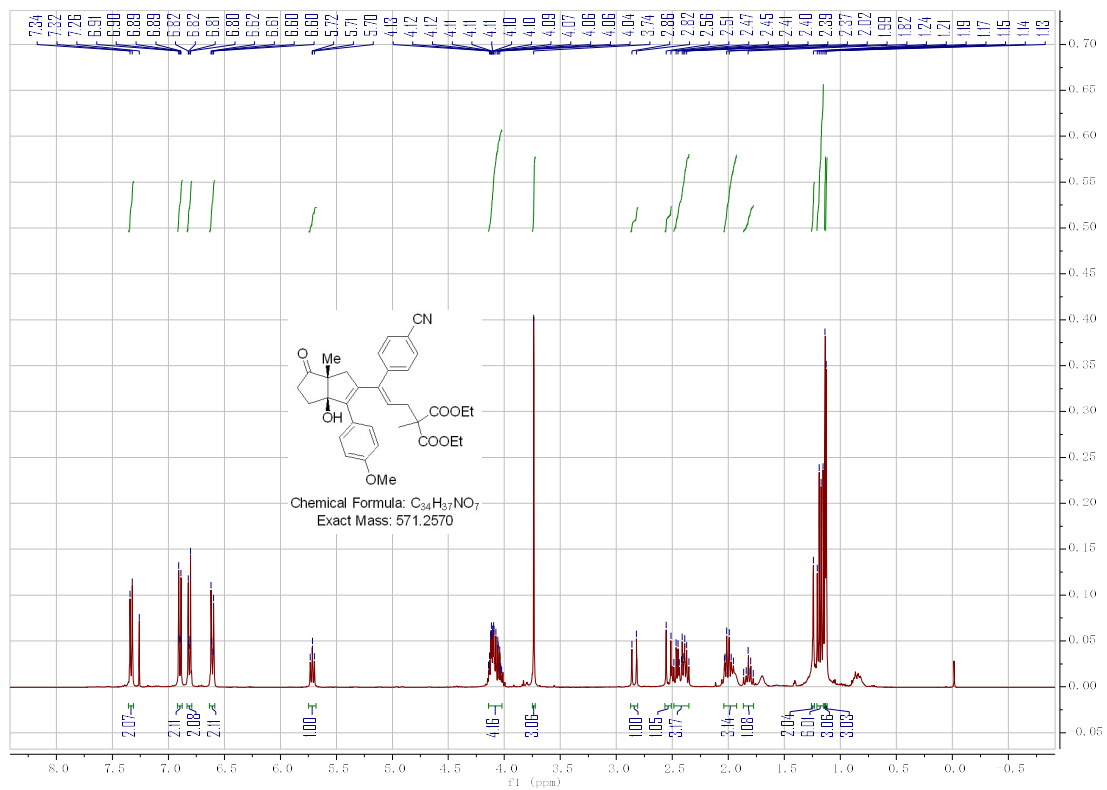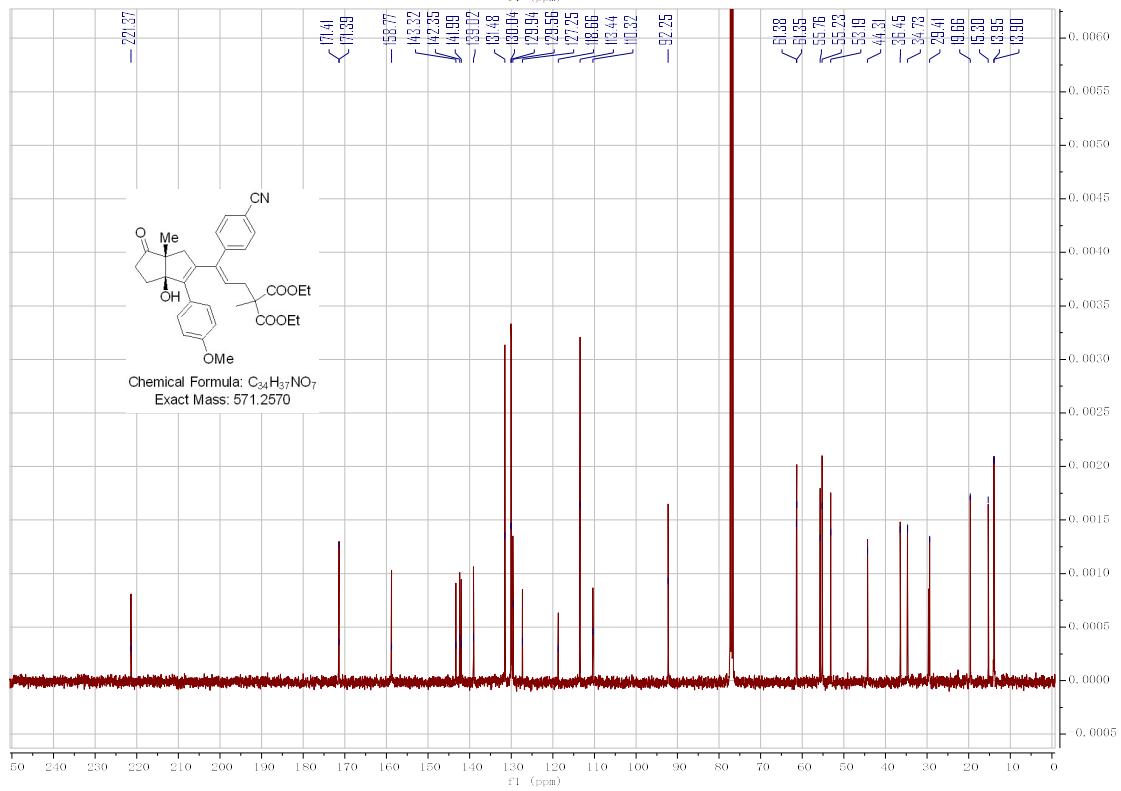

# 5bl

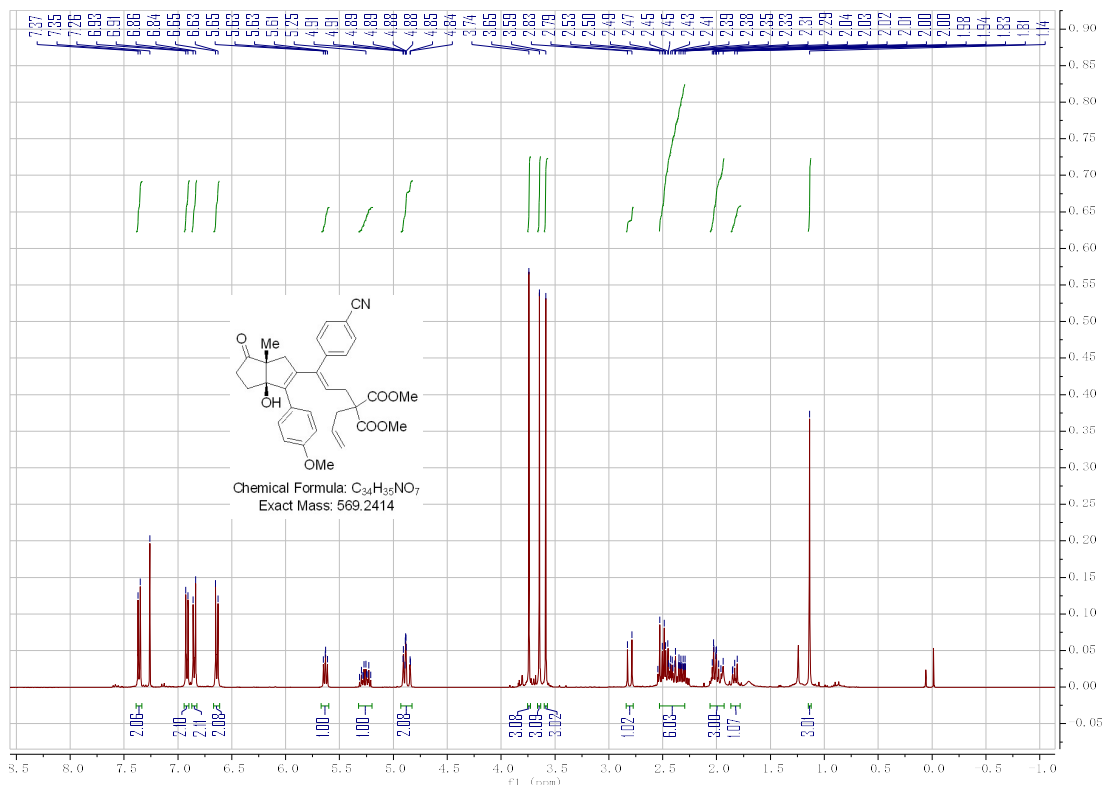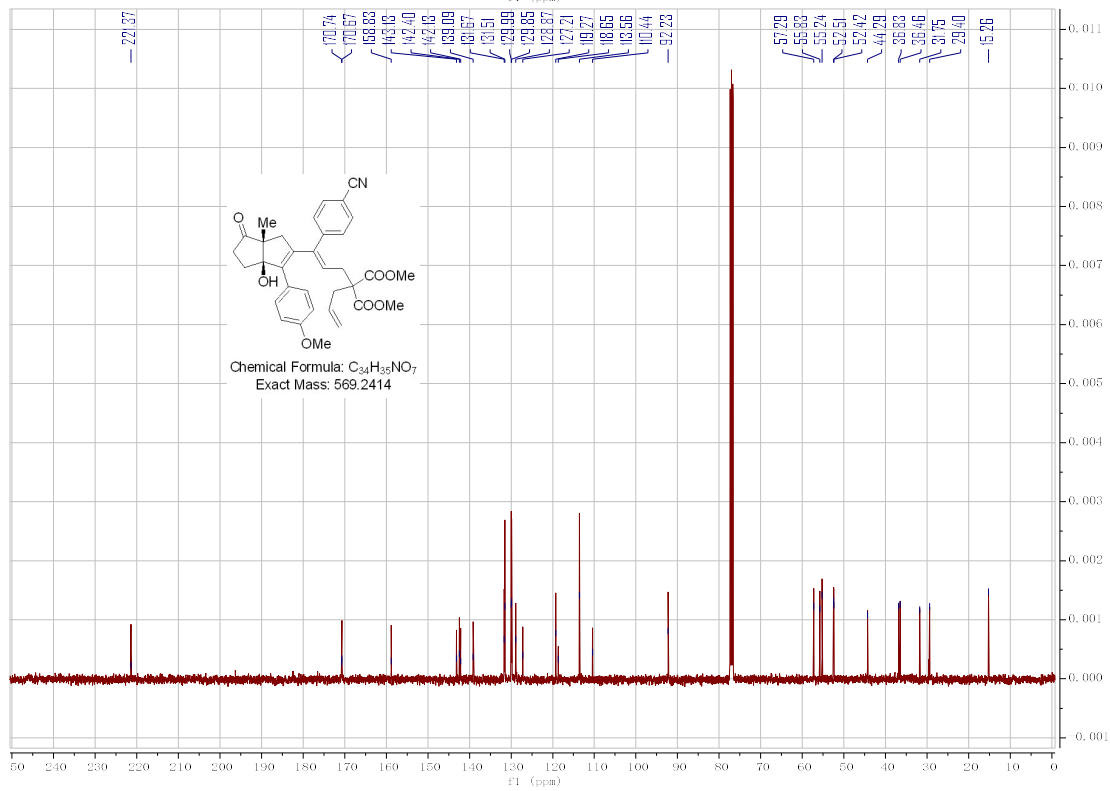

# 5bm

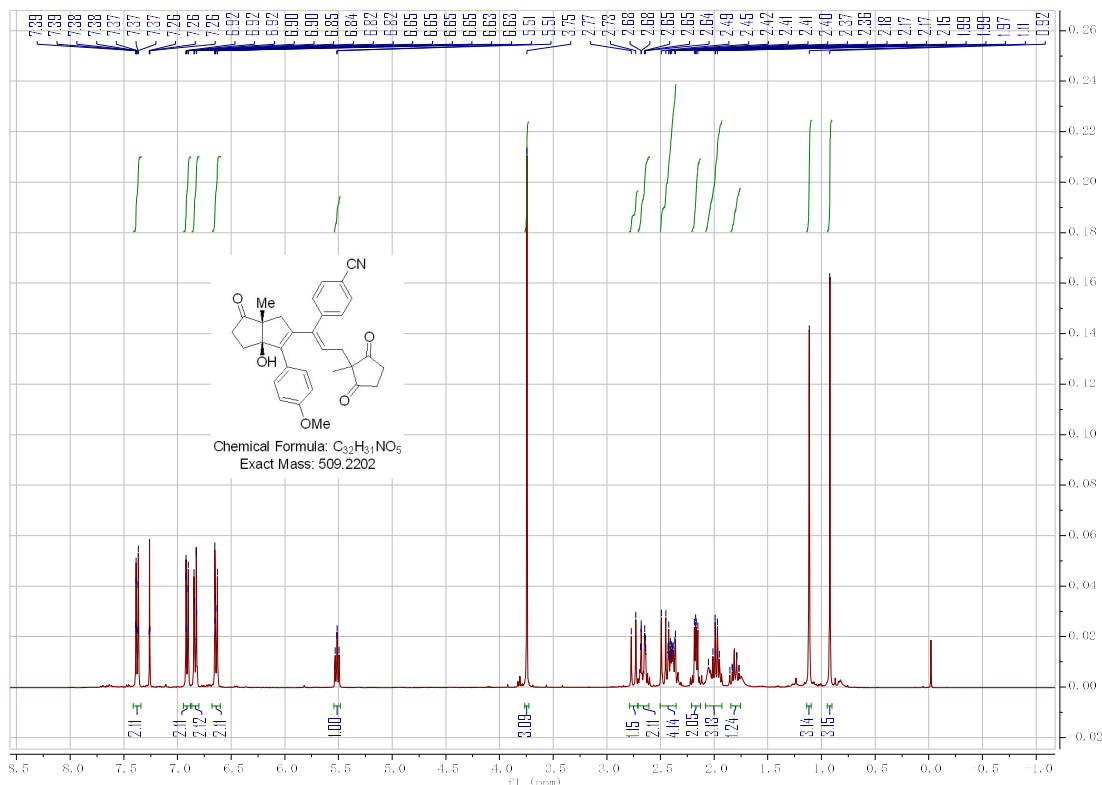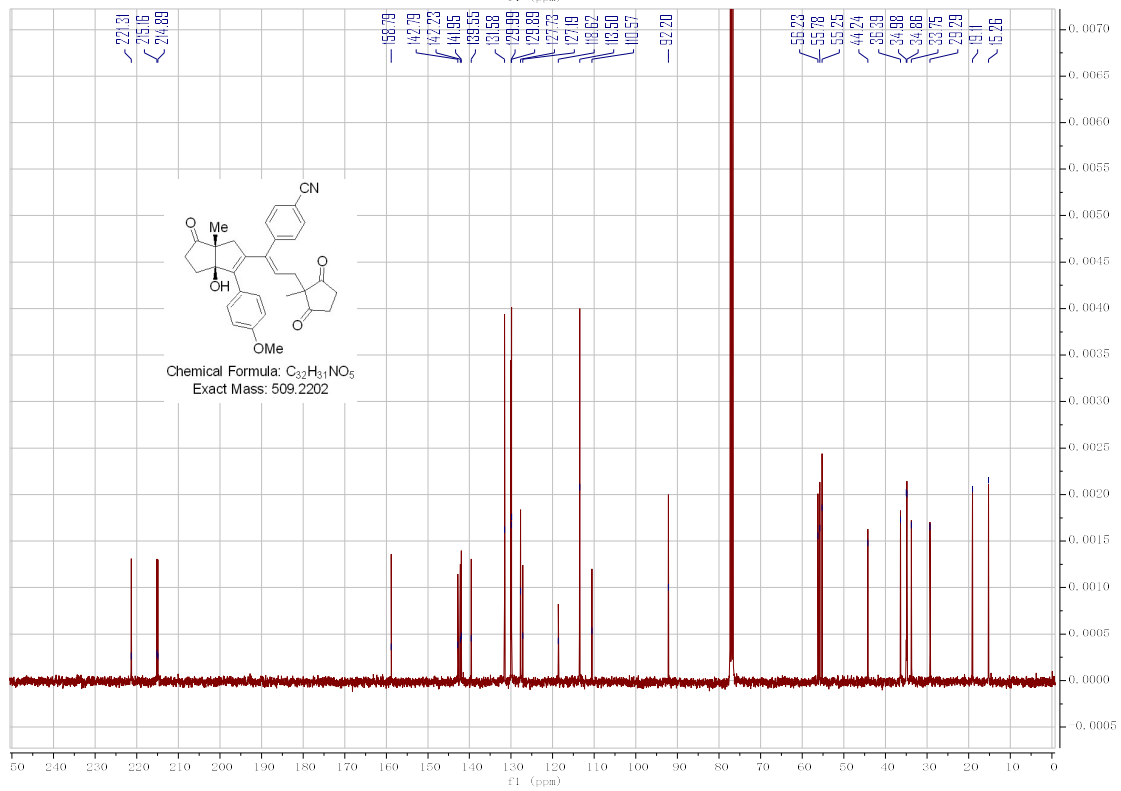

### 5an

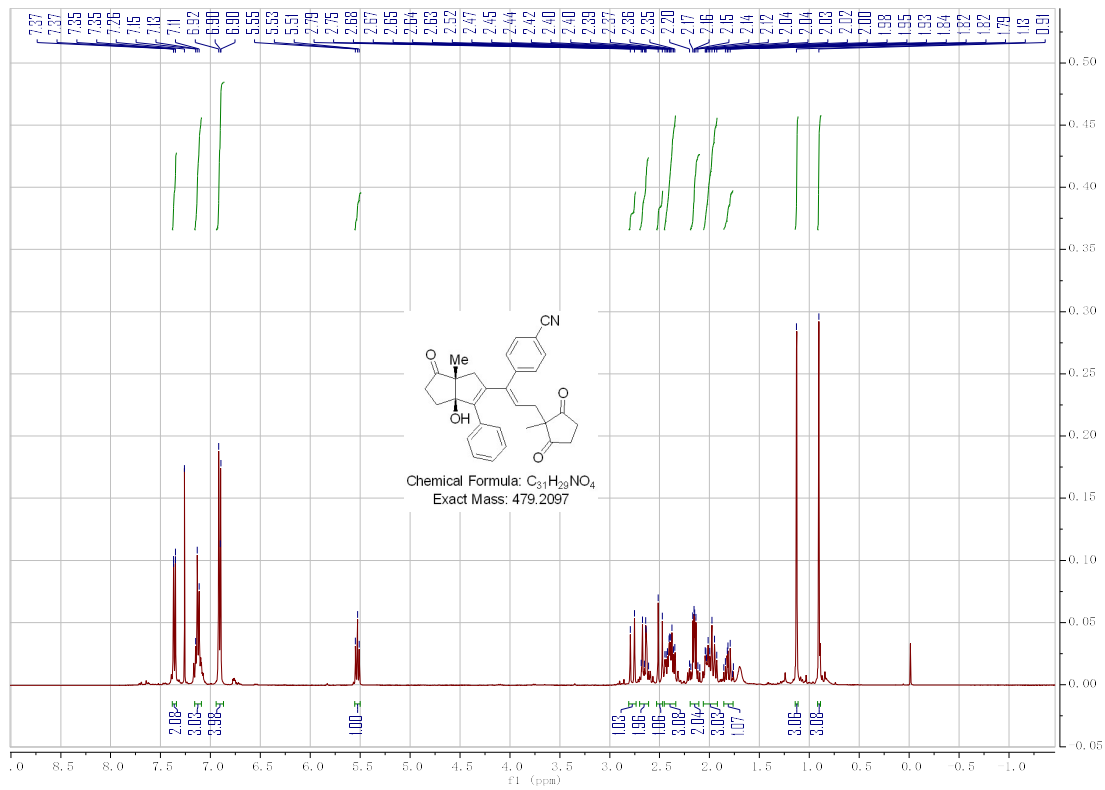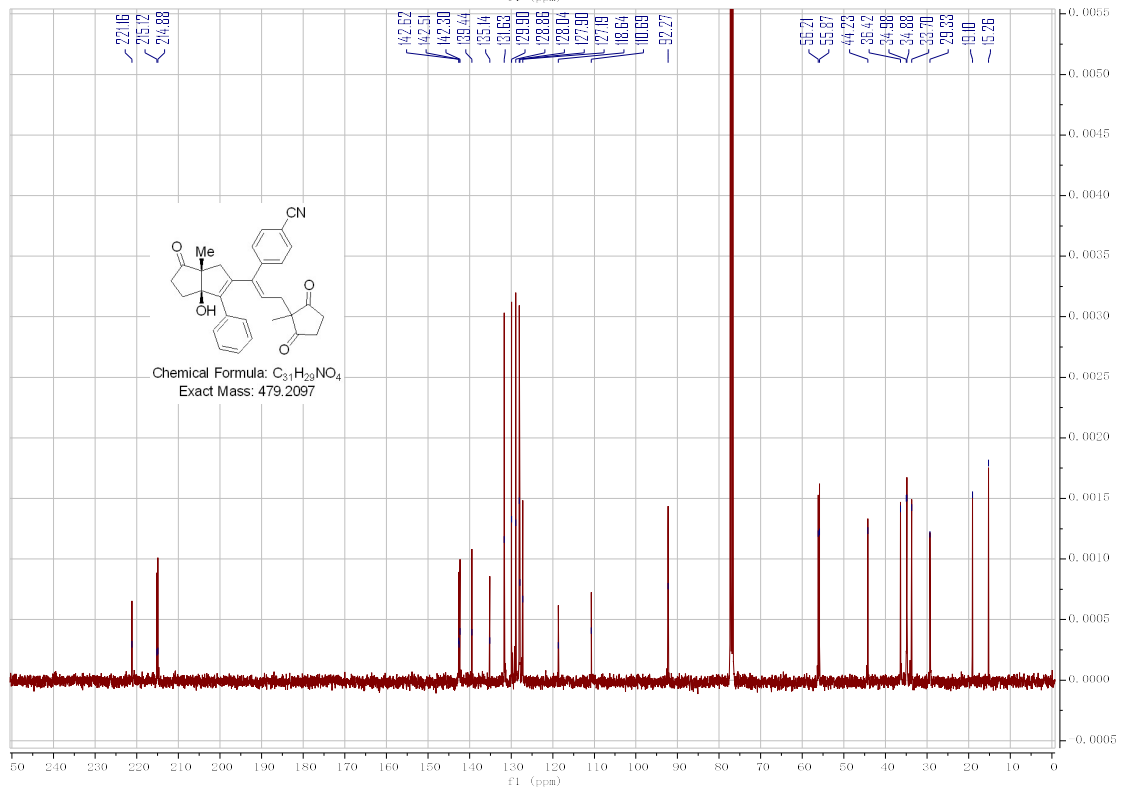

# 5bo

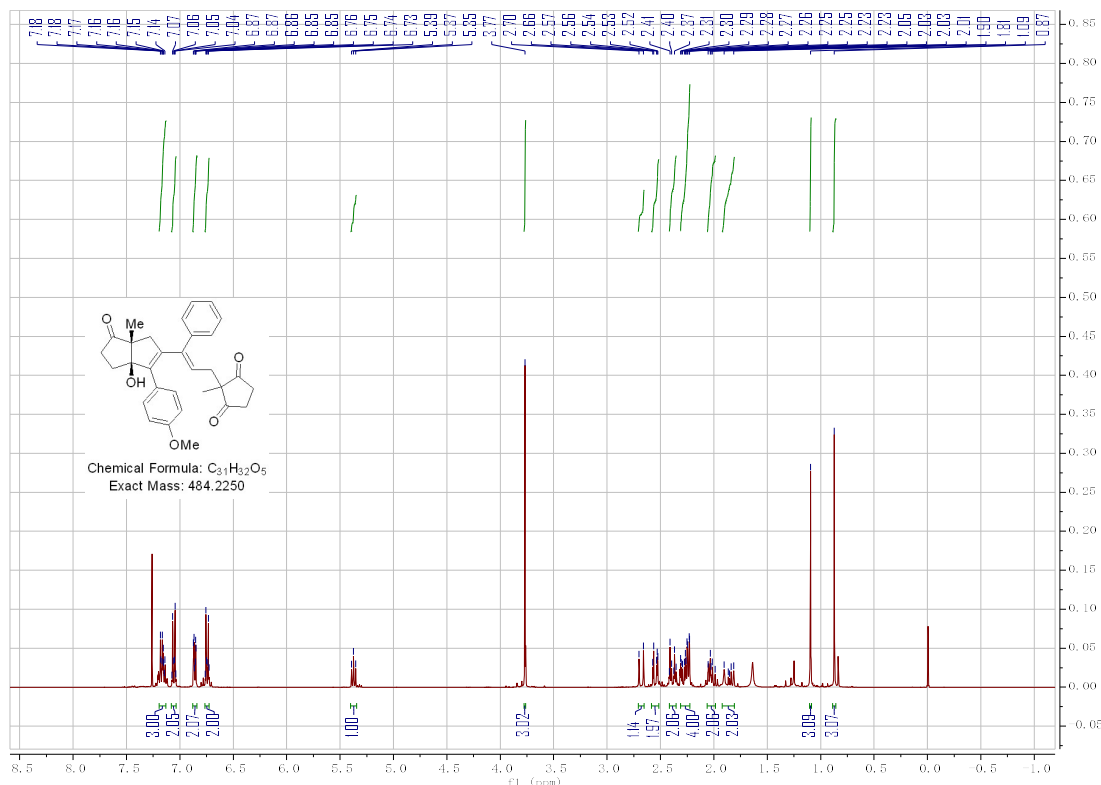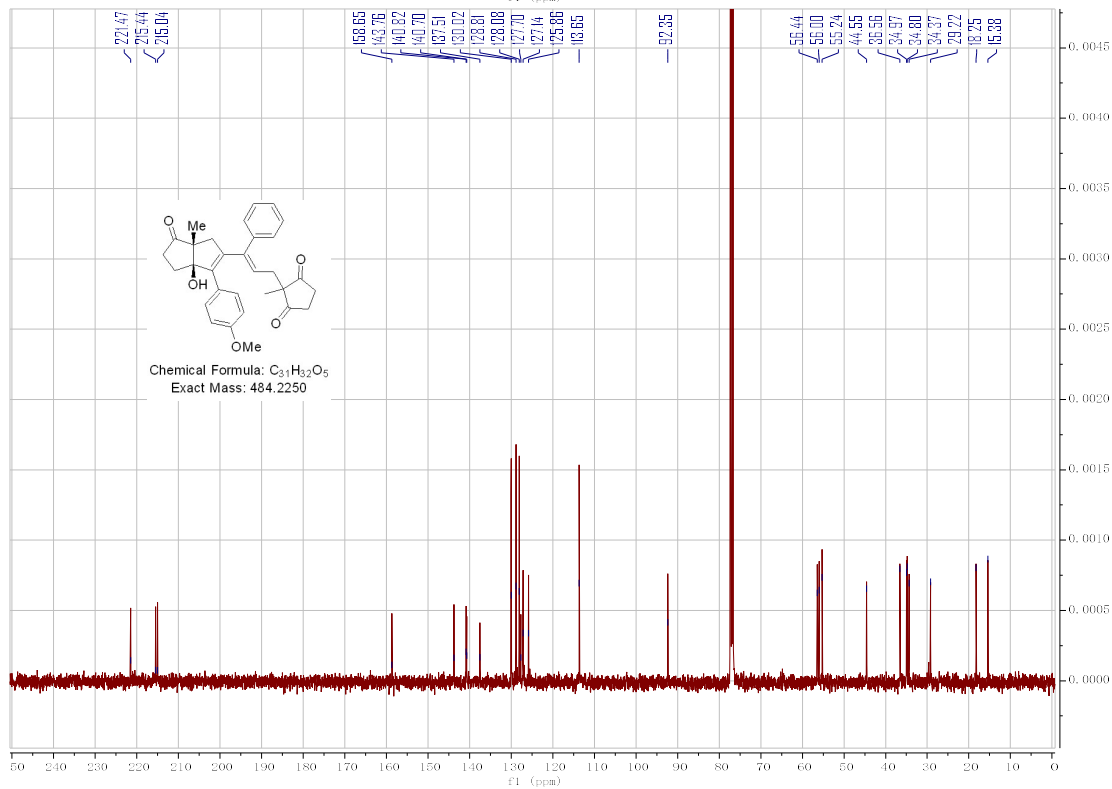

5bp

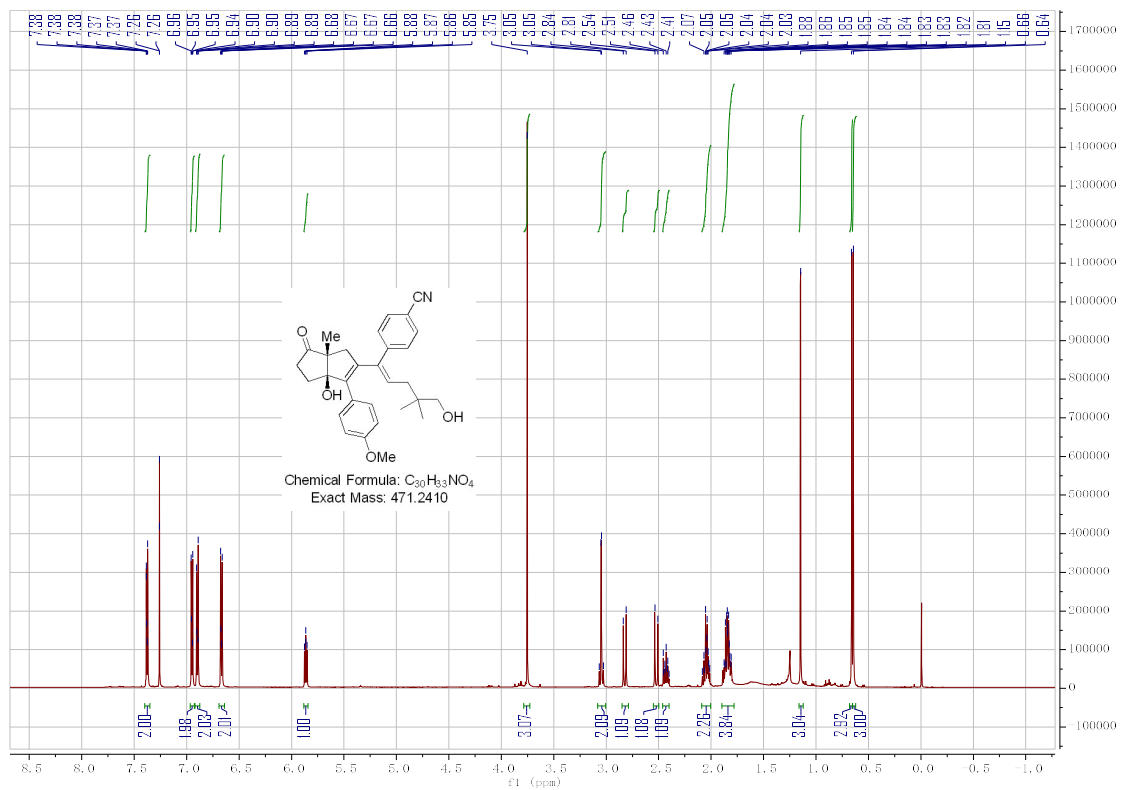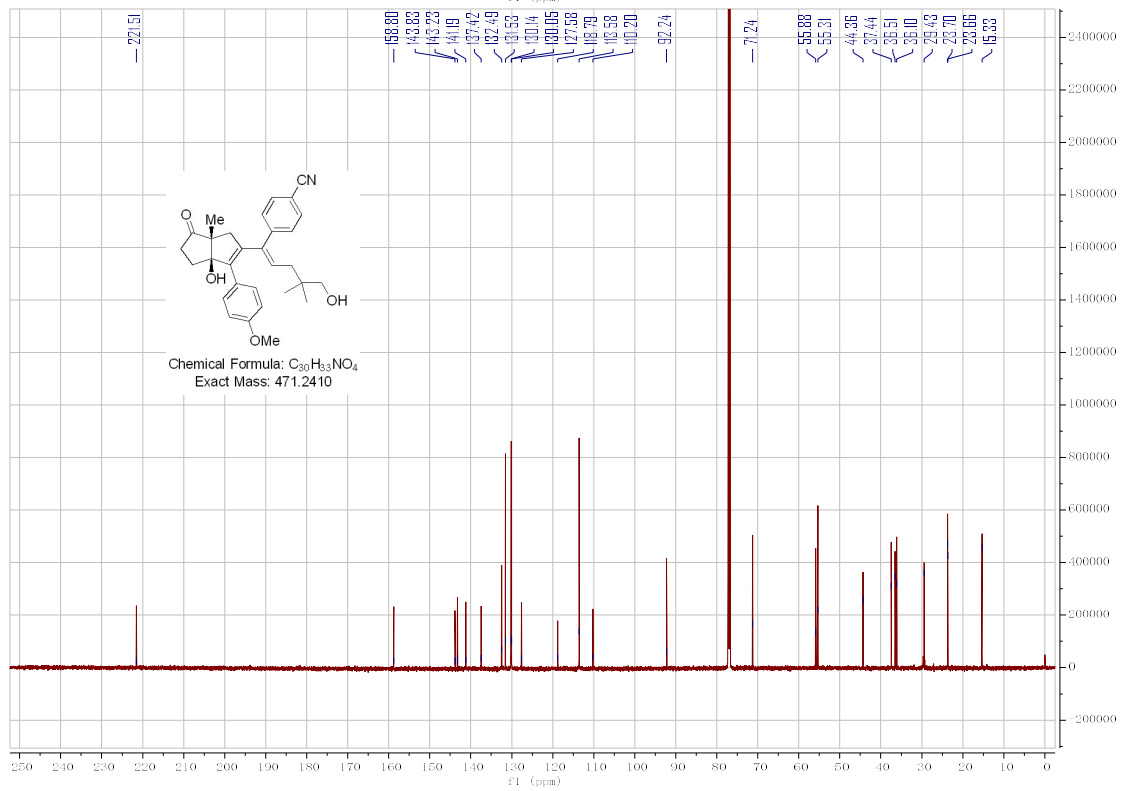



# 5aq

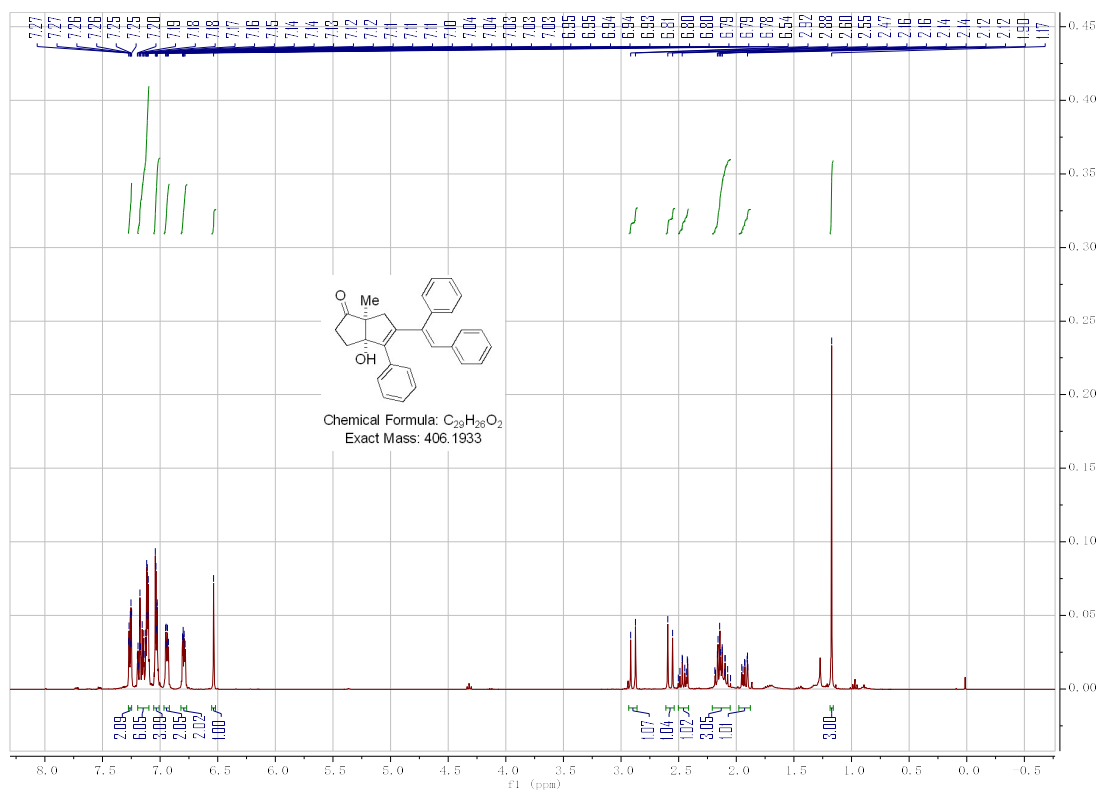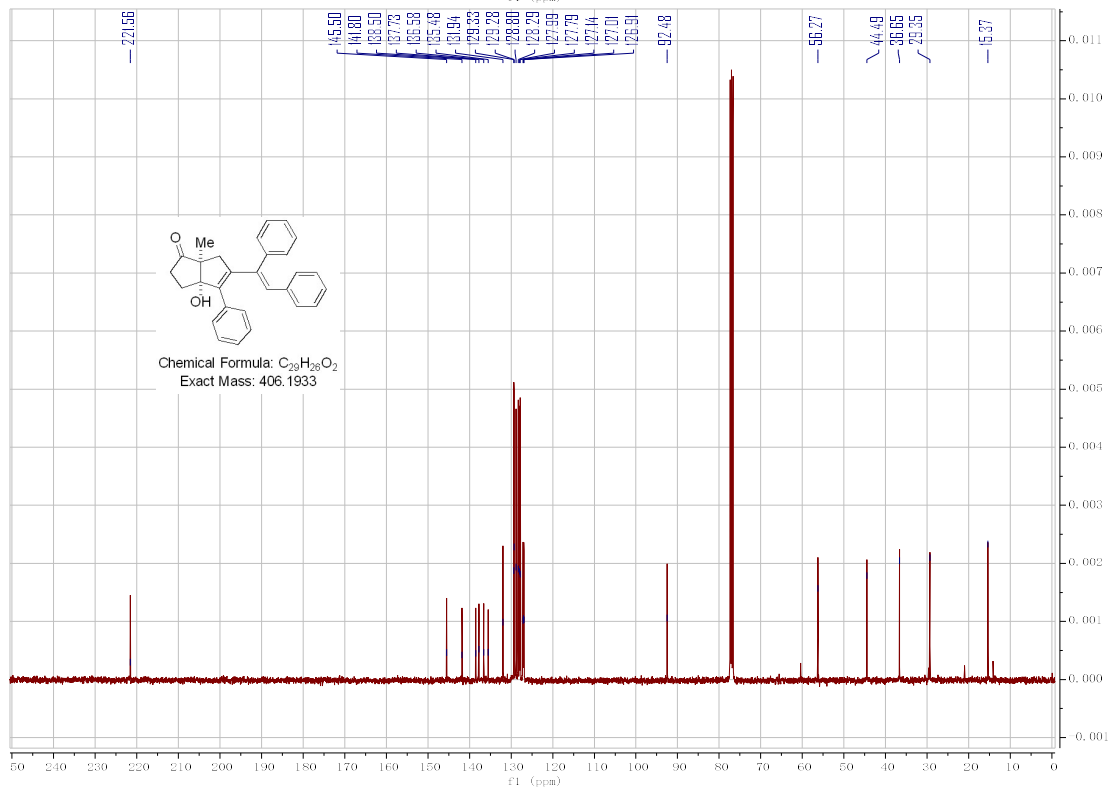

# 5ar

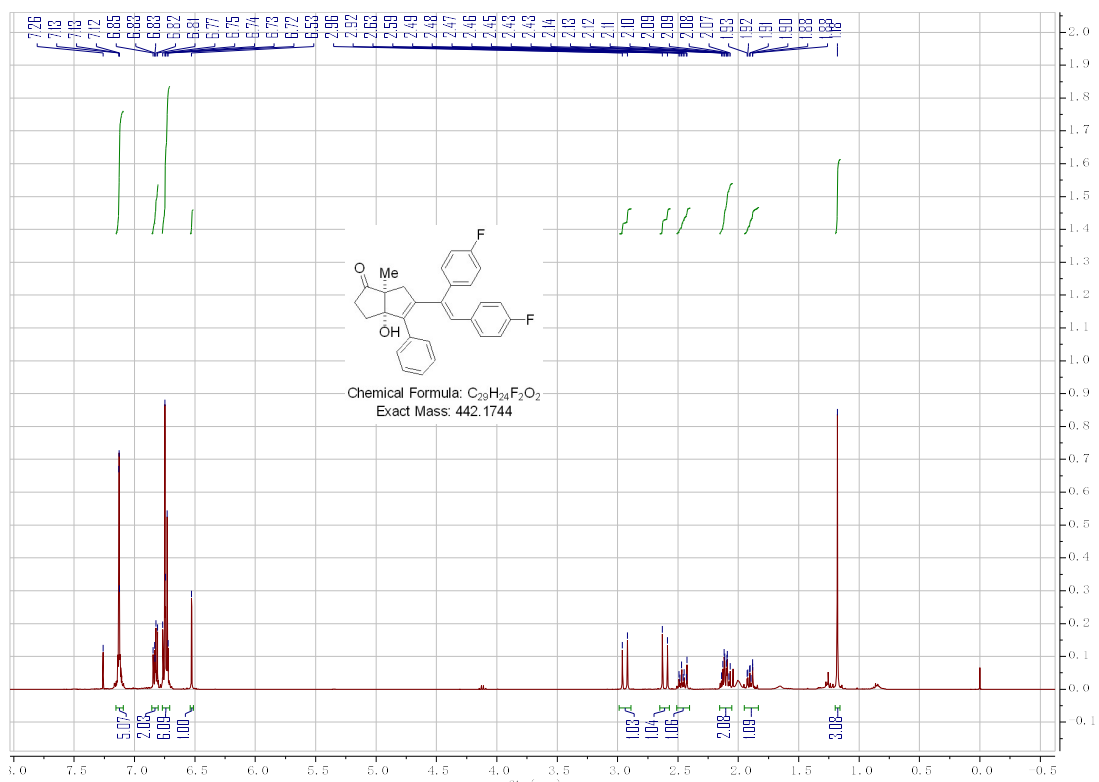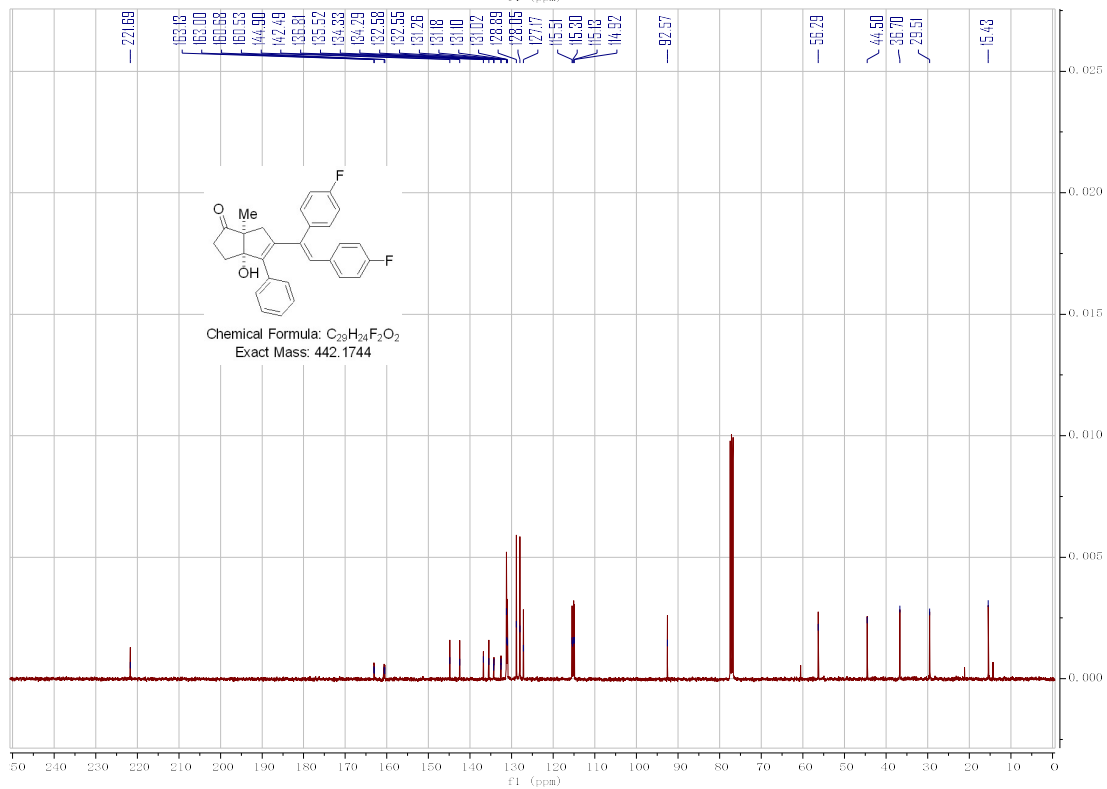

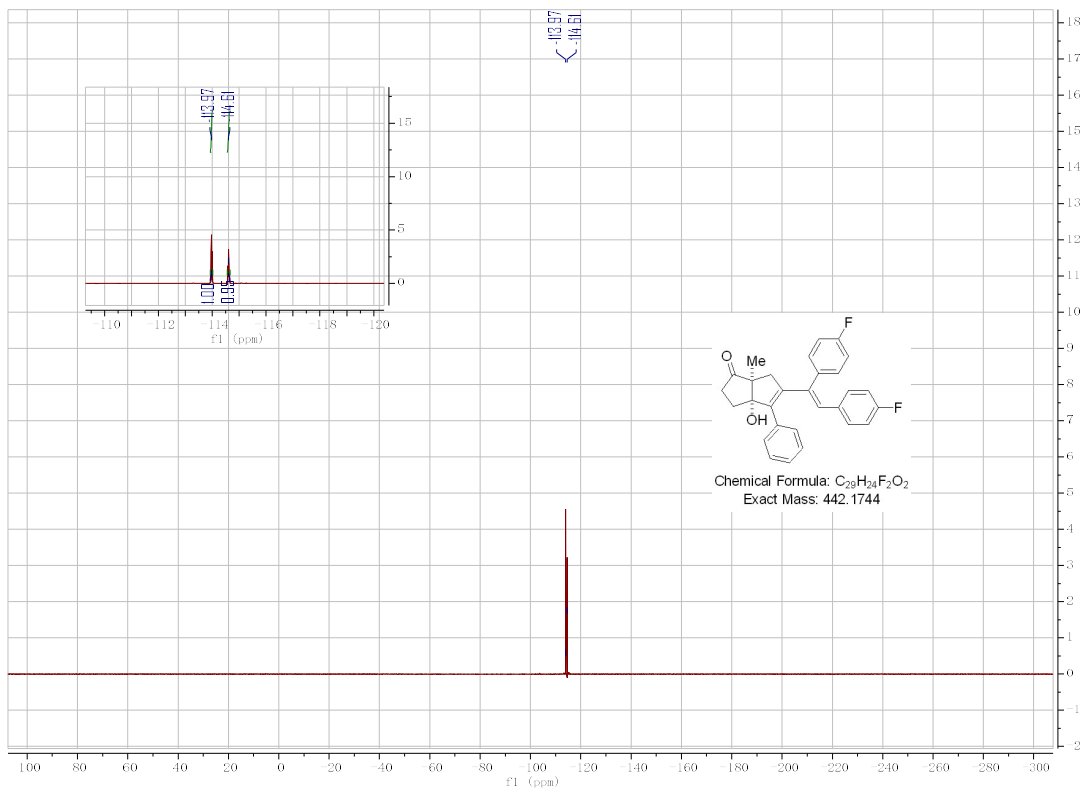

# 5as

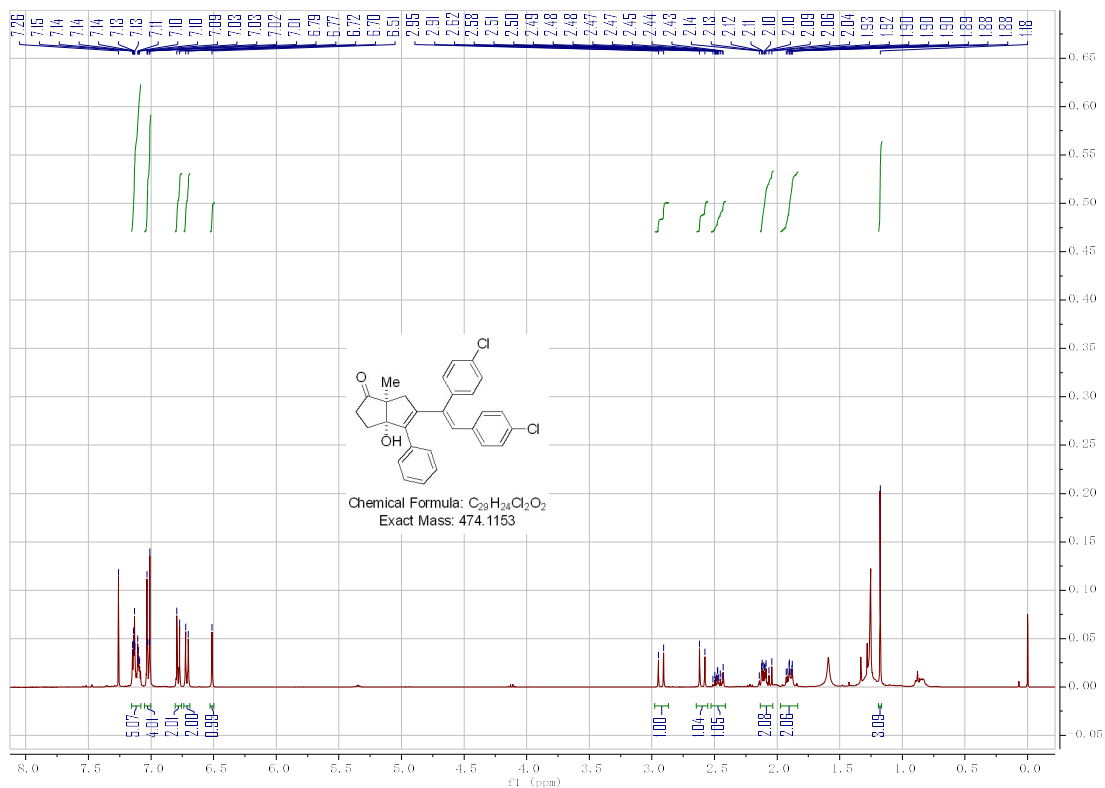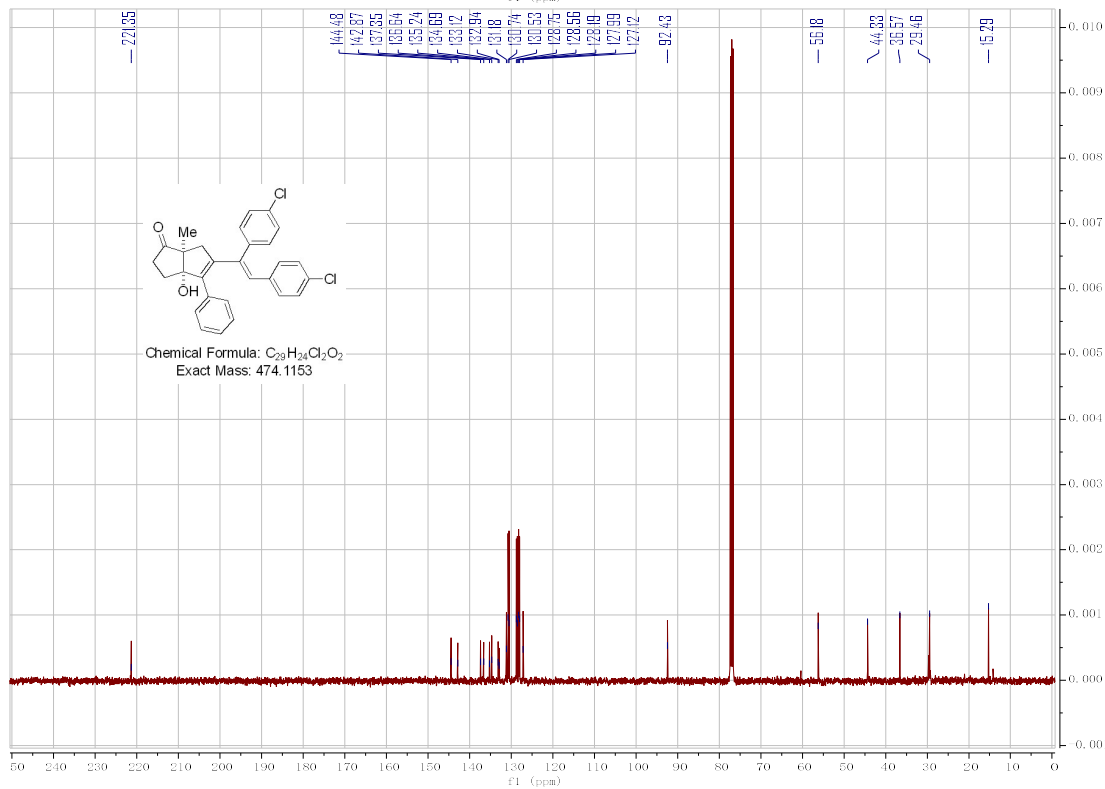

# 5at

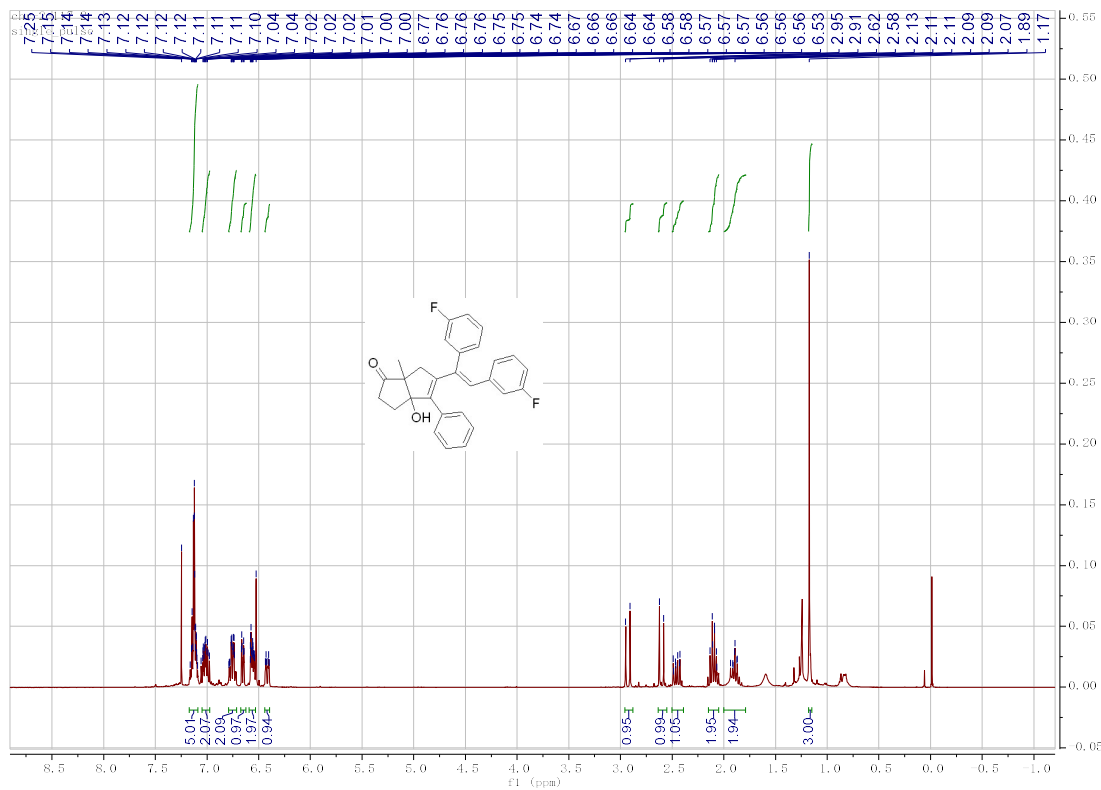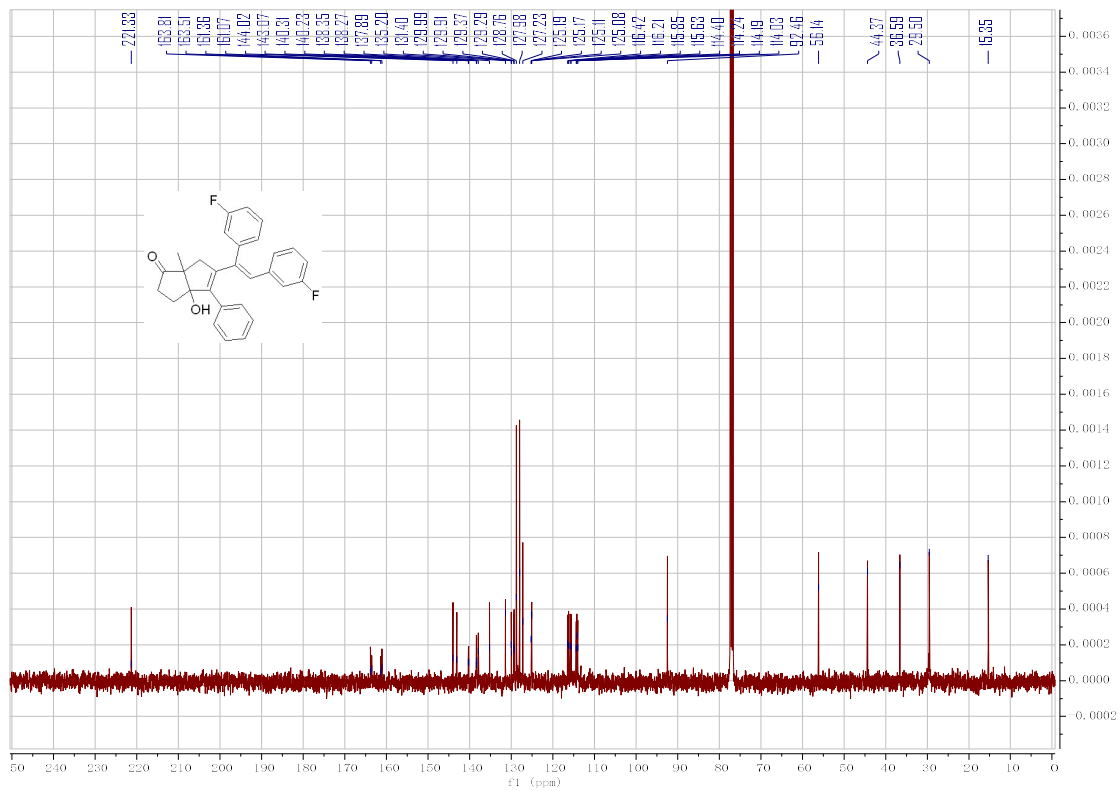

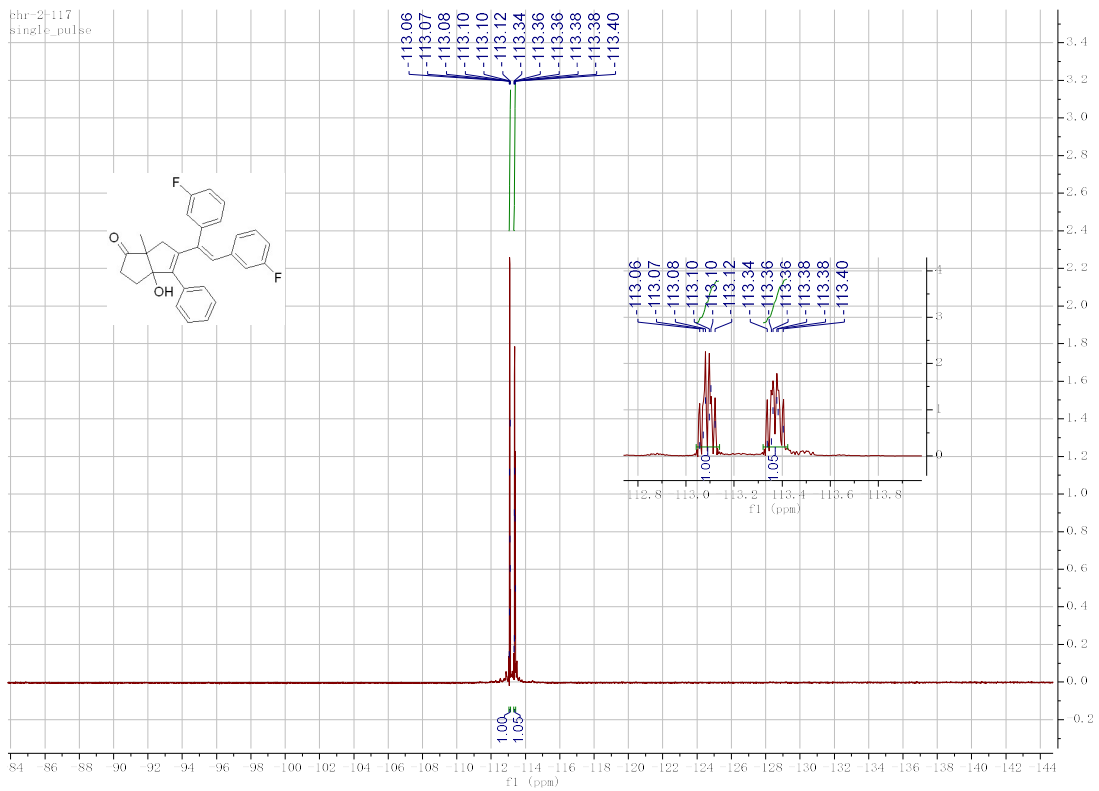



# 5av

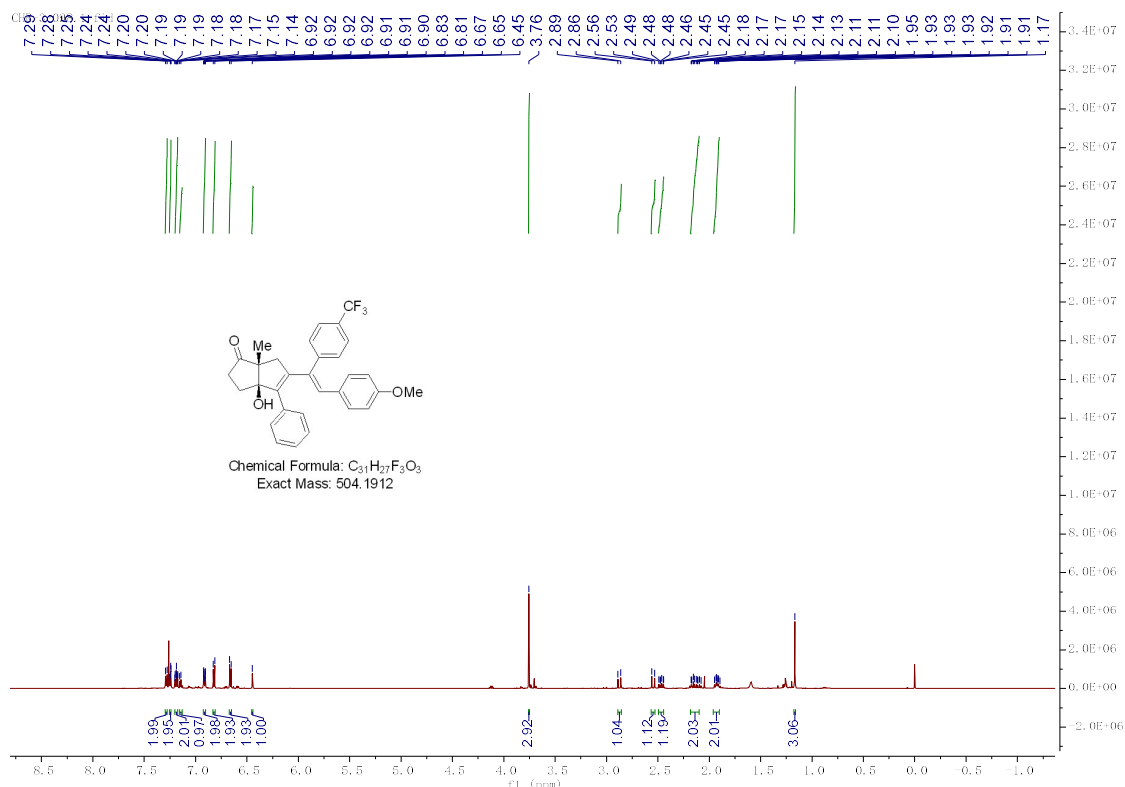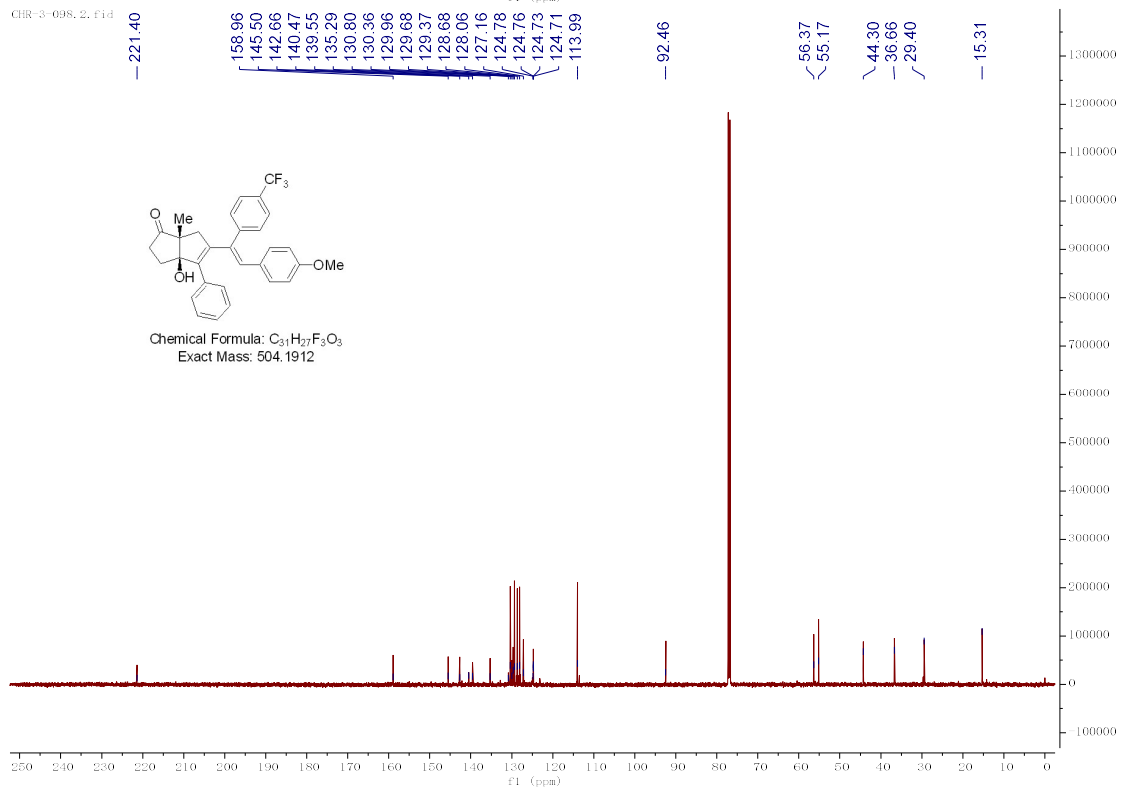



chr-3-097  
single\_pulse

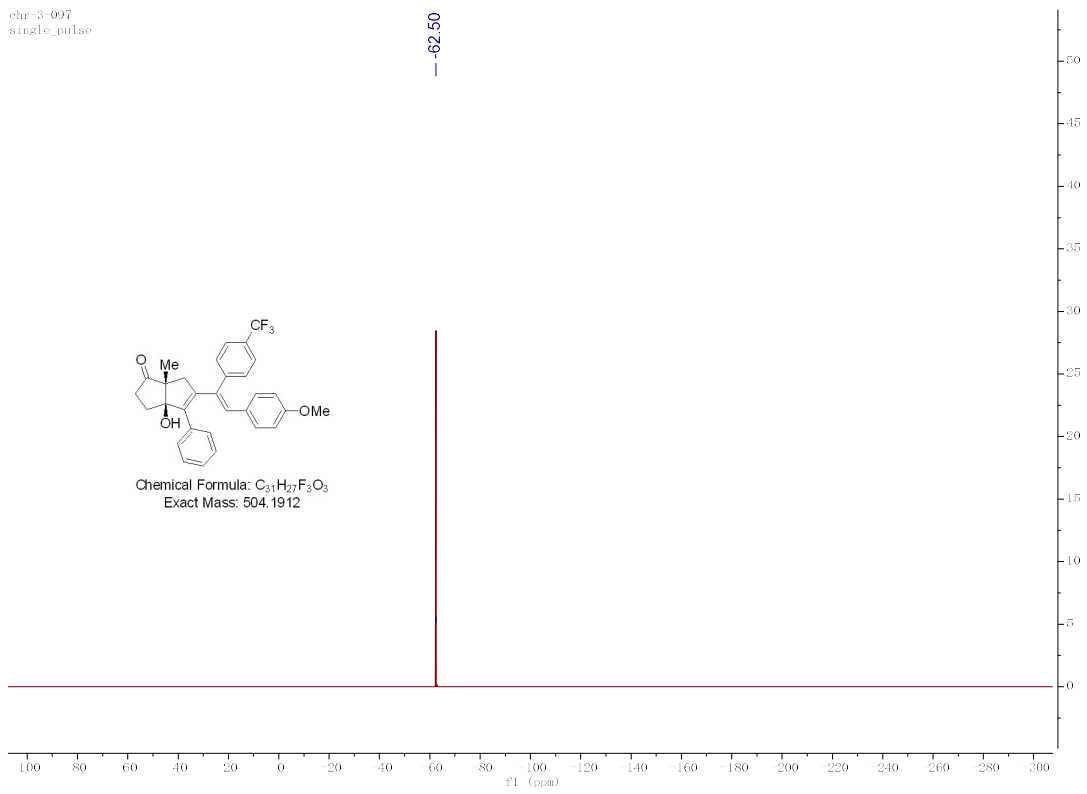

# 5aw

1wf-2-37  
single\_pulse

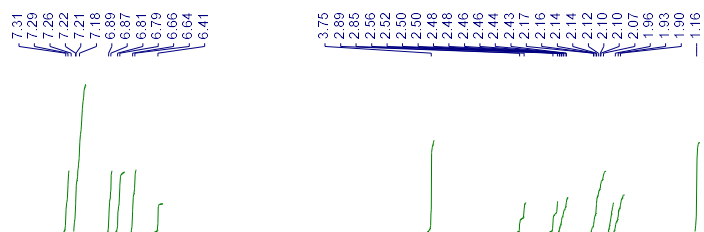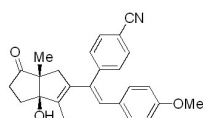

Chemical Formula:  $C_{31}H_{27}NO_3$   
Exact Mass: 461.1991

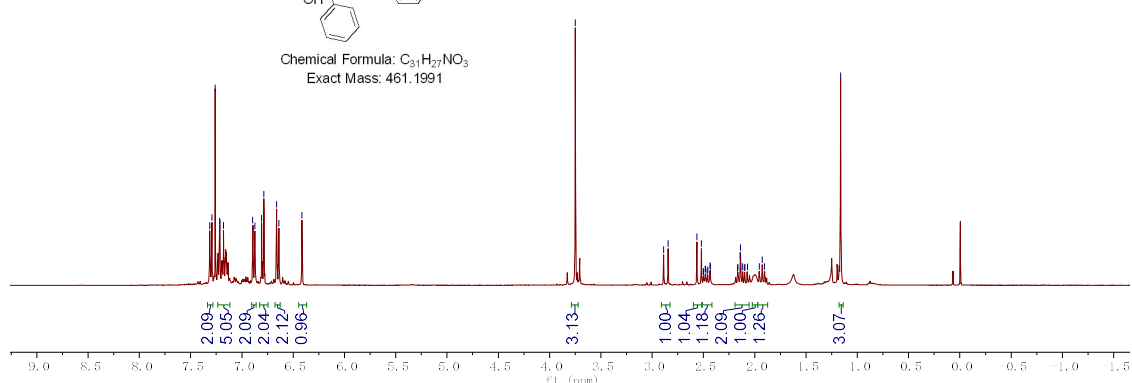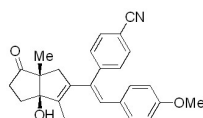

Chemical Formula:  $C_{31}H_{27}NO_3$   
Exact Mass: 461.1991

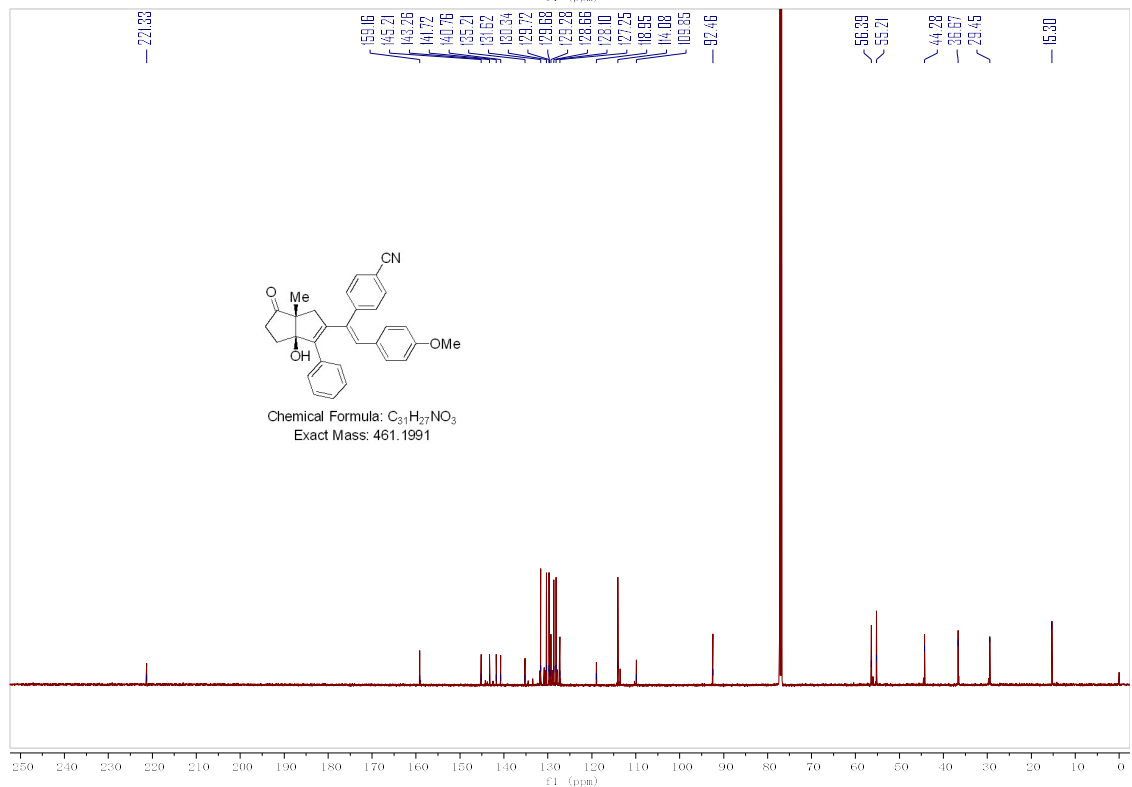

6

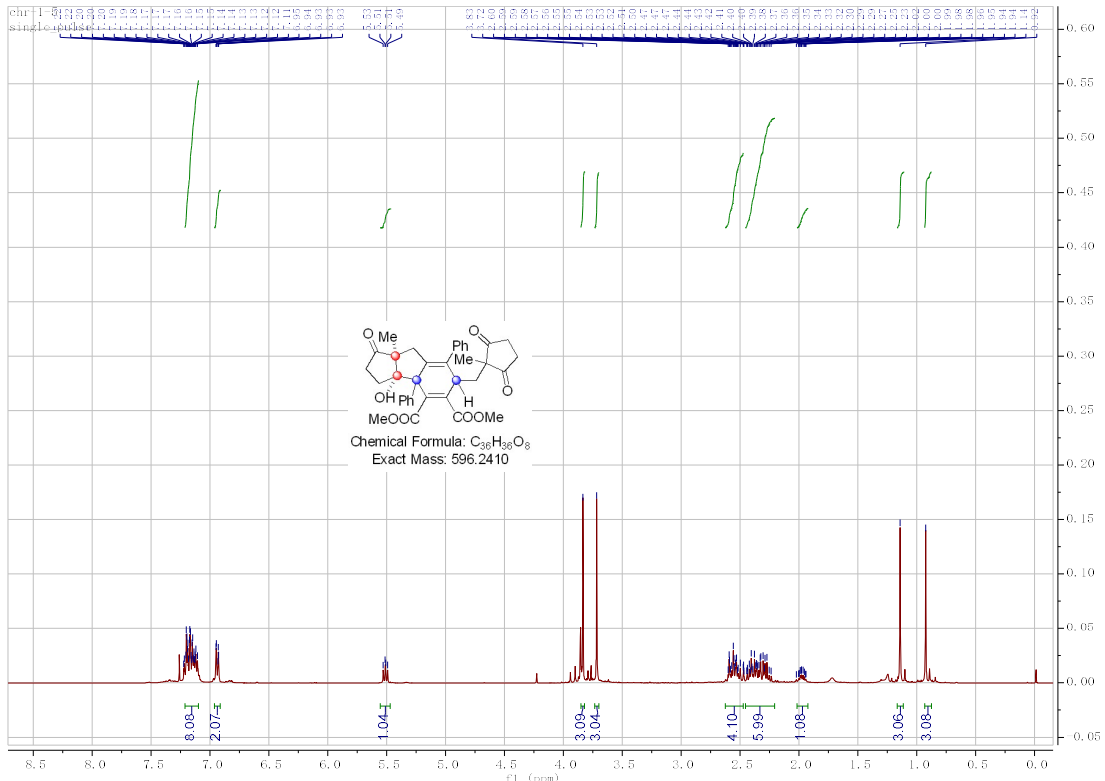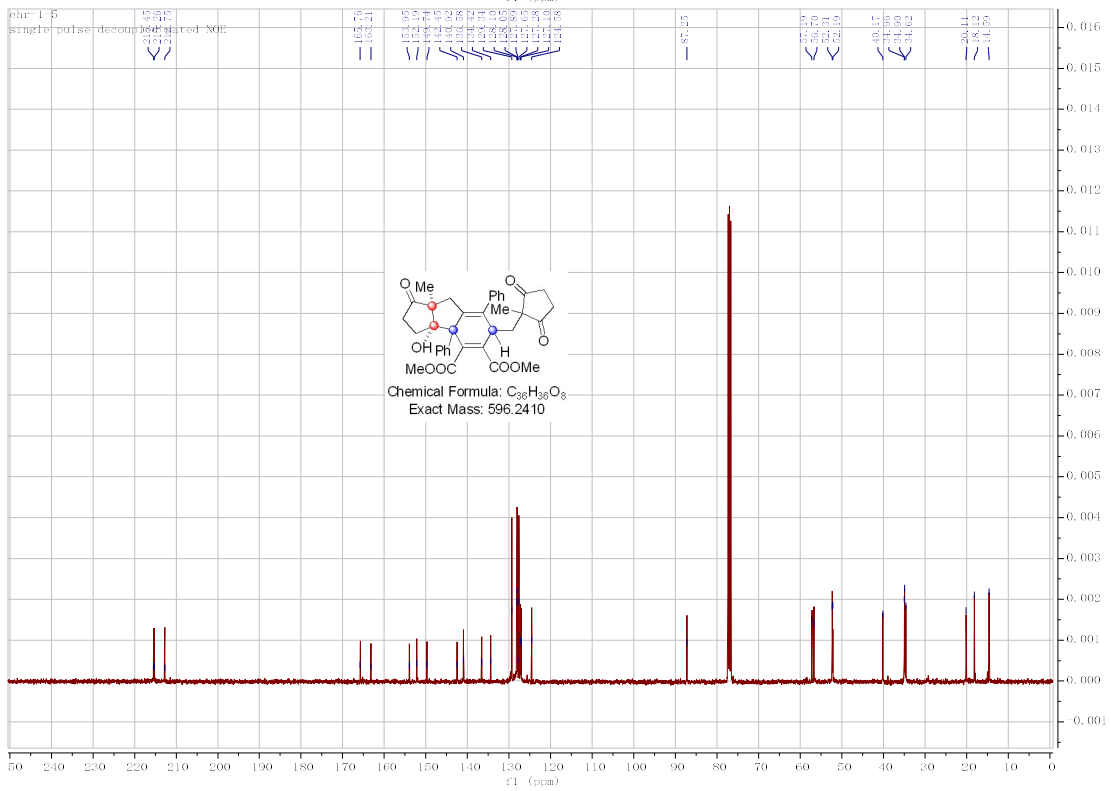

8

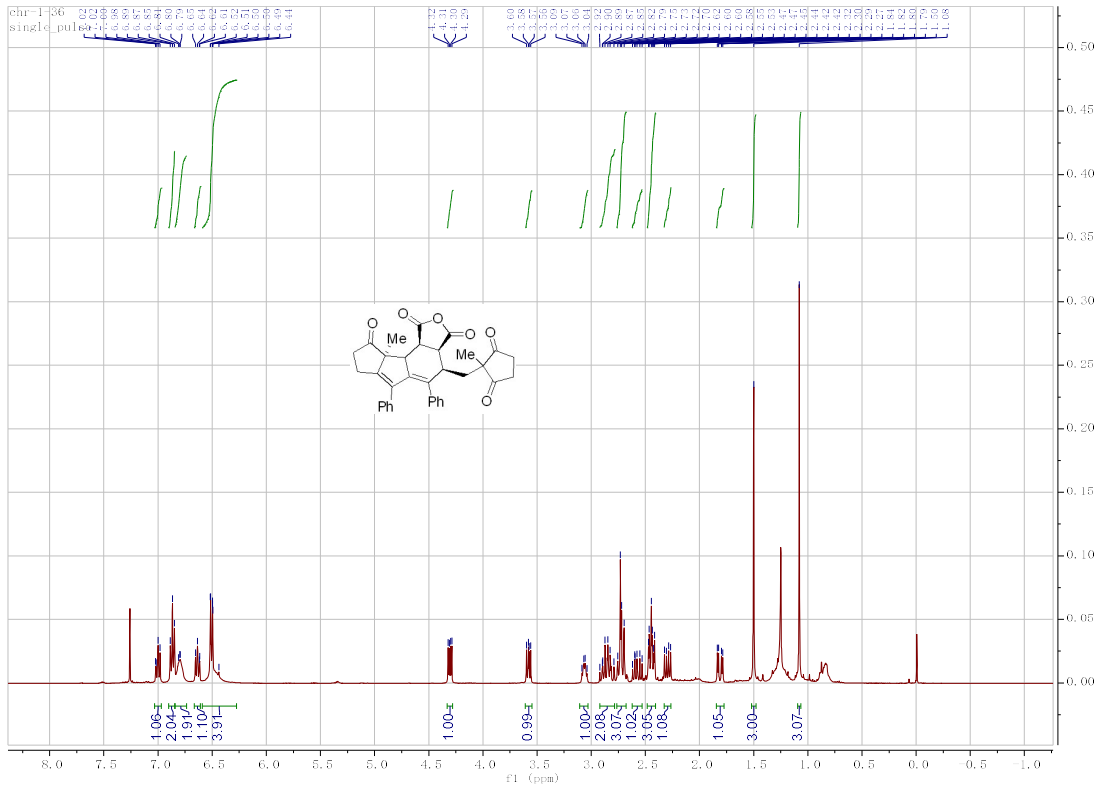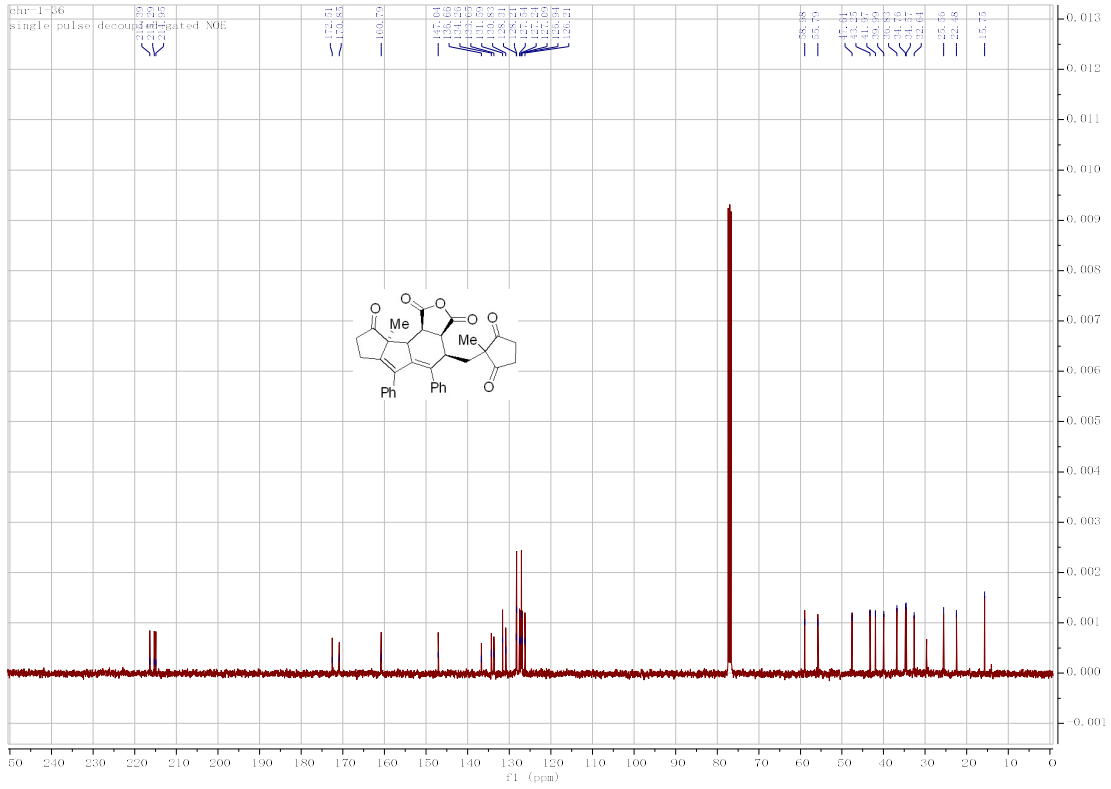

S228

9

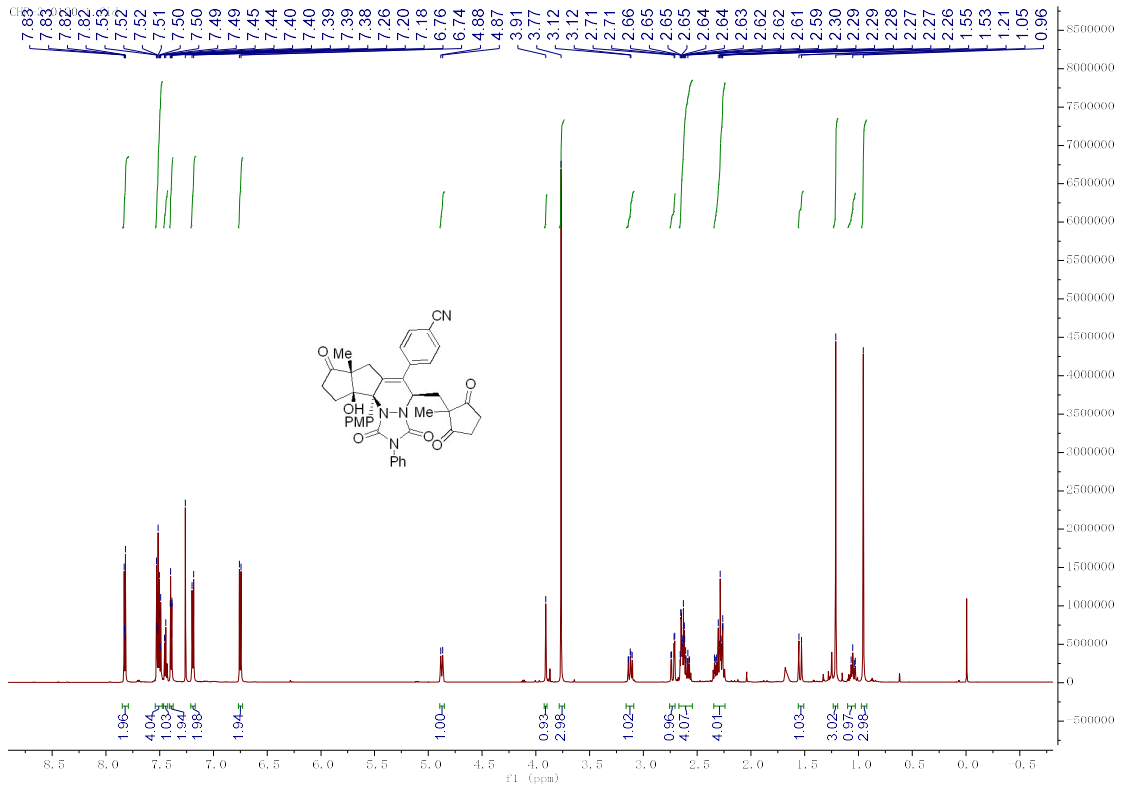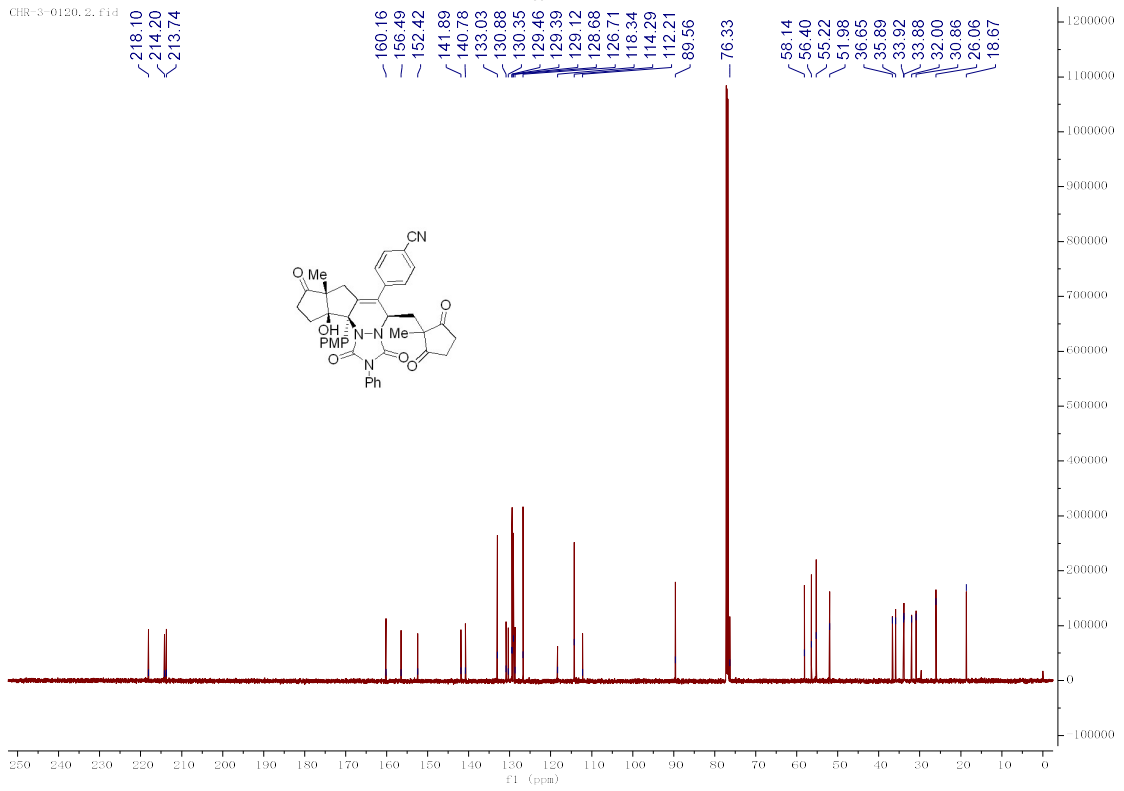

---

## 11. References

---

1. (a) D. B. Ramachary and M. Kishor, *Org. Biomol. Chem.*, 2008, **6**, 4176-4187; (b) S. Cuadros, L. Dell'Amico and P. Melchiorre, *Angew. Chem. Int. Ed.*, 2017, **56**, 11875-11879; (c) S. Kallepu, K. K. Gollapelli, J. B. Nanubol and R. Chegondi, *Chem. Commun.*, 2015, **51**, 16840-16843.
2. (a) S. Zhu, Q. Zhang, K. Chen and H. Jiang, *Angew. Chem. Int. Ed.*, 2015, **54**, 9414-9418; (b) C. Clarke, C. A. Incerti-Pradillos and H. W. Lam, *J. Am. Chem. Soc.*, 2016, **138**, 8068-8071.
3. (a) B. M. Partridge, J. S. González and H. W. Lam, *Angew. Chem. Int. Ed.*, 2014, **53**, 6523-6527; (b) J. D. Dooley, S. R. Chidipudi and H. W. Lam, *J. Am. Chem. Soc.*, 2013, **135**, 10829-10836.
